# Supplementary material for: Comparative Transcriptome Analysis of Hard and Tender Fruit Spines of Cucumber to Identify Genes Involved in the Morphological Development of Fruit Spines
Source: Frontiers journal article supplement (doi:10.3389/fpls.2022.797433), 2022-03-15
Supplement: Data_Sheet_1.ZIP [file Data_Sheet_1.ZIP]

## Sheet: DEG-IIs
DEG-IIs of wild type
	FPKM									log2FC	Regulated Direction	log2FC	Regulated Direction	log2FC	Regulated Direction	Database annotation
Gene_ID	StageII-1	StageII-2	StageII-3	StageIII-1	StageIII-2	StageIII-3	StageIV-1	StageIV-2	StageIV-3	StageIII vs StageII	StageIII vs StageII	StageIV vs StageII	StageIV vs StageII	StageIV vs StageIII	StageIV vs StageIII	COG_class	COG_class_annotation	GO_annotation	KEGG_annotation	KEGG_pathway_annotation	KOG_class	KOG_class_annotation	Pfam_annotation	Swiss_Prot_annotation	NR_annotation
Csa1G000050	1.03894	9.99461	8.47185	0.338674	1.73499	0.604286	1.18433	0.934924	1.0309	-2.84566	down	-2.74858	down	0.112107	normal	--	--	Molecular Function: DNA binding (GO:0003677);; Biological Process: regulation of transcription, DNA-templated (GO:0006355);;	--	--	--	--	DNA Binding Domain (C-terminal) Leafy/Floricaula;; Floricaula / Leafy protein SAM domain	Floricaula/leafy homolog OS=Populus trichocarpa OX=3694 GN=FL PE=2 SV=2	PREDICTED: floricaula/leafy homolog [Cucumis sativus]
Csa1G002660	1.66764	2.64056	3.61359	0.545397	0.892254	0.637773	0.880159	0.715983	1.46169	-1.90908	down	-1.42238	down	0.497587	normal	[E]	Amino acid transport and metabolism	Molecular Function: aminopeptidase activity (GO:0004177);; Cellular Component: vacuolar membrane (GO:0005774);; Cellular Component: cytosol (GO:0005829);; Cellular Component: plasma membrane (GO:0005886);; Biological Process: proteolysis (GO:0006508);; Biological Process: fatty acid beta-oxidation (GO:0006635);; Molecular Function: metallopeptidase activity (GO:0008237);; Molecular Function: zinc…	K01267|0|csv:101216946|K01267 aspartyl aminopeptidase [EC:3.4.11.21] | (RefSeq) probable aspartyl aminopeptidase	--	[E]	Amino acid transport and metabolism	Aminopeptidase I zinc metalloprotease (M18);; M42 glutamyl aminopeptidase	Probable aspartyl aminopeptidase OS=Ricinus communis OX=3988 GN=RCOM_1506700 PE=2 SV=2	PREDICTED: probable aspartyl aminopeptidase [Cucumis sativus]
Csa1G006300	37.6107	27.0072	30.5685	18.5928	19.0828	20.7953	7.57675	8.00385	6.37699	-0.694325	down	-2.17547	down	-1.47374	down	[TK]	Signal transduction mechanisms;; Transcription	Molecular Function: phosphorelay response regulator activity (GO:0000156);; Biological Process: phosphorelay signal transduction system (GO:0000160);; Biological Process: regulation of transcription, DNA-templated (GO:0006355);; Biological Process: intracellular signal transduction (GO:0035556);;	K14492|1.61496e-151|csv:101214143|K14492 two-component response regulator ARR-A family | (RefSeq) two-component response regulator ARR5-like	Plant hormone signal transduction (ko04075)	[K]	Transcription	Response regulator receiver domain	Two-component response regulator ARR5 OS=Arabidopsis thaliana OX=3702 GN=ARR5 PE=1 SV=2	PREDICTED: two-component response regulator ARR5-like [Cucumis sativus]
Csa1G012150	32.1485	22.6023	27.7545	18.7297	14.7778	21.2551	9.05004	10.3434	9.23229	-0.588058	down	-1.6212	down	-1.02606	down	[M]	Cell wall/membrane/envelope biogenesis	Molecular Function: UDP-glucose 6-dehydrogenase activity (GO:0003979);; Cellular Component: cell wall (GO:0005618);; Cellular Component: nucleus (GO:0005634);; Cellular Component: cytosol (GO:0005829);; Biological Process: UDP-glucuronate biosynthetic process (GO:0006065);; Biological Process: D-xylose metabolic process (GO:0042732);; Molecular Function: NAD binding (GO:0051287);; Biological Proc…	K00012|0|csv:101206505|K00012 UDPglucose 6-dehydrogenase [EC:1.1.1.22] | (RefSeq) UDP-glucose 6-dehydrogenase 1	Pentose and glucuronate interconversions (ko00040);; Ascorbate and aldarate metabolism (ko00053);; Starch and sucrose metabolism (ko00500);; Amino sugar and nucleotide sugar metabolism (ko00520)	[GT]	Carbohydrate transport and metabolism;; Signal transduction mechanisms	UDP-glucose/GDP-mannose dehydrogenase family, NAD binding domain;; UDP-glucose/GDP-mannose dehydrogenase family, UDP binding domain;; UDP-glucose/GDP-mannose dehydrogenase family, central domain	UDP-glucose 6-dehydrogenase 1 OS=Glycine max OX=3847 GN=UGD1 PE=2 SV=1	PREDICTED: UDP-glucose 6-dehydrogenase 1 [Cucumis sativus]
Csa1G023080	0.757731	2.24959	1.71159	0.470905	0.474057	0.63565	0.434447	0.518887	0.720607	-1.51847	down	-1.5235	down	0.00370275	normal	--	--	Molecular Function: structural constituent of ribosome (GO:0003735);; Cellular Component: ribosome (GO:0005840);; Biological Process: translation (GO:0006412);;	--	--	--	--	Protein of unknown function (DUF1666)	--	PREDICTED: uncharacterized protein LOC101203868 [Cucumis sativus]
Csa1G025070	0.713705	2.56669	1.59691	0.326171	0.526824	0.452219	0.573492	0.271922	0.217738	-1.86309	down	-2.21251	down	-0.341179	normal	--	--	Cellular Component: cytoplasm (GO:0005737);; Biological Process: gravitropism (GO:0009630);; Biological Process: flower development (GO:0009908);; Cellular Component: basal plasma membrane (GO:0009925);; Biological Process: auxin polar transport (GO:0009926);; Biological Process: xylem and phloem pattern formation (GO:0010051);; Biological Process: inflorescence development (GO:0010229);; Biologi…	K13947|0|csv:101220737|K13947 auxin efflux carrier family | (RefSeq) CsPIN3; probable auxin efflux carrier component 1c	--	--	--	Membrane transport protein	Auxin efflux carrier component 1a OS=Oryza sativa subsp. japonica OX=39947 GN=PIN1A PE=2 SV=1	hypothetical protein Csa_1G025070 [Cucumis sativus]
Csa1G031870	7.28913	45.0245	45.4329	4.05569	6.40088	9.19607	4.53773	7.28045	12.6404	-2.27625	down	-2.03772	down	0.249945	normal	--	--	--	--	--	--	--	--	--	PREDICTED: uncharacterized protein LOC101213981 [Cucumis sativus]
Csa1G033030	2.59018	6.47789	2.95579	1.88876	1.80499	1.7041	1.0277	1.09586	1.17072	-1.13039	down	-1.90364	down	-0.7658	normal	--	--	--	--	--	--	--	TCP family transcription factor	Transcription factor TCP15 OS=Arabidopsis thaliana OX=3702 GN=TCP15 PE=1 SV=1	PREDICTED: transcription factor TCP15-like [Cucumis sativus]
Csa1G042340	1.802	1.52928	3.22847	0.747267	0.445561	1.10386	0.040086	0.197916	0.300141	-1.47794	down	-3.51341	down	--	--	--	--	Molecular Function: protein dimerization activity (GO:0046983);;	--	--	--	--	Helix-loop-helix DNA-binding domain	Transcription factor BEE 3 OS=Arabidopsis thaliana OX=3702 GN=BEE3 PE=2 SV=1	PREDICTED: transcription factor BEE 3-like [Cucumis sativus]
Csa1G042570	1.56173	4.75388	3.46226	0.566638	1.0595	2.30638	1.16922	1.53951	1.47833	-1.29029	down	-1.27068	down	0.0291311	normal	--	--	Cellular Component: mitochondrion (GO:0005739);; Cellular Component: endoplasmic reticulum (GO:0005783);; Cellular Component: membrane (GO:0016020);;	--	--	[U]	Intracellular trafficking, secretion, and vesicular transport	Reticulon	Reticulon-like protein B9 OS=Arabidopsis thaliana OX=3702 GN=RTNLB9 PE=2 SV=1	PREDICTED: reticulon-like protein B9 [Cucumis sativus]
Csa1G042820	1.54893	9.97535	6.29366	1.28961	2.54259	1.36686	2.48513	2.53837	2.23356	-1.73522	down	-1.32641	down	0.420102	normal	[CIR]	Energy production and conversion;; Lipid transport and metabolism;; General function prediction only	Cellular Component: cytoplasm (GO:0005737);; Biological Process: gravitropism (GO:0009630);; Biological Process: flower development (GO:0009908);; Cellular Component: basal plasma membrane (GO:0009925);; Biological Process: auxin polar transport (GO:0009926);; Biological Process: xylem and phloem pattern formation (GO:0010051);; Biological Process: inflorescence development (GO:0010229);; Biologi…	K13947|0|cmo:103502271|K13947 auxin efflux carrier family | (RefSeq) probable auxin efflux carrier component 1c	--	--	--	Membrane transport protein	Auxin efflux carrier component 1a OS=Oryza sativa subsp. japonica OX=39947 GN=PIN1A PE=2 SV=1	PREDICTED: auxin efflux carrier component 1-like isoform X1 [Cucumis sativus]
Csa1G044870	12.2688	31.7346	20.064	9.47953	12.305	8.58249	13.7815	12.583	11.6261	-1.04804	down	-0.79755	down	0.259697	normal	[V]	Defense mechanisms	Cellular Component: vacuolar membrane (GO:0005774);; Cellular Component: plasma membrane (GO:0005886);; Biological Process: drug transmembrane transport (GO:0006855);; Biological Process: pollen development (GO:0009555);; Biological Process: flavonoid metabolic process (GO:0009812);; Biological Process: anther dehiscence (GO:0009901);; Molecular Function: drug transmembrane transporter activity (…	K03327|0|csv:101213233|K03327 multidrug resistance protein, MATE family | (RefSeq) protein TRANSPARENT TESTA 12	--	[R]	General function prediction only	MatE	Protein DETOXIFICATION 35 OS=Arabidopsis thaliana OX=3702 GN=DTX35 PE=1 SV=1	PREDICTED: protein TRANSPARENT TESTA 12 [Cucumis sativus]
Csa1G045900	4.58559	3.79076	3.81775	2.64464	1.80354	2.30845	1.32693	1.23375	1.24071	-0.820568	down	-1.72472	down	-0.896317	down	--	--	--	--	--	--	--	Domain of unknown function (DUF4228)	--	PREDICTED: uncharacterized protein LOC101220404 [Cucumis sativus]
Csa1G045940	1.13037	2.46685	1.74598	0.648486	1.03011	0.843498	0.636849	0.813175	0.963253	-1.05409	down	-1.18326	down	-0.120357	normal	--	--	Molecular Function: metal ion binding (GO:0046872);;	--	--	[O]	Posttranslational modification, protein turnover, chaperones	Ring finger domain;; RING-like zinc finger;; RING-H2 zinc finger domain;; Zinc finger, C3HC4 type (RING finger);; Zinc finger, C3HC4 type (RING finger);; Anaphase-promoting complex subunit 11 RING-H2 finger	RING-H2 finger protein ATL47 OS=Arabidopsis thaliana OX=3702 GN=ATL47 PE=2 SV=1	PREDICTED: RING-H2 finger protein ATL46-like [Cucumis sativus]
Csa1G046250	0.590129	2.34952	1.65814	0.590932	0.688847	0.392393	0.667825	0.43794	0.447715	-1.41773	down	-1.59966	down	-0.171815	normal	--	--	Cellular Component: cell part (GO:0044464);;	K18726|0|csv:101205471|K18726 FAS-associated factor 2 | (RefSeq) FAS-associated factor 2-like	--	[T]	Signal transduction mechanisms	UBX domain	Plant UBX domain-containing protein 10 OS=Arabidopsis thaliana OX=3702 GN=PUX10 PE=2 SV=1	PREDICTED: FAS-associated factor 2-like isoform X1 [Cucumis sativus]
Csa1G046260	3.22648	8.61439	6.51468	2.62387	3.53427	3.06423	2.86978	2.5308	2.52241	-0.959553	down	-1.25356	down	-0.284919	normal	--	--	Cellular Component: extracellular region (GO:0005576);;	--	--	--	--	Neprosin;; Neprosin activation peptide	--	PREDICTED: uncharacterized protein LOC101205708 [Cucumis sativus]
Csa1G050380	1.44771	3.65274	2.02898	0.768992	0.73954	1.08295	0.955395	0.732092	1.23057	-1.42723	down	-1.33279	down	0.102274	normal	[E]	Amino acid transport and metabolism	Molecular Function: argininosuccinate synthase activity (GO:0004055);; Molecular Function: ATP binding (GO:0005524);; Biological Process: arginine biosynthetic process (GO:0006526);; Biological Process: threonine catabolic process (GO:0006567);; Biological Process: nucleotide biosynthetic process (GO:0009165);; Cellular Component: chloroplast stroma (GO:0009570);;	K01940|0|csv:101212271|K01940 argininosuccinate synthase [EC:6.3.4.5] | (RefSeq) argininosuccinate synthase, chloroplastic-like	Arginine biosynthesis (ko00220);; Alanine, aspartate and glutamate metabolism (ko00250);; Biosynthesis of amino acids (ko01230)	[E]	Amino acid transport and metabolism	Arginosuccinate synthase	Argininosuccinate synthase, chloroplastic OS=Arabidopsis thaliana OX=3702 GN=At4g24830 PE=1 SV=3	PREDICTED: argininosuccinate synthase, chloroplastic-like [Cucumis sativus]
Csa1G051580	13.6695	16.6919	17.6471	4.12061	5.33618	12.8539	1.20794	0.996009	1.11335	-1.11289	down	-3.91635	down	-2.79677	down	--	--	Molecular Function: DNA binding (GO:0003677);; Molecular Function: transcription factor activity, sequence-specific DNA binding (GO:0003700);; Cellular Component: nucleus (GO:0005634);; Biological Process: regulation of transcription, DNA-templated (GO:0006355);; Molecular Function: protein dimerization activity (GO:0046983);;	K09264|9.18714e-89|csv:101222812|K09264 MADS-box transcription factor, plant | (RefSeq) ERAF17, cus3; truncated transcription factor CAULIFLOWER D-like	--	[K]	Transcription	K-box region	Transcription factor CAULIFLOWER OS=Arabidopsis lyrata subsp. lyrata OX=81972 GN=CAL PE=3 SV=1	hypothetical protein Csa_1G051580 [Cucumis sativus]
Csa1G051620	15.6871	21.2486	28.0783	12.6863	15.2741	12.591	12.1098	11.1644	12.544	-0.666973	down	-0.913743	down	-0.236789	normal	--	--	Cellular Component: nucleus (GO:0005634);; Cellular Component: cytoplasm (GO:0005737);; Cellular Component: plasma membrane (GO:0005886);; Biological Process: virus induced gene silencing (GO:0009616);; Biological Process: vegetative phase change (GO:0010050);; Molecular Function: transition metal ion binding (GO:0046914);; Biological Process: cellular transition metal ion homeostasis (GO:0046916…	--	--	[P]	Inorganic ion transport and metabolism	Heavy-metal-associated domain	Heavy metal-associated isoprenylated plant protein 7 OS=Arabidopsis thaliana OX=3702 GN=HIPP07 PE=1 SV=1	hypothetical protein Csa_1G051620 [Cucumis sativus]
Csa1G056980	0.90026	9.56212	6.24835	0.235259	0.30246	0.60138	0.25555	0.59964	0.391868	-3.79636	down	-3.71045	down	--	--	--	--	Cellular Component: intracellular (GO:0005622);; Cellular Component: mitochondrion (GO:0005739);; Molecular Function: zinc ion binding (GO:0008270);;	--	--	--	--	PLATZ transcription factor	--	PREDICTED: uncharacterized protein LOC101205397 [Cucumis sativus]
Csa1G064690	1.06146	2.71684	2.15747	0.664506	0.750985	0.306955	0.81351	0.775857	0.599256	-1.73671	down	-1.46263	down	--	--	--	--	Cellular Component: nucleus (GO:0005634);; Cellular Component: nuclear envelope (GO:0005635);; Cellular Component: cytoplasm (GO:0005737);; Biological Process: protein import into nucleus (GO:0006606);; Biological Process: lipid transport (GO:0006869);; Biological Process: intra-Golgi vesicle-mediated transport (GO:0006891);; Molecular Function: Ran GTPase binding (GO:0008536);; Molecular Functio…	--	--	[U]	Intracellular trafficking, secretion, and vesicular transport	Nuclear transport factor 2 (NTF2) domain	Nuclear transport factor 2B OS=Arabidopsis thaliana OX=3702 GN=NTF2B PE=1 SV=1	PREDICTED: nuclear transport factor 2 [Cucumis sativus]
Csa1G073050	0.979814	3.18392	2.90282	0.453003	1.02284	0.878313	0.322754	0.227204	0.201504	-1.55946	down	-3.23189	down	--	--	[E]	Amino acid transport and metabolism	Molecular Function: serine-type carboxypeptidase activity (GO:0004185);; Biological Process: proteolysis (GO:0006508);;	K16297|0|csv:101206544|K16297 serine carboxypeptidase-like clade II [EC:3.4.16.-] | (RefSeq) serine carboxypeptidase-like 31	--	[OE]	Posttranslational modification, protein turnover, chaperones;; Amino acid transport and metabolism	Serine carboxypeptidase	Serine carboxypeptidase-like 31 OS=Arabidopsis thaliana OX=3702 GN=SCPL31 PE=2 SV=2	PREDICTED: serine carboxypeptidase-like 31 [Cucumis sativus]
Csa1G073640	341.846	186.886	301.833	158.45	134.938	209.545	97.1048	100.893	126.495	-0.71941	down	-1.42337	down	-0.696335	down	--	--	Cellular Component: chloroplast (GO:0009507);; Cellular Component: thylakoid (GO:0009579);; Molecular Function: oxidoreductase activity (GO:0016491);; Biological Process: single-organism metabolic process (GO:0044710);;	K00422|0|csv:101220458|K00422 polyphenol oxidase [EC:1.10.3.1] | (RefSeq) polyphenol oxidase, chloroplastic-like	Tyrosine metabolism (ko00350);; Isoquinoline alkaloid biosynthesis (ko00950)	--	--	Protein of unknown function (DUF_B2219);; Common central domain of tyrosinase;; Polyphenol oxidase middle domain	Polyphenol oxidase, chloroplastic OS=Malus domestica OX=3750 PE=2 SV=1	PREDICTED: polyphenol oxidase, chloroplastic-like [Cucumis sativus]
Csa1G085370	0.582219	1.33767	1.08261	0.104805	0.318569	0.224942	0.132956	0.073212	0.205831	-2.12732	down	-2.8093	down	--	--	[DPM]	Cell cycle control, cell division, chromosome partitioning;; Inorganic ion transport and metabolism;; Cell wall/membrane/envelope biogenesis	Molecular Function: copper ion binding (GO:0005507);; Molecular Function: L-ascorbate oxidase activity (GO:0008447);; Biological Process: lignin catabolic process (GO:0046274);; Cellular Component: apoplast (GO:0048046);; Molecular Function: hydroquinone:oxygen oxidoreductase activity (GO:0052716);; Biological Process: oxidation-reduction process (GO:0055114);;	K05909|0|csv:101217456|K05909 laccase [EC:1.10.3.2] | (RefSeq) laccase-17-like	--	[Q]	Secondary metabolites biosynthesis, transport and catabolism	Multicopper oxidase;; Multicopper oxidase;; Multicopper oxidase	Laccase-17 OS=Arabidopsis thaliana OX=3702 GN=LAC17 PE=2 SV=1	PREDICTED: laccase-17-like [Cucumis sativus]
Csa1G089510	2.48605	4.79693	4.61579	1.09038	1.50377	1.77131	2.41357	2.07729	2.52755	-1.42397	down	-0.808071	down	0.625018	normal	--	--	--	--	--	--	--	Dof domain, zinc finger	Dof zinc finger protein DOF5.3 OS=Arabidopsis thaliana OX=3702 GN=DOF5.3 PE=2 SV=1	PREDICTED: dof zinc finger protein DOF2.1-like [Cucumis sativus]
Csa1G096090	90.1772	56.3558	49.7556	24.3	26.1086	33.9446	2.77003	4.77717	2.56105	-1.17769	down	-4.27145	down	-3.0881	down	[C]	Energy production and conversion	Molecular Function: oxidoreductase activity, acting on CH-OH group of donors (GO:0016614);;	--	--	--	--	Berberine and berberine like	Cannabidiolic acid synthase OS=Cannabis sativa OX=3483 GN=CBDAS PE=1 SV=1	hypothetical protein Csa_1G096090 [Cucumis sativus]
Csa1G109330	2.37671	5.92854	3.88335	0.431186	1.37623	1.03183	0.882134	0.661648	1.38705	-2.07068	down	-2.10258	down	-0.0218425	normal	[E]	Amino acid transport and metabolism	Molecular Function: carboxypeptidase activity (GO:0004180);; Cellular Component: intracellular membrane-bounded organelle (GO:0043231);; Cellular Component: cytoplasmic part (GO:0044444);;	K16298|0|csv:101220848|K16298 serine carboxypeptidase-like clade IV [EC:3.4.16.-] | (RefSeq) serine carboxypeptidase-like	--	[OE]	Posttranslational modification, protein turnover, chaperones;; Amino acid transport and metabolism	Serine carboxypeptidase	Serine carboxypeptidase-like 48 OS=Arabidopsis thaliana OX=3702 GN=SCPL48 PE=2 SV=2	Serine carboxypeptidase [Cucumis sativus]
Csa1G120470	176.509	173.041	158.342	117.622	101.616	108.015	78.7784	85.5665	64.568	-0.633462	down	-1.22418	down	-0.583492	normal	[P]	Inorganic ion transport and metabolism	Molecular Function: carbonate dehydratase activity (GO:0004089);; Molecular Function: calcium-transporting ATPase activity (GO:0005388);; Molecular Function: calmodulin binding (GO:0005516);; Cellular Component: plasma membrane (GO:0005886);; Biological Process: one-carbon metabolic process (GO:0006730);; Biological Process: calcium ion transport (GO:0006816);; Biological Process: cellular zinc i…	K01674|0|csv:101214956|K01674 carbonic anhydrase [EC:4.2.1.1] | (RefSeq) alpha carbonic anhydrase 7	Nitrogen metabolism (ko00910)	[R]	General function prediction only	Eukaryotic-type carbonic anhydrase	Alpha carbonic anhydrase 7 OS=Arabidopsis thaliana OX=3702 GN=ACA7 PE=2 SV=1	PREDICTED: alpha carbonic anhydrase 7 [Cucumis sativus]
Csa1G123470	30.4145	66.5	58.7349	29.3314	25.8713	32.3965	25.7138	13.6412	26.5653	-0.803499	down	-1.28846	down	-0.47596	normal	--	--	Cellular Component: cell wall (GO:0005618);; Cellular Component: vacuole (GO:0005773);; Cellular Component: cytosol (GO:0005829);; Cellular Component: plasmodesma (GO:0009506);;	--	--	--	--	Aspartic acid proteinase inhibitor	--	Cystatin Hv-CPI6 [Cucumis sativus]
Csa1G132720	1.22622	3.5176	2.36311	0.68715	0.778239	0.82779	1.01908	0.815025	1.62047	-1.5808	down	-1.0888	down	--	--	--	--	--	--	--	--	--	Late embryogenesis abundant protein	Uncharacterized protein At1g08160 OS=Arabidopsis thaliana OX=3702 GN=At1g08160 PE=2 SV=1	PREDICTED: uncharacterized protein At1g08160 [Cucumis sativus]
Csa1G161590	3.02082	2.8952	2.68673	1.40787	1.61834	1.02105	1.51459	1.02972	1.19786	-1.13594	down	-1.234	down	-0.089524	normal	--	--	--	--	--	--	--	--	--	hypothetical protein Csa_1G161590 [Cucumis sativus]
Csa1G165210	95.4239	65.8395	100.67	48.3897	56.0131	48.9262	52.1858	44.0997	76.5568	-0.769002	down	-0.664862	down	0.113679	normal	--	--	Biological Process: regulation of metabolic process (GO:0019222);; Cellular Component: mitochondrial membrane (GO:0031966);; Biological Process: cellular metabolic process (GO:0044237);; Biological Process: primary metabolic process (GO:0044238);; Cellular Component: respiratory chain complex I (GO:0045271);; Biological Process: organic substance metabolic process (GO:0071704);;	--	--	--	--	--	Uncharacterized protein At2g27730, mitochondrial OS=Arabidopsis thaliana OX=3702 GN=At2g27730 PE=1 SV=1	PREDICTED: uncharacterized protein At2g27730, mitochondrial [Cucumis sativus]
Csa1G267240	147.774	87.1897	96.0928	39.6197	33.4744	47.727	13.2757	16.894	15.4895	-1.45109	down	-2.92424	down	-1.46678	down	[G]	Carbohydrate transport and metabolism	Cellular Component: extracellular region (GO:0005576);; Cellular Component: cell wall (GO:0005618);; Biological Process: chitin catabolic process (GO:0006032);; Molecular Function: endochitinase activity (GO:0008843);; Biological Process: response to salt stress (GO:0009651);; Biological Process: response to abscisic acid (GO:0009737);; Biological Process: response to jasmonic acid (GO:0009753);;…	K01183|0|csv:101214175|K01183 chitinase [EC:3.2.1.14] | (RefSeq) chitotriosidase-1-like	Amino sugar and nucleotide sugar metabolism (ko00520)	[G]	Carbohydrate transport and metabolism	Glycosyl hydrolases family 18	Class V chitinase OS=Arabidopsis thaliana OX=3702 GN=ChiC PE=1 SV=1	PREDICTED: chitotriosidase-1-like [Cucumis sativus]
Csa1G269350	3.8821	8.9685	6.32992	1.9495	3.06303	2.71734	2.93063	2.1748	3.97045	-1.28739	down	-1.14515	down	0.15152	normal	--	--	Molecular Function: protein dimerization activity (GO:0046983);;	--	--	--	--	Helix-loop-helix DNA-binding domain	Transcription factor bHLH66 OS=Arabidopsis thaliana OX=3702 GN=BHLH66 PE=1 SV=1	PREDICTED: transcription factor bHLH82 [Cucumis sativus]
Csa1G277980	4.68079	10.1059	4.3228	0.712458	0.548071	0.873506	0.516507	0.798894	0.440808	-3.11671	down	-3.42826	down	--	--	--	--	--	--	--	--	--	--	--	--
Csa1G278500	3.63446	11.6289	4.06688	1.288	2.57216	1.11927	0.749941	1.11887	2.98376	-1.91728	down	-2.03233	down	-0.105276	normal	--	--	--	--	--	--	--	--	--	PREDICTED: glycine-rich cell wall structural protein 2 [Cucumis sativus]
Csa1G378520	1.66829	2.49516	0.92178	0.565459	0.770209	0.674385	0.447073	0.529374	1.02485	-1.47348	down	-2.07049	down	-0.59013	normal	[P]	Inorganic ion transport and metabolism	Molecular Function: secondary active sulfate transmembrane transporter activity (GO:0008271);; Biological Process: sulfate transport (GO:0008272);; Cellular Component: chloroplast (GO:0009507);; Cellular Component: integral component of membrane (GO:0016021);; Biological Process: transmembrane transport (GO:0055085);;	--	--	[P]	Inorganic ion transport and metabolism	Sulfate permease family	Probable sulfate transporter 3.5 OS=Arabidopsis thaliana OX=3702 GN=SULTR3;5 PE=2 SV=1	PREDICTED: probable sulfate transporter 3.5 [Cucumis sativus]
Csa1G384030	1.55052	2.00059	3.20152	0.655365	0.729602	1.53286	0.766338	0.203667	0.538247	-1.18122	down	-2.15211	down	--	--	--	--	Molecular Function: copper ion binding (GO:0005507);; Biological Process: copper ion transport (GO:0006825);;	--	--	[P]	Inorganic ion transport and metabolism	Heavy-metal-associated domain	Protein SODIUM POTASSIUM ROOT DEFECTIVE 1 OS=Arabidopsis thaliana OX=3702 GN=NAKR1 PE=1 SV=1	PREDICTED: uncharacterized protein LOC101204496 [Cucumis sativus]
Csa1G408710	1.27724	6.54417	5.51255	0.591161	1.00088	0.76671	0.699554	0.704635	0.86915	-2.6317	down	-2.84197	down	-0.19859	normal	--	--	Molecular Function: translation initiation factor activity (GO:0003743);; Cellular Component: mitochondrion (GO:0005739);; Biological Process: methylation-dependent chromatin silencing (GO:0006346);; Biological Process: translational initiation (GO:0006413);; Biological Process: cell-cell signaling (GO:0007267);; Biological Process: virus induced gene silencing (GO:0009616);; Biological Process: …	K11593|0|csv:101213206|K11593 eukaryotic translation initiation factor 2C | (RefSeq) protein argonaute PNH1	--	[J]	Translation, ribosomal structure and biogenesis	Piwi domain;; Mid domain of argonaute;; Argonaute linker 2 domain	Protein argonaute PNH1 OS=Oryza sativa subsp. japonica OX=39947 GN=PHN1 PE=2 SV=1	PREDICTED: protein argonaute PNH1 isoform X1 [Cucumis sativus]
Csa1G423100	9.4197	18.8341	17.7262	4.19195	4.88472	7.97584	3.54771	2.63928	4.39362	-1.40775	down	-2.16879	down	-0.752254	down	[MDT]	Cell wall/membrane/envelope biogenesis;; Cell cycle control, cell division, chromosome partitioning;; Signal transduction mechanisms	Molecular Function: ATP binding (GO:0005524);; Cellular Component: plasma membrane (GO:0005886);; Biological Process: toxin catabolic process (GO:0009407);; Biological Process: response to cyclopentenone (GO:0010583);; Molecular Function: ATPase activity (GO:0016887);;	--	--	[O]	Posttranslational modification, protein turnover, chaperones	Domain associated at C-terminal with AAA;; ATPase family associated with various cellular activities (AAA)	AAA-ATPase At5g57480 OS=Arabidopsis thaliana OX=3702 GN=At5g57480 PE=3 SV=1	hypothetical protein Csa_1G423100 [Cucumis sativus]
Csa1G423190	3.71695	14.2743	9.72739	1.84708	2.41672	3.29016	3.8799	3.00399	4.36817	-1.82121	down	-1.3344	down	0.496185	normal	--	--	Molecular Function: DNA binding (GO:0003677);; Molecular Function: transcription factor activity, sequence-specific DNA binding (GO:0003700);; Cellular Component: nucleus (GO:0005634);; Biological Process: transcription, DNA-templated (GO:0006351);; Biological Process: regulation of transcription, DNA-templated (GO:0006355);; Biological Process: photomorphogenesis (GO:0009640);; Biological Proces…	K09285|0|csv:101210453|K09285 AP2-like factor, ANT lineage | (RefSeq) AP2-like ethylene-responsive transcription factor AIL5	--	--	--	AP2 domain	AP2-like ethylene-responsive transcription factor AIL5 OS=Arabidopsis thaliana OX=3702 GN=AIL5 PE=2 SV=2	hypothetical protein Csa_1G423190 [Cucumis sativus]
Csa1G423340	3.30626	5.98451	3.97781	2.26076	1.94328	2.80209	1.84616	1.65464	1.75363	-0.903864	down	-1.38749	down	-0.476227	normal	[P]	Inorganic ion transport and metabolism	Molecular Function: nucleotide binding (GO:0000166);; Molecular Function: binding (GO:0005488);; Biological Process: cation transport (GO:0006812);; Molecular Function: hydrolase activity (GO:0016787);; Molecular Function: cation-transporting ATPase activity (GO:0019829);; Molecular Function: ion binding (GO:0043167);;	K01534|0|csv:101211188|K01534 Cd2+/Zn2+-exporting ATPase [EC:3.6.3.3 3.6.3.5] | (RefSeq) HMA4; cadmium/zinc-transporting ATPase HMA2-like	--	[P]	Inorganic ion transport and metabolism	Dynamin GTPase effector domain	Cadmium/zinc-transporting ATPase HMA2 OS=Arabidopsis thaliana OX=3702 GN=HMA2 PE=2 SV=1	cadmium/zinc-transporting ATPase HMA2-like [Cucumis sativus]
Csa1G478600	1.03172	6.15987	3.2189	1.19008	1.09532	1.19848	0.977391	0.654597	0.625009	-1.53947	down	-2.34077	down	-0.792085	normal	--	--	Biological Process: mitotic cell cycle (GO:0000278);; Biological Process: double-strand break repair via homologous recombination (GO:0000724);; Biological Process: DNA-dependent DNA replication (GO:0006261);; Biological Process: regulation of DNA replication (GO:0006275);; Biological Process: DNA methylation (GO:0006306);; Biological Process: chromatin silencing (GO:0006342);; Biological Process…	--	--	--	--	--	Protein DEFECTIVE IN MERISTEM SILENCING 3 OS=Arabidopsis thaliana OX=3702 GN=DMS3 PE=1 SV=1	hypothetical protein Csa_1G478600 [Cucumis sativus]
Csa1G479640	1.65415	2.94713	2.19332	1.3509	0.558631	1.26499	0.537418	0.890956	1.4967	-1.06972	down	-1.27316	down	-0.193628	normal	--	--	Molecular Function: transporter activity (GO:0005215);; Biological Process: oligopeptide transport (GO:0006857);; Cellular Component: integral component of membrane (GO:0016021);;	--	--	[E]	Amino acid transport and metabolism	POT family	Protein NRT1/ PTR FAMILY 2.3 OS=Arabidopsis thaliana OX=3702 GN=NPF2.3 PE=2 SV=1	hypothetical protein Csa_1G479640 [Cucumis sativus]
Csa1G479650	2.1214	4.71654	3.11851	1.08507	1.2544	1.38057	0.995302	0.90421	0.970187	-1.38151	down	-1.82845	down	--	--	--	--	Molecular Function: transporter activity (GO:0005215);; Biological Process: oligopeptide transport (GO:0006857);; Cellular Component: integral component of membrane (GO:0016021);;	--	--	[E]	Amino acid transport and metabolism	POT family	Protein NRT1/ PTR FAMILY 2.6 OS=Arabidopsis thaliana OX=3702 GN=NPF2.6 PE=2 SV=1	hypothetical protein Csa_1G479650 [Cucumis sativus]
Csa1G532370	13.9641	13.9559	11.8612	6.82759	9.03863	6.52265	3.65877	4.29159	4.8417	-0.816405	down	-1.69379	down	-0.868948	down	--	--	--	--	--	[O]	Posttranslational modification, protein turnover, chaperones	Ring finger domain;; RING-like zinc finger;; RING-H2 zinc finger domain;; Zinc finger, C3HC4 type (RING finger);; Zinc finger, C3HC4 type (RING finger);; Anaphase-promoting complex subunit 11 RING-H2 finger	RING-H2 finger protein ATL2 OS=Arabidopsis thaliana OX=3702 GN=ATL2 PE=2 SV=2	hypothetical protein Csa_1G532370 [Cucumis sativus]
Csa1G537410	2.06869	11.9632	9.70965	2.28544	5.13297	2.81732	4.24835	3.29431	3.82347	-1.19124	down	-1.11632	down	0.0871545	normal	--	--	Cellular Component: cytoplasmic vesicle (GO:0016023);; Molecular Function: hydrolase activity (GO:0016787);;	--	--	--	--	X8 domain	Glucan endo-1,3-beta-glucosidase 13 OS=Arabidopsis thaliana OX=3702 GN=At5g56590 PE=1 SV=1	hypothetical protein Csa_1G537410 [Cucumis sativus]
Csa1G538230	10.7084	16.8292	15.9155	8.42442	9.33854	9.19767	9.86485	7.9428	9.45543	-0.666794	down	-0.723746	down	-0.0480525	normal	--	--	Molecular Function: transcription factor activity, sequence-specific DNA binding (GO:0003700);; Cellular Component: nucleus (GO:0005634);; Biological Process: regulation of transcription, DNA-templated (GO:0006355);; Biological Process: sister chromatid cohesion (GO:0007062);; Biological Process: reciprocal meiotic recombination (GO:0007131);; Biological Process: cell adhesion (GO:0007155);; Biol…	K09338|0|csv:101211318|K09338 homeobox-leucine zipper protein | (RefSeq) homeobox-leucine zipper protein ATHB-14-like	--	--	--	START domain;; MEKHLA domain;; Homeobox domain	Homeobox-leucine zipper protein HOX32 OS=Oryza sativa subsp. japonica OX=39947 GN=HOX32 PE=2 SV=1	PREDICTED: homeobox-leucine zipper protein ATHB-14-like [Cucumis sativus]
Csa1G569240	13.7074	13.7944	11.7617	8.89602	6.84857	7.87625	7.52421	7.60197	6.08717	-0.717807	down	-0.943737	down	-0.218634	normal	[HR]	Coenzyme transport and metabolism;; General function prediction only	Molecular Function: epoxide hydrolase activity (GO:0004301);; Molecular Function: non-membrane spanning protein tyrosine kinase activity (GO:0004715);; Biological Process: metabolic process (GO:0008152);; Molecular Function: cis-stilbene-oxide hydrolase activity (GO:0033961);;	--	--	[I]	Lipid transport and metabolism	Alpha/beta hydrolase family;; alpha/beta hydrolase fold;; Serine aminopeptidase, S33	--	PREDICTED: bifunctional epoxide hydrolase 2 [Cucumis sativus]
Csa1G570190	3.78118	7.33016	5.6145	2.36791	2.43203	4.42484	2.7154	1.47405	2.79195	-0.71389	down	-1.39054	down	-0.669194	normal	[IQR]	Lipid transport and metabolism;; Secondary metabolites biosynthesis, transport and catabolism;; General function prediction only	Biological Process: very long-chain fatty acid metabolic process (GO:0000038);; Cellular Component: cytosol (GO:0005829);; Biological Process: folic acid-containing compound metabolic process (GO:0006760);; Biological Process: response to cold (GO:0009409);; Cellular Component: chloroplast (GO:0009507);; Molecular Function: oxidoreductase activity, acting on the CH-OH group of donors, NAD or NADP…	--	--	[R]	General function prediction only	short chain dehydrogenase;; Enoyl-(Acyl carrier protein) reductase;; KR domain;; NAD dependent epimerase/dehydratase family	NADPH-dependent pterin aldehyde reductase OS=Arabidopsis thaliana OX=3702 GN=At1g10310 PE=1 SV=1	hypothetical protein Csa_1G570190 [Cucumis sativus]
Csa1G574850	3.50562	6.8429	5.01562	1.92342	2.60052	2.66239	1.57958	1.71192	1.92126	-1.07189	down	-1.59858	down	-0.518313	normal	--	--	--	--	--	--	--	Cotton fibre expressed protein	--	hypothetical protein Csa_1G574850 [Cucumis sativus]
Csa1G574860	4.07858	9.0415	5.97036	4.10832	4.0037	4.20438	3.85195	3.56385	2.44264	-0.662746	down	-0.882013	down	-0.211298	normal	--	--	Biological Process: response to xenobiotic stimulus (GO:0009410);; Biological Process: photomorphogenesis (GO:0009640);; Biological Process: post-embryonic development (GO:0009791);; Biological Process: embryo development ending in seed dormancy (GO:0009793);; Biological Process: seed germination (GO:0009845);; Biological Process: determination of bilateral symmetry (GO:0009855);; Biological Proc…	K11699|0|csv:101214455|K11699 RNA-dependent RNA polymerase [EC:2.7.7.48] | (RefSeq) probable RNA-dependent RNA polymerase 5	--	[A]	RNA processing and modification	RNA dependent RNA polymerase	Probable RNA-dependent RNA polymerase 5 OS=Arabidopsis thaliana OX=3702 GN=RDR5 PE=2 SV=2	PREDICTED: probable RNA-dependent RNA polymerase 5 isoform X1 [Cucumis sativus]
Csa1G602540	2.82248	2.77632	1.76792	0.478931	1.36325	1.07194	0.329001	0.580784	0.832268	-1.32794	down	-2.13232	down	-0.796225	normal	[DPM]	Cell cycle control, cell division, chromosome partitioning;; Inorganic ion transport and metabolism;; Cell wall/membrane/envelope biogenesis	Molecular Function: copper ion binding (GO:0005507);; Cellular Component: extracellular region (GO:0005576);; Cellular Component: cell wall (GO:0005618);; Molecular Function: L-ascorbate oxidase activity (GO:0008447);; Biological Process: oxidation-reduction process (GO:0055114);;	K00423|0|csv:101206777|K00423 L-ascorbate oxidase [EC:1.10.3.3] | (RefSeq) L-ascorbate oxidase-like	Ascorbate and aldarate metabolism (ko00053)	[Q]	Secondary metabolites biosynthesis, transport and catabolism	Multicopper oxidase;; Multicopper oxidase;; Multicopper oxidase	L-ascorbate oxidase OS=Cucumis sativus OX=3659 PE=1 SV=1	PREDICTED: LOW QUALITY PROTEIN: L-ascorbate oxidase-like [Cucumis sativus]
Csa1G614140	9.09681	36.9507	28.8604	9.42522	7.88675	19.8492	5.93597	5.97237	6.19557	-0.980756	down	-2.08498	down	-1.09587	down	--	--	--	--	--	--	--	Viral movement protein (MP)	--	hypothetical protein Csa_1G614140 [Cucumis sativus]
Csa1G614640	3.48446	17.4369	11.2079	2.03763	3.06498	9.05506	0.959895	1.41003	2.75995	-1.15136	down	-2.68345	down	-1.52303	down	--	--	--	--	--	--	--	Viral movement protein (MP)	--	hypothetical protein Csa_1G614640 [Cucumis sativus]
Csa1G615150	13.7342	15.7177	11.1552	5.20653	5.84367	6.26557	3.09557	4.00148	4.13059	-1.21483	down	-1.90959	down	-0.687259	down	--	--	--	--	--	[G]	Carbohydrate transport and metabolism	Protein of unknown function, DUF604;; Fringe-like	--	PREDICTED: uncharacterized protein LOC101213989 [Cucumis sativus]
Csa1G629020	1.01012	6.76679	4.30959	0.398671	0.445473	0.739392	0.263792	0.15186	0.139087	-2.84681	down	-4.36533	down	--	--	--	--	--	--	--	--	--	Domain of unknown function (DUF296)	AT-hook motif nuclear-localized protein 17 OS=Arabidopsis thaliana OX=3702 GN=AHL17 PE=2 SV=1	PREDICTED: AT-hook motif nuclear-localized protein 17-like [Cucumis sativus]
Csa1G635920	3.68387	6.47228	3.33189	1.42901	1.32924	2.00809	0.544773	0.301561	0.574818	-1.47926	down	-3.27805	down	-1.79177	down	--	--	--	--	--	--	--	Fantastic Four meristem regulator	Protein FAF-like, chloroplastic OS=Arabidopsis thaliana OX=3702 GN=At5g22090 PE=2 SV=1	PREDICTED: protein FAF-like, chloroplastic [Cucumis sativus]
Csa1G660200	59.9128	43.9589	82.5748	14.9002	26.8162	33.0266	2.63271	10.4449	15.4206	-1.30843	down	-2.77176	down	-1.45302	down	--	--	Biological Process: defense response to nematode (GO:0002215);; Cellular Component: cell wall (GO:0005618);; Cellular Component: vacuolar membrane (GO:0005774);; Biological Process: carbohydrate metabolic process (GO:0005975);; Biological Process: defense response to fungus, incompatible interaction (GO:0009817);; Molecular Function: glucan endo-1,3-beta-D-glucosidase activity (GO:0042973);; Mole…	--	--	--	--	Glycosyl hydrolases family 17	Glucan endo-1,3-beta-glucosidase, basic isoform OS=Prunus persica OX=3760 GN=GNS1 PE=3 SV=1	hypothetical protein Csa_1G660200 [Cucumis sativus]
Csa1G701210	4.5418	2.98371	2.67314	1.64451	1.84421	2.32526	1.11763	1.14716	1.28359	-0.804975	down	-1.58677	down	-0.774918	down	[G]	Carbohydrate transport and metabolism	Molecular Function: 6-phosphofructokinase activity (GO:0003872);; Molecular Function: ATP binding (GO:0005524);; Cellular Component: cell wall (GO:0005618);; Cellular Component: 6-phosphofructokinase complex (GO:0005945);; Biological Process: fructose 6-phosphate metabolic process (GO:0006002);; Biological Process: acetyl-CoA biosynthetic process (GO:0006085);; Biological Process: glycolytic proc…	K00895|0|csv:101215219|K00895 diphosphate-dependent phosphofructokinase [EC:2.7.1.90] | (RefSeq) pyrophosphate--fructose 6-phosphate 1-phosphotransferase subunit beta-like	Glycolysis / Gluconeogenesis (ko00010);; Pentose phosphate pathway (ko00030);; Fructose and mannose metabolism (ko00051)	[G]	Carbohydrate transport and metabolism	Phosphofructokinase	Pyrophosphate--fructose 6-phosphate 1-phosphotransferase subunit beta OS=Ricinus communis OX=3988 GN=PFP-BETA PE=3 SV=1	PREDICTED: pyrophosphate--fructose 6-phosphate 1-phosphotransferase subunit beta-like [Cucumis sativus]
Csa2G000880	1.72646	4.81952	3.18291	1.35554	1.46972	1.85148	1.91511	1.14938	2.01513	-1.03358	down	-0.982038	down	0.0599847	normal	[I]	Lipid transport and metabolism	Molecular Function: nucleotide binding (GO:0000166);; Molecular Function: phosphogluconate dehydrogenase (decarboxylating) activity (GO:0004616);; Cellular Component: mitochondrion (GO:0005739);; Cellular Component: cytosol (GO:0005829);; Biological Process: pentose-phosphate shunt (GO:0006098);; Molecular Function: coenzyme binding (GO:0050662);;	--	--	[R]	General function prediction only	NAD binding domain of 6-phosphogluconate dehydrogenase;; NAD-binding of NADP-dependent 3-hydroxyisobutyrate dehydrogenase;; Shikimate / quinate 5-dehydrogenase	Probable 3-hydroxyisobutyrate dehydrogenase-like 1, mitochondrial OS=Arabidopsis thaliana OX=3702 GN=At4g29120 PE=1 SV=1	hypothetical protein Csa_2G000880 [Cucumis sativus]
Csa2G005950	34.1659	26.1205	40.5388	21.3439	18.0805	25.4565	17.4522	14.7471	13.2529	-0.678282	down	-1.2599	down	-0.573321	normal	--	--	Cellular Component: Golgi apparatus (GO:0005794);; Biological Process: nucleotide-sugar transport (GO:0015780);; Cellular Component: integral component of membrane (GO:0016021);; Cellular Component: cytoplasmic vesicle (GO:0016023);; Biological Process: transmembrane transport (GO:0055085);;	--	--	[GOU]	Carbohydrate transport and metabolism;; Posttranslational modification, protein turnover, chaperones;; Intracellular trafficking, secretion, and vesicular transport	Triose-phosphate Transporter family	GDP-fucose transporter 1 OS=Arabidopsis thaliana OX=3702 GN=GFT1 PE=1 SV=1	PREDICTED: GDP-mannose transporter GONST4 [Cucumis sativus]
Csa2G010380	51.4112	38.5073	53.5425	7.88258	15.2769	17.4125	0.591172	1.30137	3.94117	-1.81293	down	-4.67427	down	-2.85006	down	--	--	Molecular Function: ribonuclease activity (GO:0004540);; Cellular Component: extracellular region (GO:0005576);; Cellular Component: cell wall (GO:0005618);; Molecular Function: chitin binding (GO:0008061);; Biological Process: defense response to fungus, incompatible interaction (GO:0009817);; Biological Process: response to nitrate (GO:0010167);; Biological Process: nitrate transport (GO:001570…	--	--	[R]	General function prediction only	Barwin family	Pathogenesis-related protein P2 OS=Solanum lycopersicum OX=4081 PE=2 SV=1	PREDICTED: pathogenesis-related protein PR-4A-like [Cucumis sativus]
Csa2G011560	301.022	413.592	403.627	174.927	298.621	263.393	130.691	170.855	368.901	-0.594093	down	-0.844747	down	-0.239978	normal	[T]	Signal transduction mechanisms	Biological Process: activation of MAPKK activity (GO:0000186);; Molecular Function: MAP kinase kinase kinase activity (GO:0004709);; Molecular Function: ATP binding (GO:0005524);;	K08857|0|csv:101220901|K08857 NIMA (never in mitosis gene a)-related kinase 1/4/5 [EC:2.7.11.1] | (RefSeq) serine/threonine-protein kinase Nek2	--	[R]	General function prediction only	Protein kinase domain;; Protein tyrosine kinase	Serine/threonine-protein kinase Nek2 OS=Oryza sativa subsp. japonica OX=39947 GN=NEK2 PE=2 SV=1	hypothetical protein Csa_2G011560 [Cucumis sativus]
Csa2G028480	286.611	234.268	227.982	115.154	155.362	148.426	66.4932	78.0155	59.6536	-0.829172	down	-1.93483	down	-1.09834	down	--	--	Molecular Function: iron ion binding (GO:0005506);; Biological Process: response to wounding (GO:0009611);; Biological Process: response to abscisic acid (GO:0009737);; Biological Process: response to jasmonic acid (GO:0009753);; Biological Process: defense response to bacterium, incompatible interaction (GO:0009816);; Molecular Function: linoleate 13S-lipoxygenase activity (GO:0016165);; Biologi…	K15718|1.18143e-79|csv:101206327|K15718 linoleate 9S-lipoxygenase [EC:1.13.11.58] | (RefSeq) linoleate 9S-lipoxygenase 6-like	Linoleic acid metabolism (ko00591)	--	--	Lipoxygenase	Probable linoleate 9S-lipoxygenase 5 OS=Solanum tuberosum OX=4113 GN=LOX1.5 PE=2 SV=1	hypothetical protein Csa_2G028480 [Cucumis sativus]
Csa2G028490	282.431	207.947	207.827	96.9319	135.536	136.558	51.9759	40.4306	52.3761	-0.913746	down	-2.33458	down	-1.41331	down	--	--	Molecular Function: iron ion binding (GO:0005506);; Cellular Component: cytoplasm (GO:0005737);; Cellular Component: chloroplast (GO:0009507);; Biological Process: response to wounding (GO:0009611);; Molecular Function: linoleate 13S-lipoxygenase activity (GO:0016165);; Biological Process: oxylipin biosynthetic process (GO:0031408);; Biological Process: root development (GO:0048364);; Biological …	K15718|2.58364e-36|csv:101206327|K15718 linoleate 9S-lipoxygenase [EC:1.13.11.58] | (RefSeq) linoleate 9S-lipoxygenase 6-like	Linoleic acid metabolism (ko00591)	--	--	Lipoxygenase	Probable linoleate 9S-lipoxygenase 7 OS=Solanum tuberosum OX=4113 GN=LOX1.7 PE=2 SV=1	hypothetical protein Csa_2G028490 [Cucumis sativus]
Csa2G036650	0.379102	0.730865	0.388471	0.211421	0.146526	0.136854	0.193315	0.160651	0.178431	-1.52748	down	-1.49987	down	--	--	--	--	--	--	--	--	--	Domain of unknown function (DUF4220);; Protein of unknown function, DUF594	--	PREDICTED: uncharacterized protein LOC101214084 [Cucumis sativus]
Csa2G036680	2.96937	10.9677	4.10428	3.59583	2.96016	2.09813	1.85505	1.86321	1.18379	-1.02276	down	-1.91551	down	-0.885363	down	--	--	Molecular Function: adenosylmethionine decarboxylase activity (GO:0004014);; Biological Process: S-adenosylmethioninamine biosynthetic process (GO:0006557);; Biological Process: spermine biosynthetic process (GO:0006597);; Biological Process: spermidine biosynthetic process (GO:0008295);; Cellular Component: plastid (GO:0009536);;	K01611|0|csv:101215844|K01611 S-adenosylmethionine decarboxylase [EC:4.1.1.50] | (RefSeq) S-adenosylmethionine decarboxylase proenzyme-like	Cysteine and methionine metabolism (ko00270);; Arginine and proline metabolism (ko00330)	[T]	Signal transduction mechanisms	Adenosylmethionine decarboxylase	S-adenosylmethionine decarboxylase proenzyme OS=Oryza sativa subsp. japonica OX=39947 GN=SAMDC PE=2 SV=1	PREDICTED: S-adenosylmethionine decarboxylase proenzyme-like [Cucumis sativus]
Csa2G036690	0.70705	2.55314	0.972171	0.507636	0.654507	0.643562	0.710919	0.491231	0.430576	-1.17854	down	-1.39934	down	-0.212591	normal	--	--	Molecular Function: adenosylmethionine decarboxylase activity (GO:0004014);; Biological Process: spermine biosynthetic process (GO:0006597);; Biological Process: spermidine biosynthetic process (GO:0008295);;	K01611|3.64719e-18|cmo:103493485|K01611 S-adenosylmethionine decarboxylase [EC:4.1.1.50] | (RefSeq) S-adenosylmethionine decarboxylase proenzyme-like	Cysteine and methionine metabolism (ko00270);; Arginine and proline metabolism (ko00330)	--	--	S-adenosyl-l-methionine decarboxylase leader peptide	--	hypothetical protein Csa_2G036690 [Cucumis sativus]
Csa2G049930	0.870408	4.59094	1.8158	0.586164	0.447234	1.13965	0.237924	0.466088	0.187057	-1.6941	down	-3.03468	down	--	--	[V]	Defense mechanisms	Biological Process: drug transmembrane transport (GO:0006855);; Molecular Function: drug transmembrane transporter activity (GO:0015238);; Molecular Function: antiporter activity (GO:0015297);; Cellular Component: membrane (GO:0016020);;	K03327|0|csv:101214752|K03327 multidrug resistance protein, MATE family | (RefSeq) MATE efflux family protein 6-like	--	[R]	General function prediction only	MatE	Protein DETOXIFICATION 16 OS=Arabidopsis thaliana OX=3702 GN=DTX16 PE=2 SV=1	PREDICTED: MATE efflux family protein 6-like [Cucumis sativus]
Csa2G055570	8.56574	8.80114	5.19632	3.80714	3.92711	1.42604	3.46133	3.88544	2.90426	-1.2693	down	-1.18201	down	0.0949797	normal	--	--	Cellular Component: chloroplast (GO:0009507);;	--	--	--	--	--	--	hypothetical protein Csa_2G055570 [Cucumis sativus]
Csa2G061600	1.38462	5.74328	2.47436	1.18669	1.17695	1.19035	1.89692	1.66591	1.53825	-1.4001	down	-0.949538	down	0.458467	normal	--	--	Cellular Component: cytoplasm (GO:0005737);; Biological Process: pattern specification process (GO:0007389);; Biological Process: anatomical structure morphogenesis (GO:0009653);; Biological Process: protein metabolic process (GO:0019538);; Biological Process: single-organism developmental process (GO:0044767);; Biological Process: animal organ development (GO:0048513);;	--	--	[O]	Posttranslational modification, protein turnover, chaperones	Clp amino terminal domain, pathogenicity island component	Protein SMAX1-LIKE 4 OS=Arabidopsis thaliana OX=3702 GN=SMXL4 PE=1 SV=1	PREDICTED: uncharacterized protein LOC101222907 [Cucumis sativus]
Csa2G139290	1.4262	12.6888	4.57498	1.73562	2.56882	1.20546	2.58414	2.27744	2.91162	-1.71006	down	-1.29863	down	0.422204	normal	--	--	Molecular Function: hydrolase activity (GO:0016787);;	--	--	--	--	X8 domain	PLASMODESMATA CALLOSE-BINDING PROTEIN 3 OS=Arabidopsis thaliana OX=3702 GN=PDCB3 PE=1 SV=1	PREDICTED: PLASMODESMATA CALLOSE-BINDING PROTEIN 3 [Cucumis sativus]
Csa2G171960	74.3554	35.9796	40.6484	22.8609	20.5494	26.6932	1.95497	3.03481	2.60543	-1.11353	down	-4.43661	down	-3.31736	down	[S]	Function unknown	Biological Process: lipid biosynthetic process (GO:0008610);; Molecular Function: cyclopropane-fatty-acyl-phospholipid synthase activity (GO:0008825);; Molecular Function: oxidoreductase activity (GO:0016491);; Biological Process: methylation (GO:0032259);; Biological Process: oxidation-reduction process (GO:0055114);;	K00574|0|csv:105434591|K00574 cyclopropane-fatty-acyl-phospholipid synthase [EC:2.1.1.79] | (RefSeq) uncharacterized LOC105434591	--	--	--	Mycolic acid cyclopropane synthetase;; Methyltransferase domain;; Methyltransferase domain;; Methyltransferase domain;; Methyltransferase domain;; Methyltransferase domain;; Methyltransferase small domain;; Methyltransferase domain;; tRNA (adenine(22)-N(1))-methyltransferase;; Protein-L-isoaspartate(D-aspartate) O-methyltransferase (PCMT);; RNA cap guanine-N2 methyltransferase;; Nodulation protei…	Probable (S)-tetrahydroprotoberberine N-methyltransferase 2 OS=Papaver bracteatum OX=215227 PE=2 SV=1	PREDICTED: uncharacterized protein LOC105434591 [Cucumis sativus]
Csa2G176690	21.7309	15.9874	21.8862	6.93639	11.5207	17.429	1.34198	1.81595	1.45326	-0.722924	down	-3.73028	down	-2.99989	down	--	--	--	--	--	--	--	--	--	hypothetical protein Csa_2G176690 [Cucumis sativus]
Csa2G176700	81.634	58.0984	63.0308	39.5719	44.0665	45.6366	23.1054	29.4766	28.3328	-0.642294	down	-1.38859	down	-0.738749	down	--	--	Biological Process: developmental process involved in reproduction (GO:0003006);; Biological Process: circadian rhythm (GO:0007623);; Biological Process: response to salt stress (GO:0009651);; Biological Process: response to ethylene (GO:0009723);; Biological Process: post-embryonic development (GO:0009791);; Biological Process: cellular component organization (GO:0016043);; Biological Process: s…	--	--	--	--	--	--	uncharacterized protein LOC110026973 [Phalaenopsis equestris]
Csa2G193350	0.665125	1.50426	0.8008	0.481104	0.206967	0.279534	0.334245	0.193158	0.091511	-1.55579	down	-2.249	down	--	--	--	--	--	--	--	--	--	Sieve element occlusion N-terminus;; Sieve element occlusion C-terminus	Protein SIEVE ELEMENT OCCLUSION B OS=Arabidopsis thaliana OX=3702 GN=SEOB PE=1 SV=1	PREDICTED: uncharacterized protein LOC101217067 [Cucumis sativus]
Csa2G196900	3.95369	10.8581	5.08061	2.57218	3.90029	3.94524	4.149	3.82361	4.1985	-0.911657	down	-0.758712	down	0.161172	normal	--	--	--	--	--	--	--	Sieve element occlusion N-terminus;; Sieve element occlusion C-terminus	Protein SIEVE ELEMENT OCCLUSION B OS=Arabidopsis thaliana OX=3702 GN=SEOB PE=1 SV=1	PREDICTED: uncharacterized protein LOC101203350 [Cucumis sativus]
Csa2G199900	1.65024	4.46242	2.94465	1.35593	1.37491	1.31723	0.693886	1.11051	0.56475	-1.1312	down	-1.96887	down	-0.830127	down	--	--	--	--	--	--	--	Sieve element occlusion N-terminus;; Sieve element occlusion C-terminus	Protein SIEVE ELEMENT OCCLUSION B OS=Arabidopsis thaliana OX=3702 GN=SEOB PE=1 SV=1	PREDICTED: uncharacterized protein LOC101203597 [Cucumis sativus]
Csa2G222070	5.41317	10.9756	8.46413	3.52626	3.35603	4.88249	4.26708	3.98889	2.63388	-1.04919	down	-1.22248	down	-0.166104	normal	--	--	Biological Process: guard cell differentiation (GO:0010052);;	--	--	--	--	Epidermal patterning factor proteins	EPIDERMAL PATTERNING FACTOR-like protein 4 OS=Arabidopsis thaliana OX=3702 GN=EPFL4 PE=1 SV=1	PREDICTED: EPIDERMAL PATTERNING FACTOR-like protein 5 [Cucumis sativus]
Csa2G234600	5.21421	10.2576	6.92195	5.09088	4.01253	4.36505	4.67864	3.62683	3.75275	-0.704811	down	-0.928245	down	-0.215596	normal	[O]	Posttranslational modification, protein turnover, chaperones	Biological Process: protein peptidyl-prolyl isomerization (GO:0000413);; Molecular Function: peptidyl-prolyl cis-trans isomerase activity (GO:0003755);; Cellular Component: cytosol (GO:0005829);; Biological Process: protein folding (GO:0006457);; Biological Process: vegetative phase change (GO:0010050);; Biological Process: floral meristem determinacy (GO:0010582);;	K05864|0|csv:101207288|K05864 peptidyl-prolyl isomerase D [EC:5.2.1.8] | (RefSeq) peptidyl-prolyl cis-trans isomerase CYP40	--	[O]	Posttranslational modification, protein turnover, chaperones	Cyclophilin type peptidyl-prolyl cis-trans isomerase/CLD;; Tetratricopeptide repeat;; Tetratricopeptide repeat;; TPR repeat;; Tetratricopeptide repeat;; Tetratricopeptide repeat;; Tetratricopeptide repeat	Peptidyl-prolyl cis-trans isomerase CYP40 OS=Arabidopsis thaliana OX=3702 GN=CYP40 PE=2 SV=1	PREDICTED: peptidyl-prolyl cis-trans isomerase CYP40 [Cucumis sativus]
Csa2G248710	6.98666	6.06588	4.35719	2.46113	1.57484	4.2404	0.127361	0.234902	0.104721	-1.06372	down	-5.12307	down	-4.05336	down	[C]	Energy production and conversion	Molecular Function: DNA binding (GO:0003677);; Molecular Function: transcription factor activity, sequence-specific DNA binding (GO:0003700);; Molecular Function: 3-oxoacyl-[acyl-carrier-protein] reductase (NADPH) activity (GO:0004316);; Cellular Component: nucleus (GO:0005634);; Biological Process: regulation of transcription, DNA-templated (GO:0006355);; Biological Process: oxidation-reduction …	--	--	[Q]	Secondary metabolites biosynthesis, transport and catabolism	short chain dehydrogenase;; Enoyl-(Acyl carrier protein) reductase;; Fungal family of unknown function (DUF1776);; KR domain;; NAD dependent epimerase/dehydratase family	11-beta-hydroxysteroid dehydrogenase-like 3 OS=Arabidopsis thaliana OX=3702 GN=HSD3 PE=3 SV=1	PREDICTED: NADPH-dependent 1-acyldihydroxyacetone phosphate reductase-like [Cucumis sativus]
Csa2G252100	1.87071	1.15833	80.9152	4.16285	0	0	0	0	6.95387	-4.26788	down	-3.65178	down	--	--	--	--	Molecular Function: endonuclease activity (GO:0004519);;	--	--	--	--	--	--	hypothetical protein Csa_2G252100 [Cucumis sativus]
Csa2G264060	3.96574	7.64442	4.36825	1.98063	1.85193	2.21528	2.95852	2.54419	3.2567	-1.36954	down	-0.913574	down	0.463562	normal	--	--	Biological Process: defense response (GO:0006952);; Biological Process: lignan biosynthetic process (GO:0009807);;	--	--	--	--	Dirigent-like protein	Dirigent protein 23 OS=Arabidopsis thaliana OX=3702 GN=DIR23 PE=2 SV=1	PREDICTED: dirigent protein 23 [Cucumis sativus]
Csa2G285340	0.633221	1.81562	1.64676	0.179102	0.506233	0.438408	0.537682	0.351451	0.704521	-1.83312	down	-1.39848	down	--	--	--	--	Biological Process: transcription, DNA-templated (GO:0006351);; Biological Process: regulation of metabolic process (GO:0019222);; Biological Process: single-organism cellular process (GO:0044763);; Biological Process: regulation of cellular process (GO:0050794);;	--	--	--	--	GRAS domain family	Protein SHORT-ROOT OS=Arabidopsis thaliana OX=3702 GN=SHR PE=1 SV=1	PREDICTED: protein SHORT-ROOT-like [Cucumis sativus]
Csa2G285940	6.55112	18.2819	15.1757	3.1361	4.09465	7.69675	1.46064	1.84225	1.17434	-1.39393	down	-3.19393	down	-1.79218	down	--	--	--	--	--	--	--	--	--	PREDICTED: uncharacterized protein LOC101205218 [Cucumis sativus]
Csa2G286450	2.02406	4.98428	3.86164	1.78556	1.21634	2.25146	1.68906	1.34394	2.17631	-1.01924	down	-1.10908	down	-0.0813917	normal	[T]	Signal transduction mechanisms	Molecular Function: metal ion binding (GO:0046872);;	K13448|7.3648e-113|csv:101205694|K13448 calcium-binding protein CML | (RefSeq) probable calcium-binding protein CML32	Plant-pathogen interaction (ko04626)	[T]	Signal transduction mechanisms	EF hand;; EF-hand domain pair;; EF hand;; EF-hand domain;; EF-hand domain pair;; Secreted protein acidic and rich in cysteine Ca binding region;; Cytoskeletal-regulatory complex EF hand	Calmodulin-like protein 1 OS=Arabidopsis thaliana OX=3702 GN=CML1 PE=2 SV=1	PREDICTED: probable calcium-binding protein CML32 [Cucumis sativus]
Csa2G287090	2.77573	5.2749	3.54749	1.94064	1.91656	1.59193	1.56463	1.58041	1.39317	-1.06452	down	-1.40034	down	-0.327696	normal	[G]	Carbohydrate transport and metabolism	--	--	--	--	--	Protein of unknown function, DUF547;; Leucine-zipper of ternary complex factor MIP1	--	PREDICTED: uncharacterized protein LOC101212736 isoform X1 [Cucumis sativus]
Csa2G287110	0.81409	3.55048	1.58721	0.789636	0.774228	0.461124	0.830103	0.870052	0.586195	-1.46596	down	-1.35562	down	0.118337	normal	--	--	--	--	--	[K]	Transcription	Associated with HOX;; Homeobox KN domain;; Homeobox domain	BEL1-like homeodomain protein 2 OS=Arabidopsis thaliana OX=3702 GN=BLH2 PE=1 SV=3	PREDICTED: BEL1-like homeodomain protein 2 [Cucumis sativus]
Csa2G298280	6.56087	30.1092	16.7107	7.15522	5.20483	7.9599	4.54209	1.46455	4.56208	-1.35806	down	-2.37804	down	-1.01128	down	[QV]	Secondary metabolites biosynthesis, transport and catabolism;; Defense mechanisms	Molecular Function: iron ion binding (GO:0005506);; Molecular Function: electron carrier activity (GO:0009055);; Biological Process: regulation of meristem growth (GO:0010075);; Biological Process: inflorescence development (GO:0010229);; Molecular Function: oxygen binding (GO:0019825);; Molecular Function: heme binding (GO:0020037);; Molecular Function: flavonoid 3',5'-hydroxylase activity (GO:0…	K20619|0|csv:101214099|K20619 cytochrome P450 family 78 subfamily A | (RefSeq) cytochrome P450 78A7	--	[Q]	Secondary metabolites biosynthesis, transport and catabolism	Cytochrome P450	Cytochrome P450 78A7 OS=Arabidopsis thaliana OX=3702 GN=CYP78A7 PE=2 SV=1	PREDICTED: cytochrome P450 78A7 [Cucumis sativus]
Csa2G354710	5.57047	9.9339	8.8009	4.048	4.81758	6.14963	2.35779	2.84652	5.40159	-0.67469	down	-1.24675	down	-0.562982	normal	--	--	Molecular Function: calmodulin binding (GO:0005516);; Cellular Component: nucleus (GO:0005634);; Cellular Component: plasma membrane (GO:0005886);;	--	--	[T]	Signal transduction mechanisms	Tetratricopeptide repeat;; Tetratricopeptide repeat;; Tetratricopeptide repeat;; Tetratricopeptide repeat;; TPR repeat	Protein NPGR1 OS=Arabidopsis thaliana OX=3702 GN=NPGR1 PE=1 SV=1	PREDICTED: tetratricopeptide repeat protein 7B [Cucumis sativus]
Csa2G356090	15.4165	43.8203	20.4706	13.9781	17.1926	9.94174	16.313	10.1494	17.3755	-0.924371	down	-0.907845	down	0.0257719	normal	[K]	Transcription	--	--	--	--	--	Leucine rich repeat;; Leucine Rich Repeat	Uncharacterized protein At4g06744 OS=Arabidopsis thaliana OX=3702 GN=At4g06744 PE=2 SV=1	PREDICTED: uncharacterized protein At4g06744-like [Cucumis sativus]
Csa2G356690	1.08272	5.32909	2.58246	0.722464	0.656646	0.705284	0.866909	0.652492	0.642843	-2.06027	down	-2.08339	down	-0.0146636	normal	--	--	Molecular Function: DNA binding (GO:0003677);; Biological Process: response to stress (GO:0006950);; Biological Process: cellular process (GO:0009987);;	K09419|0|csv:101218781|K09419 heat shock transcription factor, other eukaryote | (RefSeq) heat stress transcription factor B-4	--	[K]	Transcription	HSF-type DNA-binding	Heat stress transcription factor B-4 OS=Arabidopsis thaliana OX=3702 GN=HSFB4 PE=2 SV=1	PREDICTED: heat stress transcription factor B-4 [Cucumis sativus]
Csa2G357860	10.301	22.7489	17.1987	8.57239	8.38721	12.7796	6.26455	4.15956	5.32622	-0.732978	down	-1.71914	down	-0.97834	down	--	--	--	--	--	[T]	Signal transduction mechanisms	EF hand;; EF-hand domain;; EF-hand domain pair;; EF-hand domain pair;; EF hand	Probable calcium-binding protein CML17 OS=Oryza sativa subsp. japonica OX=39947 GN=CML17 PE=2 SV=1	hypothetical protein Csa_2G357860 [Cucumis sativus]
Csa2G358880	1.30973	2.15455	1.36819	0.462648	0.541109	0.852568	0.386823	0.170333	0.478683	-1.31415	down	-2.17422	down	--	--	--	--	Molecular Function: binding (GO:0005488);; Molecular Function: transferase activity, transferring phosphorus-containing groups (GO:0016772);;	--	--	[T]	Signal transduction mechanisms	EF hand;; EF-hand domain pair;; EF-hand domain;; EF hand;; EF-hand domain pair	Probable calcium-binding protein CML36 OS=Arabidopsis thaliana OX=3702 GN=CML36 PE=2 SV=1	PREDICTED: probable calcium-binding protein CML36 [Cucumis sativus]
Csa2G360720	0.850906	1.85139	1.77152	0.397338	1.07276	0.462916	0.572023	0.637308	0.662917	-1.18025	down	-1.28616	down	--	--	--	--	--	--	--	--	--	Dof domain, zinc finger	Dof zinc finger protein DOF3.4 OS=Arabidopsis thaliana OX=3702 GN=DOF3.4 PE=1 SV=2	PREDICTED: dof zinc finger protein DOF1.6-like [Cucumis sativus]
Csa2G361860	1.18943	2.07836	0.982828	0.280299	0.526225	0.60185	0.410071	0.185011	0.148463	-1.58117	down	-2.50908	down	--	--	--	--	--	--	--	--	--	--	Transcription factor bHLH110 OS=Arabidopsis thaliana OX=3702 GN=BHLH110 PE=2 SV=2	PREDICTED: transcription factor bHLH110-like isoform X1 [Cucumis sativus]
Csa2G369230	13.064	9.69156	14.648	6.07356	5.00021	7.87279	10.0287	6.23823	8.04924	-0.973411	down	-0.69466	down	0.286627	normal	[V]	Defense mechanisms	Cellular Component: plasma membrane (GO:0005886);; Biological Process: drug transmembrane transport (GO:0006855);; Biological Process: fruit ripening (GO:0009835);; Molecular Function: drug transmembrane transporter activity (GO:0015238);; Molecular Function: antiporter activity (GO:0015297);; Cellular Component: membrane (GO:0016020);;	K03327|0|csv:101218581|K03327 multidrug resistance protein, MATE family | (RefSeq) protein TRANSPARENT TESTA 12	--	[R]	General function prediction only	MatE	Protein DETOXIFICATION 27 OS=Arabidopsis thaliana OX=3702 GN=DTX27 PE=2 SV=1	PREDICTED: protein TRANSPARENT TESTA 12 [Cucumis sativus]
Csa2G372760	0.60714	0.689588	1.14652	0.182256	0.121011	0.575683	0.069486	0.025385	0	-1.42022	down	-4.33304	down	--	--	[V]	Defense mechanisms	Biological Process: regulation of animal organ formation (GO:0003156);; Cellular Component: plasma membrane (GO:0005886);; Biological Process: drug transmembrane transport (GO:0006855);; Biological Process: response to nematode (GO:0009624);; Molecular Function: drug transmembrane transporter activity (GO:0015238);; Molecular Function: antiporter activity (GO:0015297);; Cellular Component: Golgi …	K03327|0|csv:101207119|K03327 multidrug resistance protein, MATE family | (RefSeq) MATE efflux family protein 5	--	[R]	General function prediction only	MatE	Protein DETOXIFICATION 48 OS=Arabidopsis thaliana OX=3702 GN=DTX48 PE=2 SV=1	PREDICTED: MATE efflux family protein 5 [Cucumis sativus]
Csa2G380050	3.9909	18.1677	9.32523	2.32378	4.16484	5.05364	3.62071	3.03553	4.12674	-1.4181	down	-1.57772	down	-0.150256	normal	--	--	Cellular Component: intracellular (GO:0005622);; Molecular Function: zinc ion binding (GO:0008270);; Biological Process: plant-type cell wall organization (GO:0009664);; Biological Process: cell wall modification (GO:0042545);;	--	--	[R]	General function prediction only	Zn-finger in Ran binding protein and others	--	hypothetical protein Csa_2G380050 [Cucumis sativus]
Csa2G381810	13.466	15.6168	15.0982	9.55484	9.22893	9.81569	6.38019	6.79735	7.35364	-0.637056	down	-1.1554	down	-0.510113	normal	--	--	Molecular Function: transcription cofactor activity (GO:0003712);; Biological Process: regulation of transcription, DNA-templated (GO:0006355);;	--	--	--	--	--	--	hypothetical protein Csa_2G381810 [Cucumis sativus]
Csa2G381830	25.8285	30.186	28.2239	18.23	19.2936	16.3454	11.867	11.8924	11.7486	-0.617174	down	-1.28997	down	-0.66438	down	--	--	Molecular Function: transcription cofactor activity (GO:0003712);; Biological Process: regulation of transcription, DNA-templated (GO:0006355);;	--	--	--	--	--	--	hypothetical protein Csa_2G381830 [Cucumis sativus]
Csa2G429010	18.8875	9.64221	8.19997	5.41717	3.80111	5.97954	0.734618	1.19742	1.17468	-1.27303	down	-3.62083	down	-2.34198	down	--	--	Molecular Function: transferase activity, transferring acyl groups other than amino-acyl groups (GO:0016747);;	K19861|0|csv:101208513|K19861 benzyl alcohol O-benzoyltransferase [EC:2.3.1.196 2.3.1.232] | (RefSeq) benzyl alcohol O-benzoyltransferase-like	--	--	--	Transferase family	Benzyl alcohol O-benzoyltransferase OS=Nicotiana tabacum OX=4097 GN=HSR201 PE=1 SV=1	PREDICTED: benzyl alcohol O-benzoyltransferase-like [Cucumis sativus]
Csa2G432780	18.5996	23.5406	23.0686	11.9022	14.9019	14.8465	6.08494	9.28887	16.8954	-0.618778	down	-1.06163	down	-0.433516	normal	[I]	Lipid transport and metabolism	Biological Process: vitamin E biosynthetic process (GO:0010189);; Biological Process: methylation (GO:0032259);; Molecular Function: tocopherol O-methyltransferase activity (GO:0050342);;	K05928|0|csv:101205148|K05928 tocopherol O-methyltransferase [EC:2.1.1.95] | (RefSeq) tocopherol O-methyltransferase, chloroplastic	Ubiquinone and other terpenoid-quinone biosynthesis (ko00130)	[IR]	Lipid transport and metabolism;; General function prediction only	Methyltransferase domain;; Methyltransferase domain;; Mycolic acid cyclopropane synthetase;; Methyltransferase domain;; Methyltransferase domain;; Methyltransferase domain;; ubiE/COQ5 methyltransferase family	Tocopherol O-methyltransferase, chloroplastic OS=Arabidopsis thaliana OX=3702 GN=VTE4 PE=1 SV=2	PREDICTED: tocopherol O-methyltransferase, chloroplastic [Cucumis sativus]
Csa3G000180	23.4651	13.0684	17.4138	10.7807	10.6709	13.3459	5.80221	4.99057	5.14305	-0.61597	down	-1.78599	down	-1.1627	down	--	--	Cellular Component: chloroplast (GO:0009507);; Molecular Function: auxin:proton symporter activity (GO:0009672);; Biological Process: auxin polar transport (GO:0009926);; Biological Process: para-aminobenzoic acid metabolic process (GO:0046482);; Molecular Function: organic cyclic compound binding (GO:0097159);; Molecular Function: heterocyclic compound binding (GO:1901363);;	--	--	[S]	Function unknown	Membrane transport protein	Protein PIN-LIKES 5 OS=Arabidopsis thaliana OX=3702 GN=PILS5 PE=2 SV=1	PREDICTED: uncharacterized transporter YBR287W-like [Cucumis sativus]
Csa3G00090	30.9062	1.12099	26.5322	1.30816	13.658	0.857652	1.42137	1.73589	1.06438	-1.89048	down	-3.8595	down	-1.95676	down	[I]	Lipid transport and metabolism	Molecular Function: diacylglycerol O-acyltransferase activity (GO:0004144);; Biological Process: metabolic process (GO:0008152);;	K14457|0|cmo:103490635|K14457 2-acylglycerol O-acyltransferase 2 [EC:2.3.1.22] | (RefSeq) diacylglycerol O-acyltransferase 2	Glycerolipid metabolism (ko00561)	[I]	Lipid transport and metabolism	Diacylglycerol acyltransferase;; Acyltransferase	Diacylglycerol O-acyltransferase 2D OS=Glycine max OX=3847 GN=DGAT2D PE=1 SV=1	PREDICTED: diacylglycerol O-acyltransferase 2 isoform X1 [Cucumis melo]
Csa3G002610	4.79581	8.02386	9.96236	2.1842	2.43953	3.30803	1.315	0.735603	1.07581	-1.51399	down	-2.86951	down	-1.3464	down	--	--	Molecular Function: protein binding (GO:0005515);; Cellular Component: nucleus (GO:0005634);; Biological Process: photoperiodism (GO:0009648);; Biological Process: positive regulation of flower development (GO:0009911);; Biological Process: response to organic substance (GO:0010033);; Biological Process: single-organism process (GO:0044699);; Biological Process: positive regulation of transcripti…	--	--	--	--	bZIP transcription factor;; Basic region leucine zipper	Protein FD OS=Arabidopsis thaliana OX=3702 GN=FD PE=1 SV=1	hypothetical protein Csa_3G002610 [Cucumis sativus]
Csa3G009550	3.50548	10.8387	6.83284	1.44918	1.8256	3.24713	0.160848	0.221832	0	-1.66798	down	-5.63871	down	-3.96447	down	--	--	--	--	--	--	--	--	--	glycine-rich protein-1 [Cucumis sativus]
Csa3G011070	5.76458	2.66874	4.79192	1.29368	1.97414	2.74006	0.468755	0.352428	1.03047	-1.13641	down	-2.87695	down	--	--	--	--	--	--	--	--	--	--	--	PREDICTED: glycine-rich cell wall structural protein 2-like [Cucumis sativus]
Csa3G011080	0.993774	1.7384	1.97378	0.450626	0.197938	0.319734	0.42004	0.215296	0.039706	-2.21453	down	-2.75969	down	--	--	--	--	Molecular Function: hydrolase activity (GO:0016787);;	--	--	--	--	--	--	--
Csa3G026690	27.3861	104.345	29.0025	2.32969	4.87395	7.92199	0.116752	0.293874	0.667095	-3.37615	down	-7.18198	down	-3.79614	down	--	--	--	--	--	--	--	Hydrophobic seed protein	Putative lipid-binding protein AIR1B OS=Arabidopsis thaliana OX=3702 GN=AIR1B PE=3 SV=1	hypothetical protein Csa_3G026690 [Cucumis sativus]
Csa3G027190	30.8947	52.7251	19.8149	3.97937	6.77153	9.2623	0	0.519565	0.565724	-2.3497	down	-6.55083	down	-4.1924	down	--	--	Biological Process: response to auxin (GO:0009733);; Biological Process: lateral root morphogenesis (GO:0010102);; Biological Process: developmental growth (GO:0048589);; Biological Process: root hair cell differentiation (GO:0048765);;	--	--	--	--	Hydrophobic seed protein	Putative lipid-binding protein AIR1B OS=Arabidopsis thaliana OX=3702 GN=AIR1B PE=3 SV=1	PREDICTED: putative lipid-binding protein AIR1B [Cucumis sativus]
Csa3G033230	1.36515	1.56889	1.93219	0.058487	0.100483	0.046259	0.114371	0.166659	0.130076	-4.34912	down	-3.5983	down	--	--	[F]	Nucleotide transport and metabolism	Molecular Function: adenine phosphoribosyltransferase activity (GO:0003999);; Cellular Component: cytosol (GO:0005829);; Biological Process: adenine salvage (GO:0006168);; Biological Process: nucleoside metabolic process (GO:0009116);;	K00759|2.47936e-152|csv:101218731|K00759 adenine phosphoribosyltransferase [EC:2.4.2.7] | (RefSeq) adenine phosphoribosyltransferase 3	Purine metabolism (ko00230)	[F]	Nucleotide transport and metabolism	Phosphoribosyl transferase domain	Adenine phosphoribosyltransferase 3 OS=Arabidopsis thaliana OX=3702 GN=APT3 PE=1 SV=1	PREDICTED: adenine phosphoribosyltransferase 3 [Cucumis sativus]
Csa3G036480	74.2519	47.6785	45.6725	27.5342	28.7657	32.7114	13.5289	14.722	12.2772	-0.908754	down	-2.11116	down	-1.19586	down	[I]	Lipid transport and metabolism	Biological Process: RNA splicing, via endonucleolytic cleavage and ligation (GO:0000394);; Molecular Function: iron ion binding (GO:0005506);; Biological Process: acetyl-CoA metabolic process (GO:0006084);; Biological Process: fatty acid biosynthetic process (GO:0006633);; Biological Process: calcium ion transport (GO:0006816);; Biological Process: Golgi organization (GO:0007030);; Molecular Func…	K14423|0|csv:101211692|K14423 4,4-dimethyl-9beta,19-cyclopropylsterol-4alpha-methyl oxidase [EC:1.14.13.72] | (RefSeq) methylsterol monooxygenase 1-2-like	Steroid biosynthesis (ko00100)	[I]	Lipid transport and metabolism	Fatty acid hydroxylase superfamily	Methylsterol monooxygenase 1-2 OS=Arabidopsis thaliana OX=3702 GN=SMO1-2 PE=2 SV=1	PREDICTED: methylsterol monooxygenase 1-2-like [Cucumis sativus]
Csa3G036560	7.35309	8.39882	6.42515	5.44319	5.82115	4.81193	4.40136	6.18644	4.65099	-0.590077	down	-0.711562	down	-0.114077	normal	[R]	General function prediction only	Molecular Function: bile acid:sodium symporter activity (GO:0008508);; Biological Process: response to wounding (GO:0009611);; Biological Process: response to jasmonic acid (GO:0009753);; Cellular Component: chloroplast envelope (GO:0009941);; Cellular Component: membrane (GO:0016020);; Cellular Component: integral component of membrane (GO:0016021);; Biological Process: glucosinolate biosyntheti…	--	--	[P]	Inorganic ion transport and metabolism	Sodium Bile acid symporter family	Probable sodium/metabolite cotransporter BASS6, chloroplastic OS=Arabidopsis thaliana OX=3702 GN=BASS6 PE=2 SV=1	PREDICTED: probable sodium/metabolite cotransporter BASS5, chloroplastic isoform X1 [Cucumis sativus]
Csa3G078280	1.41883	4.13641	3.65688	1.22503	1.29542	1.4991	0.842199	1.1723	1.56893	-1.15037	down	-1.39261	down	-0.233321	normal	--	--	--	--	--	--	--	Plastocyanin-like domain	Early nodulin-like protein 3 OS=Arabidopsis thaliana OX=3702 GN=At5g25090 PE=1 SV=2	PREDICTED: early nodulin-like protein 3 [Cucumis sativus]
Csa3G099720	2.13948	5.0231	3.46373	1.04937	1.46307	1.61885	1.09008	0.946015	2.58808	-1.33701	down	-1.2517	down	0.0941691	normal	[I]	Lipid transport and metabolism	Cellular Component: peroxisomal matrix (GO:0005782);; Cellular Component: plasma membrane (GO:0005886);; Cellular Component: chloroplast (GO:0009507);; Molecular Function: disulfide oxidoreductase activity (GO:0015036);; Molecular Function: monodehydroascorbate reductase (NADH) activity (GO:0016656);; Biological Process: electron transport chain (GO:0022900);; Biological Process: cell redox homeo…	K08232|0|csv:101206557|K08232 monodehydroascorbate reductase (NADH) [EC:1.6.5.4] | (RefSeq) monodehydroascorbate reductase-like	Ascorbate and aldarate metabolism (ko00053)	[R]	General function prediction only	Pyridine nucleotide-disulphide oxidoreductase;; Pyridine nucleotide-disulphide oxidoreductase	Monodehydroascorbate reductase 1, peroxisomal OS=Arabidopsis thaliana OX=3702 GN=MDAR1 PE=1 SV=1	PREDICTED: monodehydroascorbate reductase-like [Cucumis sativus]
Csa3G115050	8.69812	6.22504	7.56573	4.6758	3.46012	5.57726	2.85273	1.35781	2.44342	-0.660143	down	-1.93777	down	-1.26927	down	--	--	Cellular Component: extracellular region (GO:0005576);; Molecular Function: lyase activity (GO:0016829);;	K18195|0|csv:101215252|K18195 rhamnogalacturonan endolyase [EC:4.2.2.23] | (RefSeq) probable rhamnogalacturonate lyase B	--	--	--	Rhamnogalacturonate lyase family;; Polysaccharide lyase family 4, domain III;; Polysaccharide lyase family 4, domain II	--	PREDICTED: probable rhamnogalacturonate lyase B [Cucumis sativus]
Csa3G116700	6.20165	14.8628	10.9182	4.78486	5.92117	6.524	5.1725	5.38438	6.26577	-0.865411	down	-0.970772	down	-0.0966264	normal	--	--	Molecular Function: transcription factor activity, sequence-specific DNA binding (GO:0003700);; Biological Process: regulation of transcription, DNA-templated (GO:0006355);; Molecular Function: sequence-specific DNA binding (GO:0043565);;	--	--	--	--	WRKY DNA -binding domain	Probable WRKY transcription factor 12 OS=Arabidopsis thaliana OX=3702 GN=WRKY12 PE=2 SV=1	PREDICTED: probable WRKY transcription factor 12 [Cucumis sativus]
Csa3G118080	3.27966	9.96955	10.0271	3.31562	3.78504	4.95261	4.68194	3.87229	3.15665	-0.901371	down	-1.0091	down	-0.0985443	normal	--	--	Molecular Function: transcription factor activity, sequence-specific DNA binding (GO:0003700);; Cellular Component: nucleus (GO:0005634);; Biological Process: regulation of transcription, DNA-templated (GO:0006355);; Biological Process: shade avoidance (GO:0009641);; Biological Process: response to hormone (GO:0009725);; Biological Process: response to far red light (GO:0010218);; Molecular Funct…	K09338|8.08021e-141|csv:101222132|K09338 homeobox-leucine zipper protein | (RefSeq) homeobox-leucine zipper protein HAT3-like	--	[K]	Transcription	HD-ZIP protein N terminus;; Homeobox domain;; Homeobox associated leucine zipper;; Homeobox KN domain	Homeobox-leucine zipper protein HAT3 OS=Arabidopsis thaliana OX=3702 GN=HAT3 PE=1 SV=2	PREDICTED: homeobox-leucine zipper protein HAT3-like [Cucumis sativus]
Csa3G118220	28.7272	19.7746	19.1599	12.3082	13.8003	16.0408	7.39554	8.78677	5.76065	-0.677471	down	-1.68375	down	-0.999481	down	--	--	--	K20028|2.86429e-19|cmo:103483147|K20028 palmitoyltransferase ZDHHC2/15/20 [EC:2.3.1.225] | (RefSeq) probable protein S-acyltransferase 12	--	--	--	Putative AtpZ or ATP-synthase-associated	--	hypothetical protein Csa_3G118220 [Cucumis sativus]
Csa3G119280	1.7679	5.92027	2.85045	1.23639	2.00479	1.5369	1.69031	1.26266	1.66712	-1.09534	down	-1.21739	down	-0.112587	normal	--	--	--	--	--	--	--	--	--	PREDICTED: DNA-directed RNA polymerase II subunit RPB1-like [Cucumis sativus]
Csa3G119290	4.51601	11.3969	6.14126	2.59588	2.77135	3.59871	2.79625	2.70634	3.02077	-1.27083	down	-1.40794	down	-0.129385	normal	--	--	--	--	--	--	--	--	--	PREDICTED: leucine-rich repeat extensin-like protein 5 [Cucumis sativus]
Csa3G119300	1.7343	3.1209	1.98612	0.92247	1.16088	1.31218	0.563258	0.471064	1.0206	-0.987447	down	-1.77666	down	-0.781601	normal	--	--	--	--	--	--	--	--	--	PREDICTED: atherin-like [Cucumis sativus]
Csa3G119630	1.23986	3.6336	2.38297	1.00657	1.18389	1.43195	1.42726	1.0542	1.40017	-0.992057	down	-0.943373	down	0.0571347	normal	[T]	Signal transduction mechanisms	Molecular Function: intracellular cyclic nucleotide activated cation channel activity (GO:0005221);; Molecular Function: inward rectifier potassium channel activity (GO:0005242);; Molecular Function: cation channel activity (GO:0005261);; Molecular Function: calmodulin binding (GO:0005516);; Cellular Component: plasma membrane (GO:0005886);; Biological Process: ion transport (GO:0006811);; Biolog…	K05391|0|csv:101206492|K05391 cyclic nucleotide gated channel, other eukaryote | (RefSeq) cyclic nucleotide-gated ion channel 1-like	Plant-pathogen interaction (ko04626)	[PT]	Inorganic ion transport and metabolism;; Signal transduction mechanisms	Ion transport protein	Cyclic nucleotide-gated ion channel 1 OS=Arabidopsis thaliana OX=3702 GN=CNGC1 PE=1 SV=1	PREDICTED: cyclic nucleotide-gated ion channel 1-like [Cucumis sativus]
Csa3G119640	0.652599	1.85286	1.09066	0.300393	0.427401	0.725065	0.123437	0.286197	0.257999	-1.27477	down	-2.46538	down	--	--	[T]	Signal transduction mechanisms	Molecular Function: intracellular cyclic nucleotide activated cation channel activity (GO:0005221);; Molecular Function: inward rectifier potassium channel activity (GO:0005242);; Molecular Function: cation channel activity (GO:0005261);; Molecular Function: calmodulin binding (GO:0005516);; Cellular Component: plasma membrane (GO:0005886);; Biological Process: ion transport (GO:0006811);; Biolog…	K05391|0|csv:101206736|K05391 cyclic nucleotide gated channel, other eukaryote | (RefSeq) cyclic nucleotide-gated ion channel 1	Plant-pathogen interaction (ko04626)	[PT]	Inorganic ion transport and metabolism;; Signal transduction mechanisms	Ion transport protein	Cyclic nucleotide-gated ion channel 1 OS=Arabidopsis thaliana OX=3702 GN=CNGC1 PE=1 SV=1	PREDICTED: cyclic nucleotide-gated ion channel 1 [Cucumis sativus]
Csa3G134850	16.7449	60.2834	67.4592	11.1772	15.4927	43.2286	18.6135	28.8017	19.3142	-1.0202	down	-1.152	down	-0.123351	normal	[IR]	Lipid transport and metabolism;; General function prediction only	Biological Process: alcohol metabolic process (GO:0006066);; Molecular Function: electron carrier activity (GO:0009055);; Biological Process: response to cold (GO:0009409);; Cellular Component: integral component of membrane (GO:0016021);; Cellular Component: intracellular membrane-bounded organelle (GO:0043231);; Molecular Function: long-chain-alcohol oxidase activity (GO:0046577);; Molecular Fu…	K17756|0|csv:105434388|K17756 long-chain-alcohol oxidase [EC:1.1.3.20] | (RefSeq) long-chain-alcohol oxidase FAO1	--	--	--	GMC oxidoreductase;; GMC oxidoreductase;; FAD binding domain;; NAD(P)-binding Rossmann-like domain	Long-chain-alcohol oxidase FAO1 OS=Lotus japonicus OX=34305 GN=FAO1 PE=1 SV=1	hypothetical protein Csa_3G134850 [Cucumis sativus]
Csa3G144740	3.38833	16.8487	9.37397	2.05859	3.75815	2.75013	3.58725	3.75771	3.3439	-1.89065	down	-1.66241	down	0.23846	normal	--	--	Molecular Function: translation initiation factor activity (GO:0003743);; Cellular Component: cytoplasm (GO:0005737);; Biological Process: methylation-dependent chromatin silencing (GO:0006346);; Biological Process: translational initiation (GO:0006413);; Biological Process: cell-cell signaling (GO:0007267);; Biological Process: virus induced gene silencing (GO:0009616);; Biological Process: dete…	K11593|0|csv:101221352|K11593 eukaryotic translation initiation factor 2C | (RefSeq) protein argonaute 10	--	[J]	Translation, ribosomal structure and biogenesis	Piwi domain;; N-terminal domain of argonaute;; PAZ domain;; Argonaute linker 1 domain;; Argonaute linker 2 domain;; Mid domain of argonaute	Protein argonaute 10 OS=Arabidopsis thaliana OX=3702 GN=AGO10 PE=2 SV=1	PREDICTED: protein argonaute 10 [Cucumis sativus]
Csa3G147770	3.19939	16.7523	16.2895	2.2453	5.11708	2.57417	4.07185	3.18093	3.08027	-1.81493	down	-1.84308	down	-0.0157449	normal	[E]	Amino acid transport and metabolism	Biological Process: polysaccharide biosynthetic process (GO:0000271);; Molecular Function: spermidine synthase activity (GO:0004766);; Cellular Component: cytoplasm (GO:0005737);; Biological Process: pattern specification process (GO:0007389);; Biological Process: metabolic process (GO:0008152);; Biological Process: regulation of cell size (GO:0008361);; Biological Process: multidimensional cell …	K18787|0|csv:101221818|K18787 thermospermine synthase [EC:2.5.1.79] | (RefSeq) thermospermine synthase ACAULIS5-like	--	[E]	Amino acid transport and metabolism	Spermine/spermidine synthase domain;; Spermidine synthase tetramerisation domain	Thermospermine synthase ACAULIS5 OS=Arabidopsis thaliana OX=3702 GN=ACL5 PE=1 SV=1	PREDICTED: thermospermine synthase ACAULIS5-like [Cucumis sativus]
Csa3G149380	2.47812	5.9608	3.45603	1.20243	0.777566	1.8632	0.756183	0.532118	0.409892	-1.59491	down	-2.82655	down	-1.22533	down	--	--	--	--	--	--	--	Fantastic Four meristem regulator	Protein FANTASTIC FOUR 3 OS=Arabidopsis thaliana OX=3702 GN=FAF3 PE=2 SV=1	PREDICTED: protein FANTASTIC FOUR 3 [Cucumis sativus]
Csa3G153170	1.18447	3.46769	2.72931	0.979121	0.632486	0.957008	0.718101	0.53502	0.65537	-1.19119	down	-1.60146	down	-0.401794	normal	[Q]	Secondary metabolites biosynthesis, transport and catabolism	Cellular Component: cytoplasm (GO:0005737);; Molecular Function: flavonol synthase activity (GO:0045431);; Biological Process: flavonol biosynthetic process (GO:0051555);; Biological Process: oxidation-reduction process (GO:0055114);;	--	--	[QR]	Secondary metabolites biosynthesis, transport and catabolism;; General function prediction only	non-haem dioxygenase in morphine synthesis N-terminal;; 2OG-Fe(II) oxygenase superfamily	Protein SRG1 OS=Arabidopsis thaliana OX=3702 GN=SRG1 PE=2 SV=1	PREDICTED: protein SRG1 [Cucumis sativus]
Csa3G154410	30.5266	28.1664	58.5176	0	0	0	0.064149	0	0	-13.0347	down	-10.0371	down	--	--	--	--	Biological Process: response to oxidative stress (GO:0006979);;	--	--	--	--	Pollen proteins Ole e I like	Phylloplanin OS=Nicotiana tabacum OX=4097 PE=1 SV=1	PREDICTED: phylloplanin-like [Cucumis sativus]
Csa3G159420	93.8711	75.9683	109.864	0.348106	1.02546	0.267135	0.37836	0.10371	0.313624	-7.37952	down	-8.38876	down	--	--	--	--	--	--	--	--	--	--	--	PREDICTED: phylloplanin-like [Cucumis sativus]
Csa3G164460	3.10878	7.07958	4.67654	2.32124	3.00141	1.63457	1.11456	0.676793	4.29284	-1.05808	down	-1.34325	down	-0.275594	normal	--	--	--	--	--	--	--	zinc-finger of the FCS-type, C2-C2	Protein MARD1 OS=Arabidopsis thaliana OX=3702 GN=MARD1 PE=2 SV=2	PREDICTED: uncharacterized protein LOC101206584 [Cucumis sativus]
Csa3G168940	57.3798	40.4235	34.5736	27.871	22.08	21.926	11.2346	14.4022	11.0172	-0.873353	down	-1.91495	down	-1.03496	down	--	--	Biological Process: response to hormone (GO:0009725);;	K09422|0|csv:101222436|K09422 myb proto-oncogene protein, plant | (RefSeq) transcription factor MYB108	--	[K]	Transcription	Myb-like DNA-binding domain;; Myb-like DNA-binding domain	Transcription factor MYB78 OS=Arabidopsis thaliana OX=3702 GN=MYB78 PE=2 SV=1	PREDICTED: transcription factor MYB108 [Cucumis sativus]
Csa3G172370	5.84287	12.8122	12.3489	5.10106	5.38152	7.35317	6.28446	4.72417	7.79595	-0.772503	down	-0.77152	down	0.0102477	normal	--	--	Biological Process: defense response (GO:0006952);; Cellular Component: chloroplast (GO:0009507);; Biological Process: response to biotic stimulus (GO:0009607);; Biological Process: cellular cation homeostasis (GO:0030003);; Biological Process: divalent metal ion transport (GO:0070838);;	--	--	--	--	Pathogenesis-related protein Bet v I family	MLP-like protein 43 OS=Arabidopsis thaliana OX=3702 GN=MLP43 PE=1 SV=1	Csf-2 [Cucumis sativus]
Csa3G179100	2.68664	4.97358	3.07425	0.472827	0.519398	0.594722	0.188413	0.090302	0.111727	-2.69932	down	-4.74524	down	-2.03943	down	--	--	Molecular Function: transferase activity, transferring phosphorus-containing groups (GO:0016772);;	--	--	--	--	--	--	PREDICTED: uncharacterized protein LOC101212506 [Cucumis sativus]
Csa3G179130	4.47319	8.44283	5.88994	3.09197	2.76189	3.13464	0.454244	0.464733	0.292905	-1.04984	down	-3.93844	down	-2.88097	down	--	--	--	K09264|1.80135e-52|csv:101212022|K09264 MADS-box transcription factor, plant | (RefSeq) MADS-box transcription factor 6-like	--	--	--	--	--	hypothetical protein Csa_3G179130 [Cucumis sativus]
Csa3G179160	0.623285	3.63432	2.23868	0.384056	0.499698	0.883126	0.054929	0.092838	0.183632	-1.93573	down	-4.08548	down	--	--	--	--	Molecular Function: DNA binding (GO:0003677);; Molecular Function: transcription factor activity, sequence-specific DNA binding (GO:0003700);; Cellular Component: nucleus (GO:0005634);; Biological Process: regulation of transcription, DNA-templated (GO:0006355);; Biological Process: abscission (GO:0009838);; Biological Process: regulation of flower development (GO:0009909);; Biological Process: v…	--	--	[K]	Transcription	K-box region	MADS-box protein AGL42 OS=Arabidopsis thaliana OX=3702 GN=AGL42 PE=1 SV=1	hypothetical protein Csa_3G179160 [Cucumis sativus]
Csa3G184590	1.27875	10.2039	4.9442	0.831065	1.33098	1.80551	1.25134	1.56658	2.28632	-2.0025	down	-1.71943	down	0.292973	normal	--	--	--	--	--	--	--	--	Probable membrane-associated kinase regulator 5 OS=Arabidopsis thaliana OX=3702 GN=MAKR5 PE=2 SV=1	PREDICTED: probable membrane-associated kinase regulator 5 [Cucumis sativus]
Csa3G212490	24.8525	17.2077	19.7198	10.5894	11.1416	12.9749	6.15659	8.57677	7.08544	-0.823771	down	-1.56198	down	-0.730742	down	--	--	Biological Process: transition metal ion transport (GO:0000041);; Molecular Function: transcription factor activity, sequence-specific DNA binding (GO:0003700);; Biological Process: regulation of transcription, DNA-templated (GO:0006355);; Biological Process: response to inorganic substance (GO:0010035);; Molecular Function: sequence-specific DNA binding (GO:0043565);;	--	--	--	--	WRKY DNA -binding domain	Probable WRKY transcription factor 9 OS=Arabidopsis thaliana OX=3702 GN=WRKY9 PE=2 SV=1	PREDICTED: uncharacterized protein LOC101215114 isoform X1 [Cucumis sativus]
Csa3G348940	15.7598	16.0604	14.4081	7.90607	9.80315	8.14908	2.43469	3.66672	2.00428	-0.82188	down	-2.55321	down	-1.72381	down	--	--	--	--	--	--	--	--	--	hypothetical protein Csa_3G348940 [Cucumis sativus]
Csa3G431430	1.45978	5.33504	3.41919	0.304111	0.541656	0.704187	0.099774	0.326731	0.276682	-2.67551	down	-3.8428	down	--	--	[HJ]	Coenzyme transport and metabolism;; Translation, ribosomal structure and biogenesis	Cellular Component: chloroplast (GO:0009507);; Biological Process: auxin-activated signaling pathway (GO:0009734);; Biological Process: unidimensional cell growth (GO:0009826);; Biological Process: auxin homeostasis (GO:0010252);; Molecular Function: indole-3-acetic acid amido synthetase activity (GO:0010279);; Biological Process: response to cyclopentenone (GO:0010583);;	K14487|0|csv:101219992|K14487 auxin responsive GH3 gene family | (RefSeq) indole-3-acetic acid-amido synthetase GH3.6-like	Plant hormone signal transduction (ko04075)	--	--	GH3 auxin-responsive promoter	Indole-3-acetic acid-amido synthetase GH3.6 OS=Arabidopsis thaliana OX=3702 GN=GH3.6 PE=1 SV=1	PREDICTED: indole-3-acetic acid-amido synthetase GH3.6-like [Cucumis sativus]
Csa3G435550	42.7146	70.2469	72.155	51.11	27.1463	28.3867	12.3467	28.9492	13.0603	-0.775869	down	-1.80486	down	-1.02046	down	--	--	--	--	--	--	--	Protein of unknown function (DUF4005);; IQ calmodulin-binding motif	--	PREDICTED: protein IQ-DOMAIN 14-like [Cucumis sativus]
Csa3G485860	1.18174	3.18116	2.19755	0.706944	0.989516	1.13045	0.853938	0.540668	0.627971	-1.16488	down	-1.72464	down	-0.551205	normal	--	--	--	--	--	--	--	--	Transcription factor bHLH68 OS=Arabidopsis thaliana OX=3702 GN=BHLH68 PE=1 SV=2	PREDICTED: transcription factor bHLH68-like isoform X2 [Cucumis sativus]
Csa3G560210	2.98006	6.95885	5.75366	2.07805	2.89419	3.60114	1.71898	1.52298	0.655749	-0.839351	down	-2.00811	down	-1.16178	down	--	--	--	--	--	--	--	No apical meristem (NAM) protein	NAC domain-containing protein 83 OS=Arabidopsis thaliana OX=3702 GN=NAC083 PE=1 SV=1	PREDICTED: NAC domain-containing protein 68-like isoform X2 [Cucumis sativus]
Csa3G698490	11.5865	29.6276	20.0425	12.1582	12.1335	8.22883	15.256	14.5363	10.2438	-0.882815	down	-0.65561	down	0.235916	normal	[QV]	Secondary metabolites biosynthesis, transport and catabolism;; Defense mechanisms	Molecular Function: monooxygenase activity (GO:0004497);; Molecular Function: binding (GO:0005488);; Molecular Function: oxidoreductase activity (GO:0016491);; Molecular Function: oxidoreductase activity, acting on paired donors, with incorporation or reduction of molecular oxygen (GO:0016705);; Molecular Function: metal ion binding (GO:0046872);;	--	--	[Q]	Secondary metabolites biosynthesis, transport and catabolism	Cytochrome P450	Cytochrome P450 705A5 OS=Arabidopsis thaliana OX=3702 GN=CYP705A5 PE=2 SV=1	cytochrome P450 705A5-like [Cucumis sativus]
Csa3G710840	0.803361	2.44166	2.247	0.717716	0.774623	0.608565	0.948439	0.541666	0.733356	-1.30512	down	-1.46138	down	-0.145943	normal	[V]	Defense mechanisms	Molecular Function: ATP binding (GO:0005524);; Cellular Component: vacuolar membrane (GO:0005774);; Cellular Component: plasma membrane (GO:0005886);; Biological Process: obsolete ATP catabolic process (GO:0006200);; Cellular Component: integral component of membrane (GO:0016021);; Cellular Component: cytoplasmic vesicle (GO:0016023);; Molecular Function: 2-alkenal reductase [NAD(P)] activity (GO…	K05674|0|csv:101211576|K05674 ATP-binding cassette, subfamily C (CFTR/MRP), member 10 | (RefSeq) ABC transporter C family member 13	ABC transporters (ko02010)	[Q]	Secondary metabolites biosynthesis, transport and catabolism	ABC transporter;; ABC transporter transmembrane region;; Dynamin family;; 50S ribosome-binding GTPase	ABC transporter C family member 13 OS=Arabidopsis thaliana OX=3702 GN=ABCC13 PE=2 SV=3	hypothetical protein Csa_3G710840 [Cucumis sativus]
Csa3G732470	4.13175	9.24325	22.5362	1.46778	1.94871	2.01338	0.756152	0.715732	6.07696	-2.68954	down	-2.30436	down	0.400307	normal	--	--	Cellular Component: cytoplasm (GO:0005737);; Molecular Function: anthranilate N-benzoyltransferase activity (GO:0047672);;	--	--	--	--	Transferase family	BAHD acyltransferase DCR OS=Arabidopsis thaliana OX=3702 GN=DCR PE=2 SV=1	PREDICTED: uncharacterized acetyltransferase At3g50280 [Cucumis sativus]
Csa3G735010	1.27151	3.67248	2.04597	0.75334	1.08454	1.2658	0.629138	1.28333	1.2888	-1.12867	down	-1.11308	down	0.0230418	normal	--	--	Biological Process: single-organism process (GO:0044699);;	--	--	[P]	Inorganic ion transport and metabolism	Heavy-metal-associated domain	Protein SODIUM POTASSIUM ROOT DEFECTIVE 2 OS=Arabidopsis thaliana OX=3702 GN=NAKR2 PE=2 SV=1	PREDICTED: uncharacterized protein LOC101206437 [Cucumis sativus]
Csa3G743950	232.342	210.02	210.897	35.9541	43.172	69.3243	1.07029	2.90422	4.94264	-2.12873	down	-6.25481	down	-4.11708	down	--	--	Biological Process: defense response (GO:0006952);;	--	--	--	--	Thaumatin family	Thaumatin-like protein 1 OS=Prunus persica OX=3760 PE=2 SV=1	PREDICTED: thaumatin-like protein 1b [Cucumis sativus]
Csa3G751470	4.27454	5.97568	5.78098	1.54463	2.86122	3.26718	0.80131	0.682826	0.731389	-1.04296	down	-2.89798	down	-1.84714	down	--	--	Molecular Function: ATP binding (GO:0005524);; Cellular Component: cell wall (GO:0005618);; Cellular Component: mitochondrion (GO:0005739);; Cellular Component: vacuole (GO:0005773);; Cellular Component: Golgi apparatus (GO:0005794);; Cellular Component: cytosol (GO:0005829);; Cellular Component: plasma membrane (GO:0005886);; Cellular Component: plasmodesma (GO:0009506);; Cellular Component: chl…	--	--	--	--	WRC;; QLQ	Growth-regulating factor 4 OS=Arabidopsis thaliana OX=3702 GN=GRF4 PE=1 SV=1	PREDICTED: growth-regulating factor 3-like [Cucumis sativus]
Csa3G760500	20.2401	101.246	50.2621	9.93355	20.9064	15.7517	7.16803	10.7182	6.8285	-1.84726	down	-2.82927	down	-0.972892	down	--	--	--	--	--	--	--	Probable lipid transfer;; Protease inhibitor/seed storage/LTP family	Putative lipid-transfer protein DIR1 OS=Arabidopsis thaliana OX=3702 GN=DIR1 PE=1 SV=1	PREDICTED: putative lipid-transfer protein DIR1 [Cucumis sativus]
Csa3G776310	4.3277	5.44307	4.98147	1.64741	0.908536	2.99297	0.943008	0.981794	1.43966	-1.38848	down	-2.16912	down	--	--	--	--	Cellular Component: nucleus (GO:0005634);; Biological Process: autophagy (GO:0006914);; Biological Process: fatty acid catabolic process (GO:0009062);; Biological Process: adaxial/abaxial axis specification (GO:0009943);; Biological Process: regulation of meristem growth (GO:0010075);; Biological Process: leaf vascular tissue pattern formation (GO:0010305);; Biological Process: leaf shaping (GO:0…	--	--	--	--	--	Protein LITTLE ZIPPER 4 OS=Arabidopsis thaliana OX=3702 GN=ZPR4 PE=1 SV=1	protein LITTLE ZIPPER 4 [Cucurbita moschata]
Csa3G778370	3.37507	5.61311	5.87679	2.93448	2.17812	3.19142	1.66549	1.89785	2.41392	-0.807951	down	-1.35321	down	-0.536385	normal	--	--	Biological Process: negative regulation of transcription, DNA-templated (GO:0045892);;	--	--	--	--	Transcriptional repressor, ovate	Transcription repressor OFP6 OS=Arabidopsis thaliana OX=3702 GN=OFP6 PE=1 SV=1	PREDICTED: transcription repressor OFP6-like [Cucumis sativus]
Csa3G782720	1.41042	1.01666	1.30066	0.608284	0.491552	0.829077	0.070322	0.455738	0.254324	-0.922436	down	-2.27336	down	--	--	--	--	--	--	--	[K]	Transcription	SRF-type transcription factor (DNA-binding and dimerisation domain)	Agamous-like MADS-box protein AGL80 OS=Arabidopsis thaliana OX=3702 GN=AGL80 PE=1 SV=1	PREDICTED: uncharacterized protein LOC101219702 [Cucumis sativus]
Csa3G812150	389.856	156.996	373.794	149.845	153.292	163.82	149.838	138.535	147.711	-1.20132	down	-1.37195	down	-0.16226	normal	[U]	Intracellular trafficking, secretion, and vesicular transport	Biological Process: protein transport (GO:0015031);; Cellular Component: membrane (GO:0016020);;	K10956|0|csv:101208540|K10956 protein transport protein SEC61 subunit alpha | (RefSeq) protein transport protein Sec61 subunit alpha-like	Protein export (ko03060);; Protein processing in endoplasmic reticulum (ko04141);; Phagosome (ko04145)	[UO]	Intracellular trafficking, secretion, and vesicular transport;; Posttranslational modification, protein turnover, chaperones	SecY translocase;; Plug domain of Sec61p	Protein transport protein Sec61 subunit alpha OS=Pyrenomonas salina OX=3034 PE=2 SV=1	PREDICTED: protein transport protein Sec61 subunit alpha [Cucumis sativus]
Csa3G812220	10.3668	6.41144	5.57289	3.90967	3.86233	3.08354	1.21492	1.5209	1.25431	-1.03664	down	-2.5442	down	-1.5004	down	[G]	Carbohydrate transport and metabolism	Molecular Function: hydrolase activity, hydrolyzing O-glycosyl compounds (GO:0004553);; Biological Process: metabolic process (GO:0008152);;	K01188|0|csv:101207075|K01188 beta-glucosidase [EC:3.2.1.21] | (RefSeq) beta-glucosidase 11-like	Cyanoamino acid metabolism (ko00460);; Starch and sucrose metabolism (ko00500);; Phenylpropanoid biosynthesis (ko00940)	[G]	Carbohydrate transport and metabolism	Glycosyl hydrolase family 1	Beta-glucosidase 11 OS=Arabidopsis thaliana OX=3702 GN=BGLU11 PE=2 SV=2	PREDICTED: beta-glucosidase 11-like [Cucumis sativus]
Csa3G813800	7.07182	8.81775	7.62832	4.3666	5.33838	4.81131	3.00655	2.74449	4.72808	-0.672175	down	-1.21782	down	-0.536915	normal	--	--	--	--	--	--	--	--	--	hypothetical protein Csa_3G813800 [Cucumis sativus]
Csa3G825060	3.7787	3.29162	4.26126	0.565795	0.790883	1.33051	0.325698	0.168373	0.066508	-2.05614	down	-4.2359	down	--	--	[J]	Translation, ribosomal structure and biogenesis	Molecular Function: endonuclease activity (GO:0004519);; Molecular Function: hydrolase activity (GO:0016787);;	K01166|1.95331e-146|csv:101212733|K01166 ribonuclease T2 [EC:3.1.27.1] | (RefSeq) ribonuclease MC-like	--	[A]	RNA processing and modification	Ribonuclease T2 family	Ribonuclease MC OS=Momordica charantia OX=3673 PE=1 SV=1	hypothetical protein Csa_3G825060 [Cucumis sativus]
Csa3G828940	1.50561	3.58452	1.95787	0.214507	1.06665	0.671667	1.49767	1.0857	1.03043	-1.79805	down	-1.01167	down	0.796011	normal	--	--	Cellular Component: extracellular region (GO:0005576);; Biological Process: glucuronoxylan metabolic process (GO:0010413);; Biological Process: xylan biosynthetic process (GO:0045492);; Biological Process: response to other organism (GO:0051707);;	--	--	--	--	Thaumatin family	Thaumatin-like protein OS=Arabidopsis thaliana OX=3702 GN=At1g18250 PE=2 SV=2	PREDICTED: thaumatin-like protein [Cucumis sativus]
Csa3G829240	1.7679	1.45221	0.938903	0.501483	0.35769	0.645559	0.178285	0.190861	0.172015	-1.43018	down	-2.97426	down	--	--	--	--	Cellular Component: Golgi apparatus (GO:0005794);; Biological Process: xyloglucan metabolic process (GO:0010411);;	--	--	--	--	GDSL/SGNH-like Acyl-Esterase family found in Pmr5 and Cas1p;; PMR5 N terminal Domain	Protein ALTERED XYLOGLUCAN 4-like OS=Arabidopsis thaliana OX=3702 GN=AXY4L PE=2 SV=1	PREDICTED: protein ALTERED XYLOGLUCAN 4-like [Cucumis sativus]
Csa3G829270	9.9467	12.2182	13.2402	5.84164	6.46591	7.7431	2.96752	2.35619	2.93988	-0.803129	down	-2.15325	down	-1.34189	down	[Q]	Secondary metabolites biosynthesis, transport and catabolism	Biological Process: fatty acid alpha-oxidation (GO:0001561);; Molecular Function: peroxidase activity (GO:0004601);; Biological Process: iron ion transport (GO:0006826);; Biological Process: response to oxidative stress (GO:0006979);; Biological Process: cell death (GO:0008219);; Biological Process: systemic acquired resistance (GO:0009627);; Biological Process: response to abscisic acid (GO:0009…	K10529|0|csv:101218397|K10529 alpha-dioxygenase [EC:1.-.-.-] | (RefSeq) alpha-dioxygenase 1	alpha-Linolenic acid metabolism (ko00592)	[R]	General function prediction only	Animal haem peroxidase	Alpha-dioxygenase 1 OS=Arabidopsis thaliana OX=3702 GN=DOX1 PE=1 SV=1	PREDICTED: alpha-dioxygenase 1 [Cucumis sativus]
Csa3G836520	9.15557	12.902	5.09162	0.912185	0.456893	0.372318	2.76338	1.13437	1.85988	-3.60521	down	-2.13842	down	1.47449	up	[P]	Inorganic ion transport and metabolism	Molecular Function: carbonate dehydratase activity (GO:0004089);; Molecular Function: zinc ion binding (GO:0008270);; Cellular Component: chloroplast stroma (GO:0009570);; Biological Process: carbon utilization (GO:0015976);;	K01673|0|csv:101213998|K01673 carbonic anhydrase [EC:4.2.1.1] | (RefSeq) carbonic anhydrase 2	Nitrogen metabolism (ko00910)	[P]	Inorganic ion transport and metabolism	Carbonic anhydrase	Carbonic anhydrase, chloroplastic OS=Pisum sativum OX=3888 PE=1 SV=1	PREDICTED: carbonic anhydrase 2 isoform X1 [Cucumis sativus]
Csa3G843780	79.828	289.159	85.4359	79.7957	81.8559	78.9199	80.2126	79.5185	71.0753	-0.922998	down	-1.05322	down	-0.123167	normal	[O]	Posttranslational modification, protein turnover, chaperones	Biological Process: mitotic G2 phase (GO:0000085);; Biological Process: RNA methylation (GO:0001510);; Molecular Function: ATP binding (GO:0005524);; Cellular Component: cytosol (GO:0005829);; Biological Process: gluconeogenesis (GO:0006094);; Biological Process: protein folding (GO:0006457);; Biological Process: cytoskeleton organization (GO:0007010);; Biological Process: pyrimidine ribonucleoti…	K09500|0|csv:101205260|K09500 T-complex protein 1 subunit theta | (RefSeq) T-complex protein 1 subunit theta	--	[O]	Posttranslational modification, protein turnover, chaperones	TCP-1/cpn60 chaperonin family	T-complex protein 1 subunit theta OS=Arabidopsis thaliana OX=3702 GN=CCT8 PE=1 SV=1	PREDICTED: T-complex protein 1 subunit theta [Cucumis sativus]
Csa3G860270	1.78568	4.91479	3.21014	1.10192	1.11177	1.18584	0.727207	0.443339	1.19733	-1.49714	down	-2.04461	down	-0.538743	normal	--	--	Cellular Component: nucleus (GO:0005634);; Molecular Function: protein dimerization activity (GO:0046983);;	--	--	--	--	--	Transcription factor bHLH110 OS=Arabidopsis thaliana OX=3702 GN=BHLH110 PE=2 SV=2	PREDICTED: transcription factor bHLH110 isoform X1 [Cucumis sativus]
Csa3G865390	8.50257	34.0429	19.5292	4.23261	5.19112	7.22313	2.02238	1.61168	1.54365	-1.8649	down	-3.60274	down	-1.72971	down	--	--	Biological Process: polysaccharide biosynthetic process (GO:0000271);; Cellular Component: plasma membrane (GO:0005886);; Biological Process: water transport (GO:0006833);; Biological Process: pattern specification process (GO:0007389);; Biological Process: regulation of cell size (GO:0008361);; Biological Process: response to salt stress (GO:0009651);; Cellular Component: plant-type vacuole memb…	--	--	--	--	EamA-like transporter family	Protein WALLS ARE THIN 1 OS=Arabidopsis thaliana OX=3702 GN=WAT1 PE=1 SV=1	PREDICTED: protein WALLS ARE THIN 1-like [Cucumis sativus]
Csa3G872040	22.373	16.3396	13.851	11.0543	9.57547	7.06068	5.58436	3.41552	3.46231	-0.910291	down	-2.12822	down	-1.21039	down	--	--	Molecular Function: calmodulin binding (GO:0005516);; Cellular Component: mitochondrion (GO:0005739);; Biological Process: auxin-activated signaling pathway (GO:0009734);;	K14488|3.302e-66|csv:101217643|K14488 SAUR family protein | (RefSeq) auxin-induced protein 15A-like	Plant hormone signal transduction (ko04075)	--	--	Auxin responsive protein	Auxin-responsive protein SAUR50 OS=Arabidopsis thaliana OX=3702 GN=SAUR50 PE=1 SV=1	PREDICTED: auxin-induced protein 15A-like [Cucumis sativus]
Csa3G873800	1.18323	2.31079	1.62739	0.685347	1.40215	0.692595	0.831109	0.566452	0.632353	-0.832101	down	-1.35447	down	-0.512889	normal	[O]	Posttranslational modification, protein turnover, chaperones	Molecular Function: serine-type endopeptidase activity (GO:0004252);; Cellular Component: cell wall (GO:0005618);; Biological Process: proteolysis (GO:0006508);; Molecular Function: identical protein binding (GO:0042802);; Biological Process: negative regulation of catalytic activity (GO:0043086);; Cellular Component: apoplast (GO:0048046);;	--	--	--	--	Subtilase family;; Peptidase inhibitor I9;; PA domain	CO(2)-response secreted protease OS=Arabidopsis thaliana OX=3702 GN=CRSP PE=2 SV=1	PREDICTED: CO(2)-response secreted protease [Cucumis sativus]
Csa3G874350	10.4814	98.249	37.5644	7.18313	9.83753	6.98897	5.5806	3.92072	5.26714	-2.56276	down	-3.33515	down	-0.762667	down	[R]	General function prediction only	--	--	--	--	--	--	Uncharacterized protein At5g48480 OS=Arabidopsis thaliana OX=3702 GN=At5g48480 PE=1 SV=1	PREDICTED: uncharacterized protein At5g48480 [Cucumis sativus]
Csa3G881910	4.23309	3.41435	4.70963	1.6445	2.04181	2.96512	1.33203	1.31636	1.08157	-0.865522	down	-1.79189	down	-0.919076	down	[T]	Signal transduction mechanisms	Molecular Function: voltage-gated potassium channel activity (GO:0005249);; Molecular Function: binding (GO:0005488);; Biological Process: potassium ion transport (GO:0006813);; Biological Process: response to hexose (GO:0009746);; Cellular Component: integral component of membrane (GO:0016021);; Biological Process: transmembrane transport (GO:0055085);;	K05391|0|csv:101211072|K05391 cyclic nucleotide gated channel, other eukaryote | (RefSeq) probable cyclic nucleotide-gated ion channel 14	Plant-pathogen interaction (ko04626)	[PT]	Inorganic ion transport and metabolism;; Signal transduction mechanisms	Ion transport protein;; Cyclic nucleotide-binding domain	Probable cyclic nucleotide-gated ion channel 14 OS=Arabidopsis thaliana OX=3702 GN=CNGC14 PE=2 SV=2	PREDICTED: probable cyclic nucleotide-gated ion channel 14 [Cucumis sativus]
Csa3G888520	6.57719	11.5882	6.65148	3.13845	3.97424	4.24787	2.56059	1.61202	1.79821	-1.10506	down	-2.09655	down	-0.984389	down	[S]	Function unknown	Cellular Component: mitochondrion (GO:0005739);;	--	--	--	--	Protein of unknown function, DUF599	--	PREDICTED: uncharacterized protein LOC101209101 [Cucumis sativus]
Csa3G889760	7.94798	7.56572	6.34715	2.37174	3.52465	5.06541	2.50855	3.66025	4.01956	-0.985619	down	-1.15165	down	-0.158933	normal	[G]	Carbohydrate transport and metabolism	Biological Process: metabolic process (GO:0008152);; Molecular Function: anthocyanidin 3-O-glucosyltransferase activity (GO:0047213);; Molecular Function: trans-zeatin O-beta-D-glucosyltransferase activity (GO:0050403);; Molecular Function: cis-zeatin O-beta-D-glucosyltransferase activity (GO:0050502);;	--	--	[GC]	Carbohydrate transport and metabolism;; Energy production and conversion	UDP-glucoronosyl and UDP-glucosyl transferase	7-deoxyloganetin glucosyltransferase OS=Gardenia jasminoides OX=114476 GN=UGT85A24 PE=1 SV=1	PREDICTED: 7-deoxyloganetin glucosyltransferase [Cucumis sativus]
Csa3G890120	5.5465	7.35813	5.64107	2.99957	2.60375	3.02549	4.07324	3.15411	3.08474	-1.07993	down	-0.896659	down	0.190715	normal	--	--	Cellular Component: nucleus (GO:0005634);;	--	--	--	--	Domain of unknown function (DUF296)	AT-hook motif nuclear-localized protein 17 OS=Arabidopsis thaliana OX=3702 GN=AHL17 PE=2 SV=1	hypothetical protein Csa_3G890120 [Cucumis sativus]
Csa3G895090	1.02795	2.86813	2.40336	0.285631	0.756063	1.58078	0.28873	0.176539	0.465465	-1.26683	down	-2.79491	down	--	--	--	--	Biological Process: cellular process (GO:0009987);;	K14484|0|csv:101219386|K14484 auxin-responsive protein IAA | (RefSeq) auxin-responsive protein IAA26-like	Plant hormone signal transduction (ko04075)	--	--	AUX/IAA family	Auxin-responsive protein IAA26 OS=Arabidopsis thaliana OX=3702 GN=IAA26 PE=1 SV=2	PREDICTED: auxin-responsive protein IAA26-like [Cucumis sativus]
Csa3G895620	1.01083	4.19797	2.33536	0.388736	1.21076	0.408646	1.2626	0.907437	0.673584	-1.88028	down	-1.44729	down	0.443892	normal	[K]	Transcription	Molecular Function: nucleotide binding (GO:0000166);; Molecular Function: protein kinase activity (GO:0004672);; Cellular Component: endoplasmic reticulum (GO:0005783);; Cellular Component: plasma membrane (GO:0005886);; Biological Process: response to hormone (GO:0009725);; Biological Process: response to auxin (GO:0009733);; Biological Process: response to brassinosteroid (GO:0009741);; Cellula…	--	--	--	--	Leucine rich repeat;; Leucine Rich repeats (2 copies);; Leucine Rich Repeat;; Protein kinase domain;; Protein tyrosine kinase;; Leucine Rich repeat;; Leucine rich repeat N-terminal domain	Probably inactive leucine-rich repeat receptor-like protein kinase At2g25790 OS=Arabidopsis thaliana OX=3702 GN=At2g25790 PE=2 SV=1	PREDICTED: probably inactive leucine-rich repeat receptor-like protein kinase At2g25790 [Cucumis sativus]
Csa3G902220	3.8723	3.43819	3.00839	0	0.600329	1.06698	0.333003	0.151404	0	-2.6161	down	-4.38538	down	--	--	--	--	Molecular Function: catalytic activity (GO:0003824);; Cellular Component: cytoplasmic vesicle (GO:0016023);;	--	--	--	--	--	--	PREDICTED: glycine-rich cell wall structural protein 1.8 [Cucumis sativus]
Csa3G902920	8.47053	14.2716	8.45441	3.75637	3.58988	6.5196	2.38228	2.22216	2.53902	-1.15223	down	-2.17415	down	-1.01522	down	[E]	Amino acid transport and metabolism	Cellular Component: cytosol (GO:0005829);; Biological Process: proteolysis (GO:0006508);; Molecular Function: metallopeptidase activity (GO:0008237);;	K01438|0|csv:101220538|K01438 acetylornithine deacetylase [EC:3.5.1.16] | (RefSeq) acetylornithine deacetylase-like	Arginine biosynthesis (ko00220);; 2-Oxocarboxylic acid metabolism (ko01210);; Biosynthesis of amino acids (ko01230)	[E]	Amino acid transport and metabolism	Peptidase family M20/M25/M40;; Peptidase dimerisation domain	Acetylornithine deacetylase OS=Arabidopsis thaliana OX=3702 GN=At4g17830 PE=2 SV=1	PREDICTED: acetylornithine deacetylase-like [Cucumis sativus]
Csa3G915110	169.076	151.776	179.54	94.4573	80.6104	148.246	181.953	95.379	67.7788	-0.619321	down	-0.593124	down	0.0323938	normal	--	--	Molecular Function: steroid binding (GO:0005496);; Cellular Component: nucleus (GO:0005634);; Cellular Component: endoplasmic reticulum (GO:0005783);; Cellular Component: plasma membrane (GO:0005886);; Cellular Component: chloroplast thylakoid membrane (GO:0009535);; Biological Process: indoleacetic acid biosynthetic process (GO:0009684);; Biological Process: response to ethylene (GO:0009723);; M…	K17278|3.06197e-132|csv:101207362|K17278 membrane-associated progesterone receptor component | (RefSeq) membrane steroid-binding protein 2	--	[R]	General function prediction only	Cytochrome b5-like Heme/Steroid binding domain	Membrane steroid-binding protein 2 OS=Arabidopsis thaliana OX=3702 GN=MSBP2 PE=1 SV=1	PREDICTED: membrane steroid-binding protein 2 [Cucumis sativus]
Csa4G001590	0.7552	0.523729	0.785103	0.14451	0.070957	0.312637	0.334316	0.247964	0.377134	-1.91006	down	-1.16536	down	--	--	[P]	Inorganic ion transport and metabolism	Molecular Function: potassium ion transmembrane transporter activity (GO:0015079);; Cellular Component: membrane (GO:0016020);; Biological Process: potassium ion transmembrane transport (GO:0071805);;	K03549|0|csv:101215797|K03549 KUP system potassium uptake protein | (RefSeq) potassium transporter 5-like	--	--	--	K+ potassium transporter	Potassium transporter 5 OS=Oryza sativa subsp. japonica OX=39947 GN=HAK5 PE=2 SV=2	hypothetical protein Csa_4G001590 [Cucumis sativus]
Csa4G003680	35.1201	28.2574	28.2495	20.2293	16.3786	21.5994	15.6673	15.0766	14.1494	-0.644279	down	-1.08919	down	-0.437943	normal	[R]	General function prediction only	Cellular Component: extracellular region (GO:0005576);; Cellular Component: endoplasmic reticulum (GO:0005783);;	--	--	--	--	NHL repeat	--	PREDICTED: uncharacterized protein LOC101220240 [Cucumis sativus]
Csa4G004780	1.0753	3.10133	2.76939	0.49995	0.46884	1.53318	0.553348	0.293354	0.497983	-1.54875	down	-2.46605	down	--	--	[R]	General function prediction only	Molecular Function: carboxylic ester hydrolase activity (GO:0004091);; Molecular Function: retinyl-palmitate esterase activity (GO:0050253);; Molecular Function: methyl indole-3-acetate esterase activity (GO:0080030);; Molecular Function: methyl salicylate esterase activity (GO:0080031);; Molecular Function: methyl jasmonate esterase activity (GO:0080032);;	K06130|7.10984e-176|csv:101218579|K06130 lysophospholipase II [EC:3.1.1.5] | (RefSeq) acyl-protein thioesterase 2	Glycerophospholipid metabolism (ko00564)	[I]	Lipid transport and metabolism	Phospholipase/Carboxylesterase;; Serine hydrolase (FSH1);; Secretory lipase;; Dienelactone hydrolase family	Probable carboxylesterase SOBER1-like OS=Arabidopsis thaliana OX=3702 GN=At4g22300 PE=2 SV=1	PREDICTED: acyl-protein thioesterase 2 [Cucumis sativus]
Csa4G004840	11.9608	31.0587	22.8701	7.65202	10.2195	12.7528	11.9628	9.20398	16.1648	-1.07704	down	-0.880183	down	0.206057	normal	--	--	Biological Process: cell wall organization (GO:0071555);;	--	--	[R]	General function prediction only	Zn-finger in Ran binding protein and others	--	hypothetical protein Csa_4G004840 [Cucumis sativus]
Csa4G006070	459.482	235.769	275.638	163.512	138.933	176.092	11.3768	28.7863	15.5899	-1.02223	down	-4.18905	down	-3.16085	down	[I]	Lipid transport and metabolism	Biological Process: long-chain fatty acid metabolic process (GO:0001676);; Biological Process: defense response to insect (GO:0002213);; Biological Process: fatty acid metabolic process (GO:0006631);; Biological Process: unsaturated fatty acid biosynthetic process (GO:0006636);; Biological Process: phosphatidylglycerol biosynthetic process (GO:0006655);; Biological Process: lipid biosynthetic pro…	K20416|9.90506e-112|csv:101209978|K20416 palmitoyl-[glycerolipid] 7-desaturase [EC:1.14.19.42] | (RefSeq) palmitoyl-monogalactosyldiacylglycerol delta-7 desaturase, chloroplastic-like	--	[I]	Lipid transport and metabolism	Fatty acid desaturase	Palmitoyl-monogalactosyldiacylglycerol delta-7 desaturase, chloroplastic OS=Arabidopsis thaliana OX=3702 GN=ADS3 PE=1 SV=2	hypothetical protein Csa_4G006070 [Cucumis sativus]
Csa4G006080	102.057	62.2849	69.4093	41.7578	33.5741	37.4855	4.04926	6.34715	3.68502	-1.04343	down	-4.09645	down	-3.04562	down	[I]	Lipid transport and metabolism	Biological Process: long-chain fatty acid metabolic process (GO:0001676);; Biological Process: defense response to insect (GO:0002213);; Molecular Function: stearoyl-CoA 9-desaturase activity (GO:0004768);; Biological Process: fatty acid biosynthetic process (GO:0006633);; Biological Process: unsaturated fatty acid biosynthetic process (GO:0006636);; Biological Process: phosphatidylglycerol biosy…	K20416|4.2429e-61|csv:101209978|K20416 palmitoyl-[glycerolipid] 7-desaturase [EC:1.14.19.42] | (RefSeq) palmitoyl-monogalactosyldiacylglycerol delta-7 desaturase, chloroplastic-like	--	[I]	Lipid transport and metabolism	--	Palmitoyl-monogalactosyldiacylglycerol delta-7 desaturase, chloroplastic OS=Arabidopsis thaliana OX=3702 GN=ADS3 PE=1 SV=2	hypothetical protein Csa_4G006080 [Cucumis sativus]
Csa4G009890	1.07574	4.25318	3.7698	0.746934	1.07663	1.21882	2.06847	1.33981	1.25136	-1.53092	down	-1.00131	down	0.539932	normal	--	--	--	--	--	--	--	--	--	hypothetical protein Csa_4G009890 [Cucumis sativus]
Csa4G025120	3.76651	3.47469	6.45938	2.218	1.494	3.39407	1.84091	0.335778	1.4523	-0.926473	down	-1.95717	down	-1.02167	normal	--	--	Molecular Function: transferase activity (GO:0016740);;	--	--	--	--	--	--	PREDICTED: glycine-rich cell wall structural protein 2 [Cucumis sativus]
Csa4G038710	10.4309	7.13942	7.32001	5.02493	3.63004	6.33325	3.20926	3.04779	2.48122	-0.701639	down	-1.60929	down	-0.901455	down	[QV]	Secondary metabolites biosynthesis, transport and catabolism;; Defense mechanisms	Molecular Function: iron ion binding (GO:0005506);; Cellular Component: endoplasmic reticulum (GO:0005783);; Molecular Function: electron carrier activity (GO:0009055);; Biological Process: response to brassinosteroid (GO:0009741);; Biological Process: unidimensional cell growth (GO:0009826);; Biological Process: jasmonic acid mediated signaling pathway (GO:0009867);; Molecular Function: steroid …	K09587|0|csv:101211854|K09587 steroid 22-alpha-hydroxylase [EC:1.14.13.-] | (RefSeq) cytochrome P450 90B1	Brassinosteroid biosynthesis (ko00905)	[QI]	Secondary metabolites biosynthesis, transport and catabolism;; Lipid transport and metabolism	Cytochrome P450	Cytochrome P450 90B1 OS=Arabidopsis thaliana OX=3702 GN=CYP90B1 PE=1 SV=2	PREDICTED: cytochrome P450 90B1 [Cucumis sativus]
Csa4G046610	161.602	91.406	150.178	60.0331	67.4488	79.0599	36.1853	40.2419	42.933	-0.959311	down	-1.82156	down	-0.854176	down	[I]	Lipid transport and metabolism	Cellular Component: nucleus (GO:0005634);; Molecular Function: S-adenosylmethionine-dependent methyltransferase activity (GO:0008757);; Biological Process: methylation (GO:0032259);;	--	--	--	--	SAM dependent carboxyl methyltransferase	Salicylate carboxymethyltransferase OS=Clarkia breweri OX=36903 GN=SAMT PE=1 SV=1	PREDICTED: salicylate carboxymethyltransferase [Cucumis sativus]
Csa4G047970	0.929814	1.71921	1.2606	0.120278	0	0.028993	0.114937	0.311073	0.238168	-4.29777	down	-2.50228	down	--	--	--	--	--	--	--	--	--	B3 DNA binding domain	B3 domain-containing protein Os04g0581400 OS=Oryza sativa subsp. japonica OX=39947 GN=Os04g0581400 PE=3 SV=2	hypothetical protein Csa_4G047970 [Cucumis sativus]
Csa4G051480	4.35497	8.13003	4.76454	0.651891	1.05811	1.4083	0	0.142836	0	-2.43609	down	-6.63792	down	--	--	--	--	Molecular Function: serine-type endopeptidase activity (GO:0004252);; Molecular Function: identical protein binding (GO:0042802);; Biological Process: negative regulation of catalytic activity (GO:0043086);;	--	--	--	--	--	--	hypothetical protein Csa_4G051480 [Cucumis sativus]
Csa4G056620	2.59382	5.64822	2.44007	1.24923	1.06136	1.9897	0.917574	0.59571	0.381454	-1.28856	down	-2.52219	down	-1.22826	down	[V]	Defense mechanisms	Molecular Function: ATP binding (GO:0005524);; Biological Process: obsolete ATP catabolic process (GO:0006200);; Molecular Function: ATPase-coupled organic phosphonate transmembrane transporter activity (GO:0015416);; Cellular Component: membrane (GO:0016020);;	--	--	[Q]	Secondary metabolites biosynthesis, transport and catabolism	ABC-2 type transporter;; ABC transporter;; ABC-2 family transporter protein;; AAA domain, putative AbiEii toxin, Type IV TA system	ABC transporter G family member 14 OS=Arabidopsis thaliana OX=3702 GN=ABCG14 PE=2 SV=1	PREDICTED: ABC transporter G family member 14 [Cucumis sativus]
Csa4G063470	1.05256	17.7519	0.75201	0.848004	0.859402	0.268018	0.511201	0.996362	0.398218	-3.23334	down	-3.33674	down	--	--	--	--	Biological Process: response to bacterium (GO:0009617);; Biological Process: response to fungus (GO:0009620);; Biological Process: defense response, incompatible interaction (GO:0009814);;	K14508|0|csv:101214577|K14508 regulatory protein NPR1 | (RefSeq) regulatory protein NPR3-like	Plant hormone signal transduction (ko04075)	[R]	General function prediction only	BTB/POZ domain;; Domain of unknown function (DUF3420);; Ankyrin repeats (3 copies);; Ankyrin repeats (many copies);; Ankyrin repeat	Regulatory protein NPR3 OS=Arabidopsis thaliana OX=3702 GN=NPR3 PE=1 SV=1	hypothetical protein Csa_4G063470 [Cucumis sativus]
Csa4G082380	19.443	12.5434	18.6671	3.34309	9.38458	14.2853	8.37286	9.42699	14.5954	-0.903346	down	-0.710439	down	0.200907	normal	--	--	Cellular Component: cell wall (GO:0005618);;	--	--	--	--	D-mannose binding lectin	EP1-like glycoprotein 3 OS=Arabidopsis thaliana OX=3702 GN=At1g78850 PE=1 SV=1	PREDICTED: epidermis-specific secreted glycoprotein EP1-like isoform X1 [Cucumis sativus]
Csa4G088720	4.78415	11.9494	7.89065	2.83426	3.04352	3.81259	4.71525	4.9194	5.32034	-1.31849	down	-0.764978	down	0.561963	normal	--	--	Biological Process: single-organism developmental process (GO:0044767);; Biological Process: system development (GO:0048731);;	--	--	--	--	TCP family transcription factor	Transcription factor TCP4 OS=Arabidopsis thaliana OX=3702 GN=TCP4 PE=1 SV=1	PREDICTED: transcription factor TCP4, partial [Cucumis sativus]
Csa4G112650	1.08354	2.48988	2.48099	0.733511	0.406998	0.991635	0.403841	0.291554	0.768245	-1.46272	down	-2.08801	down	-0.615623	normal	[Q]	Secondary metabolites biosynthesis, transport and catabolism	Molecular Function: oxidoreductase activity, acting on paired donors, with incorporation or reduction of molecular oxygen, 2-oxoglutarate as one donor, and incorporation of one atom each of oxygen into both donors (GO:0016706);; Biological Process: single-organism metabolic process (GO:0044710);;	--	--	[QR]	Secondary metabolites biosynthesis, transport and catabolism;; General function prediction only	non-haem dioxygenase in morphine synthesis N-terminal;; 2OG-Fe(II) oxygenase superfamily	Protein DMR6-LIKE OXYGENASE 2 OS=Arabidopsis thaliana OX=3702 GN=DLO2 PE=2 SV=1	PREDICTED: flavonol synthase/flavanone 3-hydroxylase-like [Cucumis sativus]
Csa4G123320	1.25228	2.49331	3.54861	0.774776	0.916964	1.4165	1.27973	1.32776	0.814484	-1.20089	down	-1.12598	down	0.0843202	normal	--	--	--	--	--	--	--	--	--	hypothetical protein Csa_4G123320 [Cucumis sativus]
Csa4G141240	59.3259	45.5339	47.0167	28.0761	31.4219	23.7343	25.229	22.6428	15.714	-0.855857	down	-1.313	down	-0.449591	normal	--	--	--	--	--	--	--	Probable lipid transfer;; Protease inhibitor/seed storage/LTP family	Probable non-specific lipid-transfer protein AKCS9 OS=Vigna unguiculata OX=3917 PE=2 SV=1	hypothetical protein Csa_4G141240 [Cucumis sativus]
Csa4G146240	223.721	203.79	159.326	141.458	108.963	123.254	57.5688	46.2051	20.0282	-0.639872	down	-2.30091	down	-1.6552	down	--	--	--	--	--	--	--	Probable lipid transfer;; Protease inhibitor/seed storage/LTP family	Probable non-specific lipid-transfer protein AKCS9 OS=Vigna unguiculata OX=3917 PE=2 SV=1	PREDICTED: non-specific lipid-transfer protein 2-like [Cucumis sativus]
Csa4G188400	2.68682	6.8144	5.15837	1.90685	1.60317	1.99544	3.6861	2.71856	3.15131	-1.39983	down	-0.672068	down	0.736312	up	[K]	Transcription	Molecular Function: protein kinase activity (GO:0004672);; Molecular Function: protein serine/threonine kinase activity (GO:0004674);; Molecular Function: ATP binding (GO:0005524);; Cellular Component: plasma membrane (GO:0005886);; Biological Process: protein phosphorylation (GO:0006468);; Biological Process: transmembrane receptor protein tyrosine kinase signaling pathway (GO:0007169);; Biologi…	--	--	--	--	Protein tyrosine kinase;; Protein kinase domain;; Leucine rich repeat;; Leucine Rich repeats (2 copies);; Leucine Rich Repeat	Probable inactive leucine-rich repeat receptor-like protein kinase At3g03770 OS=Arabidopsis thaliana OX=3702 GN=At3g03770 PE=2 SV=1	PREDICTED: probable inactive leucine-rich repeat receptor-like protein kinase At3g03770 [Cucumis sativus]
Csa4G190010	21.1611	19.621	20.7259	13.5638	10.8765	14.3312	5.89036	7.15369	5.27132	-0.649822	down	-1.80007	down	-1.14262	down	--	--	Molecular Function: transferase activity, transferring acyl groups (GO:0016746);;	K13065|5.09506e-84|csv:101202947|K13065 shikimate O-hydroxycinnamoyltransferase [EC:2.3.1.133] | (RefSeq) spermidine hydroxycinnamoyl transferase	Phenylpropanoid biosynthesis (ko00940);; Flavonoid biosynthesis (ko00941);; Stilbenoid, diarylheptanoid and gingerol biosynthesis (ko00945)	--	--	Transferase family	Shikimate O-hydroxycinnamoyltransferase OS=Nicotiana tabacum OX=4097 GN=HST PE=1 SV=1	hypothetical protein Csa_4G190010 [Cucumis sativus]
Csa4G190020	76.0653	63.7625	65.9087	39.8824	33.3683	43.3224	17.8843	21.9969	18.6947	-0.808926	down	-1.87149	down	-1.05535	down	--	--	Molecular Function: N-acyltransferase activity (GO:0016410);;	K13065|0|csv:101202947|K13065 shikimate O-hydroxycinnamoyltransferase [EC:2.3.1.133] | (RefSeq) spermidine hydroxycinnamoyl transferase	Phenylpropanoid biosynthesis (ko00940);; Flavonoid biosynthesis (ko00941);; Stilbenoid, diarylheptanoid and gingerol biosynthesis (ko00945)	--	--	Transferase family	Spermidine hydroxycinnamoyl transferase OS=Arabidopsis thaliana OX=3702 GN=SHT PE=1 SV=1	PREDICTED: spermidine hydroxycinnamoyl transferase [Cucumis sativus]
Csa4G192110	2.73057	10.8468	8.79259	2.08791	4.29578	3.20103	3.64811	3.55328	4.09229	-1.18513	down	-1.02496	down	0.171265	normal	[E]	Amino acid transport and metabolism	Molecular Function: glutamate dehydrogenase [NAD(P)+] activity (GO:0004353);; Molecular Function: copper ion binding (GO:0005507);; Molecular Function: ATP binding (GO:0005524);; Cellular Component: mitochondrion (GO:0005739);; Biological Process: cellular amino acid metabolic process (GO:0006520);; Molecular Function: zinc ion binding (GO:0008270);; Biological Process: response to absence of lig…	K00261|0|csv:101221948|K00261 glutamate dehydrogenase (NAD(P)+) [EC:1.4.1.3] | (RefSeq) glutamate dehydrogenase 1	Arginine biosynthesis (ko00220);; Alanine, aspartate and glutamate metabolism (ko00250);; Nitrogen metabolism (ko00910);; Carbon metabolism (ko01200)	[E]	Amino acid transport and metabolism	Glutamate/Leucine/Phenylalanine/Valine dehydrogenase;; Glu/Leu/Phe/Val dehydrogenase, dimerisation domain	Glutamate dehydrogenase 1 OS=Arabidopsis thaliana OX=3702 GN=GDH1 PE=2 SV=1	PREDICTED: glutamate dehydrogenase 1 [Cucumis sativus]
Csa4G243390	126.584	48.8162	53.0952	34.1391	21.7604	24.8557	32.0487	20.2992	19.7984	-1.50458	down	-1.73811	down	-0.22838	normal	--	--	--	--	--	--	--	--	--	hypothetical protein Csa_4G243390 [Cucumis sativus]
Csa4G256430	2.00858	2.65542	1.82122	1.1237	1.2769	1.05211	0.609107	0.795673	1.13627	-0.883999	down	-1.3993	down	-0.506884	normal	[T]	Signal transduction mechanisms	Molecular Function: protein binding (GO:0005515);; Cellular Component: nucleus (GO:0005634);; Cellular Component: cytoplasm (GO:0005737);; Biological Process: induced systemic resistance, jasmonic acid mediated signaling pathway (GO:0009864);; Biological Process: polarity specification of adaxial/abaxial axis (GO:0009944);; Biological Process: proximal/distal pattern formation (GO:0009954);; Biol…	K14508|0|csv:101215628|K14508 regulatory protein NPR1 | (RefSeq) regulatory protein NPR5-like	Plant hormone signal transduction (ko04075)	[R]	General function prediction only	Domain of unknown function (DUF3420);; BTB/POZ domain;; Ankyrin repeats (3 copies);; Ankyrin repeat;; Ankyrin repeats (many copies);; Ankyrin repeat;; Ankyrin repeats (many copies)	Regulatory protein NPR5 OS=Arabidopsis thaliana OX=3702 GN=NPR5 PE=1 SV=1	PREDICTED: regulatory protein NPR5-like [Cucumis sativus]
Csa4G287550	0.41299	7.72533	1.95909	0.346051	1.86525	0.596331	0.622365	0.294865	0.644435	-1.799	down	-2.76193	down	-0.950639	normal	--	--	Biological Process: nitrogen compound metabolic process (GO:0006807);; Biological Process: lipid biosynthetic process (GO:0008610);; Biological Process: monocarboxylic acid metabolic process (GO:0032787);; Biological Process: cellular biosynthetic process (GO:0044249);; Biological Process: cellular lipid metabolic process (GO:0044255);; Biological Process: carboxylic acid biosynthetic process (GO…	K00454|1.07431e-92|csv:101215116|K00454 lipoxygenase [EC:1.13.11.12] | (RefSeq) lipoxygenase 2, chloroplastic-like	Linoleic acid metabolism (ko00591);; alpha-Linolenic acid metabolism (ko00592)	--	--	Lipoxygenase	Linoleate 13S-lipoxygenase 2-1, chloroplastic OS=Solanum tuberosum OX=4113 GN=LOX2.1 PE=1 SV=1	hypothetical protein Csa_4G287550 [Cucumis sativus]
Csa4G292470	1.239	1.27772	1.34679	0.191922	0.405236	0.470108	0.37527	0.124358	0.277868	-1.80583	down	-2.34153	down	--	--	--	--	Biological Process: metabolic process (GO:0008152);;	K09284|0|csv:101211008|K09284 AP2-like factor, euAP2 lineage | (RefSeq) ethylene-responsive transcription factor RAP2-7-like	--	--	--	AP2 domain	Floral homeotic protein APETALA 2 OS=Arabidopsis thaliana OX=3702 GN=AP2 PE=1 SV=1	PREDICTED: ethylene-responsive transcription factor RAP2-7-like [Cucumis sativus]
Csa4G293210	0.721475	2.66967	3.09371	0.523764	0.547836	0.927943	0.564596	0.434694	0.827056	-1.65955	down	-1.85682	down	--	--	--	--	--	--	--	--	--	--	Probable membrane-associated kinase regulator 4 OS=Arabidopsis thaliana OX=3702 GN=MAKR4 PE=3 SV=1	hypothetical protein Csa_4G293210 [Cucumis sativus]
Csa4G294940	46.135	25.2294	51.1802	23.4672	19.8995	35.5157	13.7851	12.3371	18.8203	-0.629284	down	-1.5138	down	-0.876161	down	--	--	--	--	--	--	--	Fusaric acid resistance protein-like;; Fusaric acid resistance protein family	--	PREDICTED: uncharacterized protein LOC101207339 [Cucumis sativus]
Csa4G295460	2.32737	4.82858	4.68822	0.92234	1.73609	1.25174	1.4568	0.853638	1.43827	-1.52503	down	-1.67456	down	-0.140059	normal	--	--	--	--	--	--	--	Dof domain, zinc finger	Dof zinc finger protein DOF5.1 OS=Arabidopsis thaliana OX=3702 GN=DOF5.1 PE=2 SV=1	PREDICTED: dof zinc finger protein DOF3.6-like isoform X1 [Cucumis sativus]
Csa4G296840	0.952924	2.73188	1.16215	0.327342	0.253146	0.454823	0.744615	0.468242	0.671942	-2.17977	down	-1.39688	down	--	--	[Q]	Secondary metabolites biosynthesis, transport and catabolism	Molecular Function: alditol:NADP+ 1-oxidoreductase activity (GO:0004032);; Cellular Component: nucleus (GO:0005634);; Cellular Component: cytosol (GO:0005829);; Biological Process: response to cold (GO:0009409);; Biological Process: response to water deprivation (GO:0009414);; Cellular Component: chloroplast (GO:0009507);; Biological Process: response to salt stress (GO:0009651);; Molecular Funct…	--	--	[R]	General function prediction only	Aldo/keto reductase family	NADPH-dependent aldo-keto reductase, chloroplastic OS=Arabidopsis thaliana OX=3702 GN=AKR4C9 PE=1 SV=1	hypothetical protein Csa_4G296840 [Cucumis sativus]
Csa4G326550	78.484	63.7698	66.2033	34.232	43.3598	44.8803	7.48461	11.6418	12.1349	-0.758362	down	-2.79829	down	-2.03191	down	[E]	Amino acid transport and metabolism	Cellular Component: mitochondrion (GO:0005739);; Biological Process: metabolic process (GO:0008152);; Molecular Function: alanine-glyoxylate transaminase activity (GO:0008453);; Molecular Function: pyridoxal phosphate binding (GO:0030170);;	K00827|0|csv:101210304|K00827 alanine-glyoxylate transaminase / (R)-3-amino-2-methylpropionate-pyruvate transaminase [EC:2.6.1.44 2.6.1.40] | (RefSeq) alanine--glyoxylate aminotransferase 2 homolog 2, mitochondrial-like	Alanine, aspartate and glutamate metabolism (ko00250);; Glycine, serine and threonine metabolism (ko00260);; Cysteine and methionine metabolism (ko00270);; Valine, leucine and isoleucine degradation (ko00280)	[E]	Amino acid transport and metabolism	Aminotransferase class-III	Alanine--glyoxylate aminotransferase 2 homolog 2, mitochondrial OS=Arabidopsis thaliana OX=3702 GN=AGT3 PE=1 SV=2	PREDICTED: alanine--glyoxylate aminotransferase 2 homolog 2, mitochondrial-like [Cucumis sativus]
Csa4G415920	1.34332	2.6275	1.83224	0.56429	0.728493	0.919873	1.28556	0.608349	0.804384	-1.3598	down	-1.14985	down	0.216785	normal	[G]	Carbohydrate transport and metabolism	Molecular Function: transferase activity, transferring glycosyl groups (GO:0016757);;	K13495|0|csv:101209480|K13495 cis-zeatin O-glucosyltransferase [EC:2.4.1.215] | (RefSeq) zeatin O-glucosyltransferase-like	Zeatin biosynthesis (ko00908)	[GC]	Carbohydrate transport and metabolism;; Energy production and conversion	UDP-glucoronosyl and UDP-glucosyl transferase	Zeatin O-glucosyltransferase OS=Phaseolus lunatus OX=3884 GN=ZOG1 PE=2 SV=1	PREDICTED: zeatin O-glucosyltransferase-like [Cucumis sativus]
Csa4G420210	1.25077	2.49782	3.73459	0.497205	0.623138	1.2471	0.698251	0.610503	1.05136	-1.63027	down	-1.70614	down	-0.0653756	normal	--	--	Cellular Component: chloroplast (GO:0009507);; Cellular Component: membrane (GO:0016020);;	--	--	--	--	EamA-like transporter family	WAT1-related protein At5g07050 OS=Arabidopsis thaliana OX=3702 GN=At5g07050 PE=2 SV=1	hypothetical protein Csa_4G420210 [Cucumis sativus]
Csa4G430820	2.58618	29.1732	13.9124	3.06668	5.61731	2.87439	7.69923	6.37196	6.95285	-1.92783	down	-1.14109	down	0.797841	up	--	--	Cellular Component: cytoplasm (GO:0005737);; Biological Process: gravitropism (GO:0009630);; Biological Process: flower development (GO:0009908);; Cellular Component: basal plasma membrane (GO:0009925);; Biological Process: auxin polar transport (GO:0009926);; Biological Process: xylem and phloem pattern formation (GO:0010051);; Biological Process: inflorescence development (GO:0010229);; Biologi…	K13947|0|csv:101218388|K13947 auxin efflux carrier family | (RefSeq) CsPIN4; probable auxin efflux carrier component 1b	--	--	--	Membrane transport protein	Probable auxin efflux carrier component 1c OS=Oryza sativa subsp. japonica OX=39947 GN=PIN1C PE=2 SV=1	PREDICTED: probable auxin efflux carrier component 1b [Cucumis sativus]
Csa4G443110	2.50915	6.36701	7.71789	0.540232	1.78644	2.75585	0.474756	0.152696	0.343168	-1.67797	down	-4.06597	down	--	--	--	--	Molecular Function: peroxidase activity (GO:0004601);; Cellular Component: extracellular region (GO:0005576);; Biological Process: polyamine catabolic process (GO:0006598);; Biological Process: response to oxidative stress (GO:0006979);; Biological Process: phenylpropanoid metabolic process (GO:0009698);; Biological Process: response to nitrate (GO:0010167);; Biological Process: nitrate transport…	K00430|0|csv:101202852|K00430 peroxidase [EC:1.11.1.7] | (RefSeq) peroxidase 47	Phenylpropanoid biosynthesis (ko00940)	--	--	Peroxidase	Peroxidase 47 OS=Arabidopsis thaliana OX=3702 GN=PER47 PE=2 SV=2	PREDICTED: peroxidase 47 [Cucumis sativus]
Csa4G454150	8.036	11.3623	10.4893	5.07816	5.84547	7.10565	4.18248	4.58069	5.68885	-0.698252	down	-1.11718	down	-0.410653	normal	--	--	Molecular Function: nucleotide binding (GO:0000166);; Molecular Function: protein kinase activity (GO:0004672);; Cellular Component: nucleus (GO:0005634);; Cellular Component: cytoplasm (GO:0005737);; Biological Process: phosphorylation (GO:0016310);; Biological Process: defense response to bacterium (GO:0042742);;	K14498|0|csv:101209540|K14498 serine/threonine-protein kinase SRK2 [EC:2.7.11.1] | (RefSeq) serine/threonine-protein kinase SRK2G-like	Plant hormone signal transduction (ko04075)	[T]	Signal transduction mechanisms	Protein kinase domain;; Protein tyrosine kinase	Serine/threonine-protein kinase SAPK7 OS=Oryza sativa subsp. japonica OX=39947 GN=SAPK7 PE=2 SV=2	hypothetical protein Csa_4G454150 [Cucumis sativus]
Csa4G551130	17.2049	9.27544	13.386	7.29031	7.28853	7.65979	0.994192	1.56786	0.892122	-0.835172	down	-3.5815	down	-2.73872	down	[Q]	Secondary metabolites biosynthesis, transport and catabolism	Molecular Function: 5-methyltetrahydropteroyltriglutamate-homocysteine S-methyltransferase activity (GO:0003871);; Cellular Component: cytosol (GO:0005829);; Cellular Component: plasma membrane (GO:0005886);; Molecular Function: methionine synthase activity (GO:0008705);; Biological Process: methionine biosynthetic process (GO:0009086);; Cellular Component: plasmodesma (GO:0009506);; Cellular Com…	K13356|0|csv:101212401|K13356 alcohol-forming fatty acyl-CoA reductase [EC:1.2.1.84] | (RefSeq) fatty acyl-CoA reductase 2	Cutin, suberine and wax biosynthesis (ko00073);; Peroxisome (ko04146)	[I]	Lipid transport and metabolism	Male sterility protein;; Male sterility protein;; NAD dependent epimerase/dehydratase family	Fatty acyl-CoA reductase 2 OS=Arabidopsis thaliana OX=3702 GN=FAR2 PE=1 SV=2	PREDICTED: fatty acyl-CoA reductase 2 [Cucumis sativus]
Csa4G608090	1.11552	2.7881	1.5316	0.742973	1.20094	0.594175	1.07038	0.232397	0.523733	-0.94801	down	-1.51481	down	-0.559371	normal	--	--	Molecular Function: GTPase activity (GO:0003924);; Molecular Function: ATP binding (GO:0005524);; Cellular Component: cytoplasm (GO:0005737);; Biological Process: obsolete GTP catabolic process (GO:0006184);; Cellular Component: integral component of membrane (GO:0016021);; Molecular Function: nickel cation binding (GO:0016151);; Molecular Function: metallochaperone activity (GO:0016530);; Molecu…	--	--	[T]	Signal transduction mechanisms	Eukaryotic cytochrome b561	Cytochrome b561 domain-containing protein At4g18260 OS=Arabidopsis thaliana OX=3702 GN=At4g18260 PE=2 SV=1	PREDICTED: cytochrome b561 domain-containing protein At4g18260-like [Cucumis melo]
Csa4G617410	2.82217	5.44683	4.69648	1.1686	1.63511	2.34199	1.13607	1.2673	1.78197	-1.33172	down	-1.69601	down	-0.355581	normal	[G]	Carbohydrate transport and metabolism	Molecular Function: UDP-glycosyltransferase activity (GO:0008194);; Molecular Function: transferase activity, transferring hexosyl groups (GO:0016758);;	--	--	[GC]	Carbohydrate transport and metabolism;; Energy production and conversion	UDP-glucoronosyl and UDP-glucosyl transferase	UDP-glycosyltransferase 82A1 OS=Arabidopsis thaliana OX=3702 GN=UGT82A1 PE=2 SV=1	PREDICTED: UDP-glycosyltransferase 82A1 [Cucumis sativus]
Csa4G621160	1.0987	3.43881	2.13219	0.960166	1.00114	1.07238	1.55266	1.06667	0.900713	-0.899404	down	-0.755617	down	0.152234	normal	--	--	Cellular Component: 1,3-beta-D-glucan synthase complex (GO:0000148);; Molecular Function: 1,3-beta-D-glucan synthase activity (GO:0003843);; Biological Process: (1->3)-beta-D-glucan biosynthetic process (GO:0006075);; Biological Process: chromatin silencing (GO:0006342);; Biological Process: membrane fusion (GO:0006944);; Biological Process: microsporogenesis (GO:0009556);; Biological Process: RN…	K11000|0|csv:101218479|K11000 callose synthase [EC:2.4.1.-] | (RefSeq) putative callose synthase 8	--	[M]	Cell wall/membrane/envelope biogenesis	1,3-beta-glucan synthase component;; 1,3-beta-glucan synthase subunit FKS1, domain-1;; Vta1 like	Putative callose synthase 8 OS=Arabidopsis thaliana OX=3702 GN=CALS8 PE=3 SV=2	hypothetical protein Csa_4G621160 [Cucumis sativus]
Csa4G625060	198.297	100.355	128.571	59.3143	43.9584	57.6006	2.89088	6.34342	3.10989	-1.10315	down	-5.05294	down	-3.94345	down	--	--	Biological Process: developmental process (GO:0032502);;	--	--	--	--	--	--	PREDICTED: ctenidin-3-like [Cucumis sativus]
Csa4G628330	0.96307	6.50455	2.25162	0	0	0.749649	0.241409	0	0	-3.64944	down	-5.28739	down	--	--	--	--	Molecular Function: DNA binding (GO:0003677);; Biological Process: regulation of transcription, DNA-templated (GO:0006355);; Biological Process: biosynthetic process (GO:0009058);; Biological Process: plastid organization (GO:0009657);; Biological Process: embryo development ending in seed dormancy (GO:0009793);; Biological Process: leaf morphogenesis (GO:0009965);; Biological Process: cellular p…	--	--	--	--	TCP family transcription factor	Transcription factor TCP4 OS=Arabidopsis thaliana OX=3702 GN=TCP4 PE=1 SV=1	PREDICTED: transcription factor TCP4 [Cucumis sativus]
Csa4G629480	12.2191	22.5623	9.06534	8.43923	7.90055	6.53412	4.64247	4.88333	4.19316	-0.914385	down	-1.72361	down	-0.8023	down	--	--	--	--	--	--	--	No apical meristem (NAM) protein	Protein CUP-SHAPED COTYLEDON 2 OS=Arabidopsis thaliana OX=3702 GN=NAC098 PE=1 SV=1	PREDICTED: protein CUP-SHAPED COTYLEDON 2-like [Cucumis sativus]
Csa4G639870	221.209	153.015	125.173	114.112	92.3244	84.3122	56.412	82.0617	46.592	-0.774436	down	-1.49458	down	-0.71401	down	[I]	Lipid transport and metabolism	Cellular Component: vacuole (GO:0005773);; Cellular Component: membrane (GO:0016020);; Molecular Function: hydrolase activity (GO:0016787);;	--	--	[I]	Lipid transport and metabolism	Lipase (class 3);; Protein of unknown function (DUF2974)	Phospholipase A1-IIalpha OS=Arabidopsis thaliana OX=3702 GN=At1g06250 PE=2 SV=1	PREDICTED: uncharacterized protein LOC101203640 [Cucumis sativus]
Csa4G642290	0.545606	1.80919	1.94786	0.33913	0.210477	0.468108	0.23559	0.317843	0.171375	-2.03496	down	-2.57912	down	--	--	[QV]	Secondary metabolites biosynthesis, transport and catabolism;; Defense mechanisms	Molecular Function: monooxygenase activity (GO:0004497);; Molecular Function: oxidoreductase activity, acting on paired donors, with incorporation or reduction of molecular oxygen (GO:0016705);; Molecular Function: metal ion binding (GO:0046872);;	--	--	[Q]	Secondary metabolites biosynthesis, transport and catabolism	Cytochrome P450	Isoflavone 2&apos;-hydroxylase OS=Glycyrrhiza echinata OX=46348 GN=CYP81E1 PE=1 SV=2	PREDICTED: isoflavone 2&apos;-hydroxylase-like [Cucumis sativus]
Csa4G642400	3.35666	6.69016	5.24104	2.69451	2.3973	2.2678	1.35936	1.75288	1.43425	-1.08776	down	-1.8609	down	-0.764934	normal	--	--	Molecular Function: hydrolase activity, hydrolyzing O-glycosyl compounds (GO:0004553);; Cellular Component: intracellular (GO:0005622);; Biological Process: carbohydrate metabolic process (GO:0005975);;	--	--	--	--	--	--	PREDICTED: uncharacterized protein LOC105435309 [Cucumis sativus]
Csa4G642430	10.4513	7.07775	5.89869	2.66521	4.87059	4.59176	1.85411	2.43492	2.5991	-0.944141	down	-1.8232	down	-0.871928	down	--	--	--	--	--	--	--	Lateral organ boundaries (LOB) domain	LOB domain-containing protein 38 OS=Arabidopsis thaliana OX=3702 GN=LBD38 PE=1 SV=1	PREDICTED: LOB domain-containing protein 39-like [Cucumis sativus]
Csa4G644740	2.68661	13.3212	7.65743	2.01301	2.27583	3.79577	3.30958	2.67497	3.15907	-1.56241	down	-1.46883	down	0.102302	normal	--	--	Biological Process: transcription, DNA-templated (GO:0006351);; Biological Process: anatomical structure morphogenesis (GO:0009653);; Biological Process: tissue development (GO:0009888);; Biological Process: regulation of gene expression (GO:0010468);; Biological Process: single-organism cellular process (GO:0044763);; Biological Process: single-organism developmental process (GO:0044767);; Biolo…	K09285|0|csv:101212143|K09285 AP2-like factor, ANT lineage | (RefSeq) AP2-like ethylene-responsive transcription factor ANT	--	--	--	AP2 domain	AP2-like ethylene-responsive transcription factor ANT OS=Arabidopsis thaliana OX=3702 GN=ANT PE=1 SV=2	PREDICTED: AP2-like ethylene-responsive transcription factor ANT isoform X1 [Cucumis sativus]
Csa4G645830	3.69428	9.69115	7.84431	3.70798	3.62181	4.447	2.5799	2.76394	2.90127	-0.819151	down	-1.40688	down	-0.579078	normal	--	--	Biological Process: cell fate specification (GO:0001708);; Molecular Function: transcription factor activity, sequence-specific DNA binding (GO:0003700);; Cellular Component: nucleus (GO:0005634);; Biological Process: regulation of transcription, DNA-templated (GO:0006355);; Biological Process: determination of bilateral symmetry (GO:0009855);; Biological Process: animal organ morphogenesis (GO:0…	--	--	[K]	Transcription	KNOX2 domain;; KNOX1 domain;; Homeobox KN domain;; ELK domain;; Homeobox domain	Homeobox protein knotted-1-like 2 OS=Malus domestica OX=3750 PE=2 SV=1	PREDICTED: homeobox protein knotted-1-like 2 [Cucumis sativus]
Csa4G645880	45.983	25.7117	24.5981	20.7832	16.0554	20.4203	10.363	11.2752	10.9017	-0.748118	down	-1.63338	down	-0.879366	down	--	--	Cellular Component: mitochondrion (GO:0005739);; Cellular Component: endosome (GO:0005768);; Cellular Component: Golgi apparatus (GO:0005794);; Cellular Component: trans-Golgi network (GO:0005802);; Molecular Function: acetylglucosaminyltransferase activity (GO:0008375);; Cellular Component: membrane (GO:0016020);;	--	--	--	--	Core-2/I-Branching enzyme	--	PREDICTED: uncharacterized protein LOC101205668 [Cucumis sativus]
Csa4G663670	5.43412	6.33875	6.64076	4.23344	3.84126	3.78824	3.63222	4.44133	3.80566	-0.602543	down	-0.679156	down	-0.0681107	normal	--	--	--	K11723|0|csv:101217603|K11723 bromodomain-containing protein 7/9 | (RefSeq) uncharacterized LOC101217603	--	[R]	General function prediction only	Bromodomain	Transcription factor GTE11 OS=Arabidopsis thaliana OX=3702 GN=GTE11 PE=1 SV=1	PREDICTED: uncharacterized protein LOC101217603 [Cucumis sativus]
Csa4G664420	0.804905	2.27875	0.893017	0.279816	0.22718	0.443537	0.380223	0.381948	0.318876	-2.01529	down	-1.89559	down	--	--	[O]	Posttranslational modification, protein turnover, chaperones	Cellular Component: plant-type vacuole (GO:0000325);; Cellular Component: cell wall (GO:0005618);; Cellular Component: nucleus (GO:0005634);; Biological Process: proteolysis (GO:0006508);; Molecular Function: cysteine-type peptidase activity (GO:0008234);; Biological Process: regulation of meristem growth (GO:0010075);; Biological Process: glucuronoxylan metabolic process (GO:0010413);; Biologica…	K16290|0|csv:101205826|K16290 xylem cysteine proteinase [EC:3.4.22.-] | (RefSeq) xylem cysteine proteinase 2	--	[O]	Posttranslational modification, protein turnover, chaperones	Papain family cysteine protease;; Cathepsin propeptide inhibitor domain (I29);; Peptidase C1-like family	Cysteine protease XCP1 OS=Arabidopsis thaliana OX=3702 GN=XCP1 PE=1 SV=1	PREDICTED: xylem cysteine proteinase 2 [Cucumis sativus]
Csa5G031450	0.921593	0.615258	0.54407	0.022784	0.095858	0.082325	0.209984	0.056368	0.251643	-3.20288	down	-2.03212	down	--	--	[G]	Carbohydrate transport and metabolism	Biological Process: maltose metabolic process (GO:0000023);; Molecular Function: phosphoacetylglucosamine mutase activity (GO:0004610);; Molecular Function: phosphoglucomutase activity (GO:0004614);; Molecular Function: phosphomannomutase activity (GO:0004615);; Cellular Component: cytosol (GO:0005829);; Biological Process: UDP-N-acetylglucosamine biosynthetic process (GO:0006048);; Cellular Comp…	--	--	[G]	Carbohydrate transport and metabolism	Phosphoglucomutase/phosphomannomutase, alpha/beta/alpha domain I;; Phosphoglucomutase/phosphomannomutase, alpha/beta/alpha domain II;; Phosphoglucomutase/phosphomannomutase, alpha/beta/alpha domain III	--	PREDICTED: uncharacterized protein LOC101207539 [Cucumis sativus]
Csa5G054570	28.068	18.48	15.7195	9.42792	10.8247	10.2103	1.03909	1.89248	0.899434	-1.12546	down	-3.98156	down	-2.84956	down	[IQR]	Lipid transport and metabolism;; Secondary metabolites biosynthesis, transport and catabolism;; General function prediction only	Biological Process: very long-chain fatty acid metabolic process (GO:0000038);; Cellular Component: cytosol (GO:0005829);; Biological Process: folic acid-containing compound metabolic process (GO:0006760);; Biological Process: response to cold (GO:0009409);; Cellular Component: chloroplast (GO:0009507);; Molecular Function: oxidoreductase activity, acting on the CH-OH group of donors, NAD or NADP…	--	--	[R]	General function prediction only	short chain dehydrogenase;; Enoyl-(Acyl carrier protein) reductase;; KR domain	NADPH-dependent pterin aldehyde reductase OS=Arabidopsis thaliana OX=3702 GN=At1g10310 PE=1 SV=1	PREDICTED: NADPH-dependent pterin aldehyde reductase-like [Cucumis sativus]
Csa5G065660	13.3399	6.48542	9.66938	6.02686	5.07913	6.23811	4.3263	3.12526	2.99674	-0.774785	down	-1.53832	down	-0.755907	down	--	--	Molecular Function: transcription factor activity, sequence-specific DNA binding (GO:0003700);; Cellular Component: nucleus (GO:0005634);; Biological Process: regulation of transcription, DNA-templated (GO:0006355);; Molecular Function: sequence-specific DNA binding (GO:0043565);;	K09338|1.26466e-142|csv:101222713|K09338 homeobox-leucine zipper protein | (RefSeq) homeobox-leucine zipper protein HOX3-like	--	[K]	Transcription	Homeobox domain;; Homeobox associated leucine zipper;; Homeobox KN domain	Homeobox-leucine zipper protein HOX3 OS=Oryza sativa subsp. japonica OX=39947 GN=HOX3 PE=1 SV=1	PREDICTED: homeobox-leucine zipper protein HOX3-like isoform X1 [Cucumis sativus]
Csa5G092930	1.00214	4.79169	2.39809	1.49846	1.02815	1.09988	1.14885	1.26154	1.60214	-1.13871	down	-1.07491	down	0.071335	normal	--	--	Molecular Function: binding (GO:0005488);; Cellular Component: nucleus (GO:0005634);; Biological Process: regulation of transcription, DNA-templated (GO:0006355);; Biological Process: detection of gravity (GO:0009590);; Biological Process: positive gravitropism (GO:0009958);; Biological Process: negative gravitropism (GO:0009959);; Biological Process: circumnutation (GO:0010031);; Molecular Funct…	--	--	[R]	General function prediction only	--	Protein SHOOT GRAVITROPISM 5 OS=Arabidopsis thaliana OX=3702 GN=SGR5 PE=1 SV=1	PREDICTED: protein SHOOT GRAVITROPISM 5 [Cucumis sativus]
Csa5G114570	19.9948	78.1874	47.7996	18.1572	24.4024	26.4076	19.8609	14.0114	17.4411	-1.05111	down	-1.54648	down	-0.486274	normal	--	--	Biological Process: polysaccharide biosynthetic process (GO:0000271);; Cellular Component: extracellular region (GO:0005576);; Cellular Component: plasma membrane (GO:0005886);; Biological Process: defense response (GO:0006952);; Biological Process: pattern specification process (GO:0007389);; Biological Process: regulation of cell size (GO:0008361);; Cellular Component: plant-type cell wall (GO:…	--	--	--	--	Gamma-thionin family	Defensin-like protein 1 OS=Arabidopsis thaliana OX=3702 GN=PDF2.3 PE=2 SV=1	PREDICTED: defensin J1-2-like [Cucumis sativus]
Csa5G139210	1.26582	4.55497	3.04534	0.642059	0.778704	0.906837	0.433653	0.1137	0.623136	-1.8819	down	-2.92758	down	--	--	--	--	--	--	--	--	--	Dof domain, zinc finger	Dof zinc finger protein DOF4.6 OS=Arabidopsis thaliana OX=3702 GN=DOF4.6 PE=2 SV=2	hypothetical protein Csa_5G139210 [Cucumis sativus]
Csa5G139730	44.8911	35.3964	64.7751	8.65247	22.7198	20.7808	2.4967	5.69812	20.5353	-1.46385	down	-2.40313	down	-0.927236	normal	--	--	Biological Process: polysaccharide catabolic process (GO:0000272);; Molecular Function: hydrolase activity, hydrolyzing O-glycosyl compounds (GO:0004553);; Molecular Function: chitinase activity (GO:0004568);; Cellular Component: extracellular space (GO:0005615);; Biological Process: carbohydrate metabolic process (GO:0005975);; Biological Process: chitin catabolic process (GO:0006032);;	K01183|9.69186e-164|csv:101219497|K01183 chitinase [EC:3.2.1.14] | (RefSeq) acidic endochitinase-like	Amino sugar and nucleotide sugar metabolism (ko00520)	[M]	Cell wall/membrane/envelope biogenesis	Glycosyl hydrolases family 18	Acidic endochitinase OS=Cucumis sativus OX=3659 PE=1 SV=1	PREDICTED: acidic endochitinase-like [Cucumis sativus]
Csa5G148830	1.28577	1.54807	1.50624	0.818953	0.538535	0.746069	0.220456	0.270761	0.375732	-1.0092	down	-2.32281	down	--	--	--	--	Cellular Component: plasma membrane (GO:0005886);; Biological Process: carbohydrate transport (GO:0008643);; Cellular Component: chloroplast (GO:0009507);; Cellular Component: integral component of membrane (GO:0016021);;	K15382|1.30388e-166|csv:101206775|K15382 solute carrier family 50 (sugar transporter) | (RefSeq) bidirectional sugar transporter SWEET4-like	--	[R]	General function prediction only	Sugar efflux transporter for intercellular exchange	Bidirectional sugar transporter SWEET4 OS=Oryza sativa subsp. japonica OX=39947 GN=SWEET4 PE=2 SV=1	PREDICTED: bidirectional sugar transporter SWEET4-like [Cucumis sativus]
Csa5G154210	5.32789	3.33613	3.16079	1.88891	1.70539	2.51091	0.214721	0.414728	0.367305	-0.945494	down	-3.61913	down	-2.66675	down	[P]	Inorganic ion transport and metabolism	Molecular Function: copper-exporting ATPase activity (GO:0004008);; Molecular Function: glutathione peroxidase activity (GO:0004602);; Molecular Function: copper ion binding (GO:0005507);; Molecular Function: ATP binding (GO:0005524);; Cellular Component: plasma membrane (GO:0005886);; Biological Process: response to oxidative stress (GO:0006979);; Biological Process: response to zinc ion (GO:001…	K17686|0|csv:101220448|K17686 Cu+-exporting ATPase [EC:3.6.3.54] | (RefSeq) HMA5.1; probable copper-transporting ATPase HMA5	--	[P]	Inorganic ion transport and metabolism	E1-E2 ATPase;; haloacid dehalogenase-like hydrolase;; Heavy-metal-associated domain	Probable copper-transporting ATPase HMA5 OS=Arabidopsis thaliana OX=3702 GN=HMA5 PE=1 SV=2	probable copper-transporting ATPase HMA5 [Cucumis sativus]
Csa5G155510	2.99727	10.6651	7.80487	2.32141	3.18125	2.45944	0.920219	1.49859	1.5213	-1.39483	down	-2.48254	down	-1.07812	down	--	--	--	--	--	--	--	Protein of unknown function (DUF4005);; IQ calmodulin-binding motif	--	PREDICTED: protein IQ-DOMAIN 14 isoform X1 [Cucumis sativus]
Csa5G161900	3.59606	11.9417	5.44787	1.74134	3.58785	3.43645	1.88951	1.90692	2.40136	-1.23176	down	-1.79275	down	-0.551784	normal	--	--	Biological Process: polysaccharide biosynthetic process (GO:0000271);; Molecular Function: chitinase activity (GO:0004568);; Cellular Component: Golgi apparatus (GO:0005794);; Biological Process: glycolytic process (GO:0006096);; Biological Process: calcium ion transport (GO:0006816);; Biological Process: water transport (GO:0006833);; Biological Process: lipid transport (GO:0006869);; Biological…	--	--	--	--	Hydrophobic seed protein;; Protease inhibitor/seed storage/LTP family	Lipid transfer protein EARLI 1 OS=Arabidopsis thaliana OX=3702 GN=EARLI1 PE=1 SV=1	PREDICTED: 14 kDa proline-rich protein DC2.15-like [Cucumis sativus]
Csa5G172270	6.17569	15.5855	8.58885	5.7174	4.41878	5.85302	7.0752	3.9943	4.69997	-0.867403	down	-0.988687	down	-0.113918	normal	[Q]	Secondary metabolites biosynthesis, transport and catabolism	Molecular Function: iron ion binding (GO:0005506);; Biological Process: response to red or far red light (GO:0009639);; Biological Process: gibberellin biosynthetic process (GO:0009686);; Biological Process: response to gibberellin (GO:0009739);; Biological Process: unidimensional cell growth (GO:0009826);; Biological Process: flower development (GO:0009908);; Molecular Function: isopenicillin-N …	K05282|0|csv:101212803|K05282 gibberellin 20-oxidase [EC:1.14.11.12] | (RefSeq) GA20OX1; gibberellin 20 oxidase 1-D	Diterpenoid biosynthesis (ko00904)	[QR]	Secondary metabolites biosynthesis, transport and catabolism;; General function prediction only	2OG-Fe(II) oxygenase superfamily;; non-haem dioxygenase in morphine synthesis N-terminal	Gibberellin 20 oxidase 1 OS=Arabidopsis thaliana OX=3702 GN=GA20OX1 PE=2 SV=2	PREDICTED: gibberellin 20 oxidase 1-D [Cucumis sativus]
Csa5G182030	1.78839	2.57435	2.42598	0.831406	1.07835	1.77497	1.30363	0.377534	1.57291	-0.866482	down	-1.11991	down	-0.246401	normal	--	--	--	--	--	--	--	Dof domain, zinc finger	Dof zinc finger protein DOF2.4 OS=Arabidopsis thaliana OX=3702 GN=DOF2.4 PE=2 SV=1	PREDICTED: dof zinc finger protein DOF2.4 [Cucumis sativus]
Csa5G187870	22.958	21.3388	15.2948	9.25679	10.0591	9.69906	5.86719	9.67092	8.09099	-0.987632	down	-1.50131	down	-0.506735	normal	[M]	Cell wall/membrane/envelope biogenesis	Molecular Function: serine-type endopeptidase activity (GO:0004252);; Biological Process: proteolysis (GO:0006508);; Biological Process: metabolic process (GO:0008152);; Molecular Function: serine-type peptidase activity (GO:0008236);; Molecular Function: identical protein binding (GO:0042802);; Biological Process: negative regulation of catalytic activity (GO:0043086);;	--	--	--	--	Subtilase family;; Peptidase inhibitor I9	Cucumisin OS=Cucumis melo OX=3656 PE=1 SV=1	PREDICTED: cucumisin-like [Cucumis sativus]
Csa5G189900	2.66413	3.98071	5.26007	1.20477	1.59992	1.94202	1.16598	1.86947	1.77169	-1.29999	down	-1.34747	down	-0.0383553	normal	[O]	Posttranslational modification, protein turnover, chaperones	Biological Process: metabolic process (GO:0008152);; Biological Process: cellular process (GO:0009987);; Molecular Function: oxidoreductase activity, acting on a sulfur group of donors (GO:0016667);; Biological Process: single-organism metabolic process (GO:0044710);; Biological Process: regulation of biological process (GO:0050789);;	K03671|4.51846e-78|csv:101215391|K03671 thioredoxin 1 | (RefSeq) thioredoxin H-type	--	[O]	Posttranslational modification, protein turnover, chaperones	Thioredoxin;; Thioredoxin-like;; AhpC/TSA family	Thioredoxin H-type OS=Ricinus communis OX=3988 PE=3 SV=1	PREDICTED: thioredoxin H-type [Cucumis sativus]
Csa5G219390	0.912067	1.02251	0.852657	0.136265	0.055642	0.249924	0.350003	0.338231	0.241657	-2.62518	down	-1.62226	down	--	--	[E]	Amino acid transport and metabolism	Molecular Function: transporter activity (GO:0005215);; Cellular Component: plasma membrane (GO:0005886);; Biological Process: oligopeptide transport (GO:0006857);; Biological Process: response to nematode (GO:0009624);; Cellular Component: membrane (GO:0016020);;	--	--	[E]	Amino acid transport and metabolism	POT family	Protein NRT1/ PTR FAMILY 5.1 OS=Arabidopsis thaliana OX=3702 GN=NPF5.1 PE=2 SV=2	PREDICTED: protein NRT1/ PTR FAMILY 5.1 [Cucumis sativus]
Csa5G229130	5.6979	24.0996	6.26179	6.08872	5.66167	5.52238	5.35802	0.693266	5.89652	-1.02267	down	-1.62687	down	-0.597264	normal	--	--	--	--	--	--	--	--	--	hypothetical protein Csa_5G229130 [Cucumis sativus]
Csa5G240140	0.960283	3.56575	1.65927	0.056821	0.507912	0.196342	0.281226	0.172513	0.309065	-2.97544	down	-3.04131	down	--	--	[G]	Carbohydrate transport and metabolism	Cellular Component: extracellular region (GO:0005576);; Cellular Component: cell wall (GO:0005618);; Biological Process: glucuronoxylan metabolic process (GO:0010413);; Molecular Function: endo-1,4-beta-xylanase activity (GO:0031176);; Molecular Function: cation binding (GO:0043169);; Biological Process: xylan biosynthetic process (GO:0045492);; Biological Process: xylan catabolic process (GO:004…	--	--	--	--	Carbohydrate binding domain;; Glycosyl hydrolase family 10	Putative Pol polyprotein from transposon element Bs1 OS=Zea mays OX=4577 PE=4 SV=1	PREDICTED: uncharacterized protein LOC101206229 [Cucumis sativus]
Csa5G318390	0.65306	1.84938	0.749188	0.386757	0.449301	0.769557	0.412339	0.108514	0.299517	-0.996596	down	-2.01544	down	--	--	[IQ]	Lipid transport and metabolism;; Secondary metabolites biosynthesis, transport and catabolism	Molecular Function: acetate-CoA ligase activity (GO:0003987);; Cellular Component: peroxisome (GO:0005777);; Biological Process: metabolic process (GO:0008152);; Molecular Function: o-succinylbenzoate-CoA ligase activity (GO:0008756);;	--	--	[I]	Lipid transport and metabolism	AMP-binding enzyme;; AMP-binding enzyme C-terminal domain	Probable acyl-activating enzyme 5, peroxisomal OS=Arabidopsis thaliana OX=3702 GN=AAE5 PE=1 SV=1	PREDICTED: probable acyl-activating enzyme 5, peroxisomal [Cucumis sativus]
Csa5G322500	2.49978	4.46267	3.40793	1.81032	1.22023	2.19901	0.524203	0.338252	0.331799	-0.981062	down	-3.11349	down	-2.12535	down	[M]	Cell wall/membrane/envelope biogenesis	Biological Process: response to hypoxia (GO:0001666);; Cellular Component: cell wall (GO:0005618);; Biological Process: sucrose metabolic process (GO:0005985);; Biological Process: sucrose biosynthetic process (GO:0005986);; Biological Process: biosynthetic process (GO:0009058);; Molecular Function: sucrose synthase activity (GO:0016157);; Biological Process: galactolipid biosynthetic process (GO…	K00695|0|csv:101211461|K00695 sucrose synthase [EC:2.4.1.13] | (RefSeq) Sus4; sucrose synthase 5-like	Starch and sucrose metabolism (ko00500)	[M]	Cell wall/membrane/envelope biogenesis	Sucrose synthase;; Glycosyl transferases group 1;; Glycosyl transferases group 1	Sucrose synthase 5 OS=Oryza sativa subsp. japonica OX=39947 GN=SUS5 PE=2 SV=1	hypothetical protein Csa_5G322500 [Cucumis sativus]
Csa5G374730	1.30006	2.47932	2.15761	0.811368	0.622635	1.36456	1.05858	0.818383	1.01881	-1.05689	down	-1.07812	down	-0.0132099	normal	--	--	Biological Process: polysaccharide biosynthetic process (GO:0000271);; Biological Process: amino acid transmembrane transport (GO:0003333);; Cellular Component: plasma membrane (GO:0005886);; Biological Process: acetyl-CoA metabolic process (GO:0006084);; Biological Process: response to auxin (GO:0009733);; Biological Process: auxin-activated signaling pathway (GO:0009734);; Biological Process: m…	K13946|0|csv:101215516|K13946 auxin influx carrier (AUX1 LAX family) | (RefSeq) auxin transporter-like protein 3	Plant hormone signal transduction (ko04075)	[E]	Amino acid transport and metabolism	Transmembrane amino acid transporter protein	Auxin transporter-like protein 3 OS=Medicago truncatula OX=3880 GN=LAX3 PE=2 SV=1	PREDICTED: auxin transporter-like protein 3 [Cucumis sativus]
Csa5G375760	1.71548	3.85513	2.94161	0.630652	1.57351	1.20954	0.942567	1.26048	1.02124	-1.29233	down	-1.44229	down	-0.140302	normal	--	--	Molecular Function: NAD+ ADP-ribosyltransferase activity (GO:0003950);; Molecular Function: metal ion binding (GO:0046872);;	--	--	--	--	--	--	PREDICTED: uncharacterized protein LOC101220433 [Cucumis sativus]
Csa5G410730	2.08752	4.84382	2.64248	1.42193	1.03166	1.91514	0.581102	0.529708	1.3624	-1.10869	down	-1.94355	down	-0.826963	normal	[E]	Amino acid transport and metabolism	Molecular Function: glutamate-ammonia ligase activity (GO:0004356);; Molecular Function: copper ion binding (GO:0005507);; Molecular Function: ATP binding (GO:0005524);; Cellular Component: cytoplasm (GO:0005737);; Cellular Component: vacuole (GO:0005773);; Biological Process: glycolytic process (GO:0006096);; Biological Process: glutamine biosynthetic process (GO:0006542);; Biological Process: p…	K01915|0|csv:101215515|K01915 glutamine synthetase [EC:6.3.1.2] | (RefSeq) glutamine synthetase nodule isozyme	Arginine biosynthesis (ko00220);; Alanine, aspartate and glutamate metabolism (ko00250);; Glyoxylate and dicarboxylate metabolism (ko00630);; Nitrogen metabolism (ko00910);; Biosynthesis of amino acids (ko01230)	[E]	Amino acid transport and metabolism	Glutamine synthetase, catalytic domain;; Glutamine synthetase, beta-Grasp domain	Glutamine synthetase nodule isozyme OS=Vigna aconitifolia OX=3918 PE=2 SV=1	PREDICTED: glutamine synthetase nodule isozyme [Cucumis sativus]
Csa5G469050	0.640777	1.32301	0.73763	0.354352	0.327708	0.365343	0.368005	0.246884	0.311832	-1.3242	down	-1.57349	down	-0.241815	normal	[T]	Signal transduction mechanisms	--	--	--	[R]	General function prediction only	Domain of unknown function;; Ankyrin repeats (3 copies);; Ankyrin repeats (many copies);; Ankyrin repeat;; Ankyrin repeat;; Ankyrin repeats (many copies)	--	PREDICTED: uncharacterized protein LOC101205819 [Cucumis sativus]
Csa5G529950	0.59057	1.09949	0.782049	0.316673	0.275138	0.251538	0.228144	0.202484	0.185944	-1.5094	down	-2.01917	down	--	--	[T]	Signal transduction mechanisms	Molecular Function: peroxidase activity (GO:0004601);; Molecular Function: iron ion binding (GO:0005506);; Molecular Function: calcium ion binding (GO:0005509);; Cellular Component: nucleus (GO:0005634);; Biological Process: defense response (GO:0006952);; Molecular Function: electron carrier activity (GO:0009055);; Cellular Component: integral component of membrane (GO:0016021);; Molecular Funct…	K13447|0|csv:101218616|K13447 respiratory burst oxidase [EC:1.6.3.- 1.11.1.-] | (RefSeq) respiratory burst oxidase homolog protein E	Plant-pathogen interaction (ko04626)	[PQ]	Inorganic ion transport and metabolism;; Secondary metabolites biosynthesis, transport and catabolism	Ferric reductase NAD binding domain;; Respiratory burst NADPH oxidase;; FAD-binding domain;; Ferric reductase like transmembrane component	Respiratory burst oxidase homolog protein E OS=Arabidopsis thaliana OX=3702 GN=RBOHE PE=2 SV=2	PREDICTED: respiratory burst oxidase homolog protein E isoform X1 [Cucumis sativus]
Csa5G590060	0.892632	1.52814	1.78154	0.621973	0.689496	0.818767	0.802884	0.675661	0.813228	-0.981493	down	-0.854003	down	0.136569	normal	--	--	Biological Process: proteolysis (GO:0006508);; Molecular Function: cysteine-type peptidase activity (GO:0008234);; Cellular Component: chloroplast (GO:0009507);;	K18342|2.32903e-103|csv:101209836|K18342 OTU domain-containing protein 6 [EC:3.4.19.12] | (RefSeq) OTU domain-containing protein At3g57810-like	--	[TO]	Signal transduction mechanisms;; Posttranslational modification, protein turnover, chaperones	OTU-like cysteine protease	OTU domain-containing protein At3g57810 OS=Arabidopsis thaliana OX=3702 GN=At3g57810 PE=2 SV=1	hypothetical protein Csa_5G590060 [Cucumis sativus]
Csa5G599300	15.9153	9.7904	8.50174	6.81324	5.3974	6.32493	2.49037	2.86613	2.41858	-0.878323	down	-2.20008	down	-1.31531	down	[I]	Lipid transport and metabolism	Molecular Function: binding (GO:0005488);; Cellular Component: extracellular region (GO:0005576);; Molecular Function: oxidoreductase activity (GO:0016491);;	--	--	--	--	--	--	PREDICTED: uncharacterized protein LOC101219935 [Cucumis sativus]
Csa5G602230	8.42602	18.073	16.6225	6.37287	6.40571	9.98039	10.0735	6.92453	8.32714	-0.888693	down	-0.818653	down	0.0784981	normal	--	--	--	--	--	--	--	bHLH-MYC and R2R3-MYB transcription factors N-terminal	Protein RICE SALT SENSITIVE 3 OS=Oryza sativa subsp. japonica OX=39947 GN=RSS3 PE=1 SV=1	PREDICTED: uncharacterized protein LOC101212200 [Cucumis sativus]
Csa5G608050	3.74923	5.23161	6.0271	2.6221	0.859429	1.05817	1.3484	1.47175	4.27861	-1.7352	down	-1.25588	down	0.492028	normal	[K]	Transcription	Molecular Function: protein serine/threonine kinase activity (GO:0004674);; Molecular Function: ATP binding (GO:0005524);; Cellular Component: plasma membrane (GO:0005886);; Biological Process: protein phosphorylation (GO:0006468);; Cellular Component: integral component of membrane (GO:0016021);; Molecular Function: 2-alkenal reductase [NAD(P)] activity (GO:0032440);; Biological Process: defense…	--	--	--	--	Protein kinase domain;; Protein tyrosine kinase;; Leucine rich repeat N-terminal domain;; Leucine Rich repeats (2 copies);; Leucine rich repeat	Protein NSP-INTERACTING KINASE 1 OS=Arabidopsis thaliana OX=3702 GN=NIK1 PE=1 SV=1	PREDICTED: protein NSP-INTERACTING KINASE 1 isoform X2 [Cucumis sativus]
Csa5G622450	0.887765	0.639132	0.797564	0.488618	0.234494	0.312425	0.085221	0.186796	0.270709	-1.08654	down	-2.08945	down	--	--	[IQ]	Lipid transport and metabolism;; Secondary metabolites biosynthesis, transport and catabolism	Molecular Function: peroxidase activity (GO:0004601);; Biological Process: response to oxidative stress (GO:0006979);; Molecular Function: ligase activity (GO:0016874);; Molecular Function: heme binding (GO:0020037);; Molecular Function: metal ion binding (GO:0046872);; Molecular Function: Photinus-luciferin 4-monooxygenase (ATP-hydrolyzing) activity (GO:0047077);; Biological Process: oxidation-r…	K10526|0|csv:101206690|K10526 OPC-8:0 CoA ligase 1 [EC:6.2.1.-] | (RefSeq) 4-coumarate--CoA ligase-like 5	alpha-Linolenic acid metabolism (ko00592)	[I]	Lipid transport and metabolism	AMP-binding enzyme;; AMP-binding enzyme C-terminal domain	4-coumarate--CoA ligase-like 5 OS=Arabidopsis thaliana OX=3702 GN=4CLL5 PE=1 SV=2	PREDICTED: 4-coumarate--CoA ligase-like 5 [Cucumis sativus]
Csa5G622530	2.51052	2.2452	2.61977	0.458643	1.44791	1.06206	0.884037	0.504908	1.25845	-1.30427	down	-1.53091	down	-0.218115	normal	--	--	Biological Process: ER to Golgi vesicle-mediated transport (GO:0006888);; Cellular Component: plasmodesma (GO:0009506);; Cellular Component: chloroplast (GO:0009507);; Biological Process: systemic acquired resistance (GO:0009627);; Biological Process: response to endoplasmic reticulum stress (GO:0034976);; Biological Process: amino acid import (GO:0043090);; Biological Process: defense response t…	--	--	--	--	Nodulin-like;; Major Facilitator Superfamily	--	PREDICTED: uncharacterized protein LOC101205503 [Cucumis sativus]
Csa5G623360	29.456	90.4397	71.987	8.49132	18.1029	16.6773	6.29875	3.4514	6.25282	-2.11962	down	-3.62562	down	-1.49599	down	[G]	Carbohydrate transport and metabolism	Cellular Component: vacuole (GO:0005773);; Cellular Component: plasma membrane (GO:0005886);; Biological Process: iron ion transport (GO:0006826);; Biological Process: water transport (GO:0006833);; Biological Process: response to osmotic stress (GO:0006970);; Biological Process: response to desiccation (GO:0009269);; Cellular Component: plasmodesma (GO:0009506);; Cellular Component: chloroplast …	K09872|0|csv:101204956|K09872 aquaporin PIP | (RefSeq) PIP2-7; aquaporin PIP2-1-like	--	[G]	Carbohydrate transport and metabolism	Major intrinsic protein	Probable aquaporin PIP2-5 OS=Arabidopsis thaliana OX=3702 GN=PIP2-5 PE=1 SV=1	aquaporin PIP2-1-like [Cucumis sativus]
Csa5G623810	4.56098	7.15722	6.3177	2.60513	2.62824	5.20823	2.44764	2.25584	2.46745	-0.770019	down	-1.3978	down	-0.6203	normal	[E]	Amino acid transport and metabolism	Cellular Component: plasma membrane (GO:0005886);; Biological Process: transport (GO:0006810);; Cellular Component: membrane (GO:0016020);;	K14638|0|csv:101221222|K14638 solute carrier family 15 (peptide/histidine transporter), member 3/4 | (RefSeq) protein NRT1/ PTR FAMILY 5.4	--	[E]	Amino acid transport and metabolism	POT family;; Major Facilitator Superfamily	Protein NRT1/ PTR FAMILY 5.4 OS=Arabidopsis thaliana OX=3702 GN=NPF5.4 PE=2 SV=1	hypothetical protein Csa_5G623810 [Cucumis sativus]
Csa5G623880	1.20062	2.09533	0.951415	0.655144	0.301036	0.312037	0.367285	0.062842	0.468398	-1.66775	down	-2.22868	down	--	--	--	--	--	--	--	[K]	Transcription	Myb/SANT-like DNA-binding domain	Trihelix transcription factor ASIL2 OS=Arabidopsis thaliana OX=3702 GN=ASIL2 PE=1 SV=1	PREDICTED: trihelix transcription factor ASIL2 [Cucumis sativus]
Csa5G633170	1.24195	1.69287	4.80492	0.254929	0.683837	0.77489	0.669382	0.353393	0.489641	-2.14733	down	-2.39422	down	-0.23436	normal	[V]	Defense mechanisms	Molecular Function: ATP binding (GO:0005524);; Cellular Component: plasma membrane (GO:0005886);; Biological Process: obsolete ATP catabolic process (GO:0006200);; Biological Process: vernalization response (GO:0010048);; Biological Process: auxin efflux (GO:0010315);; Molecular Function: auxin efflux transmembrane transporter activity (GO:0010329);; Biological Process: basipetal auxin transport …	K05658|0|csv:101206448|K05658 ATP-binding cassette, subfamily B (MDR/TAP), member 1 [EC:3.6.3.44] | (RefSeq) ABC transporter B family member 15-like	ABC transporters (ko02010)	[Q]	Secondary metabolites biosynthesis, transport and catabolism	ABC transporter transmembrane region;; ABC transporter;; RecF/RecN/SMC N terminal domain;; P-loop containing region of AAA domain;; RsgA GTPase;; Zeta toxin	ABC transporter B family member 15 OS=Arabidopsis thaliana OX=3702 GN=ABCB15 PE=3 SV=1	PREDICTED: ABC transporter B family member 15-like [Cucumis sativus]
Csa5G640520	3.31738	14.5009	10.0661	3.16185	2.61981	5.59381	3.28117	1.5418	2.15641	-1.26186	down	-2.02862	down	-0.758315	normal	--	--	--	--	--	--	--	--	--	hypothetical protein Csa_5G640520 [Cucumis sativus]
Csa5G640530	6.46325	21.3259	16.628	6.17338	3.63682	7.55333	6.03513	3.61262	5.29621	-1.32242	down	-1.61253	down	-0.281688	normal	--	--	--	--	--	--	--	--	--	hypothetical protein Csa_5G640530 [Cucumis sativus]
Csa5G640540	0.867897	2.35051	1.30207	0.617411	0.729181	0.816421	0.413432	0.475946	0.516481	-1.03511	down	-1.71657	down	-0.673433	normal	[M]	Cell wall/membrane/envelope biogenesis	Molecular Function: protein kinase activity (GO:0004672);; Cellular Component: plasma membrane (GO:0005886);; Biological Process: glucose catabolic process (GO:0006007);; Biological Process: response to stress (GO:0006950);; Biological Process: response to osmotic stress (GO:0006970);; Cellular Component: plasmodesma (GO:0009506);; Biological Process: anatomical structure morphogenesis (GO:000965…	--	--	[T]	Signal transduction mechanisms	Protein tyrosine kinase;; Protein kinase domain;; Carbohydrate-binding protein of the ER;; Di-glucose binding within endoplasmic reticulum	Receptor-like protein kinase FERONIA OS=Arabidopsis thaliana OX=3702 GN=FER PE=1 SV=1	PREDICTED: receptor-like protein kinase FERONIA [Cucumis sativus]
Csa5G644010	0.858399	4.68757	1.71946	0.51784	0.906786	0.575533	0.844053	0.117431	0.936008	-1.81165	down	-1.95882	down	-0.139111	normal	--	--	--	--	--	--	--	--	--	PREDICTED: uncharacterized protein LOC101213588 [Cucumis sativus]
Csa5G645150	13.2998	10.7443	10.0234	7.39136	7.47137	7.49395	1.50565	1.07002	1.46485	-0.592108	down	-3.11791	down	-2.51772	down	[HR]	Coenzyme transport and metabolism;; General function prediction only	Biological Process: indoleacetic acid conjugate metabolic process (GO:0033473);; Biological Process: shoot system development (GO:0048367);; Molecular Function: methyl indole-3-acetate esterase activity (GO:0080030);;	--	--	--	--	alpha/beta hydrolase fold;; Alpha/beta hydrolase family;; Serine aminopeptidase, S33	Methylesterase 17 OS=Arabidopsis thaliana OX=3702 GN=MES17 PE=1 SV=1	hypothetical protein Csa_5G645150 [Cucumis sativus]
Csa5G647250	14.7711	10.2456	4.73537	5.47339	2.37092	3.85272	1.05394	0.871923	1.08869	-1.33663	down	-3.34378	down	-2.00232	down	--	--	Cellular Component: Golgi apparatus (GO:0005794);; Biological Process: protein glycosylation (GO:0006486);; Molecular Function: galactosyltransferase activity (GO:0008378);; Cellular Component: plastid (GO:0009536);; Biological Process: pollen exine formation (GO:0010584);; Cellular Component: membrane (GO:0016020);; Cellular Component: integral component of membrane (GO:0016021);;	K20855|0|csv:101218850|K20855 beta-1,3-galactosyltransferase 1/2/3/4/5/7/8 [EC:2.4.1.-] | (RefSeq) probable beta-1,3-galactosyltransferase 8	--	[G]	Carbohydrate transport and metabolism	Galactosyltransferase;; Domain of unknown function (DUF4094);; Fringe-like	Probable beta-1,3-galactosyltransferase 8 OS=Arabidopsis thaliana OX=3702 GN=B3GALT8 PE=2 SV=1	PREDICTED: probable beta-1,3-galactosyltransferase 8 [Cucumis sativus]
Csa5G647400	2.59586	5.72061	3.57359	1.87522	2.2158	2.39156	2.09719	2.86934	2.28396	-0.849585	down	-0.758506	down	0.0987795	normal	[G]	Carbohydrate transport and metabolism	Molecular Function: beta-glucanase activity (GO:0052736);;	K01180|0|csv:101220284|K01180 endo-1,3(4)-beta-glucanase [EC:3.2.1.6] | (RefSeq) putative endo-1,3(4)-beta-glucanase 2	--	[G]	Carbohydrate transport and metabolism	Glycosyl hydrolase family 81	--	PREDICTED: putative endo-1,3(4)-beta-glucanase 2 [Cucumis sativus]
Csa5G647490	1.63017	4.39534	3.70124	1.66148	1.33163	1.74322	1.92438	1.56301	1.93199	-1.00839	down	-0.889064	down	0.128083	normal	[O]	Posttranslational modification, protein turnover, chaperones	Molecular Function: isomerase activity (GO:0016853);; Biological Process: response to chemical (GO:0042221);; Biological Process: cell redox homeostasis (GO:0045454);; Molecular Function: protein-disulfide reductase activity (GO:0047134);; Biological Process: pollen tube development (GO:0048868);; Biological Process: oxidation-reduction process (GO:0055114);;	K17609|0|csv:101221696|K17609 nucleoredoxin [EC:1.8.1.8] | (RefSeq) probable nucleoredoxin 1-2	--	[R]	General function prediction only	Thioredoxin-like;; AhpC/TSA family;; Redoxin;; Thioredoxin-like domain;; Thioredoxin;; SCO1/SenC	Probable nucleoredoxin 1 OS=Arabidopsis thaliana OX=3702 GN=At1g60420 PE=1 SV=1	hypothetical protein Csa_5G647490 [Cucumis sativus]
Csa5G648130	2.23544	1.16754	1.62779	0.644374	0.859129	1.44964	0.409325	0.446863	1.05451	-0.839222	down	-1.34505	down	-0.498762	normal	[K]	Transcription	Molecular Function: ATP binding (GO:0005524);; Biological Process: defense response (GO:0006952);; Biological Process: signal transduction (GO:0007165);; Molecular Function: nucleoside-triphosphatase activity (GO:0017111);; Molecular Function: ADP binding (GO:0043531);;	--	--	--	--	NB-ARC domain;; TIR domain;; Leucine rich repeat;; TIR domain	TMV resistance protein N OS=Nicotiana glutinosa OX=35889 GN=N PE=1 SV=1	hypothetical protein Csa_5G648130 [Cucumis sativus]
Csa6G003390	40.0136	33.0352	23.1034	20.144	19.7131	16.3005	13.5254	17.0897	14.3782	-0.767561	down	-1.15833	down	-0.383965	normal	--	--	Cellular Component: extracellular region (GO:0005576);; Cellular Component: nucleus (GO:0005634);;	K13667|0|csv:101203870|K13667 protein glucosyltransferase [EC:2.4.1.-] | (RefSeq) protein O-glucosyltransferase 1-like	--	[R]	General function prediction only	Glycosyl transferase family 90	--	PREDICTED: protein O-glucosyltransferase 1-like [Cucumis sativus]
Csa6G008570	1.04314	5.06771	2.5769	0.946465	1.21252	1.29274	1.34066	1.04606	1.05602	-1.29172	down	-1.36768	down	-0.0669866	normal	[T]	Signal transduction mechanisms	Molecular Function: catalytic activity (GO:0003824);; Biological Process: metabolic process (GO:0008152);;	--	--	[R]	General function prediction only	Ankyrin repeats (3 copies);; Ankyrin repeats (many copies);; Ankyrin repeats (many copies);; Ankyrin repeat;; Ankyrin repeat	Ankyrin repeat-containing protein At2g01680 OS=Arabidopsis thaliana OX=3702 GN=At2g01680 PE=2 SV=1	hypothetical protein Csa_6G008570 [Cucumis sativus]
Csa6G032480	1.9266	2.29238	1.48242	0	0.549924	0.859567	0.265084	0.072934	0.289756	-2.00098	down	-3.04629	down	--	--	--	--	Cellular Component: nucleus (GO:0005634);; Biological Process: metal ion transport (GO:0030001);; Molecular Function: metal ion binding (GO:0046872);;	--	--	--	--	--	--	PREDICTED: uncharacterized protein LOC101209809 isoform X1 [Cucumis sativus]
Csa6G077420	13.1452	14.8226	11.7972	6.80323	6.44768	6.926	2.32281	2.53273	2.79308	-0.960147	down	-2.42709	down	-1.45904	down	--	--	--	--	--	--	--	Protein of unknown function (DUF1442)	--	PREDICTED: uncharacterized protein LOC101221777 [Cucumis sativus]
Csa6G079740	3.6173	2.54528	2.94258	1.4213	2.2421	1.61083	0.795584	0.459045	0.507661	-0.779448	down	-2.41033	down	-1.62292	down	[Q]	Secondary metabolites biosynthesis, transport and catabolism	Molecular Function: hydrolase activity, hydrolyzing O-glycosyl compounds (GO:0004553);; Cellular Component: extracellular region (GO:0005576);; Biological Process: carbohydrate metabolic process (GO:0005975);;	--	--	--	--	Glycosyl hydrolase family 9	Endoglucanase 12 OS=Arabidopsis thaliana OX=3702 GN=At2g44540 PE=3 SV=1	hypothetical protein Csa_6G079740 [Cucumis sativus]
Csa6G079750	507.195	359.914	354.254	218.033	229.52	237.363	57.2365	76.162	85.3065	-0.828262	down	-2.54669	down	-1.71092	down	[I]	Lipid transport and metabolism	Molecular Function: iron ion binding (GO:0005506);; Biological Process: fatty acid biosynthetic process (GO:0006633);; Biological Process: response to water deprivation (GO:0009414);; Biological Process: wax biosynthetic process (GO:0010025);; Biological Process: cutin biosynthetic process (GO:0010143);; Cellular Component: integral component of membrane (GO:0016021);; Molecular Function: oxidore…	K15404|0|csv:101222843|K15404 aldehyde decarbonylase [EC:4.1.99.5] | (RefSeq) protein ECERIFERUM 1-like	Cutin, suberine and wax biosynthesis (ko00073)	--	--	WAX2 C-terminal domain;; Fatty acid hydroxylase superfamily	Protein ECERIFERUM 1 OS=Arabidopsis thaliana OX=3702 GN=CER1 PE=1 SV=1	PREDICTED: protein ECERIFERUM 1-like [Cucumis sativus]
Csa6G081510	1.1718	3.89975	2.67339	1.27391	1.11669	1.54769	0.299658	0.493038	0.731684	-0.941474	down	-2.35964	down	-1.41054	down	--	--	Biological Process: regulation of transcription, DNA-templated (GO:0006355);; Biological Process: single-organism process (GO:0044699);;	--	--	--	--	GRAS domain family	Protein SHORT-ROOT OS=Arabidopsis thaliana OX=3702 GN=SHR PE=1 SV=1	PREDICTED: protein SHORT-ROOT-like [Cucumis sativus]
Csa6G083030	0.906104	2.09764	2.0942	0.700762	0.656898	1.04077	0.650644	0.720327	0.864951	-1.04828	down	-1.24138	down	--	--	--	--	--	--	--	--	--	Clostridium epsilon toxin ETX/Bacillus mosquitocidal toxin MTX2;; Aerolysin toxin	--	hypothetical protein Csa_6G083030 [Cucumis sativus]
Csa6G088170	6.25943	19.3349	14.2765	6.35907	6.7517	4.23798	9.60813	9.22378	5.48968	-1.1666	down	-0.751298	down	0.424388	normal	[QV]	Secondary metabolites biosynthesis, transport and catabolism;; Defense mechanisms	Molecular Function: monooxygenase activity (GO:0004497);; Molecular Function: iron ion binding (GO:0005506);; Molecular Function: electron carrier activity (GO:0009055);; Molecular Function: oxidoreductase activity, acting on paired donors, with incorporation or reduction of molecular oxygen (GO:0016705);; Molecular Function: heme binding (GO:0020037);; Molecular Function: metal ion binding (GO:0…	--	--	[Q]	Secondary metabolites biosynthesis, transport and catabolism	Cytochrome P450	Cytochrome P450 89A9 OS=Arabidopsis thaliana OX=3702 GN=CYP89A9 PE=2 SV=1	cytochrome P450 89A2-like [Cucumis sativus]
Csa6G138620	1.31877	4.47196	3.53526	0.870145	0.722278	1.85206	0.220285	0.104192	0.067923	-1.39554	down	-4.37922	down	--	--	--	--	Biological Process: sugar mediated signaling pathway (GO:0010182);; Biological Process: positive regulation of transcription, DNA-templated (GO:0045893);;	--	--	--	--	CCT motif	Zinc finger protein CONSTANS-LIKE 3 OS=Arabidopsis thaliana OX=3702 GN=COL3 PE=1 SV=1	PREDICTED: uncharacterized protein LOC101221095 [Cucumis sativus]
Csa6G139790	419.798	14.6866	14.1958	13.4227	12.5913	11.2811	17.1602	13.8137	13.6186	-3.69625	down	-3.5061	down	0.191999	normal	[H]	Coenzyme transport and metabolism	Molecular Function: glutaminase activity (GO:0004359);; Cellular Component: cytosol (GO:0005829);; Biological Process: glutamine metabolic process (GO:0006541);; Biological Process: pyridoxine biosynthetic process (GO:0008615);; Biological Process: embryo development ending in seed dormancy (GO:0009793);; Molecular Function: transferase activity (GO:0016740);; Molecular Function: protein heterodi…	K08681|4.97995e-138|csv:101214331|K08681 5'-phosphate synthase pdxT subunit [EC:4.3.3.6] | (RefSeq) probable pyridoxal 5'-phosphate synthase subunit PDX2	Vitamin B6 metabolism (ko00750)	[H]	Coenzyme transport and metabolism	SNO glutamine amidotransferase family;; CobB/CobQ-like glutamine amidotransferase domain	Probable pyridoxal 5&apos;-phosphate synthase subunit PDX2 OS=Arabidopsis thaliana OX=3702 GN=PDX2 PE=1 SV=1	PREDICTED: probable pyridoxal 5&apos;-phosphate synthase subunit PDX2 [Cucumis sativus]
Csa6G141420	8.65924	12.1408	12.682	5.15646	6.12787	8.44625	5.29864	6.10929	5.00164	-0.745243	down	-1.07737	down	-0.324198	normal	[R]	General function prediction only	Cellular Component: nucleus (GO:0005634);; Cellular Component: cytosol (GO:0005829);; Molecular Function: hydrolase activity (GO:0016787);; Molecular Function: lyase activity (GO:0016829);;	K06966|6.30201e-147|csv:101217215|K06966 uncharacterized protein | (RefSeq) cytokinin riboside 5'-monophosphate phosphoribohydrolase LOG1	--	--	--	Possible lysine decarboxylase	Cytokinin riboside 5&apos;-monophosphate phosphoribohydrolase LOG1 OS=Arabidopsis thaliana OX=3702 GN=LOG1 PE=1 SV=1	PREDICTED: cytokinin riboside 5&apos;-monophosphate phosphoribohydrolase LOG1 [Cucumis sativus]
Csa6G149410	1.36581	2.0637	1.29791	0.6385	0.531643	0.96237	0.517591	0.390913	0.538198	-1.12128	down	-1.75971	down	-0.631474	normal	--	--	Biological Process: proteolysis (GO:0006508);; Molecular Function: serine-type peptidase activity (GO:0008236);;	K01285|0|csv:101222253|K01285 lysosomal Pro-X carboxypeptidase [EC:3.4.16.2] | (RefSeq) lysosomal Pro-X carboxypeptidase	--	[OR]	Posttranslational modification, protein turnover, chaperones;; General function prediction only	Serine carboxypeptidase S28	Probable serine protease EDA2 OS=Arabidopsis thaliana OX=3702 GN=EDA2 PE=2 SV=2	PREDICTED: lysosomal Pro-X carboxypeptidase [Cucumis sativus]
Csa6G151640	10.5918	5.75358	3.62792	2.74261	1.55095	2.43011	0.339919	0.221444	1.06649	-1.56887	down	-3.69096	down	-2.11429	down	[T]	Signal transduction mechanisms	Molecular Function: ATP binding (GO:0005524);; Biological Process: obsolete ATP catabolic process (GO:0006200);; Biological Process: transport (GO:0006810);; Molecular Function: ATPase-coupled organic phosphonate transmembrane transporter activity (GO:0015416);; Cellular Component: membrane (GO:0016020);; Cellular Component: integral component of membrane (GO:0016021);;	--	--	[Q]	Secondary metabolites biosynthesis, transport and catabolism	ABC-2 type transporter;; ABC transporter;; Plant PDR ABC transporter associated;; ABC-transporter extracellular N-terminal;; AAA domain, putative AbiEii toxin, Type IV TA system;; AAA ATPase domain;; P-loop containing region of AAA domain;; ATPase family associated with various cellular activities (AAA)	Pleiotropic drug resistance protein 2 OS=Nicotiana plumbaginifolia OX=4092 GN=PDR2 PE=2 SV=1	PREDICTED: pleiotropic drug resistance protein 2-like [Cucumis sativus]
Csa6G191580	16.1257	15.4813	77.6071	17.3048	16.4039	17.8721	18.7349	19.6507	21.171	-1.05499	down	-0.925299	down	0.142716	normal	--	--	Cellular Component: nucleosome (GO:0000786);; Molecular Function: DNA binding (GO:0003677);; Cellular Component: nucleolus (GO:0005730);; Cellular Component: mitochondrion (GO:0005739);; Cellular Component: vacuolar membrane (GO:0005774);; Cellular Component: Golgi apparatus (GO:0005794);; Cellular Component: cytosol (GO:0005829);; Cellular Component: plasma membrane (GO:0005886);; Biological Pro…	K11254|1.24465e-50|zma:103634846|K11254 histone H4 | (RefSeq) histone H4	--	[B]	Chromatin structure and dynamics	Centromere kinetochore component CENP-T histone fold;; TATA box binding protein associated factor (TAF)	Histone H4 OS=Glycine max OX=3847 PE=3 SV=1	histone H4 [Zea mays]
Csa6G296960	66.1096	48.5827	51.2	34.41	31.1043	37.9388	15.9672	16.9791	15.0123	-0.667466	down	-1.84926	down	-1.17479	down	--	--	Biological Process: transcription, DNA-templated (GO:0006351);;	K09284|0|csv:101222024|K09284 AP2-like factor, euAP2 lineage | (RefSeq) ethylene-responsive transcription factor RAP2-7	--	--	--	AP2 domain	Ethylene-responsive transcription factor RAP2-7 OS=Arabidopsis thaliana OX=3702 GN=RAP2-7 PE=2 SV=2	PREDICTED: ethylene-responsive transcription factor RAP2-7 isoform X1 [Cucumis sativus]
Csa6G338160	1.45777	4.91307	2.64373	0.153876	0.806459	0.596264	0.256007	0.281719	0.174248	-2.42632	down	-3.5076	down	--	--	[E]	Amino acid transport and metabolism	Molecular Function: serine-type carboxypeptidase activity (GO:0004185);; Cellular Component: extracellular region (GO:0005576);; Cellular Component: cell wall (GO:0005618);; Biological Process: proteolysis (GO:0006508);;	K16297|0|csv:101207193|K16297 serine carboxypeptidase-like clade II [EC:3.4.16.-] | (RefSeq) serine carboxypeptidase-like 42	--	[OE]	Posttranslational modification, protein turnover, chaperones;; Amino acid transport and metabolism	Serine carboxypeptidase	Serine carboxypeptidase-like 42 OS=Arabidopsis thaliana OX=3702 GN=SCPL42 PE=2 SV=1	hypothetical protein Csa_6G338160 [Cucumis sativus]
Csa6G362930	1.86816	4.58984	3.05351	1.49703	1.65612	2.2556	1.04995	1.06346	2.05897	-0.791623	down	-1.23428	down	-0.4344	normal	[E]	Amino acid transport and metabolism	Biological Process: polysaccharide biosynthetic process (GO:0000271);; Molecular Function: spermidine synthase activity (GO:0004766);; Cellular Component: nucleus (GO:0005634);; Cellular Component: cytoplasm (GO:0005737);; Biological Process: pattern specification process (GO:0007389);; Biological Process: regulation of cell size (GO:0008361);; Biological Process: multidimensional cell growth (GO…	K18787|0|csv:101210030|K18787 thermospermine synthase [EC:2.5.1.79] | (RefSeq) thermospermine synthase ACAULIS5	--	[E]	Amino acid transport and metabolism	Spermine/spermidine synthase domain;; Spermidine synthase tetramerisation domain	Thermospermine synthase ACAULIS5 OS=Arabidopsis thaliana OX=3702 GN=ACL5 PE=1 SV=1	PREDICTED: thermospermine synthase ACAULIS5 [Cucumis sativus]
Csa6G363550	1.15032	4.44718	1.83451	0.527982	0.73963	0.604759	0.440134	0.717243	0.544605	-1.92834	down	-2.15319	down	--	--	[T]	Signal transduction mechanisms	--	--	--	[R]	General function prediction only	Ankyrin repeats (3 copies);; Ankyrin repeat;; Domain of unknown function;; Ankyrin repeats (many copies);; Ankyrin repeats (many copies);; Ankyrin repeat	Ankyrin repeat-containing protein At5g02620 OS=Arabidopsis thaliana OX=3702 GN=At5g02620 PE=1 SV=1	PREDICTED: ankyrin repeat-containing protein At3g12360-like [Cucumis sativus]
Csa6G382900	26.2099	14.7491	16.2889	9.15739	7.73656	10.333	3.8167	4.36051	4.02048	-1.06889	down	-2.29426	down	-1.21905	down	[G]	Carbohydrate transport and metabolism	Molecular Function: beta-galactosidase activity (GO:0004565);; Cellular Component: extracellular region (GO:0005576);; Biological Process: metabolic process (GO:0008152);; Molecular Function: hydrolase activity, acting on glycosyl bonds (GO:0016798);;	--	--	[G]	Carbohydrate transport and metabolism	Glycosyl hydrolases family 35;; Galactose binding lectin domain;; Beta-galactosidase jelly roll domain;; Beta-galactosidase	Beta-galactosidase 16 OS=Arabidopsis thaliana OX=3702 GN=BGAL16 PE=2 SV=2	hypothetical protein Csa_6G382900 [Cucumis sativus]
Csa6G401440	16.5817	15.4387	15.3045	9.71031	9.39011	10.8232	11.46	9.69569	11.1509	-0.622639	down	-0.616801	down	0.0135452	normal	--	--	Biological Process: flower development (GO:0009908);;	--	--	--	--	Domain of unknown function (DUF296)	AT-hook motif nuclear-localized protein 10 OS=Arabidopsis thaliana OX=3702 GN=AHL10 PE=1 SV=2	PREDICTED: AT-hook motif nuclear-localized protein 10 [Cucumis sativus]
Csa6G410000	4.54447	3.8948	6.23714	1.25654	2.01183	2.52153	2.27794	2.30744	2.10574	-1.28021	down	-1.30204	down	-0.0136564	normal	--	--	--	--	--	--	--	--	Basic helix-loop-helix protein A OS=Pisum sativum OX=3888 GN=BHLH PE=3 SV=1	PREDICTED: basic helix-loop-helix protein A isoform X1 [Cucumis sativus]
Csa6G423340	1.36451	3.65647	2.09945	0.494191	1.20844	0.816031	0.37829	0.314594	0.420905	-1.45657	down	-2.64287	down	--	--	--	--	Cellular Component: membrane (GO:0016020);;	K17279|9.86136e-105|csv:101213584|K17279 receptor expression-enhancing protein 5/6 | (RefSeq) HVA22-like protein f	--	[U]	Intracellular trafficking, secretion, and vesicular transport	TB2/DP1, HVA22 family	HVA22-like protein f OS=Arabidopsis thaliana OX=3702 GN=HVA22F PE=2 SV=1	PREDICTED: HVA22-like protein f [Cucumis sativus]
Csa6G423470	125.561	82.9498	67.0503	63.918	44.2612	59.589	16.1032	23.7045	23.8745	-0.712198	down	-2.18041	down	-1.46204	down	[Q]	Secondary metabolites biosynthesis, transport and catabolism	Biological Process: metabolic process (GO:0008152);; Molecular Function: oxidoreductase activity (GO:0016491);; Molecular Function: metal ion binding (GO:0046872);;	K00276|0|csv:101221992|K00276 primary-amine oxidase [EC:1.4.3.21] | (RefSeq) primary amine oxidase-like	Glycine, serine and threonine metabolism (ko00260);; Tyrosine metabolism (ko00350);; Phenylalanine metabolism (ko00360);; beta-Alanine metabolism (ko00410);; Isoquinoline alkaloid biosynthesis (ko00950);; Tropane, piperidine and pyridine alkaloid biosynthesis (ko00960)	[Q]	Secondary metabolites biosynthesis, transport and catabolism	Copper amine oxidase, enzyme domain;; Copper amine oxidase, N3 domain;; Copper amine oxidase, N2 domain	Primary amine oxidase (Fragment) OS=Lens culinaris OX=3864 PE=1 SV=3	PREDICTED: primary amine oxidase-like [Cucumis sativus]
Csa6G425780	103.264	95.4833	94.3259	60.435	61.6148	64.8758	35.0567	30.0954	26.0361	-0.642618	down	-1.75578	down	-1.1057	down	--	--	Biological Process: response to karrikin (GO:0080167);;	--	--	--	--	--	--	hypothetical protein Csa_6G425780 [Cucumis sativus]
Csa6G445190	0.59415	1.60514	1.00827	0.051097	0.438147	0.245706	0.327172	0.106581	0.357464	-2.0995	down	-2.05065	down	--	--	[DPM]	Cell cycle control, cell division, chromosome partitioning;; Inorganic ion transport and metabolism;; Cell wall/membrane/envelope biogenesis	Molecular Function: copper ion binding (GO:0005507);; Molecular Function: L-ascorbate oxidase activity (GO:0008447);; Biological Process: glucuronoxylan metabolic process (GO:0010413);; Biological Process: xylan biosynthetic process (GO:0045492);; Biological Process: lignin catabolic process (GO:0046274);; Cellular Component: apoplast (GO:0048046);; Molecular Function: hydroquinone:oxygen oxidore…	K05909|0|csv:101216806|K05909 laccase [EC:1.10.3.2] | (RefSeq) laccase-11	--	[Q]	Secondary metabolites biosynthesis, transport and catabolism	Multicopper oxidase;; Multicopper oxidase;; Multicopper oxidase	Laccase-11 OS=Arabidopsis thaliana OX=3702 GN=LAC11 PE=2 SV=1	PREDICTED: laccase-11 [Cucumis sativus]
Csa6G452010	4.85338	3.05161	1.57092	0.385218	0.242461	0.139875	0.528389	1.35769	0.422901	-3.49675	down	-2.05781	down	--	--	[IR]	Lipid transport and metabolism;; General function prediction only	Molecular Function: carboxylic ester hydrolase activity (GO:0004091);; Cellular Component: extracellular region (GO:0005576);; Biological Process: metabolic process (GO:0008152);; Molecular Function: peptidase activity (GO:0008233);; Molecular Function: hydrolase activity, acting on ester bonds (GO:0016788);;	--	--	--	--	GDSL-like Lipase/Acylhydrolase	GDSL esterase/lipase At5g03610 OS=Arabidopsis thaliana OX=3702 GN=At5g03610 PE=2 SV=1	PREDICTED: GDSL esterase/lipase At5g03610-like [Cucumis sativus]
Csa6G487010	3.71894	2.48191	2.85325	1.49687	1.27818	1.59331	0.176664	0.311938	0.126956	-0.985909	down	-3.78909	down	-2.79553	down	[QV]	Secondary metabolites biosynthesis, transport and catabolism;; Defense mechanisms	Molecular Function: monooxygenase activity (GO:0004497);; Molecular Function: oxidoreductase activity (GO:0016491);; Molecular Function: oxidoreductase activity, acting on paired donors, with incorporation or reduction of molecular oxygen (GO:0016705);; Molecular Function: metal ion binding (GO:0046872);;	--	--	[QI]	Secondary metabolites biosynthesis, transport and catabolism;; Lipid transport and metabolism	Cytochrome P450	Alkane hydroxylase MAH1 OS=Arabidopsis thaliana OX=3702 GN=CYP96A15 PE=2 SV=1	hypothetical protein Csa_6G487010 [Cucumis sativus]
Csa6G487020	15.6445	11.2252	12.2491	6.40414	6.88804	6.8983	1.35879	1.35286	0.803757	-0.945348	down	-3.52104	down	-2.56862	down	[QV]	Secondary metabolites biosynthesis, transport and catabolism;; Defense mechanisms	Molecular Function: monooxygenase activity (GO:0004497);; Molecular Function: oxidoreductase activity (GO:0016491);; Molecular Function: oxidoreductase activity, acting on paired donors, with incorporation or reduction of molecular oxygen (GO:0016705);; Molecular Function: metal ion binding (GO:0046872);;	--	--	[QI]	Secondary metabolites biosynthesis, transport and catabolism;; Lipid transport and metabolism	Cytochrome P450	Alkane hydroxylase MAH1 OS=Arabidopsis thaliana OX=3702 GN=CYP96A15 PE=2 SV=1	hypothetical protein Csa_6G487020 [Cucumis sativus]
Csa6G487580	12.9629	21.0366	17.1994	5.36969	8.94212	7.58074	8.52052	8.98539	11.7267	-1.21243	down	-0.842925	down	0.378561	normal	--	--	Cellular Component: nucleus (GO:0005634);; Cellular Component: plasma membrane (GO:0005886);; Biological Process: phosphatidylinositol biosynthetic process (GO:0006661);;	--	--	--	--	Cleavage site for pathogenic type III effector avirulence factor Avr	--	PREDICTED: uncharacterized protein LOC101206523 [Cucumis sativus]
Csa6G493310	2.57687	7.45327	3.75603	2.02548	2.39355	1.92109	1.92529	2.72128	2.18577	-1.09518	down	-1.06126	down	0.0420082	normal	[H]	Coenzyme transport and metabolism	Biological Process: response to light stimulus (GO:0009416);; Cellular Component: plastid (GO:0009536);; Biological Process: response to auxin (GO:0009733);; Molecular Function: indole-3-acetic acid amido synthetase activity (GO:0010279);; Cellular Component: cytoplasmic vesicle (GO:0016023);; Biological Process: secretion by cell (GO:0032940);;	K14487|0|csv:101211093|K14487 auxin responsive GH3 gene family | (RefSeq) probable indole-3-acetic acid-amido synthetase GH3.1	Plant hormone signal transduction (ko04075)	--	--	GH3 auxin-responsive promoter	Probable indole-3-acetic acid-amido synthetase GH3.1 OS=Arabidopsis thaliana OX=3702 GN=GH3.1 PE=2 SV=1	PREDICTED: probable indole-3-acetic acid-amido synthetase GH3.1 [Cucumis sativus]
Csa6G493320	1.61842	1.99214	1.64683	0.891217	0.966461	1.251	1.22284	0.570768	1.03589	-0.694165	down	-0.899796	down	-0.198295	normal	--	--	--	--	--	--	--	--	--	hypothetical protein Csa_6G493320 [Cucumis sativus]
Csa6G495620	1.71696	5.9772	3.28312	0.894434	1.42753	1.21342	1.39789	1.48216	1.67701	-1.60182	down	-1.3096	down	0.301749	normal	--	--	Molecular Function: transcription factor activity, sequence-specific DNA binding (GO:0003700);; Cellular Component: nucleus (GO:0005634);; Biological Process: regulation of transcription, DNA-templated (GO:0006355);; Biological Process: asymmetric cell division (GO:0008356);; Biological Process: radial pattern formation (GO:0009956);; Biological Process: regulation of hormone metabolic process (G…	--	--	--	--	GRAS domain family	Protein SHORT-ROOT OS=Arabidopsis thaliana OX=3702 GN=SHR PE=1 SV=1	PREDICTED: protein SHORT-ROOT-like [Cucumis sativus]
Csa6G496380	58.9596	71.7857	67.4414	34.0407	40.0083	39.674	23.0636	21.683	21.4852	-0.784492	down	-1.63553	down	-0.842803	down	--	--	Biological Process: post-embryonic development (GO:0009791);; Biological Process: system development (GO:0048731);; Biological Process: regulation of biological process (GO:0050789);;	--	--	--	--	WRC;; QLQ	Growth-regulating factor 1 OS=Arabidopsis thaliana OX=3702 GN=GRF1 PE=1 SV=1	PREDICTED: growth-regulating factor 1 [Cucumis sativus]
Csa6G496410	12.1316	13.4837	11.7889	8.59704	8.4533	7.16005	6.31698	8.99985	7.1653	-0.608402	down	-0.788754	down	-0.172193	normal	[K]	Transcription	Cellular Component: plasma membrane (GO:0005886);; Biological Process: signal transduction (GO:0007165);; Molecular Function: kinase activity (GO:0016301);; Biological Process: phosphorylation (GO:0016310);;	--	--	[R]	General function prediction only	Leucine rich repeat;; Leucine Rich repeats (2 copies);; Leucine Rich Repeat	Inactive LRR receptor-like serine/threonine-protein kinase BIR2 OS=Arabidopsis thaliana OX=3702 GN=BIR2 PE=1 SV=1	PREDICTED: probable inactive receptor kinase At1g27190 [Cucumis sativus]
Csa6G500540	1.89328	2.32723	2.48559	1.07629	1.09065	0.970301	0.988479	1.06677	0.478277	-1.06711	down	-1.44216	down	-0.367326	normal	[G]	Carbohydrate transport and metabolism	Molecular Function: trehalose-phosphatase activity (GO:0004805);; Cellular Component: nucleus (GO:0005634);; Cellular Component: cytoplasm (GO:0005737);; Biological Process: trehalose biosynthetic process (GO:0005992);; Biological Process: response to cadmium ion (GO:0046686);;	K01087|0|csv:101211097|K01087 trehalose 6-phosphate phosphatase [EC:3.1.3.12] | (RefSeq) probable trehalose-phosphate phosphatase J	Starch and sucrose metabolism (ko00500)	[G]	Carbohydrate transport and metabolism	Trehalose-phosphatase	Probable trehalose-phosphate phosphatase J OS=Arabidopsis thaliana OX=3702 GN=TPPJ PE=1 SV=1	PREDICTED: probable trehalose-phosphate phosphatase J [Cucumis sativus]
Csa6G501350	2.73002	2.73879	1.59085	1.39609	1.41983	0.733904	0.472101	0.417388	0.874167	-1.06326	down	-2.23997	down	-1.16736	down	[QV]	Secondary metabolites biosynthesis, transport and catabolism;; Defense mechanisms	Molecular Function: monooxygenase activity (GO:0004497);; Molecular Function: oxidoreductase activity, acting on paired donors, with incorporation or reduction of molecular oxygen (GO:0016705);; Molecular Function: metal ion binding (GO:0046872);;	K20562|0|csv:101204260|K20562 biphenyl-4-hydroxylase | (RefSeq) cytochrome P450 CYP736A12-like	--	[Q]	Secondary metabolites biosynthesis, transport and catabolism	Cytochrome P450	Cytochrome P450 CYP736A12 OS=Panax ginseng OX=4054 PE=2 SV=1	PREDICTED: cytochrome P450 CYP736A12-like [Cucumis sativus]
Csa6G504510	0.944348	2.33832	1.00912	0.502126	0.12126	0.591444	0.086273	0.039277	0.061424	-1.75207	down	-4.36028	down	--	--	--	--	--	--	--	--	--	--	Transcription factor bHLH110 OS=Arabidopsis thaliana OX=3702 GN=BHLH110 PE=2 SV=2	PREDICTED: transcription factor bHLH110-like isoform X1 [Cucumis sativus]
Csa6G507040	9.18012	8.28617	6.45451	2.64513	1.82906	3.21938	2.01706	1.57428	2.14468	-1.6198	down	-2.1142	down	-0.48757	normal	[P]	Inorganic ion transport and metabolism	Molecular Function: thiosulfate sulfurtransferase activity (GO:0004792);; Biological Process: response to stress (GO:0006950);; Biological Process: aging (GO:0007568);; Cellular Component: chloroplast (GO:0009507);; Molecular Function: transferase activity (GO:0016740);; Biological Process: developmental process (GO:0032502);; Biological Process: cellular metabolic process (GO:0044237);; Biologic…	--	--	[P]	Inorganic ion transport and metabolism	Rhodanese-like domain	Thiosulfate sulfurtransferase 18 OS=Arabidopsis thaliana OX=3702 GN=STR18 PE=1 SV=1	PREDICTED: uncharacterized protein LOC101221593 isoform X1 [Cucumis sativus]
Csa6G507100	3.90984	5.91312	6.43109	2.29087	2.35019	3.28301	2.08666	1.82157	2.41393	-1.02502	down	-1.38353	down	-0.349839	normal	[P]	Inorganic ion transport and metabolism	Molecular Function: peroxidase activity (GO:0004601);; Cellular Component: vacuole (GO:0005773);; Cellular Component: peroxisome (GO:0005777);; Biological Process: response to oxidative stress (GO:0006979);; Cellular Component: chloroplast (GO:0009507);; Molecular Function: L-ascorbate peroxidase activity (GO:0016688);; Molecular Function: heme binding (GO:0020037);; Cellular Component: organelle…	K00434|0|csv:101220337|K00434 L-ascorbate peroxidase [EC:1.11.1.11] | (RefSeq) probable L-ascorbate peroxidase 3	Ascorbate and aldarate metabolism (ko00053);; Glutathione metabolism (ko00480)	--	--	Peroxidase	Probable L-ascorbate peroxidase 3 OS=Oryza sativa subsp. indica OX=39946 GN=APX3 PE=2 SV=1	PREDICTED: probable L-ascorbate peroxidase 3 [Cucumis sativus]
Csa6G507250	5.1909	4.21386	8.20496	2.01463	3.31622	4.74724	0.914752	1.04694	1.79306	-0.792225	down	-2.28384	down	-1.48164	down	--	--	Biological Process: amino acid transport (GO:0006865);; Biological Process: metabolic process (GO:0008152);; Molecular Function: hydrolase activity (GO:0016787);; Cellular Component: anchored component of membrane (GO:0031225);;	--	--	[O]	Posttranslational modification, protein turnover, chaperones	Xylanase inhibitor N-terminal;; Eukaryotic aspartyl protease;; Xylanase inhibitor C-terminal	Aspartyl protease family protein 1 OS=Arabidopsis thaliana OX=3702 GN=APF1 PE=1 SV=1	hypothetical protein Csa_6G507250 [Cucumis sativus]
Csa6G507390	15.5291	9.70006	9.73176	7.34637	9.40298	9.5624	12.9418	12.3421	14.4381	-0.596487	down	-1.28695	down	-0.683374	down	[S]	Function unknown	Biological Process: maltose metabolic process (GO:0000023);; Molecular Function: NAD(P)H dehydrogenase (quinone) activity (GO:0003955);; Biological Process: pentose-phosphate shunt (GO:0006098);; Cellular Component: chloroplast (GO:0009507);; Biological Process: photosystem II assembly (GO:0010207);; Cellular Component: membrane (GO:0016020);; Biological Process: starch biosynthetic process (GO:0…	--	--	--	--	Vitamin K epoxide reductase family	Thiol-disulfide oxidoreductase LTO1 OS=Arabidopsis thaliana OX=3702 GN=LTO1 PE=1 SV=1	PREDICTED: thiol-disulfide oxidoreductase LTO1 [Cucumis sativus]
Csa6G513550	3.66005	6.13189	4.59311	1.64426	1.61419	2.05465	2.24303	1.17016	1.91092	-1.44448	down	-1.43665	down	0.0156187	normal	--	--	Molecular Function: aspartic-type endopeptidase activity (GO:0004190);; Cellular Component: vacuole (GO:0005773);; Cellular Component: endoplasmic reticulum (GO:0005783);; Biological Process: proteolysis (GO:0006508);; Biological Process: lipid metabolic process (GO:0006629);; Biological Process: response to salt stress (GO:0009651);; Biological Process: response to cadmium ion (GO:0046686);;	K08245|0|csv:101221973|K08245 phytepsin [EC:3.4.23.40] | (RefSeq) aspartic proteinase-like	--	[O]	Posttranslational modification, protein turnover, chaperones	Eukaryotic aspartyl protease;; Xylanase inhibitor N-terminal;; Saposin-like type B, region 1;; Saposin-like type B, region 2	Aspartic proteinase A2 OS=Arabidopsis thaliana OX=3702 GN=APA2 PE=2 SV=1	PREDICTED: aspartic proteinase-like [Cucumis sativus]
Csa6G516920	10.6231	9.09226	11.8297	5.10351	6.11022	8.52463	3.42842	3.60248	4.16435	-0.664938	down	-1.55326	down	-0.880218	down	[G]	Carbohydrate transport and metabolism	Molecular Function: sugar:proton symporter activity (GO:0005351);; Cellular Component: nucleus (GO:0005634);; Cellular Component: vacuole (GO:0005773);; Cellular Component: plasma membrane (GO:0005886);; Cellular Component: plasmodesma (GO:0009506);; Biological Process: response to nematode (GO:0009624);; Biological Process: systemic acquired resistance (GO:0009627);; Biological Process: response…	--	--	[R]	General function prediction only	Sugar (and other) transporter;; Major Facilitator Superfamily	Sugar carrier protein C OS=Ricinus communis OX=3988 GN=STC PE=2 SV=1	PREDICTED: sugar carrier protein C-like [Cucumis sativus]
Csa6G516990	10.604	12.2745	8.45591	5.17995	5.31991	6.2867	4.92929	2.51543	5.29604	-0.888939	down	-1.3574	down	--	--	--	--	--	--	--	--	--	--	--	hypothetical protein Csa_6G516990 [Cucumis sativus]
Csa6G519710	1.119	16.0854	5.64356	1.10498	1.35707	1.20868	2.50669	1.65059	3.27951	-2.583	down	-1.65005	down	0.94311	up	--	--	--	--	--	--	--	--	--	PREDICTED: uncharacterized protein LOC101213083 [Cucumis sativus]
Csa6G520430	5.08572	4.68638	6.9289	1.12726	0.981025	0.652847	3.4808	3.45825	2.39448	-2.56184	down	-0.891281	down	1.68017	up	[O]	Posttranslational modification, protein turnover, chaperones	Molecular Function: serine-type endopeptidase activity (GO:0004252);; Cellular Component: extracellular region (GO:0005576);; Cellular Component: cell wall (GO:0005618);; Biological Process: proteolysis (GO:0006508);; Cellular Component: cytoplasmic vesicle (GO:0016023);; Molecular Function: oxidoreductase activity (GO:0016491);;	--	--	--	--	Subtilase family;; Peptidase inhibitor I9;; PA domain	Subtilisin-like protease SBT5.6 OS=Arabidopsis thaliana OX=3702 GN=SBT5.6 PE=2 SV=1	PREDICTED: subtilisin-like protease SBT5.3 [Cucumis sativus]
Csa6G522730	0.828028	0.773872	2.02955	0.002964	0	0.004774	0.003481	0.002379	0.002886	-6.85818	down	-6.55446	down	--	--	[G]	Carbohydrate transport and metabolism	Biological Process: carbohydrate metabolic process (GO:0005975);; Molecular Function: beta-glucosidase activity (GO:0008422);; Cellular Component: cytoplasmic vesicle (GO:0016023);;	K15920|0|pxb:103951258|K15920 beta-D-xylosidase 4 [EC:3.2.1.37] | (RefSeq) beta-xylosidase/alpha-L-arabinofuranosidase 1-like	Starch and sucrose metabolism (ko00500);; Amino sugar and nucleotide sugar metabolism (ko00520)	--	--	Glycosyl hydrolase family 3 C-terminal domain;; Glycosyl hydrolase family 3 N terminal domain	Probable beta-D-xylosidase 5 OS=Arabidopsis thaliana OX=3702 GN=BXL5 PE=2 SV=2	hypothetical protein Csa_6G522730 [Cucumis sativus]
Csa6G522820	29.1751	26.8064	29.7943	15.0377	16.0294	21.0458	14.5917	15.9963	16.2855	-0.707199	down	-0.930246	down	-0.215265	normal	[QV]	Secondary metabolites biosynthesis, transport and catabolism;; Defense mechanisms	Molecular Function: C-22 sterol desaturase activity (GO:0000249);; Molecular Function: monooxygenase activity (GO:0004497);; Molecular Function: iron ion binding (GO:0005506);; Cellular Component: extracellular region (GO:0005576);; Biological Process: lipid biosynthetic process (GO:0008610);; Molecular Function: electron carrier activity (GO:0009055);; Biological Process: toxin catabolic process…	K09832|0|csv:101221194|K09832 sterol 22-desaturase [EC:1.14.19.41] | (RefSeq) cytochrome P450 710A1-like	Steroid biosynthesis (ko00100)	[QI]	Secondary metabolites biosynthesis, transport and catabolism;; Lipid transport and metabolism	Cytochrome P450	Cytochrome P450 710A11 OS=Solanum lycopersicum OX=4081 GN=CYP710A11 PE=1 SV=1	PREDICTED: cytochrome P450 710A1-like [Cucumis sativus]
Csa6G523410	0.579271	2.12127	1.65471	0.414002	0.596431	0.387729	0.235102	0.118095	0.248936	-1.68283	down	-2.54975	down	--	--	--	--	Cellular Component: extracellular region (GO:0005576);; Biological Process: carbohydrate metabolic process (GO:0005975);; Biological Process: xylem development (GO:0010089);; Molecular Function: glucan endo-1,3-beta-D-glucosidase activity (GO:0042973);; Molecular Function: cation binding (GO:0043169);; Biological Process: cell wall macromolecule metabolic process (GO:0044036);;	--	--	--	--	Glycosyl hydrolases family 17	Glucan endo-1,3-beta-glucosidase 11 OS=Arabidopsis thaliana OX=3702 GN=At1g32860 PE=1 SV=1	PREDICTED: glucan endo-1,3-beta-glucosidase 11-like isoform X1 [Cucumis sativus]
Csa6G525430	5.84175	27.183	17.0866	4.8214	7.48542	5.91709	9.20656	7.62605	7.70965	-1.42443	down	-1.0673	down	0.367305	normal	--	--	Molecular Function: transcription factor activity, sequence-specific DNA binding (GO:0003700);; Cellular Component: nucleus (GO:0005634);; Biological Process: regulation of transcription, DNA-templated (GO:0006355);; Biological Process: sister chromatid cohesion (GO:0007062);; Biological Process: reciprocal meiotic recombination (GO:0007131);; Biological Process: cell adhesion (GO:0007155);; Biol…	K09338|0|csv:101210154|K09338 homeobox-leucine zipper protein | (RefSeq) homeobox-leucine zipper protein ATHB-14-like	--	--	--	MEKHLA domain;; START domain;; Homeobox domain	Homeobox-leucine zipper protein ATHB-14 OS=Arabidopsis thaliana OX=3702 GN=ATHB-14 PE=1 SV=1	PREDICTED: homeobox-leucine zipper protein ATHB-14-like [Cucumis sativus]
Csa7G004020	93.9789	65.7948	84.541	50.7895	47.7717	54.6506	7.18095	11.051	7.40782	-0.664328	down	-3.3115	down	-2.63971	down	[R]	General function prediction only	Biological Process: response to cadmium ion (GO:0046686);;	--	--	--	--	NmrA-like family;; NAD(P)H-binding;; 3-beta hydroxysteroid dehydrogenase/isomerase family;; NAD dependent epimerase/dehydratase family	Isoflavone reductase homolog PCBER OS=Populus trichocarpa OX=3694 GN=PCBER PE=1 SV=1	PREDICTED: isoflavone reductase-like protein [Cucumis sativus]
Csa7G009210	5.37316	4.05599	4.44582	1.58736	1.35669	2.58705	0.563233	0.357759	0.442623	-1.31017	down	-3.14274	down	-1.82651	down	[G]	Carbohydrate transport and metabolism	Molecular Function: sucrose alpha-glucosidase activity (GO:0004575);; Cellular Component: nucleus (GO:0005634);; Cellular Component: cytosol (GO:0005829);; Biological Process: metabolic process (GO:0008152);; Molecular Function: glycopeptide alpha-N-acetylgalactosaminidase activity (GO:0033926);;	--	--	--	--	Alkaline and neutral invertase;; Amylo-alpha-1,6-glucosidase	Probable alkaline/neutral invertase B OS=Arabidopsis thaliana OX=3702 GN=INVB PE=1 SV=1	PREDICTED: probable alkaline/neutral invertase B [Cucumis sativus]
Csa7G017710	8.24239	4.9231	5.17207	2.8714	2.36512	3.88409	0.971789	0.342587	0.955437	-0.997608	down	-3.06455	down	-2.05937	down	[K]	Transcription	Molecular Function: methyltransferase activity (GO:0008168);; Molecular Function: O-methyltransferase activity (GO:0008171);;	--	--	[R]	General function prediction only	O-methyltransferase;; Dimerisation domain	Acetylserotonin O-methyltransferase OS=Arabidopsis thaliana OX=3702 GN=ASMT PE=1 SV=1	PREDICTED: (R,S)-reticuline 7-O-methyltransferase-like [Cucumis sativus]
Csa7G018820	1.55429	20.0972	16.5819	0.61453	1.31838	0.90492	0.55741	0.487466	0.681075	-3.68756	down	-4.4749	down	--	--	--	--	Cellular Component: extracellular region (GO:0005576);; Cellular Component: cell wall (GO:0005618);; Biological Process: sexual reproduction (GO:0019953);;	--	--	--	--	Lytic transglycolase	Expansin-like A1 OS=Arabidopsis thaliana OX=3702 GN=EXLA1 PE=2 SV=1	hypothetical protein Csa_7G018820 [Cucumis sativus]
Csa7G027790	0.785817	2.96125	1.8219	0.357975	0.880769	0.26137	0.228898	0.237845	0.238626	-1.83323	down	-2.95783	down	--	--	[O]	Posttranslational modification, protein turnover, chaperones	Cellular Component: plant-type vacuole (GO:0000325);; Cellular Component: extracellular region (GO:0005576);; Cellular Component: cell wall (GO:0005618);; Cellular Component: nucleus (GO:0005634);; Biological Process: proteolysis (GO:0006508);; Molecular Function: cysteine-type peptidase activity (GO:0008234);; Cellular Component: chloroplast (GO:0009507);; Biological Process: regulation of meris…	K16290|0|csv:101206340|K16290 xylem cysteine proteinase [EC:3.4.22.-] | (RefSeq) xylem cysteine proteinase 1-like	--	[O]	Posttranslational modification, protein turnover, chaperones	Papain family cysteine protease;; Cathepsin propeptide inhibitor domain (I29)	Cysteine protease XCP1 OS=Arabidopsis thaliana OX=3702 GN=XCP1 PE=1 SV=1	PREDICTED: xylem cysteine proteinase 1-like [Cucumis sativus]
Csa7G030520	15.3857	8.83939	22.5383	6.50222	4.76299	10.0201	2.3254	3.02359	3.50802	-1.12526	down	-2.4617	down	-1.32749	down	[O]	Posttranslational modification, protein turnover, chaperones	Molecular Function: serine-type endopeptidase activity (GO:0004252);; Cellular Component: extracellular region (GO:0005576);; Cellular Component: cell wall (GO:0005618);; Biological Process: proteolysis (GO:0006508);; Biological Process: response to auxin (GO:0009733);; Biological Process: lateral root morphogenesis (GO:0010102);; Biological Process: glucosinolate biosynthetic process (GO:0019761…	--	--	--	--	Subtilase family;; Peptidase inhibitor I9;; PA domain	Subtilisin-like protease SBT5.3 OS=Arabidopsis thaliana OX=3702 GN=AIR3 PE=2 SV=1	PREDICTED: subtilisin-like protease SBT5.3 [Cucumis sativus]
Csa7G039790	1.81524	2.28185	4.58648	1.275	1.12895	1.5555	0.535758	0.389024	0.690409	-1.10494	down	-2.45744	down	-1.34193	down	[H]	Coenzyme transport and metabolism	Molecular Function: O-methyltransferase activity (GO:0008171);;	--	--	[R]	General function prediction only	O-methyltransferase;; Dimerisation domain	Probable O-methyltransferase 3 OS=Humulus lupulus OX=3486 GN=OMT3 PE=2 SV=1	PREDICTED: trans-resveratrol di-O-methyltransferase [Cucumis sativus]
Csa7G041320	2.67389	4.21779	2.28058	1.65836	1.72914	1.45985	1.04634	1.12719	1.096	-0.910413	down	-1.53293	down	-0.615272	normal	--	--	Molecular Function: transferase activity, transferring glycosyl groups (GO:0016757);; Molecular Function: transferase activity, transferring hexosyl groups (GO:0016758);;	--	--	[GC]	Carbohydrate transport and metabolism;; Energy production and conversion	UDP-glucoronosyl and UDP-glucosyl transferase	UDP-glycosyltransferase 79B30 OS=Glycine max OX=3847 GN=FG3 PE=1 SV=1	PREDICTED: anthocyanidin 3-O-glucoside 2&apos;&apos;-O-glucosyltransferase-like [Cucumis sativus]
Csa7G041370	6.4904	28.6983	15.5241	3.51399	3.49458	5.2584	1.32265	0.57378	0.816902	-2.01038	down	-4.23828	down	-2.2194	down	--	--	Molecular Function: DNA binding (GO:0003677);; Biological Process: cellular aromatic compound metabolic process (GO:0006725);; Biological Process: nitrogen compound metabolic process (GO:0006807);; Biological Process: pattern specification process (GO:0007389);; Biological Process: post-embryonic animal morphogenesis (GO:0009886);; Biological Process: cellular biosynthetic process (GO:0044249);; …	--	--	[K]	Transcription	KNOX2 domain;; KNOX1 domain;; Homeobox KN domain;; ELK domain;; Homeobox domain	Homeobox protein SBH1 OS=Glycine max OX=3847 GN=H1 PE=2 SV=1	PREDICTED: homeobox protein knotted-1-like LET6 [Cucumis sativus]
Csa7G060690	44.8281	30.8048	31.6904	20.7833	18.9846	21.2096	4.51782	6.71527	3.12239	-0.811293	down	-2.92256	down	-2.1047	down	[P]	Inorganic ion transport and metabolism	Cellular Component: plasma membrane (GO:0005886);; Molecular Function: secondary active sulfate transmembrane transporter activity (GO:0008271);; Biological Process: sulfate transport (GO:0008272);; Biological Process: cellular response to sulfate starvation (GO:0009970);; Cellular Component: integral component of membrane (GO:0016021);; Biological Process: transmembrane transport (GO:0055085);; …	K17470|0|csv:101202746|K17470 sulfate transporter 1, high-affinity | (RefSeq) sulfate transporter 1.2-like	--	[P]	Inorganic ion transport and metabolism	Sulfate permease family;; STAS domain	High affinity sulfate transporter 2 OS=Stylosanthes hamata OX=37660 GN=ST2 PE=2 SV=1	hypothetical protein Csa_7G060690 [Cucumis sativus]
Csa7G062910	0.848602	1.92057	1.52555	0.40466	0.401364	0.376215	0.33685	0.259877	0.451093	-1.72927	down	-2.03793	down	--	--	[R]	General function prediction only	--	--	--	[DO]	Cell cycle control, cell division, chromosome partitioning;; Posttranslational modification, protein turnover, chaperones	Caspase domain	Metacaspase-1 OS=Arabidopsis thaliana OX=3702 GN=AMC1 PE=1 SV=1	PREDICTED: metacaspase-1-like [Cucumis sativus]
Csa7G066190	10.9716	8.35281	8.16829	3.7047	5.71353	4.64196	0.972023	2.3492	2.04265	-0.959633	down	-2.41288	down	-1.44482	down	--	--	--	--	--	--	--	--	--	hypothetical protein Csa_7G066190 [Cucumis sativus]
Csa7G073660	29.138	28.188	31.9996	15.7606	21.3499	18.5284	13.3385	15.3437	15.0575	-0.669248	down	-1.08692	down	-0.409102	normal	[R]	General function prediction only	Cellular Component: nucleus (GO:0005634);; Cellular Component: cytosol (GO:0005829);; Biological Process: polyamine catabolic process (GO:0006598);; Biological Process: response to wounding (GO:0009611);; Biological Process: coumarin biosynthetic process (GO:0009805);; Biological Process: lignin biosynthetic process (GO:0009809);; Biological Process: positive regulation of flavonoid biosynthetic …	K00588|0|csv:101205648|K00588 caffeoyl-CoA O-methyltransferase [EC:2.1.1.104] | (RefSeq) caffeoyl-CoA O-methyltransferase 5	Phenylalanine metabolism (ko00360);; Phenylpropanoid biosynthesis (ko00940);; Flavonoid biosynthesis (ko00941);; Stilbenoid, diarylheptanoid and gingerol biosynthesis (ko00945)	[Q]	Secondary metabolites biosynthesis, transport and catabolism	O-methyltransferase;; Methyltransferase domain	Caffeoyl-CoA O-methyltransferase 1 OS=Populus trichocarpa OX=3694 GN=CCOAOMT1 PE=2 SV=1	Caffeoyl-CoA O-methyltransferase [Cucumis sativus]
Csa7G074860	0.361333	0.851188	1.66611	0.278676	0.488348	0.601234	0.38196	0.463203	0.578964	-1.04837	down	-1.06779	down	-0.0068553	normal	--	--	Cellular Component: mitochondrion (GO:0005739);;	--	--	[R]	General function prediction only	PPR repeat family;; PPR repeat;; PPR repeat;; Pentatricopeptide repeat domain;; Pentacotripeptide-repeat region of PRORP;; DYW family of nucleic acid deaminases;; Tetratricopeptide repeat	Pentatricopeptide repeat-containing protein At3g02330, mitochondrial OS=Arabidopsis thaliana OX=3702 GN=PCMP-E90 PE=2 SV=2	PREDICTED: pentatricopeptide repeat-containing protein At3g02330 isoform X1 [Cucumis sativus]
Csa7G074930	42.7721	23.0569	20.3954	13.3804	9.37267	16.3505	1.462	2.65868	1.27307	-1.15252	down	-4.11699	down	-2.95944	down	[Q]	Secondary metabolites biosynthesis, transport and catabolism	Molecular Function: iron ion binding (GO:0005506);; Molecular Function: oxidoreductase activity, acting on single donors with incorporation of molecular oxygen, incorporation of two atoms of oxygen (GO:0016702);; Molecular Function: gibberellin 3-beta-dioxygenase activity (GO:0016707);; Molecular Function: flavonol synthase activity (GO:0045431);; Biological Process: flavonol biosynthetic process…	--	--	[QR]	Secondary metabolites biosynthesis, transport and catabolism;; General function prediction only	2OG-Fe(II) oxygenase superfamily	Probable 2-oxoglutarate-dependent dioxygenase At5g05600 OS=Arabidopsis thaliana OX=3702 GN=At5g05600 PE=2 SV=1	hypothetical protein Csa_7G074930 [Cucumis sativus]
Csa7G075610	2.47066	5.89373	4.42383	2.03099	3.05018	2.56583	1.76824	1.43531	1.62187	-0.726141	down	-1.45627	down	-0.721122	down	[G]	Carbohydrate transport and metabolism	--	--	--	--	--	Protein of unknown function, DUF547;; Leucine-zipper of ternary complex factor MIP1	--	PREDICTED: uncharacterized protein LOC101203131 [Cucumis sativus]
Csa7G091220	1.91131	2.03388	1.41912	0.793521	0.961412	0.990259	0.362213	0.730773	0.263243	-0.948504	down	-2.00807	down	-1.05335	down	[M]	Cell wall/membrane/envelope biogenesis	--	--	--	--	--	Membrane bound O-acyl transferase family	Probable long-chain-alcohol O-fatty-acyltransferase 8 OS=Arabidopsis thaliana OX=3702 GN=At1g34520 PE=3 SV=1	PREDICTED: probable long-chain-alcohol O-fatty-acyltransferase 6 [Cucumis sativus]
Csa7G106800	6.02037	4.50384	10.975	2.79672	4.01935	5.01866	1.68902	4.34879	2.67802	-0.851652	down	-1.35366	down	-0.492567	normal	--	--	--	--	--	--	--	--	Kiwellin OS=Actinidia deliciosa OX=3627 PE=1 SV=1	PREDICTED: kiwellin-like [Cucumis sativus]
Csa7G179120	6.12709	1.87953	2.7404	1.60905	1.97168	2.07423	0.635958	0.69585	0.496523	-0.927597	down	-2.60932	down	-1.67486	down	[M]	Cell wall/membrane/envelope biogenesis	Molecular Function: transferase activity (GO:0016740);;	--	--	--	--	Membrane bound O-acyl transferase family	Probable long-chain-alcohol O-fatty-acyltransferase 3 OS=Arabidopsis thaliana OX=3702 GN=AT3 PE=3 SV=1	PREDICTED: probable long-chain-alcohol O-fatty-acyltransferase 5 [Cucumis sativus]
Csa7G239610	3.14167	2.50859	2.40292	0.700738	0.725475	1.21797	0.199661	0.29903	0.333562	-1.59315	down	-3.27033	down	--	--	--	--	Molecular Function: zinc ion transmembrane transporter activity (GO:0005385);; Biological Process: iron ion transport (GO:0006826);; Biological Process: water transport (GO:0006833);; Molecular Function: zinc ion binding (GO:0008270);; Biological Process: response to zinc ion (GO:0010043);; Biological Process: cellular response to iron ion starvation (GO:0010106);; Cellular Component: integral co…	K14709|0|csv:101216720|K14709 solute carrier family 39 (zinc transporter), member 1/2/3 | (RefSeq) zinc transporter 1	--	[P]	Inorganic ion transport and metabolism	ZIP Zinc transporter	Zinc transporter 1 OS=Arabidopsis thaliana OX=3702 GN=ZIP1 PE=2 SV=1	PREDICTED: zinc transporter 1 [Cucumis sativus]
Csa7G253820	0.597039	0.868549	0.664949	0.044017	0.082143	0.157339	0.06303	0.046052	0	-2.78529	down	-4.01644	down	--	--	[G]	Carbohydrate transport and metabolism	Molecular Function: galactose transmembrane transporter activity (GO:0005354);; Molecular Function: glucose transmembrane transporter activity (GO:0005355);; Molecular Function: myo-inositol transmembrane transporter activity (GO:0005365);; Cellular Component: plasma membrane (GO:0005886);; Molecular Function: D-xylose transmembrane transporter activity (GO:0015148);; Molecular Function: glycerol…	--	--	[R]	General function prediction only	Sugar (and other) transporter;; Major Facilitator Superfamily	Polyol transporter 5 OS=Arabidopsis thaliana OX=3702 GN=PLT5 PE=1 SV=2	PREDICTED: polyol transporter 5-like [Cucumis sativus]
Csa7G322060	18.9718	27.4535	22.5882	9.63187	12.1362	13.4149	4.43313	4.79132	5.07884	-0.954403	down	-2.3233	down	-1.36092	down	[R]	General function prediction only	Biological Process: response to hypoxia (GO:0001666);; Molecular Function: alcohol dehydrogenase (NAD) activity (GO:0004022);; Cellular Component: cytosol (GO:0005829);; Cellular Component: plasma membrane (GO:0005886);; Molecular Function: zinc ion binding (GO:0008270);; Biological Process: response to salt stress (GO:0009651);; Biological Process: response to cadmium ion (GO:0046686);; Molecula…	K18857|0|csv:101206036|K18857 alcohol dehydrogenase class-P [EC:1.1.1.1] | (RefSeq) alcohol dehydrogenase class-P	Glycolysis / Gluconeogenesis (ko00010);; Fatty acid degradation (ko00071);; Tyrosine metabolism (ko00350);; alpha-Linolenic acid metabolism (ko00592)	[Q]	Secondary metabolites biosynthesis, transport and catabolism	Zinc-binding dehydrogenase;; Alcohol dehydrogenase GroES-like domain	Alcohol dehydrogenase 1 OS=Petunia hybrida OX=4102 GN=ADH1 PE=1 SV=1	PREDICTED: alcohol dehydrogenase class-P [Cucumis sativus]
Csa7G343870	328.079	283.563	215.115	162.865	176.008	151.511	73.9112	75.8368	72.5537	-0.744235	down	-1.9565	down	-1.20514	down	[GI]	Carbohydrate transport and metabolism;; Lipid transport and metabolism	Molecular Function: hydrolase activity (GO:0016787);; Biological Process: carboxylic acid metabolic process (GO:0019752);; Biological Process: primary metabolic process (GO:0044238);; Cellular Component: cell periphery (GO:0071944);; Biological Process: organonitrogen compound metabolic process (GO:1901564);; Biological Process: organic substance catabolic process (GO:1901575);;	K01051|0|csv:101220821|K01051 pectinesterase [EC:3.1.1.11] | (RefSeq) pectinesterase-like	Pentose and glucuronate interconversions (ko00040);; Starch and sucrose metabolism (ko00500)	--	--	Pectinesterase;; Plant invertase/pectin methylesterase inhibitor	Pectinesterase/pectinesterase inhibitor U1 OS=Solanum lycopersicum OX=4081 GN=PMEU1 PE=2 SV=1	PREDICTED: pectinesterase-like [Cucumis sativus]
Csa7G352500	10.4287	11.4325	9.95378	5.08411	8.03449	7.57673	2.39517	2.52026	2.56006	-0.608263	down	-2.14471	down	-1.52874	down	--	--	--	--	--	--	--	--	Membrane protein of ER body 1 OS=Arabidopsis thaliana OX=3702 GN=MEB1 PE=1 SV=1	PREDICTED: membrane protein of ER body 2-like [Cucumis sativus]
Csa7G387730	0.736552	1.61954	1.42339	0.290203	0.320574	0.308299	0.178982	0.273198	0.440481	-1.99498	down	-2.10075	down	--	--	--	--	Molecular Function: binding (GO:0005488);;	--	--	[R]	General function prediction only	Zinc finger, C2H2 type;; Zinc-finger double-stranded RNA-binding	Protein indeterminate-domain 12 OS=Arabidopsis thaliana OX=3702 GN=IDD12 PE=2 SV=2	hypothetical protein Csa_7G387730 [Cucumis sativus]
Csa7G395800	0.963586	1.61861	0.985296	0.456576	0.639209	0.550528	0.343764	0	0.188488	-1.07301	down	-2.70044	down	--	--	[O]	Posttranslational modification, protein turnover, chaperones	Molecular Function: glutathione transferase activity (GO:0004364);; Cellular Component: plastid envelope (GO:0009526);; Cellular Component: chloroplast part (GO:0044434);;	K00799|1.27566e-158|csv:101212771|K00799 glutathione S-transferase [EC:2.5.1.18] | (RefSeq) glutathione S-transferase PARB-like	Glutathione metabolism (ko00480)	[O]	Posttranslational modification, protein turnover, chaperones	Glutathione S-transferase, N-terminal domain;; Glutathione S-transferase, C-terminal domain;; Glutathione S-transferase, N-terminal domain;; Glutathione S-transferase, N-terminal domain;; Glutathione S-transferase, C-terminal domain;; Glutathione S-transferase, C-terminal domain	Glutathione S-transferase PARB OS=Nicotiana tabacum OX=4097 GN=PARB PE=2 SV=1	PREDICTED: glutathione S-transferase PARB-like [Cucumis sativus]
Csa7G396480	14.3089	28.3936	21.169	11.8871	14.7459	12.1243	9.41924	13.4987	9.66329	-0.696115	down	-1.01582	down	-0.311364	normal	[T]	Signal transduction mechanisms	Biological Process: response to molecule of fungal origin (GO:0002238);; Cellular Component: vacuole (GO:0005773);; Cellular Component: Golgi apparatus (GO:0005794);; Cellular Component: plasma membrane (GO:0005886);; Biological Process: response to stress (GO:0006950);;	--	--	--	--	Universal stress protein family	Universal stress protein A-like protein OS=Arabidopsis thaliana OX=3702 GN=At3g01520 PE=1 SV=2	PREDICTED: universal stress protein A-like protein [Cucumis sativus]
Csa7G406990	14.9279	14.1405	17.1596	7.81851	7.09027	12.1836	6.52305	6.8818	9.54676	-0.758479	down	-1.07041	down	-0.303679	normal	--	--	Molecular Function: binding (GO:0005488);;	--	--	--	--	--	Zinc finger protein 6 OS=Arabidopsis thaliana OX=3702 GN=ZFP6 PE=2 SV=1	PREDICTED: zinc finger protein 6-like [Cucumis sativus]
Csa7G414390	1.93177	4.33581	3.04329	0.682913	1.55324	0.485781	1.45964	2.08984	1.67127	-1.73137	down	-0.877557	down	0.864989	normal	[GI]	Carbohydrate transport and metabolism;; Lipid transport and metabolism	Cellular Component: cell wall (GO:0005618);; Molecular Function: pectinesterase activity (GO:0030599);; Biological Process: cell wall modification (GO:0042545);; Molecular Function: aspartyl esterase activity (GO:0045330);;	K01051|0|csv:101217414|K01051 pectinesterase [EC:3.1.1.11] | (RefSeq) probable pectinesterase 53	Pentose and glucuronate interconversions (ko00040);; Starch and sucrose metabolism (ko00500)	--	--	Pectinesterase	Probable pectinesterase 53 OS=Arabidopsis thaliana OX=3702 GN=PME53 PE=2 SV=1	PREDICTED: probable pectinesterase 53 [Cucumis sativus]
Csa7G414430	2.03646	2.38204	1.49122	0.02887	0	0.034772	0.026827	0	0	-5.83519	down	-7.4663	down	--	--	[G]	Carbohydrate transport and metabolism	Molecular Function: polygalacturonase activity (GO:0004650);; Cellular Component: extracellular region (GO:0005576);; Biological Process: carbohydrate metabolic process (GO:0005975);; Molecular Function: galacturan 1,4-alpha-galacturonidase activity (GO:0047911);;	--	--	--	--	Glycosyl hydrolases family 28;; Pectate lyase superfamily protein	Polygalacturonase At1g48100 OS=Arabidopsis thaliana OX=3702 GN=At1g48100 PE=2 SV=1	PREDICTED: polygalacturonase At1g48100 [Cucumis sativus]
Csa7G414460	28.947	23.9735	27.6779	13.1314	20.1358	17.7361	11.6606	22.2501	6.92559	-0.628062	down	-1.04259	down	-0.407478	normal	[IQR]	Lipid transport and metabolism;; Secondary metabolites biosynthesis, transport and catabolism;; General function prediction only	Molecular Function: copper ion binding (GO:0005507);; Molecular Function: 2,3-dihydro-2,3-dihydroxybenzoate dehydrogenase activity (GO:0008667);; Molecular Function: testosterone dehydrogenase [NAD(P)] activity (GO:0030283);; Biological Process: oxidation-reduction process (GO:0055114);;	--	--	[R]	General function prediction only	Enoyl-(Acyl carrier protein) reductase;; short chain dehydrogenase;; KR domain	Short-chain dehydrogenase reductase 3b OS=Arabidopsis thaliana OX=3702 GN=SDR3b PE=2 SV=1	PREDICTED: short-chain dehydrogenase reductase 3b-like [Cucumis sativus]
Csa7G420760	4.30928	2.54474	2.79296	2.07327	1.89431	1.59969	0.607612	1.79799	0.730346	-0.768738	down	-1.67723	down	-0.89982	normal	--	--	--	--	--	--	--	--	Uncharacterized protein At5g23160 OS=Arabidopsis thaliana OX=3702 GN=At5g23160 PE=2 SV=1	PREDICTED: uncharacterized protein LOC105436182 isoform X1 [Cucumis sativus]
Csa7G428260	3.60933	3.31009	4.16193	0.731169	0.937805	1.21322	0.18194	0.41685	0.24519	-1.91859	down	-3.72177	down	--	--	--	--	Molecular Function: nucleic acid binding (GO:0003676);; Molecular Function: binding (GO:0005488);; Cellular Component: nucleus (GO:0005634);; Biological Process: regulation of transcription, DNA-templated (GO:0006355);; Biological Process: plant-type cell wall modification (GO:0009827);; Biological Process: pollen tube growth (GO:0009860);; Biological Process: transmitting tissue development (GO:…	--	--	[R]	General function prediction only	Zinc finger, C2H2 type	Zinc finger protein WIP2 OS=Arabidopsis thaliana OX=3702 GN=WIP2 PE=1 SV=1	PREDICTED: zinc finger protein WIP2-like [Cucumis sativus]
Csa7G428990	9.44519	18.2549	9.16141	4.42017	4.9905	5.2845	3.82612	3.61383	4.04678	-1.31154	down	-1.98466	down	-0.66578	down	[G]	Carbohydrate transport and metabolism	Molecular Function: hydrolase activity, hydrolyzing O-glycosyl compounds (GO:0004553);; Biological Process: carbohydrate metabolic process (GO:0005975);; Molecular Function: beta-glucosidase activity (GO:0008422);; Biological Process: carbohydrate catabolic process (GO:0016052);;	K01188|0|csv:101221825|K01188 beta-glucosidase [EC:3.2.1.21] | (RefSeq) vicianin hydrolase	Cyanoamino acid metabolism (ko00460);; Starch and sucrose metabolism (ko00500);; Phenylpropanoid biosynthesis (ko00940)	[G]	Carbohydrate transport and metabolism	Glycosyl hydrolase family 1	Vicianin hydrolase (Fragment) OS=Vicia sativa subsp. nigra OX=3909 PE=1 SV=1	PREDICTED: vicianin hydrolase [Cucumis sativus]
Csa7G429520	16.0774	19.6267	16.1906	10.9081	11.7256	10.1273	5.9858	6.53159	7.11838	-0.640606	down	-1.45738	down	-0.808465	down	--	--	Molecular Function: DNA binding (GO:0003677);; Biological Process: transcription, DNA-templated (GO:0006351);;	K09338|0|csv:101221600|K09338 homeobox-leucine zipper protein | (RefSeq) homeobox-leucine zipper protein HOX11-like	--	[K]	Transcription	Homeobox domain;; Homeobox associated leucine zipper;; Homeobox KN domain	Homeobox-leucine zipper protein HAT14 OS=Arabidopsis thaliana OX=3702 GN=HAT14 PE=2 SV=3	PREDICTED: homeobox-leucine zipper protein HOX11-like [Cucumis sativus]
Csa7G430130	3.30936	7.17048	3.1572	1.26002	2.43286	1.87481	1.32776	1.8473	0.926353	-1.26349	down	-1.76853	down	-0.498007	normal	--	--	Cellular Component: plasma membrane (GO:0005886);; Biological Process: lipid transport (GO:0006869);; Molecular Function: lipid binding (GO:0008289);; Cellular Component: anchored component of membrane (GO:0031225);;	--	--	--	--	Probable lipid transfer;; Protease inhibitor/seed storage/LTP family	Protein YLS3 OS=Arabidopsis thaliana OX=3702 GN=YLS3 PE=2 SV=1	PREDICTED: protein YLS3 [Cucumis sativus]
Csa7G430170	0.18702	3.32775	2.21007	0.296096	0.731725	0.08943	0.432821	0.205691	0.622547	-2.28597	down	-2.18612	down	--	--	--	--	--	--	--	--	--	Plant protein of unknown function (DUF936)	--	PREDICTED: uncharacterized protein LOC101207708 [Cucumis sativus]
Csa7G431330	10.0132	11.3413	8.36643	4.06466	6.73036	5.85652	2.4208	5.22025	2.60047	-0.765847	down	-1.50086	down	-0.727964	normal	--	--	Biological Process: transcription, DNA-templated (GO:0006351);; Biological Process: response to stress (GO:0006950);; Cellular Component: plastid (GO:0009536);; Biological Process: response to abiotic stimulus (GO:0009628);; Biological Process: regulation of biological process (GO:0050789);; Biological Process: response to oxygen-containing compound (GO:1901700);;	K09285|0|csv:101206499|K09285 AP2-like factor, ANT lineage | (RefSeq) AP2-like ethylene-responsive transcription factor At1g16060	--	--	--	AP2 domain	AP2-like ethylene-responsive transcription factor At1g16060 OS=Arabidopsis thaliana OX=3702 GN=At1g16060 PE=2 SV=1	PREDICTED: AP2-like ethylene-responsive transcription factor At1g16060 [Cucumis sativus]
Csa7G433250	1.6619	6.04249	3.56782	1.24978	1.74835	1.59874	0.771827	0.818375	1.44836	-1.25905	down	-1.93904	down	-0.671358	normal	--	--	--	--	--	[S]	Function unknown	--	Late embryogenesis abundant protein 2 OS=Cicer arietinum OX=3827 PE=2 SV=1	hypothetical protein Csa_7G433250 [Cucumis sativus]
Csa7G433950	61.9886	42.6798	40.7499	33.0517	28.6473	31.6408	11.9248	15.745	9.13055	-0.647478	down	-2.0901	down	-1.43641	down	[T]	Signal transduction mechanisms	Molecular Function: ATP binding (GO:0005524);; Biological Process: obsolete ATP catabolic process (GO:0006200);; Molecular Function: ATPase-coupled organic phosphonate transmembrane transporter activity (GO:0015416);; Molecular Function: heme-transporting ATPase activity (GO:0015439);; Cellular Component: membrane (GO:0016020);;	--	--	[Q]	Secondary metabolites biosynthesis, transport and catabolism	ABC-2 type transporter;; ABC transporter;; Plant PDR ABC transporter associated;; ABC-transporter extracellular N-terminal;; AAA domain, putative AbiEii toxin, Type IV TA system;; AAA domain;; ATPase family associated with various cellular activities (AAA)	Pleiotropic drug resistance protein 1 OS=Nicotiana tabacum OX=4097 GN=PDR1 PE=2 SV=1	PREDICTED: pleiotropic drug resistance protein 1-like isoform X1 [Cucumis sativus]
Csa7G446960	1.54349	2.97166	1.77901	0.706109	0.670889	0.877916	1.32414	1.22983	0.960596	-1.4432	down	-0.878643	down	0.571584	normal	[CHR]	Energy production and conversion;; Coenzyme transport and metabolism;; General function prediction only	Cellular Component: cytosol (GO:0005829);; Biological Process: oxidative photosynthetic carbon pathway (GO:0009854);; Molecular Function: hydroxypyruvate reductase activity (GO:0016618);; Molecular Function: glyoxylate reductase (NADP) activity (GO:0030267);; Molecular Function: glyoxylate reductase activity (GO:0047964);; Molecular Function: NAD binding (GO:0051287);; Biological Process: oxidati…	K15919|0|csv:101220677|K15919 hydroxypyruvate reductase 2 | (RefSeq) glyoxylate/hydroxypyruvate reductase A HPR2	Glycine, serine and threonine metabolism (ko00260);; Glyoxylate and dicarboxylate metabolism (ko00630);; Carbon metabolism (ko01200)	[C]	Energy production and conversion	D-isomer specific 2-hydroxyacid dehydrogenase, NAD binding domain;; D-isomer specific 2-hydroxyacid dehydrogenase, catalytic domain;; NAD binding domain of 6-phosphogluconate dehydrogenase	Hydroxyphenylpyruvate reductase OS=Plectranthus scutellarioides OX=4142 GN=HPPR PE=1 SV=2	PREDICTED: glyoxylate/hydroxypyruvate reductase A HPR2 [Cucumis sativus]
Csa7G451980	2.5202	1.55367	1.21252	0.634666	0.672233	1.20925	1.06093	0.795955	0.469331	-1.05273	down	-1.24257	down	--	--	--	--	--	--	--	--	--	--	--	hypothetical protein Csa_7G451980 [Cucumis sativus]
Csa7G452040	1.44402	1.03938	0.917253	0.50003	0.071607	0.06676	0.242378	0.563762	0.652522	-2.26535	down	-1.27604	down	--	--	--	--	Molecular Function: binding (GO:0005488);; Biological Process: regulation of transcription, DNA-templated (GO:0006355);;	--	--	--	--	Helix-loop-helix DNA-binding domain	Transcription factor bHLH87 OS=Arabidopsis thaliana OX=3702 GN=BHLH87 PE=1 SV=1	PREDICTED: transcription factor bHLH87 [Cucumis sativus]
Csa7G452290	0.762143	3.16376	1.73178	0.292312	0.418809	0.33546	0.147024	0.048404	0.269449	-2.36466	down	-3.55687	down	--	--	[IR]	Lipid transport and metabolism;; General function prediction only	Biological Process: lipid metabolic process (GO:0006629);; Molecular Function: hydrolase activity, acting on ester bonds (GO:0016788);;	--	--	--	--	GDSL-like Lipase/Acylhydrolase	GDSL esterase/lipase APG OS=Arabidopsis thaliana OX=3702 GN=APG PE=2 SV=1	PREDICTED: GDSL esterase/lipase APG [Cucumis sativus]
Csa7G452920	5.62182	13.581	8.89142	2.55531	2.78998	5.63871	1.60619	1.92008	2.95015	-1.33011	down	-2.15177	down	-0.813501	normal	--	--	--	--	--	--	--	Cotton fibre expressed protein	--	PREDICTED: uncharacterized protein LOC101213351 [Cucumis sativus]
Csa7G452940	4.39415	12.5235	8.25841	4.38082	6.10226	4.91824	5.66156	4.14179	5.61089	-0.825608	down	-0.795488	down	0.0393524	normal	--	--	Molecular Function: transcription factor activity, sequence-specific DNA binding (GO:0003700);; Cellular Component: nucleus (GO:0005634);; Biological Process: regulation of transcription, DNA-templated (GO:0006355);; Biological Process: cellular response to nitrogen starvation (GO:0006995);; Biological Process: cell adhesion (GO:0007155);; Biological Process: polarity specification of adaxial/aba…	K09338|0|csv:101213106|K09338 homeobox-leucine zipper protein | (RefSeq) homeobox-leucine zipper protein ATHB-15	--	--	--	START domain;; MEKHLA domain;; Homeobox domain	Homeobox-leucine zipper protein ATHB-15 OS=Arabidopsis thaliana OX=3702 GN=ATHB-15 PE=1 SV=1	PREDICTED: homeobox-leucine zipper protein ATHB-15 isoform X2 [Cucumis sativus]
CsaUNG006260	26.3368	23.4666	26.6431	11.014	13.9727	14.5948	2.82805	3.86781	2.82092	-0.885853	down	-3.34278	down	-2.45038	down	[I]	Lipid transport and metabolism	Molecular Function: acetate-CoA ligase activity (GO:0003987);; Cellular Component: cytosol (GO:0005829);; Biological Process: gluconeogenesis (GO:0006094);; Biological Process: cytoskeleton organization (GO:0007010);; Cellular Component: chloroplast stroma (GO:0009570);; Biological Process: proteasomal protein catabolic process (GO:0010498);; Molecular Function: AMP binding (GO:0016208);; Biologi…	K01895|0|cmo:103502952|K01895 acetyl-CoA synthetase [EC:6.2.1.1] | (RefSeq) acetyl-coenzyme A synthetase, chloroplastic/glyoxysomal-like	Glycolysis / Gluconeogenesis (ko00010);; Pyruvate metabolism (ko00620);; Propanoate metabolism (ko00640);; Carbon metabolism (ko01200)	[I]	Lipid transport and metabolism	AMP-binding enzyme;; AMP-binding enzyme C-terminal domain;; Acetyl-coenzyme A synthetase N-terminus	Acetyl-coenzyme A synthetase, chloroplastic/glyoxysomal OS=Arabidopsis thaliana OX=3702 GN=ACS PE=1 SV=1	PREDICTED: acetyl-coenzyme A synthetase, chloroplastic/glyoxysomal-like [Cucumis melo]
CsaUNG008290	2.46956	7.87637	4.90908	2.18304	1.51324	2.10553	2.45612	3.20993	2.90181	-1.36266	down	-0.87478	down	0.495817	normal	--	--	Molecular Function: aspartic-type endopeptidase activity (GO:0004190);; Cellular Component: extracellular region (GO:0005576);; Biological Process: proteolysis (GO:0006508);;	--	--	[O]	Posttranslational modification, protein turnover, chaperones	Xylanase inhibitor N-terminal;; Xylanase inhibitor C-terminal;; Eukaryotic aspartyl protease	Protein ASPARTIC PROTEASE IN GUARD CELL 2 OS=Arabidopsis thaliana OX=3702 GN=ASPG2 PE=2 SV=1	PREDICTED: protein ASPARTIC PROTEASE IN GUARD CELL 2 [Cucumis sativus]
Cucumis_sativus_newGene_101	8.39631	13.0784	13.8767	6.63549	6.30653	5.74559	5.46274	4.01045	2.8686	-0.893186	down	-1.56242	down	-0.660814	normal	--	--	--	--	--	--	--	--	--	--
Cucumis_sativus_newGene_1030	3.69316	9.24744	3.8768	4.20791	1.96046	2.0762	1.92169	1.41992	0.708682	-0.992903	down	-2.08168	down	-1.08231	down	--	--	--	--	--	--	--	--	--	PREDICTED: extensin-like [Cucumis sativus]
Cucumis_sativus_newGene_1220	1.17128	1.57525	1.44228	0.381123	0.776204	0.68893	0.088587	0.315535	0.179127	-1.14618	down	-2.741	down	--	--	--	--	--	--	--	[GMW]	Carbohydrate transport and metabolism;; Cell wall/membrane/envelope biogenesis;; Extracellular structures	Exostosin family	Xyloglucan-specific galacturonosyltransferase 1 OS=Arabidopsis thaliana OX=3702 GN=GT16 PE=2 SV=1	PREDICTED: xyloglucan-specific galacturonosyltransferase 1-like [Cucumis melo]
Cucumis_sativus_newGene_1374	0.432641	2.72436	1.15561	0.406485	0.890614	0.286004	0.628317	0.490465	0.551663	-1.4084	down	-1.39674	down	--	--	--	--	--	--	--	--	--	Stress up-regulated Nod 19	--	hypothetical protein Csa_1G024275 [Cucumis sativus]
Cucumis_sativus_newGene_209	2.71974	0.99698	1.23705	0.670725	0.419099	0.766973	0.72991	0.521172	0.413936	-1.40588	down	-1.62962	down	-0.218009	normal	--	--	Cellular Component: membrane (GO:0016020);; Molecular Function: ion binding (GO:0043167);; Molecular Function: organic cyclic compound binding (GO:0097159);; Molecular Function: heterocyclic compound binding (GO:1901363);;	--	--	[R]	General function prediction only	--	Retrovirus-related Pol polyprotein from transposon RE1 OS=Arabidopsis thaliana OX=3702 GN=RE1 PE=2 SV=1	PREDICTED: uncharacterized protein LOC103485923 [Cucumis melo]
Cucumis_sativus_newGene_223	3.07197	7.00505	5.37575	2.22219	2.32729	3.35888	1.98889	2.22855	2.90752	-0.939452	down	-1.16499	down	-0.217067	normal	[O]	Posttranslational modification, protein turnover, chaperones	--	--	--	[V]	Defense mechanisms	Serpin (serine protease inhibitor)	Serpin-ZX OS=Arabidopsis thaliana OX=3702 GN=At1g47710 PE=1 SV=1	PREDICTED: serpin-ZX-like [Cucumis sativus]
Cucumis_sativus_newGene_324	1.11453	3.26737	1.30821	1.14259	1.18313	1.01712	0.607101	0.712331	0.634519	-0.917492	down	-1.48045	down	-0.555755	normal	[M]	Cell wall/membrane/envelope biogenesis	Molecular Function: protein serine/threonine kinase activity (GO:0004674);; Molecular Function: ATP binding (GO:0005524);; Biological Process: protein phosphorylation (GO:0006468);; Cellular Component: integral component of membrane (GO:0016021);;	--	--	--	--	Protein kinase domain;; Protein tyrosine kinase;; Leucine rich repeat;; Leucine Rich repeats (2 copies);; Leucine rich repeat N-terminal domain;; Leucine Rich Repeat	Protein NSP-INTERACTING KINASE 2 OS=Arabidopsis thaliana OX=3702 GN=NIK2 PE=1 SV=1	PREDICTED: protein NSP-INTERACTING KINASE 2-like [Cucumis sativus]
Cucumis_sativus_newGene_569	8.04732	4.22404	4.91323	3.39938	2.28939	2.73122	0.387111	0.794905	0.448619	-1.0144	down	-3.37911	down	-2.35734	down	--	--	--	--	--	--	--	--	--	uncharacterized protein LOC111025354 [Momordica charantia]
Cucumis_sativus_newGene_808	1.56335	1.02988	0.823347	0.832538	0.432332	0.539039	0.191026	0.13989	0.118224	-0.889303	down	-2.85988	down	--	--	--	--	--	--	--	--	--	--	--	--
Cucumis_sativus_newGene_815	1.8259	4.09041	4.75647	1.23535	1.39364	1.2643	1.66184	1.39688	1.2707	-1.41993	down	-1.34221	down	0.0876666	normal	[R]	General function prediction only	Molecular Function: purine-specific mismatch base pair DNA N-glycosylase activity (GO:0000701);; Cellular Component: nucleus (GO:0005634);; Cellular Component: cytosol (GO:0005829);; Biological Process: cytokinin biosynthetic process (GO:0009691);; Molecular Function: single-strand selective uracil DNA N-glycosylase activity (GO:0017065);; Molecular Function: DNA-3-methylbase glycosylase activity…	K06966|6.85072e-138|csv:101216571|K06966 uncharacterized protein | (RefSeq) cytokinin riboside 5'-monophosphate phosphoribohydrolase LOG3	--	--	--	Possible lysine decarboxylase	Cytokinin riboside 5&apos;-monophosphate phosphoribohydrolase LOG3 OS=Arabidopsis thaliana OX=3702 GN=LOG3 PE=1 SV=1	PREDICTED: cytokinin riboside 5&apos;-monophosphate phosphoribohydrolase LOG3 [Cucumis sativus]
Cucumis_sativus_newGene_910	7.26261	5.77216	7.15227	1.64412	3.00352	5.90106	0.172006	0.377382	0.284192	-0.92644	down	-4.52878	down	-3.5936	down	--	--	--	--	--	--	--	--	--	--
Cucumis_sativus_newGene_93	84.04	4.99869	108.459	7.28816	2.90799	2.27044	3.98593	1.72567	5.16114	-3.92977	down	-4.21965	down	-0.279981	normal	--	--	--	--	--	--	--	--	--	hypothetical protein GLYMA_13G013900 [Glycine max]
Cucumis_sativus_newGene_94	1918.77	836.414	737.652	573.832	444.234	512.387	464.44	266.473	355.552	-1.19588	down	-1.76164	down	-0.560418	normal	--	--	--	--	--	--	--	--	--	hypothetical protein GLYMA_13G013900 [Glycine max]

## Sheet: DEG-II-IIIs
DEG-II-IIIs of wild type
	FPKM									log2FC	Regulated Direction	log2FC	Regulated Direction	log2FC	Regulated Direction	Database annotation
Gene_ID	StageII-1	StageII-2	StageII-3	StageIII-1	StageIII-2	StageIII-3	StageIV-1	StageIV-2	StageIV-3	StageIII vs StageII	StageIII vs StageII	StageIV vs StageII	StageIV vs StageII	StageIV vs StageIII	StageIV vs StageIII	COG_class	COG_class_annotation	GO_annotation	KEGG_annotation	KEGG_pathway_annotation	KOG_class	KOG_class_annotation	Pfam_annotation	Swiss_Prot_annotation	NR_annotation
Csa1G001450	26.6701	27.005	27.2932	20.9394	21.1984	22.8381	11.8624	13.6034	13.3727	-0.305565	normal	-1.11966	down	-0.806021	down	--	--	--	--	--	--	--	SBP domain	Squamosa promoter-binding-like protein 13B OS=Arabidopsis thaliana OX=3702 GN=SPL13B PE=3 SV=1	PREDICTED: squamosa promoter-binding-like protein 13A [Cucumis sativus]
Csa1G002130	95.4798	76.1316	92.408	51.1163	65.2851	69.206	25.1403	30.7818	52.2991	-0.498714	normal	-1.3512	down	-0.843372	down	[E]	Amino acid transport and metabolism	Molecular Function: argininosuccinate synthase activity (GO:0004055);; Molecular Function: ATP binding (GO:0005524);; Biological Process: arginine biosynthetic process (GO:0006526);; Biological Process: threonine catabolic process (GO:0006567);; Biological Process: nucleotide biosynthetic process (GO:0009165);; Cellular Component: chloroplast stroma (GO:0009570);;	K01940|0|csv:101215982|K01940 argininosuccinate synthase [EC:6.3.4.5] | (RefSeq) argininosuccinate synthase, chloroplastic	Arginine biosynthesis (ko00220);; Alanine, aspartate and glutamate metabolism (ko00250);; Biosynthesis of amino acids (ko01230)	[E]	Amino acid transport and metabolism	Arginosuccinate synthase	Argininosuccinate synthase, chloroplastic OS=Arabidopsis thaliana OX=3702 GN=At4g24830 PE=1 SV=3	hypothetical protein Csa_1G002130 [Cucumis sativus]
Csa1G005530	1.09686	0.909542	0.890021	0.701095	0.440407	0.70972	0.397353	0.275129	0.281098	-0.568444	normal	-1.59876	down	-1.02257	down	[T]	Signal transduction mechanisms	Molecular Function: voltage-gated potassium channel activity (GO:0005249);; Molecular Function: calmodulin binding (GO:0005516);; Cellular Component: plasma membrane (GO:0005886);; Biological Process: potassium ion transport (GO:0006813);; Cellular Component: integral component of membrane (GO:0016021);; Biological Process: cellular component organization (GO:0016043);; Molecular Function: cyclic…	K05391|0|csv:101209760|K05391 cyclic nucleotide gated channel, other eukaryote | (RefSeq) probable cyclic nucleotide-gated ion channel 16	Plant-pathogen interaction (ko04626)	[PT]	Inorganic ion transport and metabolism;; Signal transduction mechanisms	Ion transport protein;; Cyclic nucleotide-binding domain	Probable cyclic nucleotide-gated ion channel 16 OS=Arabidopsis thaliana OX=3702 GN=CNGC16 PE=2 SV=1	hypothetical protein Csa_1G005530 [Cucumis sativus]
Csa1G007830	62.7741	45.9107	52.0789	44.0996	43.4657	49.5493	23.9376	25.6994	25.3049	-0.221301	normal	-1.16371	down	-0.934918	down	--	--	--	--	--	--	--	HEAT repeat;; HEAT-like repeat;; HEAT repeats	TORTIFOLIA1-like protein 3 OS=Arabidopsis thaliana OX=3702 GN=TOR1L3 PE=2 SV=1	PREDICTED: microtubule-associated protein TORTIFOLIA1 [Cucumis sativus]
Csa1G015670	1.00475	1.22589	1.61183	1.20136	0.954724	1.13206	0.604718	0.56872	0.734516	-0.204897	normal	-1.07787	down	-0.86376	down	--	--	Biological Process: response to stress (GO:0006950);;	--	--	--	--	Universal stress protein family	--	hypothetical protein Csa_1G015670 [Cucumis sativus]
Csa1G024270	34.385	27.129	28.1262	24.8824	26.2073	29.4729	17.1241	20.2273	17.7066	-0.145115	normal	-0.763707	down	-0.611261	down	--	--	--	--	--	--	--	PB1 domain	--	PREDICTED: uncharacterized protein LOC101210340 [Cucumis sativus]
Csa1G025190	36.4289	30.0497	32.0629	31.0914	30.1038	34.4993	11.9112	11.4853	11.8572	-0.0304115	normal	-1.54177	down	-1.50341	down	--	--	Cellular Component: intracellular membrane-bounded organelle (GO:0043231);;	--	--	--	--	Domain of unknown function (DUF4228)	--	PREDICTED: uncharacterized protein LOC101203132 [Cucumis sativus]
Csa1G031750	73.7374	40.7676	46.5881	44.6155	41.3317	38.2347	23.0719	22.1651	18.6471	-0.435409	normal	-1.54968	down	-1.10728	down	--	--	Molecular Function: transcription regulatory region sequence-specific DNA binding (GO:0000976);; Molecular Function: transcription factor activity, sequence-specific DNA binding (GO:0003700);; Molecular Function: protein binding (GO:0005515);; Cellular Component: nucleus (GO:0005634);; Biological Process: regulation of transcription, DNA-templated (GO:0006355);; Biological Process: trichome branc…	K09338|0|csv:101215660|K09338 homeobox-leucine zipper protein | (RefSeq) homeobox-leucine zipper protein HDG11-like	--	--	--	START domain;; Homeobox domain	Homeobox-leucine zipper protein HDG11 OS=Arabidopsis thaliana OX=3702 GN=HDG11 PE=1 SV=1	PREDICTED: homeobox-leucine zipper protein HDG11-like isoform X1 [Cucumis sativus]
Csa1G038890	169.398	136.684	150.898	173.005	174.485	165.616	79.9937	122.326	91.0087	0.17786	normal	-0.698977	down	-0.869043	down	--	--	--	--	--	--	--	--	--	PREDICTED: uncharacterized protein LOC101220892 [Cucumis sativus]
Csa1G038930	24.4294	15.3612	22.6104	22.6652	19.7705	26.843	10.4404	12.472	17.2881	0.169688	normal	-0.686956	down	-0.848072	down	--	--	Cellular Component: extracellular region (GO:0005576);; Biological Process: lipoprotein metabolic process (GO:0042157);;	--	--	--	--	Protein of unknown function, DUF538	Uncharacterized protein At5g01610 OS=Arabidopsis thaliana OX=3702 GN=At5g01610 PE=1 SV=1	PREDICTED: uncharacterized protein At5g01610-like [Cucumis sativus]
Csa1G042150	2.4635	1.84013	2.00867	1.5689	1.70033	1.76281	0.870724	0.872355	0.974116	-0.312399	normal	-1.26618	down	-0.945544	down	--	--	Biological Process: response to molecule of fungal origin (GO:0002238);; Biological Process: response to stress (GO:0006950);;	--	--	--	--	Universal stress protein family	--	PREDICTED: uncharacterized protein LOC101206357 [Cucumis sativus]
Csa1G043020	11.7149	12.5897	10.9727	8.69143	9.82066	10.7567	6.44058	5.71511	7.79366	-0.255893	normal	-0.881252	down	-0.617363	down	--	--	Molecular Function: binding (GO:0005488);;	--	--	[R]	General function prediction only	--	Protein SHOOT GRAVITROPISM 5 OS=Arabidopsis thaliana OX=3702 GN=SGR5 PE=1 SV=1	PREDICTED: protein SHOOT GRAVITROPISM 5-like [Cucumis sativus]
Csa1G044840	3.07246	3.30291	3.2196	2.65525	3.005	2.37909	1.0279	1.78173	0.804768	-0.185397	normal	-1.44522	down	-1.25192	down	[Q]	Secondary metabolites biosynthesis, transport and catabolism	Molecular Function: oxidoreductase activity, acting on paired donors, with incorporation or reduction of molecular oxygen, 2-oxoglutarate as one donor, and incorporation of one atom each of oxygen into both donors (GO:0016706);; Molecular Function: dioxygenase activity (GO:0051213);;	--	--	[QR]	Secondary metabolites biosynthesis, transport and catabolism;; General function prediction only	2OG-Fe(II) oxygenase superfamily;; non-haem dioxygenase in morphine synthesis N-terminal	Probable 2-oxoglutarate-dependent dioxygenase AOP1.2 OS=Arabidopsis thaliana OX=3702 GN=AOP1.2 PE=2 SV=1	hypothetical protein Csa_1G044830 [Cucumis sativus]
Csa1G049960	135.773	103.07	123.813	142.719	126.185	108.681	78.347	62.5587	65.2733	0.0693738	normal	-0.876669	down	-0.938027	down	[G]	Carbohydrate transport and metabolism	Molecular Function: lyase activity (GO:0016829);; Molecular Function: pectate lyase activity (GO:0030570);;	K01728|0|csv:101209736|K01728 pectate lyase [EC:4.2.2.2] | (RefSeq) probable pectate lyase 5	Pentose and glucuronate interconversions (ko00040)	--	--	Pectate lyase	Probable pectate lyase 22 OS=Arabidopsis thaliana OX=3702 GN=At5g63180 PE=2 SV=1	PREDICTED: probable pectate lyase 5 [Cucumis sativus]
Csa1G050100	179.915	148.287	143.437	165.399	153.544	149.736	95.8959	104.121	75.8774	0.00130942	normal	-0.833057	down	-0.827252	down	[IR]	Lipid transport and metabolism;; General function prediction only	Molecular Function: carboxylic ester hydrolase activity (GO:0004091);; Cellular Component: extracellular region (GO:0005576);; Biological Process: lipid metabolic process (GO:0006629);; Cellular Component: cytoplasmic vesicle (GO:0016023);; Molecular Function: hydrolase activity, acting on ester bonds (GO:0016788);;	--	--	--	--	GDSL-like Lipase/Acylhydrolase	GDSL esterase/lipase At3g48460 OS=Arabidopsis thaliana OX=3702 GN=At3g48460 PE=2 SV=1	PREDICTED: GDSL esterase/lipase At3g48460 [Cucumis sativus]
Csa1G059180	16.3933	16.3587	17.4654	13.3069	16.06	16.5422	9.27376	10.3555	9.92479	-0.115691	normal	-0.821698	down	-0.697805	down	--	--	--	--	--	[R]	General function prediction only	Competence protein	Probable E3 ubiquitin-protein ligase XBOS33 OS=Oryza sativa subsp. japonica OX=39947 GN=XBOS33 PE=2 SV=1	hypothetical protein Csa_1G059180 [Cucumis sativus]
Csa1G059760	5.12827	10.5846	11.2585	6.32597	6.49338	5.90609	2.71692	2.87852	0	-0.499939	normal	-2.30306	down	-1.79726	down	--	--	Molecular Function: transferase activity, transferring phosphorus-containing groups (GO:0016772);;	--	--	[R]	General function prediction only	Ankyrin repeats (3 copies);; Ankyrin repeats (many copies);; Ankyrin repeats (many copies);; Ankyrin repeat;; Ankyrin repeat	--	hypothetical protein Csa_1G059760 [Cucumis sativus]
Csa1G064670	64.0326	62.6845	63.5678	47.9063	60.6979	55.7089	24.2318	32.5739	23.567	-0.198505	normal	-1.29929	down	-1.09287	down	--	--	Molecular Function: transcription factor activity, sequence-specific DNA binding (GO:0003700);; Cellular Component: nucleus (GO:0005634);; Cellular Component: cytoplasm (GO:0005737);; Biological Process: regulation of transcription, DNA-templated (GO:0006355);; Biological Process: protein acetylation (GO:0006473);; Biological Process: epidermal cell differentiation (GO:0009913);; Biological Proce…	K09338|0|csv:101212604|K09338 homeobox-leucine zipper protein | (RefSeq) homeobox-leucine zipper protein MERISTEM L1	--	--	--	START domain;; Homeobox domain	Homeobox-leucine zipper protein MERISTEM L1 OS=Arabidopsis thaliana OX=3702 GN=ATML1 PE=2 SV=1	PREDICTED: homeobox-leucine zipper protein MERISTEM L1 [Cucumis sativus]
Csa1G075590	1.30531	2.00549	1.61512	0.957629	1.08206	1.20165	0.710323	0.154657	0.540677	-0.571448	normal	-1.87536	down	-1.29641	down	--	--	Cellular Component: mitochondrion (GO:0005739);; Cellular Component: plastid (GO:0009536);;	--	--	[R]	General function prediction only	PPR repeat family;; PPR repeat;; PPR repeat;; Pentatricopeptide repeat domain;; Pentacotripeptide-repeat region of PRORP;; Tetratricopeptide repeat;; Mitochondrial ATPase expression	Pentatricopeptide repeat-containing protein At5g46100 OS=Arabidopsis thaliana OX=3702 GN=At5g46100 PE=2 SV=1	hypothetical protein Csa_1G075590 [Cucumis sativus]
Csa1G165730	95.3819	68.6085	86.8766	78.5955	77.8964	83.2772	37.1938	53.0338	44.1696	-0.0557231	normal	-0.961471	down	-0.897838	down	--	--	--	--	--	--	--	--	--	PREDICTED: uncharacterized protein LOC101207654 [Cucumis sativus]
Csa1G173170	0.980518	1.0932	1.13012	1.31031	1.36951	1.15243	0.771325	0.629472	0.311082	0.27774	normal	-0.95257	down	-1.22259	down	[P]	Inorganic ion transport and metabolism	Molecular Function: potassium channel activity (GO:0005267);; Molecular Function: calcium ion binding (GO:0005509);; Cellular Component: vacuolar membrane (GO:0005774);; Biological Process: regulation of seed germination (GO:0010029);; Biological Process: regulation of stomatal movement (GO:0010119);; Molecular Function: calcium-activated potassium channel activity (GO:0015269);; Cellular Compone…	K05389|0|csv:101214791|K05389 potassium channel subfamily K, other eukaryote | (RefSeq) two-pore potassium channel 1-like	--	[P]	Inorganic ion transport and metabolism	Ion channel;; Ion transport protein	Two-pore potassium channel 1 OS=Arabidopsis thaliana OX=3702 GN=TPK1 PE=1 SV=2	PREDICTED: two-pore potassium channel 1-like [Cucumis sativus]
Csa1G231530	24.4863	17.3374	20.2539	17.957	14.6175	19.132	7.16445	11.1753	8.65941	-0.252501	normal	-1.25171	down	-0.991563	down	--	--	Biological Process: cellular process (GO:0009987);;	K14484|4.69544e-128|csv:101203761|K14484 auxin-responsive protein IAA | (RefSeq) auxin-responsive protein IAA29-like	Plant hormone signal transduction (ko04075)	--	--	AUX/IAA family	Auxin-responsive protein IAA12 OS=Arabidopsis thaliana OX=3702 GN=IAA12 PE=1 SV=1	hypothetical protein Csa_1G231530 [Cucumis sativus]
Csa1G248110	5.04927	1.9426	4.4466	2.59721	1.64571	3.09853	1.55006	1.14257	1.53916	-0.635392	normal	-1.49505	down	-0.852151	down	[G]	Carbohydrate transport and metabolism	Biological Process: carbohydrate transport (GO:0008643);; Molecular Function: carbohydrate transmembrane transporter activity (GO:0015144);; Cellular Component: integral component of membrane (GO:0016021);; Biological Process: carboxylic acid metabolic process (GO:0019752);; Molecular Function: substrate-specific transmembrane transporter activity (GO:0022891);; Molecular Function: 2-alkenal redu…	--	--	[R]	General function prediction only	Sugar (and other) transporter;; Major Facilitator Superfamily	Probable polyol transporter 6 OS=Arabidopsis thaliana OX=3702 GN=PLT6 PE=2 SV=2	PREDICTED: probable polyol transporter 6 [Cucumis sativus]
Csa1G264010	78.1544	62.6843	70.1266	52.3077	54.6552	59.6825	24.9515	29.2568	26.5012	-0.330199	normal	-1.44642	down	-1.10853	down	--	--	--	--	--	--	--	--	--	PREDICTED: uncharacterized protein LOC101205285 [Cucumis sativus]
Csa1G423280	10.4107	8.0562	7.26908	5.69368	5.23749	6.67629	4.17724	2.9429	2.62114	-0.551539	normal	-1.46503	down	-0.906632	down	--	--	--	--	--	--	--	--	--	PREDICTED: uncharacterized protein LOC101222016 [Cucumis sativus]
Csa1G425940	8.55886	12.1012	8.57616	7.43332	10.7381	9.04276	4.5988	4.51505	7.16519	-0.062821	normal	-0.839424	down	-0.768001	down	--	--	Molecular Function: DNA binding (GO:0003677);; Molecular Function: transcription factor activity, sequence-specific DNA binding (GO:0003700);; Cellular Component: nucleus (GO:0005634);; Biological Process: regulation of transcription, DNA-templated (GO:0006355);; Biological Process: jasmonic acid metabolic process (GO:0009694);; Biological Process: response to jasmonic acid (GO:0009753);; Molecul…	--	--	--	--	Helix-loop-helix DNA-binding domain	Transcription factor bHLH35 OS=Arabidopsis thaliana OX=3702 GN=BHLH35 PE=2 SV=1	PREDICTED: transcription factor bHLH35-like [Cucumis sativus]
Csa1G427480	1.92713	2.37658	1.80208	1.17885	1.60375	1.78434	0.375931	0.660282	0.716561	-0.400897	normal	-1.85608	down	-1.44745	down	--	--	Cellular Component: lytic vacuole (GO:0000323);; Biological Process: regulation of cell size (GO:0008361);; Biological Process: response to blue light (GO:0009637);; Biological Process: photomorphogenesis (GO:0009640);; Molecular Function: auxin:proton symporter activity (GO:0009672);; Biological Process: response to ethylene (GO:0009723);; Biological Process: response to glucose (GO:0009749);; C…	K13947|0|csv:101204628|K13947 auxin efflux carrier family | (RefSeq) CSPIN5; auxin efflux carrier component 2-like	--	--	--	Membrane transport protein	Auxin efflux carrier component 2 OS=Arabidopsis thaliana OX=3702 GN=PIN2 PE=1 SV=2	PREDICTED: auxin efflux carrier component 2-like isoform X1 [Cucumis sativus]
Csa1G467120	5.96475	4.247	4.89307	3.69504	6.77229	2.91685	2.80241	2.40593	3.08469	-0.118452	normal	-0.808569	down	-0.681723	down	[T]	Signal transduction mechanisms	Molecular Function: protein serine/threonine kinase activity (GO:0004674);; Molecular Function: protein serine/threonine/tyrosine kinase activity (GO:0004712);; Molecular Function: non-membrane spanning protein tyrosine kinase activity (GO:0004715);; Molecular Function: ATP binding (GO:0005524);; Cellular Component: nucleus (GO:0005634);; Cellular Component: cytosol (GO:0005829);; Cellular Compon…	--	--	[T]	Signal transduction mechanisms	Protein tyrosine kinase;; Protein kinase domain;; Ankyrin repeats (3 copies);; Ankyrin repeat;; Ankyrin repeat;; Ankyrin repeats (many copies);; Ankyrin repeats (many copies)	Integrin-linked protein kinase 1 OS=Arabidopsis thaliana OX=3702 GN=ILK1 PE=1 SV=1	PREDICTED: serine/threonine-protein kinase HT1 [Cucumis sativus]
Csa1G467180	2.04255	0.00997	12.7481	12.0752	16.6998	13.2019	0.985727	1.54073	0.25814	1.528	normal	-2.42984	down	-3.94233	down	--	--	--	--	--	--	--	--	--	hypothetical protein Csa_1G467180 [Cucumis sativus]
Csa1G522540	561.465	481.483	636.72	611.803	594.604	622.368	336.56	375.785	394	0.135199	normal	-0.661844	down	-0.788415	down	--	--	Cellular Component: extracellular region (GO:0005576);; Biological Process: syncytium formation (GO:0006949);; Cellular Component: plant-type cell wall (GO:0009505);; Biological Process: plant-type cell wall organization (GO:0009664);; Cellular Component: membrane (GO:0016020);;	--	--	--	--	Pollen allergen;; Lytic transglycolase	Expansin-A4 OS=Arabidopsis thaliana OX=3702 GN=EXPA4 PE=1 SV=1	hypothetical protein Csa_1G522540 [Cucumis sativus]
Csa1G523640	1.38295	1.84627	1.0037	1.84518	3.33502	0.927445	0.640308	0.721187	0.757084	0.553376	normal	-1.06481	down	-1.60845	down	[H]	Coenzyme transport and metabolism	Molecular Function: hydrolase activity (GO:0016787);;	K07025|6.13701e-178|csv:101222528|K07025 putative hydrolase of the HAD superfamily | (RefSeq) suppressor of disruption of TFIIS	--	[R]	General function prediction only	Haloacid dehalogenase-like hydrolase;; HAD-hyrolase-like	--	PREDICTED: suppressor of disruption of TFIIS [Cucumis sativus]
Csa1G527870	33.604	32.0089	15.4259	33.9002	39.7746	19.1446	27.3727	8.88424	5.18834	0.206782	normal	-1.02582	down	-1.2267	down	[O]	Posttranslational modification, protein turnover, chaperones	Cellular Component: cytoplasm (GO:0005737);; Biological Process: response to stress (GO:0006950);;	K13993|9.35786e-79|csv:101204421|K13993 HSP20 family protein | (RefSeq) 18.5 kDa class I heat shock protein-like	Protein processing in endoplasmic reticulum (ko04141)	[O]	Posttranslational modification, protein turnover, chaperones	Hsp20/alpha crystallin family	17.6 kDa class I heat shock protein 2 OS=Arabidopsis thaliana OX=3702 GN=HSP17.6B PE=2 SV=1	PREDICTED: 18.5 kDa class I heat shock protein-like [Cucumis sativus]
Csa1G527930	67.5631	67.8735	62.4618	49.2701	57.8226	55.6011	32.3832	42.0382	37.3435	-0.269499	normal	-0.881573	down	-0.604178	down	--	--	Cellular Component: vacuolar membrane (GO:0005774);; Cellular Component: plasmodesma (GO:0009506);; Molecular Function: ceramidase activity (GO:0017040);;	K12349|0|csv:101209656|K12349 neutral ceramidase [EC:3.5.1.23] | (RefSeq) neutral ceramidase-like	Sphingolipid metabolism (ko00600)	[T]	Signal transduction mechanisms	Neutral/alkaline non-lysosomal ceramidase, N-terminal;; Neutral/alkaline non-lysosomal ceramidase, C-terminal	Neutral ceramidase 1 OS=Arabidopsis thaliana OX=3702 GN=NCER1 PE=2 SV=1	PREDICTED: neutral ceramidase-like [Cucumis sativus]
Csa1G531170	4.17357	1.92882	3.47715	3.05117	2.02992	2.83734	1.34584	1.27543	1.15832	-0.270587	normal	-1.28308	down	-1.00492	down	--	--	--	--	--	[R]	General function prediction only	Glycosyl transferase family 90	--	PREDICTED: O-glucosyltransferase rumi homolog [Cucumis sativus]
Csa1G532210	166.738	150.251	147.171	155.516	154.264	157.638	95.5877	118.601	90.2776	0.0218734	normal	-0.666506	down	-0.680938	down	[I]	Lipid transport and metabolism	Biological Process: lipid metabolic process (GO:0006629);; Biological Process: fatty acid biosynthetic process (GO:0006633);; Biological Process: response to cold (GO:0009409);; Cellular Component: chloroplast envelope (GO:0009941);; Molecular Function: oxidoreductase activity, acting on paired donors, with oxidation of a pair of donors resulting in the reduction of molecular oxygen to two molecu…	K10257|0|csv:101209295|K10257 acyl-lipid omega-3 desaturase [EC:1.14.19.25 1.14.19.35 1.14.19.36] | (RefSeq) omega-3 fatty acid desaturase, endoplasmic reticulum	--	--	--	Fatty acid desaturase;; Domain of unknown function (DUF3474)	Omega-3 fatty acid desaturase, endoplasmic reticulum OS=Nicotiana tabacum OX=4097 GN=FAD3 PE=2 SV=1	PREDICTED: omega-3 fatty acid desaturase, endoplasmic reticulum [Cucumis sativus]
Csa1G532360	17.4672	12.369	17.9308	13.939	15.0368	15.8791	9.02011	8.7402	10.6602	-0.0837206	normal	-0.813087	down	-0.720593	down	--	--	Cellular Component: chloroplast envelope (GO:0009941);;	--	--	--	--	--	Protein CHUP1, chloroplastic OS=Arabidopsis thaliana OX=3702 GN=CHUP1 PE=1 SV=1	PREDICTED: protein CHUP1, chloroplastic isoform X1 [Cucumis sativus]
Csa1G533610	6.30408	3.32938	4.0405	3.16416	3.20258	4.88625	0.808962	1.33719	1.09597	-0.252446	normal	-2.21003	down	-1.95098	down	--	--	Cellular Component: extracellular region (GO:0005576);; Biological Process: negative regulation of stomatal complex development (GO:2000122);;	--	--	--	--	Epidermal patterning factor proteins	EPIDERMAL PATTERNING FACTOR-like protein 6 OS=Arabidopsis thaliana OX=3702 GN=EPFL6 PE=1 SV=1	PREDICTED: EPIDERMAL PATTERNING FACTOR-like protein 6 [Cucumis sativus]
Csa1G540350	44.4108	33.2875	36.4275	33.5218	33.4384	37.5891	11.8014	14.9079	10.0756	-0.11687	normal	-1.69241	down	-1.56804	down	[C]	Energy production and conversion	Molecular Function: oxidoreductase activity, acting on CH-OH group of donors (GO:0016614);;	--	--	--	--	Berberine and berberine like	Cannabidiolic acid synthase OS=Cannabis sativa OX=3483 GN=CBDAS PE=1 SV=1	hypothetical protein Csa_1G540350 [Cucumis sativus]
Csa1G568500	4.3889	3.36896	1.81285	3.53561	1.21086	3.25126	0.196909	0.325415	0.42467	-0.281516	normal	-3.41668	down	-3.13018	down	--	--	--	--	--	--	--	Phloem protein 2	F-box protein VBF OS=Arabidopsis thaliana OX=3702 GN=VBF PE=1 SV=1	hypothetical protein Csa_1G568500 [Cucumis sativus]
Csa1G575100	106.508	67.6253	102.749	87.4675	83.8558	108.241	53.5487	52.8095	62.2912	0.0212841	normal	-0.779733	down	-0.793	down	--	--	--	--	--	--	--	No apical meristem (NAM) protein	NAC domain-containing protein 75 OS=Arabidopsis thaliana OX=3702 GN=NAC075 PE=2 SV=1	PREDICTED: uncharacterized protein LOC101216381 isoform X2 [Cucumis sativus]
Csa1G588560	1.74022	2.37582	2.78316	2.16916	2.48428	2.10246	0.32456	0.657192	1.06771	0.0132233	normal	-1.81353	down	-1.81724	down	[C]	Energy production and conversion	Molecular Function: binding (GO:0005488);; Biological Process: metabolic process (GO:0008152);; Molecular Function: oxidoreductase activity, acting on CH-OH group of donors (GO:0016614);; Cellular Component: intracellular membrane-bounded organelle (GO:0043231);; Cellular Component: cytoplasmic part (GO:0044444);;	K00279|0|csv:101222481|K00279 cytokinin dehydrogenase [EC:1.5.99.12] | (RefSeq) cytokinin dehydrogenase 3	Zeatin biosynthesis (ko00908)	[C]	Energy production and conversion	Cytokinin dehydrogenase 1, FAD and cytokinin binding;; FAD binding domain	Cytokinin dehydrogenase 3 OS=Arabidopsis thaliana OX=3702 GN=CKX3 PE=1 SV=1	PREDICTED: cytokinin dehydrogenase 3 [Cucumis sativus]
Csa1G597050	9.58858	6.25121	7.96704	5.67761	5.3502	6.9105	4.56004	5.5674	3.51183	-0.372095	normal	-0.998875	down	-0.61871	down	--	--	Molecular Function: signal transducer activity (GO:0004871);; Cellular Component: heterotrimeric G-protein complex (GO:0005834);; Biological Process: G-protein coupled receptor signaling pathway (GO:0007186);; Biological Process: response to abscisic acid (GO:0009737);; Cellular Component: intracellular organelle (GO:0043229);;	--	--	--	--	GGL domain	Guanine nucleotide-binding protein subunit gamma 3 OS=Arabidopsis thaliana OX=3702 GN=GG3 PE=2 SV=1	PREDICTED: guanine nucleotide-binding protein subunit gamma 3-like [Cucumis sativus]
Csa1G599470	5.39229	4.71041	4.45191	3.7445	3.89779	4.33534	3.13299	2.48067	1.9896	-0.140873	normal	-0.998296	down	-0.849892	down	--	--	Molecular Function: binding (GO:0005488);; Cellular Component: nucleus (GO:0005634);; Cellular Component: cytoplasm (GO:0005737);;	--	--	[J]	Translation, ribosomal structure and biogenesis	Pumilio-family RNA binding repeat	Pumilio homolog 12 OS=Arabidopsis thaliana OX=3702 GN=APUM12 PE=2 SV=2	PREDICTED: pumilio homolog 12-like [Cucumis sativus]
Csa1G602530	145.964	119.598	120.562	96.2652	110.604	114.184	26.2233	39.5449	28.2394	-0.255811	normal	-2.09728	down	-1.83415	down	[DPM]	Cell cycle control, cell division, chromosome partitioning;; Inorganic ion transport and metabolism;; Cell wall/membrane/envelope biogenesis	Molecular Function: copper ion binding (GO:0005507);; Cellular Component: extracellular region (GO:0005576);; Cellular Component: cell wall (GO:0005618);; Molecular Function: L-ascorbate oxidase activity (GO:0008447);; Cellular Component: cytoplasmic vesicle (GO:0016023);; Biological Process: oxidation-reduction process (GO:0055114);;	K00423|0|csv:101217209|K00423 L-ascorbate oxidase [EC:1.10.3.3] | (RefSeq) L-ascorbate oxidase-like	Ascorbate and aldarate metabolism (ko00053)	[Q]	Secondary metabolites biosynthesis, transport and catabolism	Multicopper oxidase;; Multicopper oxidase;; Multicopper oxidase	L-ascorbate oxidase OS=Cucumis sativus OX=3659 PE=1 SV=1	hypothetical protein Csa_1G602530 [Cucumis sativus]
Csa1G611290	153.876	188.582	226.86	83.7883	155.685	147.146	24.0712	21.9341	32.9303	-0.540991	normal	-2.90624	down	-2.35535	down	[G]	Carbohydrate transport and metabolism	Biological Process: metabolic process (GO:0008152);; Molecular Function: hydrolase activity, acting on glycosyl bonds (GO:0016798);;	K01188|0|csv:101213230|K01188 beta-glucosidase [EC:3.2.1.21] | (RefSeq) cyanogenic beta-glucosidase-like	Cyanoamino acid metabolism (ko00460);; Starch and sucrose metabolism (ko00500);; Phenylpropanoid biosynthesis (ko00940)	[G]	Carbohydrate transport and metabolism	Glycosyl hydrolase family 1	Beta-glucosidase 24 OS=Oryza sativa subsp. japonica OX=39947 GN=BGLU24 PE=2 SV=1	PREDICTED: cyanogenic beta-glucosidase-like [Cucumis sativus]
Csa1G615710	32.2919	22.0986	27.7903	22.9782	23.4801	24.0877	9.33249	12.2132	9.9071	-0.191554	normal	-1.41714	down	-1.21786	down	[M]	Cell wall/membrane/envelope biogenesis	--	--	--	--	--	PQQ-like domain	--	PREDICTED: uncharacterized protein LOC101214470 isoform X2 [Cucumis sativus]
Csa1G627480	20.6809	15.9031	15.3314	12.3569	12.5671	14.6145	3.41997	3.86797	3.88332	-0.383408	normal	-2.27434	down	-1.88336	down	--	--	--	--	--	--	--	Domain of unknown function (DUF4228)	--	PREDICTED: uncharacterized protein LOC101216872 [Cucumis sativus]
Csa1G629050	2.42815	2.75392	3.15705	1.71724	1.67567	1.80504	0.831051	0.724956	1.23687	-0.662762	normal	-1.63226	down	-0.960227	down	[M]	Cell wall/membrane/envelope biogenesis	Cellular Component: plasma membrane (GO:0005886);; Biological Process: metabolic process (GO:0008152);; Molecular Function: hydrolase activity, acting on ester bonds (GO:0016788);;	K01114|0|csv:101218054|K01114 phospholipase C [EC:3.1.4.3] | (RefSeq) non-specific phospholipase C2	Inositol phosphate metabolism (ko00562);; Glycerophospholipid metabolism (ko00564);; Ether lipid metabolism (ko00565)	--	--	Phosphoesterase family	Non-specific phospholipase C2 OS=Arabidopsis thaliana OX=3702 GN=NPC2 PE=2 SV=1	PREDICTED: non-specific phospholipase C2 [Cucumis sativus]
Csa1G630850	2.07152	3.28299	3.09137	1.70612	2.74239	2.59505	0.1387	0.744946	0.564238	-0.244082	normal	-2.57304	down	-2.32127	down	--	--	--	--	--	[R]	General function prediction only	Aluminium activated malate transporter;; Fusaric acid resistance protein-like	Aluminum-activated malate transporter 2 OS=Arabidopsis thaliana OX=3702 GN=ALMT2 PE=2 SV=2	PREDICTED: aluminum-activated malate transporter 2-like [Cucumis sativus]
Csa1G655920	3.45627	2.97038	3.69826	3.64002	3.04398	3.9953	2.29373	1.87964	1.79197	0.0897915	normal	-0.815329	down	-0.897183	down	[H]	Coenzyme transport and metabolism	Biological Process: inactivation of MAPK activity (GO:0000188);; Molecular Function: phosphorylase activity (GO:0004645);; Molecular Function: protein binding (GO:0005515);; Cellular Component: nucleus (GO:0005634);; Cellular Component: cytosol (GO:0005829);; Biological Process: protein dephosphorylation (GO:0006470);; Biological Process: synapsis (GO:0007129);; Molecular Function: protein tyrosi…	K11752|0|csv:101205892|K11752 diaminohydroxyphosphoribosylaminopyrimidine deaminase / 5-amino-6-(5-phosphoribosylamino)uracil reductase [EC:3.5.4.26 1.1.1.193] | (RefSeq) riboflavin biosynthesis protein PYRR, chloroplastic-like	Riboflavin metabolism (ko00740)	[F]	Nucleotide transport and metabolism	RibD C-terminal domain;; Domain of unknown function (DUF1768)	Riboflavin biosynthesis protein PYRR, chloroplastic OS=Zea mays OX=4577 GN=PYRR PE=1 SV=1	PREDICTED: riboflavin biosynthesis protein PYRR, chloroplastic-like [Cucumis sativus]
Csa1G657480	2.92167	2.84336	2.54838	2.31047	2.51615	2.58342	1.71932	1.82305	1.44041	-0.165208	normal	-0.851514	down	-0.678849	down	--	--	Molecular Function: DNA binding (GO:0003677);;	K18835|0|csv:101206605|K18835 WRKY transcription factor 2 | (RefSeq) probable WRKY transcription factor 2	Plant-pathogen interaction (ko04626)	--	--	WRKY DNA -binding domain	WRKY transcription factor SUSIBA2 OS=Hordeum vulgare OX=4513 GN=WRKY46 PE=1 SV=1	PREDICTED: probable WRKY transcription factor 2 [Cucumis sativus]
Csa1G662790	140.847	101.804	100.413	87.4149	73.3925	85.9399	44.7148	50.2835	46.8893	-0.467784	normal	-1.33695	down	-0.862273	down	--	--	Cellular Component: extracellular region (GO:0005576);; Molecular Function: manganese ion binding (GO:0030145);; Molecular Function: nutrient reservoir activity (GO:0045735);; Molecular Function: oxalate oxidase activity (GO:0050162);; Biological Process: oxidation-reduction process (GO:0055114);;	--	--	--	--	Cupin;; Cupin domain	Germin-like protein subfamily 1 member 17 OS=Arabidopsis thaliana OX=3702 GN=At5g39150 PE=2 SV=1	PREDICTED: germin-like protein subfamily 1 member 17 [Cucumis sativus]
Csa1G695390	33.391	24.9224	33.666	25.5731	29.0657	34.7134	15.5999	18.3885	17.1242	-0.0282872	normal	-0.909162	down	-0.872886	down	[T]	Signal transduction mechanisms	Molecular Function: protein serine/threonine kinase activity (GO:0004674);; Molecular Function: ATP binding (GO:0005524);; Biological Process: protein phosphorylation (GO:0006468);; Biological Process: circadian rhythm (GO:0007623);; Cellular Component: membrane (GO:0016020);;	K08867|0|csv:101222641|K08867 WNK lysine deficient protein kinase [EC:2.7.11.1] | (RefSeq) probable serine/threonine-protein kinase WNK9	--	[R]	General function prediction only	Protein kinase domain;; Protein tyrosine kinase;; Oxidative-stress-responsive kinase 1 C-terminal domain	Serine/threonine-protein kinase WNK1 OS=Arabidopsis thaliana OX=3702 GN=WNK1 PE=1 SV=1	PREDICTED: probable serine/threonine-protein kinase WNK9 [Cucumis sativus]
Csa1G696470	17.6667	20.7006	23.8595	11.3131	14.9775	15.2286	6.69114	6.59978	7.28966	-0.564815	normal	-1.64569	down	-1.07218	down	[R]	General function prediction only	Molecular Function: GTPase activity (GO:0003924);; Molecular Function: sphingomyelin phosphodiesterase activity (GO:0004767);; Molecular Function: GTP binding (GO:0005525);; Cellular Component: extracellular region (GO:0005576);; Cellular Component: intracellular (GO:0005622);; Cellular Component: plasma membrane (GO:0005886);; Biological Process: obsolete GTP catabolic process (GO:0006184);; Bio…	K04392|6.92741e-143|csv:101208639|K04392 Ras-related C3 botulinum toxin substrate 1 | (RefSeq) rac-like GTP-binding protein ARAC7	Phagosome (ko04145);; AGE-RAGE signaling pathway in diabetic complications (ko04933)	[R]	General function prediction only	Ras family;; Ras of Complex, Roc, domain of DAPkinase	Rac-like GTP-binding protein ARAC7 OS=Arabidopsis thaliana OX=3702 GN=ARAC7 PE=1 SV=1	hypothetical protein Csa_1G696470 [Cucumis sativus]
Csa1G701280	50.8636	45.3134	55.1218	48.6498	54.1488	57.2689	36.1694	35.7307	32.1675	0.0939757	normal	-0.597846	down	-0.683693	down	[T]	Signal transduction mechanisms	Molecular Function: G-protein coupled receptor kinase activity (GO:0004703);; Molecular Function: protein tyrosine kinase activity (GO:0004713);; Molecular Function: ATP binding (GO:0005524);; Cellular Component: extracellular region (GO:0005576);; Cellular Component: plasma membrane (GO:0005886);; Biological Process: protein phosphorylation (GO:0006468);; Biological Process: response to nematode…	--	--	--	--	Protein tyrosine kinase;; Protein kinase domain;; Leucine rich repeat;; Leucine rich repeat N-terminal domain;; Leucine Rich repeats (2 copies);; Leucine Rich repeat;; Leucine Rich Repeat	Protein STRUBBELIG-RECEPTOR FAMILY 8 OS=Arabidopsis thaliana OX=3702 GN=SRF8 PE=2 SV=1	PREDICTED: protein STRUBBELIG-RECEPTOR FAMILY 8 isoform X1 [Cucumis sativus]
Csa2G000440	0.716388	1.46383	0.576648	0.914623	2.20349	1.46566	0.374124	0.761492	0.409866	0.815605	normal	-1.01186	down	-1.81896	down	[C]	Energy production and conversion	Molecular Function: binding (GO:0005488);; Biological Process: metabolic process (GO:0008152);; Molecular Function: oxidoreductase activity, acting on CH-OH group of donors (GO:0016614);; Cellular Component: intracellular membrane-bounded organelle (GO:0043231);; Cellular Component: cytoplasmic part (GO:0044444);;	K00279|0|csv:105434535|K00279 cytokinin dehydrogenase [EC:1.5.99.12] | (RefSeq) cytokinin dehydrogenase 3-like	Zeatin biosynthesis (ko00908)	[C]	Energy production and conversion	Cytokinin dehydrogenase 1, FAD and cytokinin binding;; FAD binding domain	Cytokinin dehydrogenase 3 OS=Arabidopsis thaliana OX=3702 GN=CKX3 PE=1 SV=1	hypothetical protein Csa_2G000440 [Cucumis sativus]
Csa2G000520	5.12257	2.68397	5.55462	4.1464	3.7345	5.32646	1.78718	2.04913	2.9655	-0.00835959	normal	-1.03353	down	-1.0162	down	[Q]	Secondary metabolites biosynthesis, transport and catabolism	Molecular Function: aconitate hydratase activity (GO:0003994);; Molecular Function: copper ion binding (GO:0005507);; Cellular Component: mitochondrion (GO:0005739);; Cellular Component: vacuole (GO:0005773);; Cellular Component: cytosol (GO:0005829);; Cellular Component: plasma membrane (GO:0005886);; Biological Process: glycolytic process (GO:0006096);; Biological Process: citrate metabolic pro…	K05933|0|csv:101203726|K05933 aminocyclopropanecarboxylate oxidase [EC:1.14.17.4] | (RefSeq) 1-aminocyclopropane-1-carboxylate oxidase 1	Cysteine and methionine metabolism (ko00270)	[QR]	Secondary metabolites biosynthesis, transport and catabolism;; General function prediction only	2OG-Fe(II) oxygenase superfamily;; non-haem dioxygenase in morphine synthesis N-terminal	1-aminocyclopropane-1-carboxylate oxidase 1 OS=Arabidopsis thaliana OX=3702 GN=ACO1 PE=2 SV=1	PREDICTED: 1-aminocyclopropane-1-carboxylate oxidase 1 [Cucumis sativus]
Csa2G004740	0.334634	0.293921	0.490961	0.258213	0.201132	0.269554	0.039551	0.140277	0.174705	-0.596891	normal	-1.68753	down	-1.08	down	[R]	General function prediction only	Molecular Function: serine-type endopeptidase activity (GO:0004252);; Molecular Function: ARF guanyl-nucleotide exchange factor activity (GO:0005086);; Cellular Component: intracellular (GO:0005622);; Cellular Component: cytoplasm (GO:0005737);; Biological Process: proteolysis (GO:0006508);; Biological Process: plant-type cell wall modification (GO:0009827);; Biological Process: pollen germinatio…	K18443|0|csv:101210509|K18443 golgi-specific brefeldin A-resistance guanine nucleotide exchange factor 1 | (RefSeq) ARF guanine-nucleotide exchange factor GNL2	Endocytosis (ko04144)	[U]	Intracellular trafficking, secretion, and vesicular transport	Sec7 domain;; Guanine nucleotide exchange factor in Golgi transport N-terminal;; Dimerisation and cyclophilin-binding domain of Mon2	ARF guanine-nucleotide exchange factor GNL2 OS=Arabidopsis thaliana OX=3702 GN=GNL2 PE=2 SV=1	PREDICTED: ARF guanine-nucleotide exchange factor GNL2 [Cucumis sativus]
Csa2G005890	124.899	103.967	112.303	96.86	111.434	121.436	63.4732	75.6064	56.6443	-0.0406907	normal	-0.864456	down	-0.816175	down	[T]	Signal transduction mechanisms	Molecular Function: ATP binding (GO:0005524);; Cellular Component: plasma membrane (GO:0005886);; Biological Process: obsolete ATP catabolic process (GO:0006200);; Biological Process: drug transmembrane transport (GO:0006855);; Molecular Function: ATPase-coupled organic phosphonate transmembrane transporter activity (GO:0015416);; Biological Process: cuticle development (GO:0042335);; Molecular F…	--	--	[Q]	Secondary metabolites biosynthesis, transport and catabolism	ABC-2 type transporter;; ABC transporter;; Plant PDR ABC transporter associated;; ABC-transporter extracellular N-terminal;; AAA domain, putative AbiEii toxin, Type IV TA system;; ATPase family associated with various cellular activities (AAA)	ABC transporter G family member 32 OS=Arabidopsis thaliana OX=3702 GN=ABCG32 PE=1 SV=1	PREDICTED: ABC transporter G family member 32 [Cucumis sativus]
Csa2G006190	25.3553	25.229	21.1266	23.6717	21.8544	22.2172	15.3735	14.7431	12.998	-0.0559561	normal	-0.783215	down	-0.719991	down	--	--	Molecular Function: acetylglucosaminyltransferase activity (GO:0008375);; Cellular Component: membrane (GO:0016020);;	K20891|0|csv:101221760|K20891 beta-glucuronosyltransferase [EC:2.4.1.-] | (RefSeq) xylosyltransferase 1	--	[G]	Carbohydrate transport and metabolism	Core-2/I-Branching enzyme	Beta-glucuronosyltransferase GlcAT14B OS=Arabidopsis thaliana OX=3702 GN=GLCAT14B PE=2 SV=1	PREDICTED: xylosyltransferase 1 [Cucumis sativus]
Csa2G006270	204.172	144.353	210.877	173.107	165.764	213.336	79.8767	105.235	88.5584	-0.00939129	normal	-1.09221	down	-1.07495	down	--	--	Molecular Function: transcription factor activity, sequence-specific DNA binding (GO:0003700);; Cellular Component: nucleus (GO:0005634);; Biological Process: regulation of transcription, DNA-templated (GO:0006355);; Biological Process: macromolecule biosynthetic process (GO:0009059);; Biological Process: response to water deprivation (GO:0009414);; Biological Process: ethylene-activated signalin…	--	--	--	--	AP2 domain	Ethylene-responsive transcription factor WIN1 OS=Arabidopsis thaliana OX=3702 GN=WIN1 PE=2 SV=1	PREDICTED: ethylene-responsive transcription factor WIN1-like [Cucumis sativus]
Csa2G006280	22.9014	19.9467	20.7483	23.2776	18.3785	20.0957	13.3148	12.8141	11.0833	-0.0266134	normal	-0.840985	down	-0.806518	down	--	--	--	--	--	--	--	--	--	hypothetical protein Csa_2G006280 [Cucumis sativus]
Csa2G009330	25.0354	20.236	20.5714	17.5978	15.7011	19.06	3.22737	5.01886	3.96433	-0.320708	normal	-2.48655	down	-2.15809	down	--	--	Biological Process: membrane fusion (GO:0006944);; Biological Process: Golgi vesicle transport (GO:0048193);;	--	--	--	--	--	--	PREDICTED: uncharacterized protein LOC101211332 [Cucumis sativus]
Csa2G009350	3.15334	2.05004	2.1473	3.55139	2.58115	2.59417	1.08635	1.0276	1.36585	0.260516	normal	-1.13227	down	-1.38454	down	--	--	Biological Process: reproduction (GO:0000003);; Biological Process: cellular process (GO:0009987);;	--	--	--	--	--	--	PREDICTED: NEDD8-specific protease 1 [Cucumis sativus]
Csa2G013290	45.4854	39.1109	36.082	31.4303	35.6697	39.2379	21.0017	20.7815	18.5772	-0.172419	normal	-1.0582	down	-0.878515	down	[IQ]	Lipid transport and metabolism;; Secondary metabolites biosynthesis, transport and catabolism	Biological Process: fatty acid biosynthetic process (GO:0006633);; Cellular Component: plastid (GO:0009536);;	--	--	[CIQ]	Energy production and conversion;; Lipid transport and metabolism;; Secondary metabolites biosynthesis, transport and catabolism	Phosphopantetheine attachment site	Acyl carrier protein 1, chloroplastic OS=Casuarina glauca OX=3522 GN=ACP1 PE=2 SV=1	PREDICTED: acyl carrier protein 1, chloroplastic [Cucumis sativus]
Csa2G023900	4.20991	7.12352	5.51007	3.09865	5.33331	4.92046	1.82186	2.48223	0.638194	-0.311562	normal	-1.78976	down	-1.47288	down	--	--	Molecular Function: iron ion binding (GO:0005506);; Biological Process: response to wounding (GO:0009611);; Biological Process: response to abscisic acid (GO:0009737);; Biological Process: response to jasmonic acid (GO:0009753);; Biological Process: defense response to bacterium, incompatible interaction (GO:0009816);; Molecular Function: linoleate 13S-lipoxygenase activity (GO:0016165);; Biologi…	K15718|1.10987e-76|csv:101207163|K15718 linoleate 9S-lipoxygenase [EC:1.13.11.58] | (RefSeq) linoleate 9S-lipoxygenase 6	Linoleic acid metabolism (ko00591)	--	--	Lipoxygenase	Probable linoleate 9S-lipoxygenase 5 OS=Solanum tuberosum OX=4113 GN=LOX1.5 PE=2 SV=1	Lipoxygenase [Cucumis sativus]
Csa2G033880	7.49926	9.65788	14.9219	8.89383	9.81314	9.30665	0.806415	2.71461	2.43708	0.110234	normal	-2.64215	down	-2.74372	down	--	--	Cellular Component: nucleus (GO:0005634);;	--	--	--	--	Protein of unknown function (DUF1645)	--	hypothetical protein Csa_2G033880 [Cucumis sativus]
Csa2G048330	10.4571	7.99159	18.3921	9.91002	9.376	14.1269	6.35992	5.68626	6.40924	-0.126475	normal	-1.05427	down	-0.918229	down	[IQ]	Lipid transport and metabolism;; Secondary metabolites biosynthesis, transport and catabolism	Molecular Function: acetate-CoA ligase activity (GO:0003987);; Molecular Function: 4-coumarate-CoA ligase activity (GO:0016207);; Molecular Function: Photinus-luciferin 4-monooxygenase (ATP-hydrolyzing) activity (GO:0047077);; Biological Process: oxidation-reduction process (GO:0055114);;	K01904|0|csv:101210868|K01904 4-coumarate--CoA ligase [EC:6.2.1.12] | (RefSeq) 4-coumarate--CoA ligase 1-like	Ubiquinone and other terpenoid-quinone biosynthesis (ko00130);; Phenylalanine metabolism (ko00360);; Phenylpropanoid biosynthesis (ko00940)	[I]	Lipid transport and metabolism	AMP-binding enzyme;; AMP-binding enzyme C-terminal domain	4-coumarate--CoA ligase 1 OS=Nicotiana tabacum OX=4097 GN=4CL1 PE=2 SV=1	PREDICTED: 4-coumarate--CoA ligase 1-like [Cucumis sativus]
Csa2G080160	448.451	345.409	397.854	313.111	336.194	403.716	212.031	243.29	231.056	-0.169921	normal	-0.857577	down	-0.680115	down	[IR]	Lipid transport and metabolism;; General function prediction only	Molecular Function: carboxylic ester hydrolase activity (GO:0004091);; Cellular Component: extracellular region (GO:0005576);; Biological Process: lipid metabolic process (GO:0006629);;	--	--	--	--	GDSL-like Lipase/Acylhydrolase	GDSL esterase/lipase At5g33370 OS=Arabidopsis thaliana OX=3702 GN=At5g33370 PE=2 SV=1	PREDICTED: GDSL esterase/lipase At5g33370 [Cucumis sativus]
Csa2G119380	6.4105	3.50932	4.09139	5.34894	5.11303	4.99577	2.823	2.85671	2.4228	0.146713	normal	-0.855876	down	-0.995045	down	[M]	Cell wall/membrane/envelope biogenesis	Molecular Function: phospholipase C activity (GO:0004629);; Biological Process: phosphate-containing compound metabolic process (GO:0006796);; Cellular Component: membrane (GO:0016020);; Biological Process: cellular lipid metabolic process (GO:0044255);; Cellular Component: cytoplasmic part (GO:0044444);; Biological Process: response to stimulus (GO:0050896);;	K01114|0|csv:101203226|K01114 phospholipase C [EC:3.1.4.3] | (RefSeq) non-specific phospholipase C3-like	Inositol phosphate metabolism (ko00562);; Glycerophospholipid metabolism (ko00564);; Ether lipid metabolism (ko00565)	--	--	Phosphoesterase family	Non-specific phospholipase C3 OS=Arabidopsis thaliana OX=3702 GN=NPC3 PE=2 SV=1	hypothetical protein Csa_2G119380 [Cucumis sativus]
Csa2G138200	469.433	426.403	456.118	414.896	444.524	474.863	257.855	281.213	234.959	-0.00692139	normal	-0.862573	down	-0.847954	down	[CI]	Energy production and conversion;; Lipid transport and metabolism	Molecular Function: protein binding (GO:0005515);; Cellular Component: endoplasmic reticulum membrane (GO:0005789);; Molecular Function: nitrate reductase (NADH) activity (GO:0009703);; Cellular Component: integral component of membrane (GO:0016021);; Biological Process: sterol biosynthetic process (GO:0016126);; Biological Process: pentacyclic triterpenoid biosynthetic process (GO:0019745);; Mol…	--	--	[C]	Energy production and conversion	Cytochrome b5-like Heme/Steroid binding domain	Cytochrome b5 isoform B OS=Arabidopsis thaliana OX=3702 GN=CYTB5-B PE=1 SV=1	PREDICTED: cytochrome b5 isoform B [Cucumis sativus]
Csa2G140360	37.8529	23.7905	32.1751	22.8172	15.1886	24.7628	13.7229	12.4166	16.543	-0.572173	normal	-1.20115	down	-0.621611	down	--	--	--	--	--	--	--	Nucleotide-diphospho-sugar transferase	Uncharacterized protein At1g28695 OS=Arabidopsis thaliana OX=3702 GN=At1g28695 PE=2 SV=1	PREDICTED: uncharacterized protein At1g28695 [Cucumis sativus]
Csa2G147920	889.349	757.937	761.202	742.372	766.619	699.685	281.844	382.547	264.593	-0.11389	normal	-1.43291	down	-1.31154	down	--	--	Biological Process: metabolic process (GO:0008152);; Biological Process: cellular process (GO:0009987);;	--	--	--	--	Transferase family	Protein ECERIFERUM 26 OS=Arabidopsis thaliana OX=3702 GN=CER26 PE=2 SV=1	PREDICTED: protein ECERIFERUM 26-like [Cucumis sativus]
Csa2G162150	4.00277	3.96441	4.31973	2.55646	2.99483	3.66793	1.90472	2.0234	1.95016	-0.401051	normal	-1.12114	down	-0.712258	down	[K]	Transcription	Biological Process: activation of MAPKK activity (GO:0000186);; Biological Process: response to molecule of bacterial origin (GO:0002237);; Molecular Function: MAP kinase kinase kinase activity (GO:0004709);; Molecular Function: ATP binding (GO:0005524);; Cellular Component: plasma membrane (GO:0005886);; Biological Process: protein glycosylation (GO:0006486);; Biological Process: transmembrane r…	--	--	--	--	Protein kinase domain;; Protein tyrosine kinase;; Leucine rich repeat;; Leucine Rich repeats (2 copies);; Leucine rich repeat N-terminal domain;; Leucine Rich Repeat	Probable leucine-rich repeat receptor-like protein kinase At5g63930 OS=Arabidopsis thaliana OX=3702 GN=At5g63930 PE=2 SV=1	PREDICTED: probable leucine-rich repeat receptor-like protein kinase At2g33170 [Cucumis sativus]
Csa2G172480	17.7401	10.4275	11.7373	9.28202	10.7569	10.8294	2.0847	2.85136	1.31399	-0.350989	normal	-2.77313	down	-2.41527	down	[S]	Function unknown	Cellular Component: cytoplasm (GO:0005737);; Biological Process: lipid biosynthetic process (GO:0008610);; Molecular Function: cyclopropane-fatty-acyl-phospholipid synthase activity (GO:0008825);; Molecular Function: oxidoreductase activity (GO:0016491);; Biological Process: methylation (GO:0032259);; Biological Process: oxidation-reduction process (GO:0055114);;	K00574|0|csv:101213610|K00574 cyclopropane-fatty-acyl-phospholipid synthase [EC:2.1.1.79] | (RefSeq) uncharacterized LOC101213610	--	--	--	Mycolic acid cyclopropane synthetase;; Methyltransferase domain;; Methyltransferase domain;; Methyltransferase small domain	Probable (S)-tetrahydroprotoberberine N-methyltransferase 2 OS=Papaver bracteatum OX=215227 PE=2 SV=1	hypothetical protein Csa_2G172480 [Cucumis sativus]
Csa2G174080	26.5476	20.3397	25.3359	15.9205	16.4069	19.5573	5.11051	7.14794	6.50147	-0.465979	normal	-2.00314	down	-1.529	down	--	--	--	--	--	--	--	--	--	hypothetical protein Csa_2G174080 [Cucumis sativus]
Csa2G215520	4.73067	3.57423	3.35329	3.97399	3.51802	3.85791	2.24432	2.31476	2.87517	-0.0293358	normal	-0.713865	down	-0.676711	down	[P]	Inorganic ion transport and metabolism	Biological Process: maltose metabolic process (GO:0000023);; Biological Process: sulfate assimilation (GO:0000103);; Biological Process: selenium compound metabolic process (GO:0001887);; Molecular Function: sulfate adenylyltransferase (ATP) activity (GO:0004781);; Cellular Component: mitochondrion (GO:0005739);; Cellular Component: cytosol (GO:0005829);; Cellular Component: plasma membrane (GO:0…	K13811|0|csv:101218495|K13811 3'-phosphoadenosine 5'-phosphosulfate synthase [EC:2.7.7.4 2.7.1.25] | (RefSeq) ATP sulfurylase 1, chloroplastic	Purine metabolism (ko00230);; Monobactam biosynthesis (ko00261);; Selenocompound metabolism (ko00450);; Sulfur metabolism (ko00920)	[P]	Inorganic ion transport and metabolism	ATP-sulfurylase;; PUA-like domain	ATP sulfurylase 1, chloroplastic OS=Arabidopsis thaliana OX=3702 GN=APS1 PE=1 SV=1	PREDICTED: ATP sulfurylase 1, chloroplastic [Cucumis sativus]
Csa2G226860	5.8817	4.33946	4.21403	2.19672	3.48832	3.89145	0.190406	0.724252	0.344556	-0.583436	normal	-3.52067	down	-2.92993	down	--	--	Molecular Function: iron ion binding (GO:0005506);; Cellular Component: chloroplast (GO:0009507);; Cellular Component: plastid (GO:0009536);; Biological Process: secondary shoot formation (GO:0010223);; Molecular Function: cis-trans isomerase activity (GO:0016859);; Biological Process: strigolactone biosynthetic process (GO:1901601);;	K17911|0|csv:101219340|K17911 beta-carotene isomerase [EC:5.2.1.14] | (RefSeq) beta-carotene isomerase D27, chloroplastic	Carotenoid biosynthesis (ko00906)	--	--	Domain of unknown function (DUF4033)	Beta-carotene isomerase D27, chloroplastic OS=Oryza sativa subsp. japonica OX=39947 GN=D27 PE=1 SV=1	PREDICTED: beta-carotene isomerase D27, chloroplastic [Cucumis sativus]
Csa2G245420	0.629737	0.996789	1.14856	0.464269	0.789562	0.585869	0.379922	0.374877	0.297532	-0.225339	normal	-1.0961	down	-0.862347	down	--	--	Molecular Function: 1-phosphatidylinositol 4-kinase activity (GO:0004430);; Molecular Function: protein serine/threonine kinase activity (GO:0004674);; Molecular Function: ATP binding (GO:0005524);; Molecular Function: phosphatidylinositol-4,5-bisphosphate binding (GO:0005546);; Cellular Component: plasma membrane (GO:0005886);; Biological Process: protein phosphorylation (GO:0006468);; Cellular …	K00888|0|csv:101214424|K00888 phosphatidylinositol 4-kinase A [EC:2.7.1.67] | (RefSeq) phosphatidylinositol 4-kinase alpha 1	Inositol phosphate metabolism (ko00562);; Phosphatidylinositol signaling system (ko04070)	[T]	Signal transduction mechanisms	Phosphatidylinositol 3- and 4-kinase;; Phosphoinositide 3-kinase family, accessory domain (PIK domain)	Phosphatidylinositol 4-kinase alpha 1 OS=Arabidopsis thaliana OX=3702 GN=PI4KA1 PE=1 SV=2	hypothetical protein Csa_2G245420 [Cucumis sativus]
Csa2G248750	5.41438	5.48519	4.62812	3.48784	3.79279	4.39972	0.675906	0.86566	0.448924	-0.397082	normal	-3.00429	down	-2.60046	down	--	--	Molecular Function: transporter activity (GO:0005215);; Cellular Component: Golgi apparatus (GO:0005794);; Biological Process: transport (GO:0006810);; Molecular Function: phosphatidylinositol transporter activity (GO:0008526);; Biological Process: flower development (GO:0009908);; Biological Process: cell tip growth (GO:0009932);; Biological Process: root epidermal cell differentiation (GO:00100…	--	--	[I]	Lipid transport and metabolism	CRAL/TRIO domain;; CRAL/TRIO, N-terminal domain	Phosphatidylinositol/phosphatidylcholine transfer protein SFH3 OS=Arabidopsis thaliana OX=3702 GN=SFH3 PE=2 SV=1	PREDICTED: phosphatidylinositol/phosphatidylcholine transfer protein SFH3-like isoform X1 [Cucumis sativus]
Csa2G263940	988.391	811.578	1013.23	883.438	908.402	915.793	354.519	450.31	396.63	-0.0434889	normal	-1.28692	down	-1.23521	down	--	--	--	--	--	--	--	Pollen proteins Ole e I like	Proline-rich protein 4 OS=Arabidopsis thaliana OX=3702 GN=PRP4 PE=2 SV=1	PREDICTED: proline-rich protein 4 isoform X1 [Cucumis sativus]
Csa2G264000	1026.61	1002.72	975.562	911.693	940.323	880.447	462.312	601.614	418.611	-0.123549	normal	-1.0754	down	-0.944208	down	--	--	--	--	--	--	--	Pollen proteins Ole e I like	--	hypothetical protein Csa_2G264000 [Cucumis sativus]
Csa2G270840	17.5925	13.836	21.7242	15.7557	16.5247	19.142	9.02239	9.70767	12.1807	-0.03452	normal	-0.838233	down	-0.794638	down	--	--	Biological Process: response to stress (GO:0006950);;	--	--	--	--	Arabidopsis phospholipase-like protein (PEARLI 4)	--	PREDICTED: uncharacterized protein LOC101220927 isoform X1 [Cucumis sativus]
Csa2G286510	6.21678	4.75201	5.57032	4.78334	6.74145	5.2633	2.16941	4.32292	2.85423	0.0311557	normal	-0.881489	down	-0.904252	down	[T]	Signal transduction mechanisms	Molecular Function: kinase activity (GO:0016301);; Biological Process: cellular metabolic process (GO:0044237);;	K04733|0|csv:101211774|K04733 interleukin-1 receptor-associated kinase 4 [EC:2.7.11.1] | (RefSeq) protein LYK5-like	--	--	--	Protein tyrosine kinase;; Protein kinase domain	Serine/threonine receptor-like kinase NFP OS=Medicago truncatula OX=3880 GN=NFP PE=1 SV=1	PREDICTED: protein LYK5-like [Cucumis sativus]
Csa2G286540	5.59829	4.02078	3.74584	4.57617	4.41348	3.67792	3.7357	1.88774	1.5053	-0.0656396	normal	-0.962844	down	-0.889284	down	--	--	--	--	--	--	--	Domain of unknown function (DUF4228)	--	PREDICTED: uncharacterized protein LOC101206880 [Cucumis sativus]
Csa2G287070	10.2324	8.65081	7.77303	7.29988	7.3661	7.47498	3.75375	4.9682	4.56437	-0.255991	normal	-1.06146	down	-0.79777	down	--	--	--	--	--	--	--	Domain of unknown function (DUF4228)	--	hypothetical protein Csa_2G287070 [Cucumis sativus]
Csa2G292770	20.3779	18.4299	9.41201	18.0206	9.46036	8.95817	5.72992	7.24282	11.9948	-0.392744	normal	-1.01535	down	-0.615463	down	[E]	Amino acid transport and metabolism	Molecular Function: catalytic activity (GO:0003824);; Cellular Component: plasma membrane (GO:0005886);; Biological Process: metabolic process (GO:0008152);; Molecular Function: pyridoxal phosphate binding (GO:0030170);;	--	--	[H]	Coenzyme transport and metabolism	--	Molybdenum cofactor sulfurase OS=Solanum lycopersicum OX=4081 GN=FLACCA PE=2 SV=1	PREDICTED: uncharacterized protein LOC101209057 [Cucumis sativus]
Csa2G292840	49.1264	43.2806	52.0095	34.155	55.7374	48.7703	18.7205	25.6834	30.9464	-0.0471947	normal	-0.998678	down	-0.942318	down	[R]	General function prediction only	--	--	--	[I]	Lipid transport and metabolism	Patatin-like phospholipase	Patatin-like protein 1 OS=Oryza sativa subsp. indica OX=39946 GN=PLP1 PE=3 SV=1	hypothetical protein Csa_2G292840 [Cucumis sativus]
Csa2G346080	284.758	211.905	234.632	230.615	237.584	239.433	130.687	168.011	142.087	-0.038871	normal	-0.792024	down	-0.745609	down	[IR]	Lipid transport and metabolism;; General function prediction only	Molecular Function: hydrolase activity, acting on ester bonds (GO:0016788);;	--	--	--	--	GDSL-like Lipase/Acylhydrolase	GDSL esterase/lipase EXL3 OS=Arabidopsis thaliana OX=3702 GN=EXL3 PE=2 SV=1	PREDICTED: GDSL esterase/lipase EXL3 [Cucumis sativus]
Csa2G349000	30.4993	31.2909	27.7902	22.2139	28.4738	23.7573	14.0531	14.4778	12.9779	-0.252193	normal	-1.16177	down	-0.90165	down	[I]	Lipid transport and metabolism	Molecular Function: peroxidase activity (GO:0004601);; Cellular Component: extracellular region (GO:0005576);; Biological Process: response to oxidative stress (GO:0006979);; Molecular Function: heme binding (GO:0020037);; Molecular Function: metal ion binding (GO:0046872);; Biological Process: oxidation-reduction process (GO:0055114);;	--	--	--	--	--	--	PREDICTED: uncharacterized protein LOC101208155 [Cucumis sativus]
Csa2G354680	26.4416	28.288	28.3912	27.1496	21.7592	25.453	14.6938	23.0959	20.6459	-0.114042	normal	-0.729347	down	-0.606704	down	--	--	Molecular Function: transcription factor activity, sequence-specific DNA binding (GO:0003700);; Cellular Component: plasma membrane (GO:0005886);; Biological Process: regulation of transcription, DNA-templated (GO:0006355);; Biological Process: membrane fusion (GO:0006944);; Molecular Function: zinc ion binding (GO:0008270);; Molecular Function: actin filament binding (GO:0051015);; Biological Pr…	K09377|4.5216e-145|csv:101210188|K09377 cysteine and glycine-rich protein | (RefSeq) LIM domain-containing protein WLIM1	--	[TZ]	Signal transduction mechanisms;; Cytoskeleton	LIM domain	LIM domain-containing protein WLIM1 OS=Arabidopsis thaliana OX=3702 GN=WLIM1 PE=1 SV=1	PREDICTED: LIM domain-containing protein WLIM1 [Cucumis sativus]
Csa2G359930	2.94542	7.28608	5.62318	2.25004	2.55171	4.4585	1.8345	1.52295	1.82713	-0.750181	normal	-1.64782	down	-0.889231	down	--	--	--	--	--	[T]	Signal transduction mechanisms	EF hand;; EF-hand domain pair;; EF-hand domain;; EF-hand domain pair;; EF hand	Probable calcium-binding protein CML14 OS=Oryza sativa subsp. japonica OX=39947 GN=CML14 PE=2 SV=1	PREDICTED: calcium-binding protein-like [Cucumis sativus]
Csa2G360780	26.139	22.9932	24.8279	23.8997	26.7409	27.4458	14.5021	15.4617	19.1437	0.0900709	normal	-0.651706	down	-0.733365	down	[QV]	Secondary metabolites biosynthesis, transport and catabolism;; Defense mechanisms	Biological Process: sulfur amino acid metabolic process (GO:0000096);; Biological Process: MAPK cascade (GO:0000165);; Molecular Function: monooxygenase activity (GO:0004497);; Molecular Function: iron ion binding (GO:0005506);; Cellular Component: mitochondrion (GO:0005739);; Biological Process: glycine catabolic process (GO:0006546);; Biological Process: tryptophan catabolic process (GO:0006569…	K01723|0|csv:101221732|K01723 hydroperoxide dehydratase [EC:4.2.1.92] | (RefSeq) AOS; allene oxide synthase	alpha-Linolenic acid metabolism (ko00592)	--	--	Cytochrome P450	Allene oxide synthase 1, chloroplastic OS=Solanum lycopersicum OX=4081 GN=AOS1 PE=2 SV=1	allene oxide synthase [Cucumis sativus]
Csa2G361550	129.89	107.884	118.482	112.639	120.838	118.404	69.0493	76.6458	69.3429	-0.00786026	normal	-0.784118	down	-0.768355	down	--	--	Molecular Function: transporter activity (GO:0005215);; Cellular Component: membrane (GO:0016020);; Molecular Function: oxidoreductase activity (GO:0016491);; Biological Process: single-organism transport (GO:0044765);; Biological Process: response to stimulus (GO:0050896);;	--	--	--	--	Protein of unknown function (DUF1195)	--	PREDICTED: uncharacterized protein LOC101218892 [Cucumis sativus]
Csa2G361830	19.0557	14.1141	14.2557	15.7159	15.8754	17.8443	7.57887	8.0696	9.63922	0.0686114	normal	-0.970324	down	-1.03105	down	--	--	--	--	--	--	--	--	--	PREDICTED: uncharacterized protein LOC105434756 [Cucumis sativus]
Csa2G362390	81.1193	61.2594	62.7746	68.3738	59.9012	67.0593	37.3482	37.9696	39.1677	-0.0620439	normal	-0.90406	down	-0.834722	down	--	--	Molecular Function: transcription factor activity, sequence-specific DNA binding (GO:0003700);; Biological Process: regulation of transcription, DNA-templated (GO:0006355);; Molecular Function: sequence-specific DNA binding (GO:0043565);;	--	--	--	--	bZIP transcription factor;; Basic region leucine zipper	bZIP transcription factor 44 OS=Arabidopsis thaliana OX=3702 GN=BZIP44 PE=1 SV=1	PREDICTED: ocs element-binding factor 1 [Cucumis sativus]
Csa2G362490	7.9061	7.90537	10.0587	5.04513	6.07198	7.1681	1.62528	1.88479	2.08793	-0.48698	normal	-2.2531	down	-1.75743	down	[O]	Posttranslational modification, protein turnover, chaperones	Cellular Component: cell wall (GO:0005618);; Cellular Component: mitochondrion (GO:0005739);; Cellular Component: vacuole (GO:0005773);; Cellular Component: Golgi apparatus (GO:0005794);; Cellular Component: cytosol (GO:0005829);; Cellular Component: plasma membrane (GO:0005886);; Biological Process: protein folding (GO:0006457);; Biological Process: glycerol ether metabolic process (GO:0006662);…	K03671|4.05436e-77|csv:101212030|K03671 thioredoxin 1 | (RefSeq) thioredoxin H-type	--	[O]	Posttranslational modification, protein turnover, chaperones	Thioredoxin;; Thioredoxin-like domain;; Thioredoxin-like;; Thioredoxin-like;; AhpC/TSA family	Thioredoxin H-type OS=Fagopyrum esculentum OX=3617 PE=3 SV=1	PREDICTED: thioredoxin H-type [Cucumis sativus]
Csa2G376790	7.69775	5.83624	6.97377	3.93698	4.22322	6.65498	1.2474	1.27311	1.37245	-0.459043	normal	-2.44629	down	-1.97988	down	--	--	Molecular Function: DNA binding (GO:0003677);; Molecular Function: transcription factor activity, sequence-specific DNA binding (GO:0003700);; Biological Process: regulation of transcription, DNA-templated (GO:0006355);; Biological Process: multicellular organism development (GO:0007275);;	--	--	--	--	No apical meristem (NAM) protein	Protein CUP-SHAPED COTYLEDON 2 OS=Arabidopsis thaliana OX=3702 GN=NAC098 PE=1 SV=1	PREDICTED: transcription factor JUNGBRUNNEN 1 [Cucumis sativus]
Csa2G376800	88.1216	62.473	68.7747	64.3261	64.3447	71.5399	40.1536	33.6552	35.6014	-0.121767	normal	-1.07006	down	-0.941006	down	--	--	Cellular Component: vacuolar membrane (GO:0005774);; Cellular Component: endoplasmic reticulum (GO:0005783);; Cellular Component: Golgi apparatus (GO:0005794);; Biological Process: glucose catabolic process (GO:0006007);; Biological Process: D-xylose metabolic process (GO:0042732);;	--	--	--	--	--	--	PREDICTED: uncharacterized protein LOC101209922 [Cucumis sativus]
Csa2G376820	33.4555	26.2589	28.4126	16.3314	27.0735	29.8901	7.76184	8.26192	7.05105	-0.258704	normal	-1.98999	down	-1.72407	down	[T]	Signal transduction mechanisms	--	--	--	[T]	Signal transduction mechanisms	EF hand;; EF-hand domain;; EF hand;; EF-hand domain pair	Probable calcium-binding protein CML43 OS=Arabidopsis thaliana OX=3702 GN=CML43 PE=2 SV=1	PREDICTED: calmodulin-like protein 2 [Cucumis sativus]
Csa2G376830	51.3215	56.1522	59.1296	48.9358	45.6644	53.6439	31.1779	28.3341	31.8132	-0.152538	normal	-0.923851	down	-0.763072	down	--	--	Molecular Function: protein dimerization activity (GO:0046983);;	--	--	--	--	bZIP transcription factor;; Basic region leucine zipper;; Basic leucine-zipper C terminal	Basic leucine zipper 9 OS=Arabidopsis thaliana OX=3702 GN=BZIP9 PE=1 SV=1	PREDICTED: basic leucine zipper 9 [Cucumis sativus]
Csa2G377370	17.1744	17.6205	13.5841	14.1937	19.4875	15.164	11.6343	9.72667	11.8034	0.0269404	normal	-0.60362	down	-0.622557	down	[P]	Inorganic ion transport and metabolism	Molecular Function: hydrolase activity, hydrolyzing O-glycosyl compounds (GO:0004553);; Biological Process: carbohydrate metabolic process (GO:0005975);; Biological Process: response to lead ion (GO:0010288);; Biological Process: response to cadmium ion (GO:0046686);;	--	--	[P]	Inorganic ion transport and metabolism	ChaC-like protein	Gamma-glutamylcyclotransferase 2-1 OS=Arabidopsis thaliana OX=3702 GN=GGCT2;1 PE=1 SV=1	hypothetical protein Csa_2G377370 [Cucumis sativus]
Csa2G377950	5.69937	4.76295	4.35324	4.73688	5.46367	5.35604	3.15651	3.25741	3.12366	0.0600878	normal	-0.717857	down	-0.770209	down	[M]	Cell wall/membrane/envelope biogenesis	Molecular Function: nucleotide binding (GO:0000166);; Cellular Component: cytosol (GO:0005829);; Molecular Function: dTDP-glucose 4,6-dehydratase activity (GO:0008460);; Molecular Function: dTDP-4-dehydrorhamnose reductase activity (GO:0008831);; Cellular Component: plasmodesma (GO:0009506);; Biological Process: response to sucrose (GO:0009744);; Biological Process: mucilage biosynthetic process …	K12450|0|csv:101214230|K12450 UDP-glucose 4,6-dehydratase [EC:4.2.1.76] | (RefSeq) trifunctional UDP-glucose 4,6-dehydratase/UDP-4-keto-6-deoxy-D-glucose 3,5-epimerase/UDP-4-keto-L-rhamnose-reductase RHM2	Amino sugar and nucleotide sugar metabolism (ko00520)	[G]	Carbohydrate transport and metabolism	GDP-mannose 4,6 dehydratase;; NAD dependent epimerase/dehydratase family;; RmlD substrate binding domain;; 3-beta hydroxysteroid dehydrogenase/isomerase family;; Polysaccharide biosynthesis protein;; Male sterility protein	Trifunctional UDP-glucose 4,6-dehydratase/UDP-4-keto-6-deoxy-D-glucose 3,5-epimerase/UDP-4-keto-L-rhamnose-reductase RHM1 OS=Arabidopsis thaliana OX=3702 GN=RHM1 PE=1 SV=1	PREDICTED: trifunctional UDP-glucose 4,6-dehydratase/UDP-4-keto-6-deoxy-D-glucose 3,5-epimerase/UDP-4-keto-L-rhamnose-reductase RHM2 [Cucumis sativus]
Csa2G379200	17.86	15.7951	16.4953	17.2785	17.9486	16.2633	12.3814	11.6441	10.2586	0.1028	normal	-0.612024	down	-0.706863	down	--	--	--	--	--	--	--	zinc-finger of the FCS-type, C2-C2	Protein MARD1 OS=Arabidopsis thaliana OX=3702 GN=MARD1 PE=2 SV=2	hypothetical protein Csa_2G379200 [Cucumis sativus]
Csa2G385070	28.6222	23.9599	36.4082	19.5495	18.7368	30.8395	18.5835	10.4157	12.6194	-0.276538	normal	-1.1038	down	-0.81928	down	[O]	Posttranslational modification, protein turnover, chaperones	Molecular Function: phosphatidate cytidylyltransferase activity (GO:0004605);; Biological Process: phospholipid biosynthetic process (GO:0008654);; Cellular Component: chloroplast (GO:0009507);; Biological Process: vitamin E biosynthetic process (GO:0010189);; Molecular Function: phytol kinase activity (GO:0010276);; Cellular Component: membrane (GO:0016020);; Cellular Component: integral compone…	K18678|0|csv:101205798|K18678 phytol kinase [EC:2.7.1.182] | (RefSeq) probable phytol kinase 1, chloroplastic	--	[S]	Function unknown	--	Probable phytol kinase 1, chloroplastic OS=Glycine max OX=3847 PE=2 SV=1	PREDICTED: probable phytol kinase 1, chloroplastic isoform X1 [Cucumis sativus]
Csa2G403660	86.6296	80.2632	86.1943	74.9171	81.717	71.6266	50.3002	43.2334	40.1869	-0.165679	normal	-1.0071	down	-0.833378	down	--	--	--	--	--	--	--	--	--	PREDICTED: uncharacterized protein DDB_G0290685-like isoform X2 [Cucumis sativus]
Csa3G020060	40.841	27.9124	31.5626	23.706	28.5533	27.0556	7.35075	7.81252	8.18898	-0.331615	normal	-2.16633	down	-1.82695	down	--	--	Molecular Function: aspartic-type endopeptidase activity (GO:0004190);; Cellular Component: extracellular region (GO:0005576);; Biological Process: proteolysis (GO:0006508);; Cellular Component: plant-type cell wall (GO:0009505);;	--	--	[O]	Posttranslational modification, protein turnover, chaperones	Xylanase inhibitor N-terminal;; Xylanase inhibitor C-terminal;; Eukaryotic aspartyl protease	Probable aspartyl protease At4g16563 OS=Arabidopsis thaliana OX=3702 GN=At4g16563 PE=2 SV=1	PREDICTED: aspartic proteinase nepenthesin-1 [Cucumis sativus]
Csa3G036540	43.9866	32.7293	36.0202	40.2153	36.4146	29.6411	22.0878	15.8625	12.1349	-0.0748151	normal	-1.23095	down	-1.1487	down	[OT]	Posttranslational modification, protein turnover, chaperones;; Signal transduction mechanisms	Biological Process: metabolic process (GO:0008152);; Biological Process: response to abscisic acid (GO:0009737);; Molecular Function: amino acid binding (GO:0016597);;	--	--	--	--	ACT domain;; ACT domain;; ACT domain	ACT domain-containing protein ACR8 OS=Arabidopsis thaliana OX=3702 GN=ACR8 PE=2 SV=1	PREDICTED: ACT domain-containing protein ACR8-like [Cucumis sativus]
Csa3G038100	297.63	228.902	260.133	287.387	271.838	317.046	179.217	188.388	169.319	0.164777	normal	-0.612334	down	-0.769718	down	--	--	Cellular Component: plasma membrane (GO:0005886);; Molecular Function: organic anion transmembrane transporter activity (GO:0008514);; Biological Process: plant-type cell wall biogenesis (GO:0009832);; Biological Process: organic anion transport (GO:0015711);; Cellular Component: integral component of membrane (GO:0016021);; Biological Process: cell growth (GO:0016049);; Biological Process: cellu…	--	--	[GE]	Carbohydrate transport and metabolism;; Amino acid transport and metabolism	Triose-phosphate Transporter family;; EamA-like transporter family	Probable sugar phosphate/phosphate translocator At1g12500 OS=Arabidopsis thaliana OX=3702 GN=At1g12500 PE=1 SV=1	hypothetical protein Csa_3G038100 [Cucumis sativus]
Csa3G041370	74.6635	43.7845	55.8658	38.6762	34.5145	44.9353	4.07738	8.79097	4.75496	-0.553687	normal	-3.34258	down	-2.78219	down	--	--	Molecular Function: carbon-oxygen lyase activity, acting on phosphates (GO:0016838);;	--	--	--	--	Terpene synthase family, metal binding domain	(-)-germacrene D synthase OS=Vitis vinifera OX=29760 GN=VIT_19s0014g04930 PE=1 SV=1	PREDICTED: (-)-germacrene D synthase-like [Cucumis sativus]
Csa3G095020	65.1024	56.6493	56.3853	63.8609	62.1739	53.581	33.5745	39.3605	34.0762	0.0199668	normal	-0.793637	down	-0.805773	down	[G]	Carbohydrate transport and metabolism	Molecular Function: galactose transmembrane transporter activity (GO:0005354);; Molecular Function: glucose transmembrane transporter activity (GO:0005355);; Molecular Function: myo-inositol transmembrane transporter activity (GO:0005365);; Cellular Component: plasma membrane (GO:0005886);; Molecular Function: D-xylose transmembrane transporter activity (GO:0015148);; Molecular Function: glycerol…	--	--	[R]	General function prediction only	Sugar (and other) transporter;; Major Facilitator Superfamily	Polyol transporter 5 OS=Arabidopsis thaliana OX=3702 GN=PLT5 PE=1 SV=2	PREDICTED: putative polyol transporter 2 [Cucumis sativus]
Csa3G102320	9.28248	8.38458	5.81543	8.36713	5.87147	5.53382	2.41976	4.62416	1.9557	-0.234593	normal	-1.46259	down	-1.22132	down	[T]	Signal transduction mechanisms	Molecular Function: nucleotide binding (GO:0000166);; Molecular Function: substrate-specific transmembrane transporter activity (GO:0022891);; Molecular Function: ATPase activity, coupled to transmembrane movement of substances (GO:0042626);;	--	--	[Q]	Secondary metabolites biosynthesis, transport and catabolism	ABC-2 type transporter;; ABC transporter;; AAA domain, putative AbiEii toxin, Type IV TA system	ABC transporter G family member 9 OS=Arabidopsis thaliana OX=3702 GN=ABCG9 PE=3 SV=2	hypothetical protein Csa_3G102320 [Cucumis sativus]
Csa3G110620	335.564	127.243	334.354	293.664	209.36	223.179	104.569	189.595	83.9303	-0.129295	normal	-1.13949	down	-1.00256	down	[O]	Posttranslational modification, protein turnover, chaperones	Molecular Function: translation elongation factor activity (GO:0003746);; Cellular Component: eukaryotic translation elongation factor 1 complex (GO:0005853);; Biological Process: translational elongation (GO:0006414);; Biological Process: response to metal ion (GO:0010038);; Cellular Component: membrane (GO:0016020);; Cellular Component: intracellular membrane-bounded organelle (GO:0043231);; Ce…	K03233|0|csv:101215571|K03233 elongation factor 1-gamma | (RefSeq) elongation factor 1-gamma-like	--	[O]	Posttranslational modification, protein turnover, chaperones	Elongation factor 1 gamma, conserved domain;; Glutathione S-transferase, N-terminal domain;; Glutathione S-transferase, N-terminal domain;; Glutathione S-transferase, C-terminal domain;; Glutathione S-transferase, N-terminal domain;; Glutathione S-transferase, C-terminal domain	Elongation factor 1-gamma OS=Prunus avium OX=42229 PE=2 SV=1	hypothetical protein Csa_3G110620 [Cucumis sativus]
Csa3G114430	267.576	232.527	229.722	225.297	244.552	264.443	150.74	182.798	151.077	0.0191066	normal	-0.650759	down	-0.662469	down	--		Biological Process: polysaccharide biosynthetic process (GO:0000271);; Molecular Function: enoyl-CoA hydratase activity (GO:0004300);; Molecular Function: protein tyrosine phosphatase activity (GO:0004725);; Cellular Component: nucleus (GO:0005634);; Cellular Component: cytosol (GO:0005829);; Biological Process: multidimensional cell growth (GO:0009825);; Cellular Component: fatty acid elongase c…	K10703|2.07611e-150|csv:101214048|K10703 very-long-chain (3R)-3-hydroxyacyl-CoA dehydratase [EC:4.2.1.134] | (RefSeq) very-long-chain (3R)-3-hydroxyacyl-CoA dehydratase PASTICCINO 2A	Fatty acid elongation (ko00062);; Biosynthesis of unsaturated fatty acids (ko01040);; Fatty acid metabolism (ko01212)	[R]	General function prediction only	Protein tyrosine phosphatase-like protein, PTPLA	Very-long-chain (3R)-3-hydroxyacyl-CoA dehydratase PASTICCINO 2A OS=Oryza sativa subsp. japonica OX=39947 GN=PAS2A PE=2 SV=2	PREDICTED: very-long-chain (3R)-3-hydroxyacyl-CoA dehydratase PASTICCINO 2A [Cucumis sativus]
Csa3G114450	13.1958	9.12305	12.1448	10.1882	9.13096	11.9696	3.25722	4.63868	3.61665	-0.130927	normal	-1.64288	down	-1.50443	down	--	--	--	--	--	--	--	KIP1-like protein	Protein NETWORKED 2D OS=Arabidopsis thaliana OX=3702 GN=NET2D PE=3 SV=1	PREDICTED: protein NETWORKED 2D-like [Cucumis sativus]
Csa3G118210	6.17675	3.95683	4.76745	3.43208	3.7115	4.00752	2.03447	2.55674	1.77356	-0.413411	normal	-1.2758	down	-0.854398	down	--	--	--	--	--	--	--	--	--	hypothetical protein Csa_3G118210 [Cucumis sativus]
Csa3G119260	8.92427	9.51741	8.9936	5.94592	6.19635	7.64599	2.74697	2.9522	3.91089	-0.463479	normal	-1.57336	down	-1.10174	down	[CI]	Energy production and conversion;; Lipid transport and metabolism	Molecular Function: binding (GO:0005488);;	--	--	[C]	Energy production and conversion	Cytochrome b5-like Heme/Steroid binding domain	Cytochrome b5 OS=Brassica oleracea var. botrytis OX=3715 GN=CYB5 PE=1 SV=1	PREDICTED: cytochrome b5 [Cucumis sativus]
Csa3G119480	8.35776	13.8574	19.9117	13.3213	9.71085	12.0216	6.93881	7.49709	8.61608	-0.228218	normal	-0.939666	down	-0.701412	down	--	--	--	--	--	--	--	--	--	PREDICTED: uncharacterized protein At4g00950 isoform X1 [Cucumis sativus]
Csa3G121560	57.3968	60.0921	66.5079	44.9979	54.4703	67.143	18.1458	18.8634	32.2733	-0.129303	normal	-1.46908	down	-1.33082	down	[V]	Defense mechanisms	Cellular Component: cytosol (GO:0005829);; Cellular Component: plasma membrane (GO:0005886);; Biological Process: response to desiccation (GO:0009269);; Biological Process: response to cold (GO:0009409);; Biological Process: response to wounding (GO:0009611);; Biological Process: response to high light intensity (GO:0009644);; Biological Process: response to abscisic acid (GO:0009737);; Biologica…	--	--	--	--	Late embryogenesis abundant protein	Desiccation protectant protein Lea14 homolog OS=Glycine max OX=3847 PE=2 SV=1	PREDICTED: desiccation protectant protein Lea14 homolog [Cucumis sativus]
Csa3G126760	6.98803	7.23233	2.34462	5.77747	6.65256	3.88075	2.39343	2.8118	3.09057	0.0676081	normal	-0.88622	down	-0.947163	down	[C]	Energy production and conversion	Cellular Component: nucleus (GO:0005634);; Cellular Component: mitochondrion (GO:0005739);; Cellular Component: chloroplast (GO:0009507);; Molecular Function: oxidoreductase activity, acting on NAD(P)H, nitrogenous group as acceptor (GO:0016657);; Biological Process: oxidation-reduction process (GO:0055114);;	--	--	--	--	Nitroreductase family	--	PREDICTED: uncharacterized protein LOC101216535 [Cucumis sativus]
Csa3G127750	12.0033	5.26774	3.73962	7.84058	8.81652	7.62867	2.197	3.4994	1.34189	0.219291	normal	-1.62294	down	-1.83684	down	--	--	Molecular Function: iron ion binding (GO:0005506);; Biological Process: fatty acid biosynthetic process (GO:0006633);; Biological Process: wax biosynthetic process (GO:0010025);; Biological Process: cutin biosynthetic process (GO:0010143);; Cellular Component: integral component of membrane (GO:0016021);; Molecular Function: oxidoreductase activity (GO:0016491);; Biological Process: cuticle devel…	K15404|0|csv:101221193|K15404 aldehyde decarbonylase [EC:4.1.99.5] | (RefSeq) protein ECERIFERUM 1-like	Cutin, suberine and wax biosynthesis (ko00073)	--	--	WAX2 C-terminal domain;; Fatty acid hydroxylase superfamily	Protein ECERIFERUM 1 OS=Arabidopsis thaliana OX=3702 GN=CER1 PE=1 SV=1	hypothetical protein Csa_3G127750 [Cucumis sativus]
Csa3G127770	9.11872	6.54012	8.65817	6.93596	6.78087	6.85923	3.50686	3.733	2.24672	-0.186381	normal	-1.43078	down	-1.23645	down	--	--	Molecular Function: iron ion binding (GO:0005506);; Biological Process: fatty acid biosynthetic process (GO:0006633);; Biological Process: wax biosynthetic process (GO:0010025);; Biological Process: cutin biosynthetic process (GO:0010143);; Cellular Component: integral component of membrane (GO:0016021);; Molecular Function: oxidoreductase activity (GO:0016491);; Biological Process: cuticle devel…	K15404|0|csv:101203691|K15404 aldehyde decarbonylase [EC:4.1.99.5] | (RefSeq) protein ECERIFERUM 1-like	Cutin, suberine and wax biosynthesis (ko00073)	--	--	WAX2 C-terminal domain;; Fatty acid hydroxylase superfamily	Protein ECERIFERUM 1 OS=Arabidopsis thaliana OX=3702 GN=CER1 PE=1 SV=1	hypothetical protein Csa_3G127770 [Cucumis sativus]
Csa3G128900	41.5684	35.4961	34.3937	41.1263	38.3935	35.6819	23.5045	27.366	20.3232	0.0590949	normal	-0.70521	down	-0.756869	down	--	--	Molecular Function: ubiquitin-protein transferase activity (GO:0004842);; Biological Process: protein ubiquitination (GO:0016567);; Molecular Function: metal ion binding (GO:0046872);;	K10663|6.31891e-154|csv:101221900|K10663 E3 ubiquitin-protein ligase ATL4 [EC:2.3.2.27] | (RefSeq) E3 ubiquitin-protein ligase ATL4	--	[O]	Posttranslational modification, protein turnover, chaperones	Ring finger domain;; RING-like zinc finger;; RING-H2 zinc finger domain;; Zinc finger, C3HC4 type (RING finger);; Zinc finger, C3HC4 type (RING finger);; Anaphase-promoting complex subunit 11 RING-H2 finger	E3 ubiquitin-protein ligase ATL4 OS=Arabidopsis thaliana OX=3702 GN=ATL4 PE=1 SV=1	PREDICTED: E3 ubiquitin-protein ligase ATL4 [Cucumis sativus]
Csa3G129660	1.67843	3.25674	2.4415	1.44401	2.55229	1.8395	1.01498	0.92507	0.93231	-0.31484	normal	-1.40654	down	-1.08271	down	[H]	Coenzyme transport and metabolism	Molecular Function: nucleotide binding (GO:0000166);; Molecular Function: adenosylhomocysteinase activity (GO:0004013);; Molecular Function: copper ion binding (GO:0005507);; Cellular Component: vacuolar membrane (GO:0005774);; Cellular Component: cytosol (GO:0005829);; Cellular Component: plasma membrane (GO:0005886);; Biological Process: gluconeogenesis (GO:0006094);; Biological Process: glycol…	K01251|0|csv:101209658|K01251 adenosylhomocysteinase [EC:3.3.1.1] | (RefSeq) adenosylhomocysteinase-like	Cysteine and methionine metabolism (ko00270)	[H]	Coenzyme transport and metabolism	S-adenosyl-L-homocysteine hydrolase;; S-adenosyl-L-homocysteine hydrolase, NAD binding domain;; D-isomer specific 2-hydroxyacid dehydrogenase, NAD binding domain;; Acetohydroxy acid isomeroreductase, NADPH-binding domain	Adenosylhomocysteinase OS=Medicago sativa OX=3879 GN=SAHH PE=2 SV=1	PREDICTED: adenosylhomocysteinase-like [Cucumis sativus]
Csa3G135050	3.53657	3.47111	2.56175	2.751	4.45156	2.70638	1.1547	1.37487	2.55541	0.0506807	normal	-1.04904	down	-1.09067	down	--	--	Molecular Function: DNA binding (GO:0003677);; Molecular Function: chromatin binding (GO:0003682);;	K09422|5.16494e-58|csv:105434828|K09422 myb proto-oncogene protein, plant | (RefSeq) myb-related protein Myb4-like	--	[K]	Transcription	Myb-like DNA-binding domain;; Myb-like DNA-binding domain	Transcription factor MYB4 OS=Oryza sativa subsp. japonica OX=39947 GN=MYB4 PE=2 SV=2	hypothetical protein Csa_3G135050 [Cucumis sativus]
Csa3G144140	180.753	162.725	160.197	129.954	183.532	196.713	91.5772	123.527	108.74	0.0286227	normal	-0.69618	down	-0.717139	down	[Q]	Secondary metabolites biosynthesis, transport and catabolism	Biological Process: fatty acid biosynthetic process (GO:0006633);; Biological Process: response to osmotic stress (GO:0006970);; Biological Process: response to cold (GO:0009409);; Biological Process: response to light stimulus (GO:0009416);; Biological Process: response to wounding (GO:0009611);; Molecular Function: fatty acid elongase activity (GO:0009922);; Biological Process: suberin biosynth…	K15397|0|csv:101219531|K15397 3-ketoacyl-CoA synthase [EC:2.3.1.199] | (RefSeq) 3-ketoacyl-CoA synthase 19	Fatty acid elongation (ko00062)	--	--	FAE1/Type III polyketide synthase-like protein;; 3-Oxoacyl-[acyl-carrier-protein (ACP)] synthase III C terminal;; Chalcone and stilbene synthases, C-terminal domain	3-ketoacyl-CoA synthase 2 OS=Arabidopsis thaliana OX=3702 GN=KCS2 PE=2 SV=2	PREDICTED: 3-ketoacyl-CoA synthase 19 [Cucumis sativus]
Csa3G144210	36.8444	34.099	55.0086	26.1665	46.3995	60.0587	11.4196	12.1015	20.5809	0.0875521	normal	-1.57446	down	-1.65213	down	[T]	Signal transduction mechanisms	Molecular Function: calcium ion binding (GO:0005509);; Biological Process: detection of calcium ion (GO:0005513);; Biological Process: response to mechanical stimulus (GO:0009612);; Biological Process: calcium-mediated signaling (GO:0019722);; Biological Process: actin filament-based movement (GO:0030048);; Molecular Function: 2-alkenal reductase [NAD(P)] activity (GO:0032440);; Biological Proces…	K13448|2.80748e-101|csv:101220878|K13448 calcium-binding protein CML | (RefSeq) calmodulin-like protein 11	Plant-pathogen interaction (ko04626)	[T]	Signal transduction mechanisms	EF hand;; EF-hand domain pair;; EF-hand domain;; EF-hand domain pair;; EF hand;; EF-hand domain;; Cytoskeletal-regulatory complex EF hand;; Secreted protein acidic and rich in cysteine Ca binding region;; EF-hand domain	Calmodulin-like protein 11 OS=Arabidopsis thaliana OX=3702 GN=CML11 PE=2 SV=1	PREDICTED: calmodulin-like protein 11 [Cucumis sativus]
Csa3G165080	33.053	27.7868	35.226	22.4072	24.9645	26.5569	11.8343	15.6769	12.6548	-0.346311	normal	-1.29704	down	-0.942583	down	[O]	Posttranslational modification, protein turnover, chaperones	--	--	--	--	--	DnaJ domain	Chaperone protein dnaJ 49 OS=Arabidopsis thaliana OX=3702 GN=ATJ49 PE=2 SV=2	PREDICTED: uncharacterized protein LOC101213407 [Cucumis sativus]
Csa3G171860	119.462	90.54	102.185	141.667	98.2444	119.718	45.7083	40.415	30.5318	0.214749	normal	-1.47951	down	-1.68723	down	--	--	Biological Process: defense response (GO:0006952);; Cellular Component: chloroplast (GO:0009507);; Biological Process: response to biotic stimulus (GO:0009607);; Biological Process: cellular cation homeostasis (GO:0030003);; Biological Process: response to stimulus (GO:0050896);; Biological Process: divalent metal ion transport (GO:0070838);;	--	--	--	--	Pathogenesis-related protein Bet v I family	MLP-like protein 31 OS=Arabidopsis thaliana OX=3702 GN=MLP31 PE=2 SV=2	PREDICTED: MLP-like protein 31 [Cucumis sativus]
Csa3G171870	259.165	188.079	227.687	293.12	214.688	238.605	101.882	107.506	71.9294	0.155368	normal	-1.32245	down	-1.47067	down	--	--	Biological Process: defense response (GO:0006952);; Cellular Component: chloroplast (GO:0009507);; Biological Process: response to biotic stimulus (GO:0009607);; Biological Process: cellular cation homeostasis (GO:0030003);; Biological Process: divalent metal ion transport (GO:0070838);;	--	--	--	--	Pathogenesis-related protein Bet v I family	MLP-like protein 43 OS=Arabidopsis thaliana OX=3702 GN=MLP43 PE=1 SV=1	PREDICTED: MLP-like protein 43 [Cucumis sativus]
Csa3G172920	52.8545	101.435	61.3143	53.8685	79.6858	60.7147	47.4355	47.526	35.6344	-0.127028	normal	-0.769678	down	-0.634593	down	[O]	Posttranslational modification, protein turnover, chaperones	Biological Process: protein peptidyl-prolyl isomerization (GO:0000413);; Molecular Function: peptidyl-prolyl cis-trans isomerase activity (GO:0003755);; Molecular Function: calmodulin binding (GO:0005516);; Cellular Component: vacuole (GO:0005773);; Cellular Component: cytosol (GO:0005829);; Biological Process: protein folding (GO:0006457);; Biological Process: N-terminal protein myristoylation (…	K09571|0|csv:101210041|K09571 FK506-binding protein 4/5 [EC:5.2.1.8] | (RefSeq) 70 kDa peptidyl-prolyl isomerase-like	--	[O]	Posttranslational modification, protein turnover, chaperones	FKBP-type peptidyl-prolyl cis-trans isomerase;; Tetratricopeptide repeat;; Tetratricopeptide repeat;; Tetratricopeptide repeat;; Tetratricopeptide repeat;; Tetratricopeptide repeat;; TPR repeat	Peptidyl-prolyl cis-trans isomerase FKBP65 OS=Arabidopsis thaliana OX=3702 GN=FKBP65 PE=1 SV=1	PREDICTED: 70 kDa peptidyl-prolyl isomerase-like [Cucumis sativus]
Csa3G178500	25.2588	37.291	34.4606	17.2208	28.9781	21.464	11.5132	17.5509	12.944	-0.499867	normal	-1.25721	down	-0.748275	down	[Q]	Secondary metabolites biosynthesis, transport and catabolism	Biological Process: fatty acid biosynthetic process (GO:0006633);; Biological Process: lipid biosynthetic process (GO:0008610);; Cellular Component: membrane (GO:0016020);; Molecular Function: transferase activity, transferring acyl groups (GO:0016746);; Molecular Function: transferase activity, transferring acyl groups other than amino-acyl groups (GO:0016747);;	K15397|0|csv:101215310|K15397 3-ketoacyl-CoA synthase [EC:2.3.1.199] | (RefSeq) 3-ketoacyl-CoA synthase 6-like	Fatty acid elongation (ko00062)	--	--	FAE1/Type III polyketide synthase-like protein;; 3-Oxoacyl-[acyl-carrier-protein (ACP)] synthase III C terminal;; Chalcone and stilbene synthases, C-terminal domain	3-ketoacyl-CoA synthase 6 OS=Arabidopsis thaliana OX=3702 GN=CUT1 PE=1 SV=1	PREDICTED: 3-ketoacyl-CoA synthase 6-like [Cucumis sativus]
Csa3G182110	115.94	87.4056	97.1133	81.0078	77.0068	79.5352	46.234	58.9085	50.5797	-0.334188	normal	-1.00348	down	-0.661721	down	--	--	Cellular Component: extracellular region (GO:0005576);; Cellular Component: endosome (GO:0005768);; Cellular Component: Golgi apparatus (GO:0005794);; Cellular Component: trans-Golgi network (GO:0005802);;	--	--	[R]	General function prediction only	Glycosyl transferase family 90	--	PREDICTED: protein O-glucosyltransferase 1-like [Cucumis sativus]
Csa3G183330	977.917	865.754	858.704	733.603	809.249	779.499	408.203	531.65	394.788	-0.206532	normal	-1.07008	down	-0.856019	down	--	--	Biological Process: embryo development ending in seed dormancy (GO:0009793);; Biological Process: trichome morphogenesis (GO:0010090);; Biological Process: cutin biosynthetic process (GO:0010143);; Molecular Function: anthranilate N-benzoyltransferase activity (GO:0047672);; Biological Process: epidermis morphogenesis (GO:0048730);; Biological Process: localization (GO:0051179);;	K19747|0|csv:101214239|K19747 BAHD acyltransferase [EC:2.3.1.-] | (RefSeq) BAHD acyltransferase DCR	--	--	--	Transferase family	BAHD acyltransferase DCR OS=Arabidopsis thaliana OX=3702 GN=DCR PE=2 SV=1	PREDICTED: BAHD acyltransferase DCR [Cucumis sativus]
Csa3G232960	34.6682	28.468	30.518	25.2434	27.6378	26.9178	18.6944	12.4539	19.8626	-0.220947	normal	-0.942566	down	-0.713287	down	--	--	Cellular Component: Golgi apparatus (GO:0005794);; Molecular Function: acetylglucosaminyltransferase activity (GO:0008375);; Cellular Component: integral component of membrane (GO:0016021);; Biological Process: carbohydrate biosynthetic process (GO:0016051);; Molecular Function: protein xylosyltransferase activity (GO:0030158);;	--	--	[G]	Carbohydrate transport and metabolism	Core-2/I-Branching enzyme	Beta-glucuronosyltransferase GlcAT14B OS=Arabidopsis thaliana OX=3702 GN=GLCAT14B PE=2 SV=1	PREDICTED: xylosyltransferase 1 [Cucumis sativus]
Csa3G238740	43.5151	32.3024	33.7893	30.0934	30.5705	30.8602	17.902	19.9895	19.0856	-0.246238	normal	-0.997833	down	-0.744133	down	--	--	--	--	--	--	--	--	Protein ABIL2 OS=Arabidopsis thaliana OX=3702 GN=ABIL2 PE=2 SV=1	hypothetical protein Csa_3G238740 [Cucumis sativus]
Csa3G331330	3.85796	7.33456	5.27195	7.23095	6.91059	5.03497	2.42402	1.59385	0.996048	0.242006	normal	-1.75351	down	-1.9879	down	--	--	--	--	--	--	--	Pathogenesis-related protein Bet v I family	MLP-like protein 28 OS=Arabidopsis thaliana OX=3702 GN=MLP28 PE=1 SV=1	PREDICTED: MLP-like protein 28 [Cucumis sativus]
Csa3G357110	16.8831	14.3166	10.9979	11.3563	11.6559	9.15662	5.36397	4.77694	5.57312	-0.380243	normal	-1.48435	down	-1.09637	down	--	--	Biological Process: cellular process (GO:0009987);; Biological Process: single-organism process (GO:0044699);;	--	--	--	--	AP2 domain	Ethylene-responsive transcription factor CRF4 OS=Arabidopsis thaliana OX=3702 GN=CRF4 PE=1 SV=2	PREDICTED: ethylene-responsive transcription factor CRF4 [Cucumis sativus]
Csa3G374190	40.3541	31.6119	32.0625	28.236	32.0866	29.3709	19.4337	18.4688	14.7674	-0.204639	normal	-1.04178	down	-0.829743	down	[K]	Transcription	Biological Process: response to molecule of bacterial origin (GO:0002237);; Biological Process: developmental process involved in reproduction (GO:0003006);; Molecular Function: protein binding (GO:0005515);; Cellular Component: nucleus (GO:0005634);; Biological Process: signal transduction (GO:0007165);; Biological Process: metabolic process (GO:0008152);; Biological Process: response to light s…	--	--	[R]	General function prediction only	Leucine rich repeat;; Leucine Rich repeats (2 copies);; Leucine Rich Repeat;; Leucine Rich repeat	Protein TOO MANY MOUTHS OS=Arabidopsis thaliana OX=3702 GN=TMM PE=1 SV=1	PREDICTED: piriformospora indica-insensitive protein 2 [Cucumis sativus]
Csa3G416660	9.89158	7.45897	9.08993	10.2295	11.23	10.2052	5.02742	7.14386	6.00451	0.270241	normal	-0.601532	down	-0.8633	down	[QV]	Secondary metabolites biosynthesis, transport and catabolism;; Defense mechanisms	Molecular Function: monooxygenase activity (GO:0004497);; Molecular Function: oxidoreductase activity, acting on paired donors, with incorporation or reduction of molecular oxygen (GO:0016705);; Molecular Function: metal ion binding (GO:0046872);;	--	--	[QI]	Secondary metabolites biosynthesis, transport and catabolism;; Lipid transport and metabolism	Cytochrome P450	Taxadiene 5-alpha hydroxylase OS=Taxus cuspidata OX=99806 PE=1 SV=2	PREDICTED: taxadiene 5-alpha hydroxylase-like [Cucumis sativus]
Csa3G417720	22.3389	22.9783	20.2995	21.4077	19.3359	21.1247	10.3293	12.5296	9.13117	-0.0717593	normal	-1.09025	down	-1.01102	down	--	--	--	--	--	--	--	--	--	hypothetical protein Csa_3G417720 [Cucumis sativus]
Csa3G457670	21.9879	20.5585	25.3545	15.2611	16.3442	22.8036	7.46906	9.12909	9.96995	-0.307334	normal	-1.41022	down	-1.09463	down	--	--	Molecular Function: binding (GO:0005488);;	--	--	[K]	Transcription	GATA zinc finger	GATA transcription factor 9 OS=Arabidopsis thaliana OX=3702 GN=GATA9 PE=2 SV=1	PREDICTED: GATA transcription factor 4-like [Cucumis sativus]
Csa3G556210	18.958	35.7923	26.5494	14.9602	36.6295	24.0622	17.3877	14.2358	16.8308	-0.0619151	normal	-0.809656	down	-0.738104	down	[I]	Lipid transport and metabolism	Biological Process: glycerol metabolic process (GO:0006071);; Biological Process: lipid metabolic process (GO:0006629);; Molecular Function: glycerophosphodiester phosphodiesterase activity (GO:0008889);; Cellular Component: plastid (GO:0009536);; Biological Process: cellular phosphate ion homeostasis (GO:0030643);; Biological Process: response to cadmium ion (GO:0046686);; Molecular Function: gl…	--	--	[R]	General function prediction only	Glycerophosphoryl diester phosphodiesterase family	Glycerophosphodiester phosphodiesterase GDPD1, chloroplastic OS=Arabidopsis thaliana OX=3702 GN=GDPD1 PE=1 SV=1	PREDICTED: glycerophosphodiester phosphodiesterase GDPD1, chloroplastic [Cucumis sativus]
Csa3G611330	66.7068	51.9328	57.7238	55.8723	56.7166	61.4689	37.1963	38.3085	34.2902	-0.00955303	normal	-0.744697	down	-0.727641	down	--	--	Cellular Component: endosome (GO:0005768);; Cellular Component: trans-Golgi network (GO:0005802);; Biological Process: unidimensional cell growth (GO:0009826);; Biological Process: salicylic acid mediated signaling pathway (GO:0009863);; Biological Process: xyloglucan biosynthetic process (GO:0009969);; Biological Process: endomembrane system organization (GO:0010256);; Molecular Function: transf…	K20888|0|csv:101204813|K20888 xyloglucan galactosyltransferase MUR3 [EC:2.4.1.-] | (RefSeq) xyloglucan galactosyltransferase KATAMARI1	--	[GMW]	Carbohydrate transport and metabolism;; Cell wall/membrane/envelope biogenesis;; Extracellular structures	Exostosin family	Xyloglucan galactosyltransferase MUR3 OS=Arabidopsis thaliana OX=3702 GN=MUR3 PE=1 SV=1	PREDICTED: xyloglucan galactosyltransferase KATAMARI1 [Cucumis sativus]
Csa3G698500	41.3317	24.1224	36.8401	27.9937	21.1612	30.4871	14.0738	13.2045	18.169	-0.351629	normal	-1.23584	down	-0.876088	down	[QV]	Secondary metabolites biosynthesis, transport and catabolism;; Defense mechanisms	Molecular Function: binding (GO:0005488);; Molecular Function: oxidoreductase activity (GO:0016491);;	--	--	[Q]	Secondary metabolites biosynthesis, transport and catabolism	Cytochrome P450	3,9-dihydroxypterocarpan 6A-monooxygenase OS=Glycine max OX=3847 GN=CYP93A1 PE=1 SV=1	hypothetical protein Csa_3G698500 [Cucumis sativus]
Csa3G698510	34.5484	20.4569	37.1872	23.5693	18.0922	29.119	13.0674	11.2109	14.4208	-0.37339	normal	-1.31617	down	-0.934735	down	--	--	Molecular Function: monooxygenase activity (GO:0004497);; Molecular Function: binding (GO:0005488);; Molecular Function: iron ion binding (GO:0005506);; Molecular Function: electron carrier activity (GO:0009055);; Molecular Function: oxidoreductase activity (GO:0016491);; Molecular Function: oxidoreductase activity, acting on paired donors, with incorporation or reduction of molecular oxygen (GO:…	--	--	[Q]	Secondary metabolites biosynthesis, transport and catabolism	Cytochrome P450	Cytochrome P450 705A5 OS=Arabidopsis thaliana OX=3702 GN=CYP705A5 PE=2 SV=1	hypothetical protein Csa_3G698510 [Cucumis sativus]
Csa3G730160	16.8199	12.8337	10.2281	12.859	11.6575	11.6687	7.09767	7.56022	4.49773	-0.131207	normal	-1.11556	down	-0.977611	down	--	--	Biological Process: cellular metabolic process (GO:0044237);;	--	--	--	--	Transcriptional repressor, ovate;; DNA-binding domain	Transcription repressor OFP4 OS=Arabidopsis thaliana OX=3702 GN=OFP4 PE=1 SV=1	PREDICTED: transcription repressor OFP2-like [Cucumis sativus]
Csa3G731160	8.11642	6.85933	8.66816	7.09668	10.0767	7.40339	1.02201	1.45186	1.75017	0.0697866	normal	-2.53504	down	-2.59537	down	[Q]	Secondary metabolites biosynthesis, transport and catabolism	Molecular Function: iron ion binding (GO:0005506);; Molecular Function: oxidoreductase activity, acting on paired donors, with incorporation or reduction of molecular oxygen, 2-oxoglutarate as one donor, and incorporation of one atom each of oxygen into both donors (GO:0016706);; Biological Process: oxidation-reduction process (GO:0055114);; Biological Process: response to karrikin (GO:0080167);;	--	--	[QR]	Secondary metabolites biosynthesis, transport and catabolism;; General function prediction only	2OG-Fe(II) oxygenase superfamily;; non-haem dioxygenase in morphine synthesis N-terminal	Probable 2-oxoglutarate-dependent dioxygenase At3g111800 OS=Arabidopsis thaliana OX=3702 GN=At3g11180 PE=2 SV=1	PREDICTED: leucoanthocyanidin dioxygenase-like [Cucumis sativus]
Csa3G733360	17.0997	10.9527	9.52994	11.9575	9.63195	10.3402	5.27006	5.41392	4.46164	-0.229893	normal	-1.3749	down	-1.13839	down	--	--	Biological Process: response to reactive oxygen species (GO:0000302);; Cellular Component: mitochondrion (GO:0005739);; Biological Process: photoperiodism (GO:0009648);; Cellular Component: chloroplast inner membrane (GO:0009706);; Biological Process: leaf development (GO:0048366);;	--	--	--	--	Protein RETICULATA-related	Protein RETICULATA-RELATED 1, chloroplastic OS=Arabidopsis thaliana OX=3702 GN=RER1 PE=1 SV=1	PREDICTED: uncharacterized protein LOC101202748 [Cucumis sativus]
Csa3G734860	389.533	291.463	340.327	237.614	249.673	276.054	88.8004	115.863	107.217	-0.411398	normal	-1.77318	down	-1.35407	down	[IQR]	Lipid transport and metabolism;; Secondary metabolites biosynthesis, transport and catabolism;; General function prediction only	Biological Process: pollen tube growth (GO:0009860);; Molecular Function: protochlorophyllide reductase activity (GO:0016630);; Biological Process: oxidation-reduction process (GO:0055114);;	--	--	[Q]	Secondary metabolites biosynthesis, transport and catabolism	short chain dehydrogenase;; Enoyl-(Acyl carrier protein) reductase;; KR domain;; NAD dependent epimerase/dehydratase family	Short-chain dehydrogenase TIC 32, chloroplastic OS=Arabidopsis thaliana OX=3702 GN=TIC32 PE=2 SV=1	PREDICTED: short-chain dehydrogenase TIC 32, chloroplastic [Cucumis sativus]
Csa3G734890	3.35213	4.44764	2.88471	2.288	2.71062	4.90812	1.40513	1.97176	1.48576	-0.103342	normal	-1.1785	down	-1.06874	down	--	--	--	--	--	--	--	--	--	hypothetical protein Csa_3G734890 [Cucumis sativus]
Csa3G740080	537.371	450.409	559.9	530.941	528.784	531.029	341.443	315.183	268.233	0.0518553	normal	-0.801713	down	-0.845604	down	[G]	Carbohydrate transport and metabolism	Molecular Function: adenosine kinase activity (GO:0004001);; Molecular Function: copper ion binding (GO:0005507);; Cellular Component: plasma membrane (GO:0005886);; Biological Process: purine ribonucleoside salvage (GO:0006166);; Biological Process: AMP biosynthetic process (GO:0006167);; Cellular Component: chloroplast (GO:0009507);; Biological Process: phosphorylation (GO:0016310);; Molecular …	K00856|0|csv:101218678|K00856 adenosine kinase [EC:2.7.1.20] | (RefSeq) adenosine kinase 2	Purine metabolism (ko00230)	[G]	Carbohydrate transport and metabolism	pfkB family carbohydrate kinase	Adenosine kinase 2 OS=Arabidopsis thaliana OX=3702 GN=ADK2 PE=1 SV=1	PREDICTED: adenosine kinase 2 [Cucumis sativus]
Csa3G741330	1.96268	3.75272	2.22215	3.32068	2.21452	2.43229	1.62997	1.35709	0.87866	0.0246934	normal	-1.08476	down	-1.10264	down	[G]	Carbohydrate transport and metabolism	Molecular Function: hydrolase activity, hydrolyzing O-glycosyl compounds (GO:0004553);; Cellular Component: cell wall (GO:0005618);; Biological Process: cellular glucan metabolic process (GO:0006073);; Molecular Function: xyloglucan:xyloglucosyl transferase activity (GO:0016762);; Biological Process: cell wall macromolecule catabolic process (GO:0016998);; Biological Process: cell wall biogenesis…	K08235|0|csv:101221682|K08235 xyloglucan:xyloglucosyl transferase [EC:2.4.1.207] | (RefSeq) probable xyloglucan endotransglucosylase/hydrolase protein 32	--	--	--	Glycosyl hydrolases family 16;; Xyloglucan endo-transglycosylase (XET) C-terminus	Probable xyloglucan endotransglucosylase/hydrolase protein 32 OS=Arabidopsis thaliana OX=3702 GN=XTH32 PE=2 SV=1	putative xyloglucan endotransglucosylase/hydrolase [Cucumis sativus]
Csa3G745000	5.44115	3.35842	3.75535	3.23915	2.99643	3.77225	2.40002	2.02895	1.89148	-0.318462	normal	-1.05323	down	-0.72758	down	--	--	Biological Process: metabolic process (GO:0008152);; Molecular Function: transferase activity, transferring glycosyl groups (GO:0016757);; Molecular Function: UDP-glucosyltransferase activity (GO:0035251);;	K13496|0|csv:101218679|K13496 UDP-glucosyl transferase 73C [EC:2.4.1.-] | (RefSeq) anthocyanidin 3-O-glucosyltransferase 4-like	--	[GC]	Carbohydrate transport and metabolism;; Energy production and conversion	UDP-glucoronosyl and UDP-glucosyl transferase	UDP-glycosyltransferase 73C1 OS=Arabidopsis thaliana OX=3702 GN=UGT73C1 PE=2 SV=1	hypothetical protein Csa_3G745000 [Cucumis sativus]
Csa3G748180	1.00502	1.56881	0.970942	0.837902	1.15849	1.08472	0.385429	0.366951	0.477546	-0.178356	normal	-1.56404	down	-1.37811	down	--	--	Molecular Function: catalytic activity (GO:0003824);;	--	--	--	--	--	--	PREDICTED: interaptin [Cucumis sativus]
Csa3G748220	185.084	162.343	155.11	151.841	152.738	134.676	80.6458	79.4142	73.2572	-0.182432	normal	-1.1669	down	-0.976782	down	--	--	Molecular Function: transcription regulatory region sequence-specific DNA binding (GO:0000976);; Molecular Function: transcription factor activity, sequence-specific DNA binding (GO:0003700);; Cellular Component: nucleus (GO:0005634);; Biological Process: regulation of transcription, DNA-templated (GO:0006355);; Molecular Function: sequence-specific DNA binding (GO:0043565);; Biological Process: …	--	--	[K]	Transcription	Homeobox domain;; Homeobox associated leucine zipper;; Homeobox KN domain	Putative homeobox-leucine zipper protein ATHB-51 OS=Arabidopsis thaliana OX=3702 GN=ATHB-51 PE=2 SV=2	PREDICTED: homeobox-leucine zipper protein ATHB-22-like isoform X1 [Cucumis melo]
Csa3G777680	9.21955	5.8842	4.69396	8.05337	5.56715	2.64116	1.90292	1.85948	1.25758	-0.273603	normal	-2.0371	down	-1.75701	down	--	--	--	--	--	--	--	--	Probable F-box protein At2g36090 OS=Arabidopsis thaliana OX=3702 GN=At2g36090 PE=2 SV=1	PREDICTED: probable F-box protein At1g60180 [Cucumis sativus]
Csa3G778210	21.2285	17.7683	17.2809	18.2126	16.7675	16.6735	9.82769	10.429	8.1923	-0.112042	normal	-1.04261	down	-0.923097	down	--	--	Molecular Function: carboxypeptidase activity (GO:0004180);; Biological Process: proteolysis (GO:0006508);; Molecular Function: serine-type peptidase activity (GO:0008236);; Cellular Component: cytoplasmic vesicle (GO:0016023);;	K01285|0|csv:101203128|K01285 lysosomal Pro-X carboxypeptidase [EC:3.4.16.2] | (RefSeq) lysosomal Pro-X carboxypeptidase-like	--	[OR]	Posttranslational modification, protein turnover, chaperones;; General function prediction only	Serine carboxypeptidase S28	Probable serine protease EDA2 OS=Arabidopsis thaliana OX=3702 GN=EDA2 PE=2 SV=2	PREDICTED: lysosomal Pro-X carboxypeptidase-like [Cucumis sativus]
Csa3G780530	5.15249	3.93048	5.6093	5.65204	4.4569	6.18893	1.71288	2.08566	2.6073	0.164654	normal	-1.25586	down	-1.41178	down	--	--	--	--	--	--	--	--	--	hypothetical protein Csa_3G780530 [Cucumis sativus]
Csa3G806800	69.9322	53.3894	64.2262	67.0732	71.5939	77.8179	30.7982	43.1481	41.1517	0.21653	normal	-0.765667	down	-0.974165	down	[Z]	Cytoskeleton	Molecular Function: ATP binding (GO:0005524);; Cellular Component: cell wall (GO:0005618);; Cellular Component: nucleus (GO:0005634);; Cellular Component: cytoplasm (GO:0005737);; Cellular Component: cytoskeleton (GO:0005856);; Cellular Component: plasma membrane (GO:0005886);; Biological Process: root hair elongation (GO:0048767);;	K10355|0|pxb:103958921|K10355 actin, other eukaryote | (RefSeq) actin-like	--	[Z]	Cytoskeleton	Actin	Actin OS=Gossypium hirsutum OX=3635 PE=3 SV=1	PREDICTED: actin [Cucumis sativus]
Csa3G821040	5.87883	2.62952	5.37699	3.09223	3.74371	4.23934	2.08802	2.27001	1.99034	-0.321118	normal	-1.18825	down	-0.858733	down	--	--	Biological Process: positive regulation of cell proliferation (GO:0008284);; Biological Process: cellular response to auxin stimulus (GO:0071365);;	--	--	--	--	--	--	hypothetical protein Csa_3G821040 [Cucumis sativus]
Csa3G822510	75.1089	58.1248	67.652	67.4575	70.4536	74.8179	47.6605	48.4714	42.2147	0.0569436	normal	-0.612066	down	-0.661407	down	--	--	Molecular Function: DNA binding (GO:0003677);; Molecular Function: DNA topoisomerase type II (ATP-hydrolyzing) activity (GO:0003918);; Molecular Function: ATP binding (GO:0005524);; Cellular Component: chromosome (GO:0005694);; Cellular Component: plasma membrane (GO:0005886);; Biological Process: DNA topological change (GO:0006265);; Biological Process: purine nucleobase transport (GO:0006863);;…	--	--	[GE]	Carbohydrate transport and metabolism;; Amino acid transport and metabolism	Triose-phosphate Transporter family;; UAA transporter family;; EamA-like transporter family	Probable sugar phosphate/phosphate translocator At3g10290 OS=Arabidopsis thaliana OX=3702 GN=At3g10290 PE=3 SV=1	PREDICTED: probable sugar phosphate/phosphate translocator At5g04160 [Cucumis sativus]
Csa3G824850	157.379	123.917	140.668	153.388	145.624	145.886	73.8318	87.5735	85.631	0.0869033	normal	-0.833733	down	-0.912673	down	--	--	Molecular Function: DNA binding (GO:0003677);; Molecular Function: chromatin binding (GO:0003682);; Molecular Function: transcription factor activity, sequence-specific DNA binding (GO:0003700);; Cellular Component: nucleus (GO:0005634);; Biological Process: regulation of transcription, DNA-templated (GO:0006355);; Biological Process: response to salt stress (GO:0009651);; Biological Process: res…	K09422|1.12229e-141|csv:101212616|K09422 myb proto-oncogene protein, plant | (RefSeq) transcription factor MYB76	--	[K]	Transcription	Myb-like DNA-binding domain;; Myb-like DNA-binding domain	Transcription factor MYB106 OS=Arabidopsis thaliana OX=3702 GN=MYB106 PE=2 SV=1	PREDICTED: transcription factor MYB76 [Cucumis sativus]
Csa3G826650	1028.81	836.355	1057.94	866.901	892.269	990.25	499.663	520.763	508.369	-0.0772334	normal	-0.995325	down	-0.910008	down	[G]	Carbohydrate transport and metabolism	Molecular Function: silicate transmembrane transporter activity (GO:0015115);; Biological Process: silicate transport (GO:0015708);; Cellular Component: integral component of membrane (GO:0016021);; Cellular Component: Casparian strip (GO:0048226);;	K09874|1.99475e-180|csv:101205456|K09874 aquaporin NIP | (RefSeq) aquaporin NIP2-1-like	--	[G]	Carbohydrate transport and metabolism	Major intrinsic protein	Aquaporin NIP2-1 OS=Zea mays OX=4577 GN=NIP2-1 PE=2 SV=2	hypothetical protein Csa_3G826650 [Cucumis sativus]
Csa3G829130	1.2815	0.986122	5.27174	1.36689	1.42952	3.55813	1.14388	0.854291	1.39878	-0.227043	normal	-1.19888	down	-0.959731	down	[E]	Amino acid transport and metabolism	Cellular Component: plasma membrane (GO:0005886);; Biological Process: ion transport (GO:0006811);; Biological Process: oligopeptide transport (GO:0006857);; Biological Process: response to nematode (GO:0009624);; Molecular Function: ion transmembrane transporter activity (GO:0015075);; Molecular Function: amino acid transmembrane transporter activity (GO:0015171);; Cellular Component: membrane (…	--	--	[E]	Amino acid transport and metabolism	POT family;; Major Facilitator Superfamily	Protein NRT1/ PTR FAMILY 5.8 OS=Arabidopsis thaliana OX=3702 GN=NPF5.8 PE=2 SV=1	PREDICTED: protein NRT1/ PTR FAMILY 5.8-like [Cucumis sativus]
Csa3G829250	22.3974	14.647	20.0092	10.9894	13.5931	16.691	1.72962	3.2332	1.81847	-0.460776	normal	-3.12856	down	-2.66044	down	[Q]	Secondary metabolites biosynthesis, transport and catabolism	Biological Process: fatty acid alpha-oxidation (GO:0001561);; Molecular Function: peroxidase activity (GO:0004601);; Biological Process: iron ion transport (GO:0006826);; Biological Process: response to oxidative stress (GO:0006979);; Biological Process: cell death (GO:0008219);; Biological Process: systemic acquired resistance (GO:0009627);; Biological Process: response to abscisic acid (GO:0009…	K10529|0|csv:101218631|K10529 alpha-dioxygenase [EC:1.-.-.-] | (RefSeq) alpha-dioxygenase 1-like	alpha-Linolenic acid metabolism (ko00592)	[R]	General function prediction only	Animal haem peroxidase	Alpha-dioxygenase 1 OS=Arabidopsis thaliana OX=3702 GN=DOX1 PE=1 SV=1	PREDICTED: alpha-dioxygenase 1-like [Cucumis sativus]
Csa3G840350	92.3699	71.4884	84.7858	67.4588	64.8394	79.6024	46.1304	45.8638	48.0193	-0.22344	normal	-0.894238	down	-0.663142	down	[M]	Cell wall/membrane/envelope biogenesis	Molecular Function: protein serine/threonine kinase activity (GO:0004674);; Molecular Function: protein tyrosine kinase activity (GO:0004713);; Molecular Function: ATP binding (GO:0005524);; Biological Process: protein phosphorylation (GO:0006468);; Cellular Component: intracellular part (GO:0044424);; Biological Process: single-organism cellular process (GO:0044763);;	--	--	[R]	General function prediction only	Protein kinase domain;; Protein tyrosine kinase	Protein kinase PVPK-1 OS=Phaseolus vulgaris OX=3885 PE=2 SV=1	PREDICTED: protein kinase PVPK-1 [Cucumis sativus]
Csa3G852480	5.82344	3.94198	4.81149	6.22721	4.87765	4.58507	1.9821	2.62635	1.4857	0.112174	normal	-1.31936	down	-1.4235	down	[G]	Carbohydrate transport and metabolism	Biological Process: metabolic process (GO:0008152);; Molecular Function: hydrolase activity, acting on glycosyl bonds (GO:0016798);; Biological Process: organic substance metabolic process (GO:0071704);;	K05350|0|csv:101215621|K05350 beta-glucosidase [EC:3.2.1.21] | (RefSeq) beta-glucosidase 18-like	Cyanoamino acid metabolism (ko00460);; Starch and sucrose metabolism (ko00500);; Phenylpropanoid biosynthesis (ko00940)	[G]	Carbohydrate transport and metabolism	Glycosyl hydrolase family 1	Beta-glucosidase 18 OS=Oryza sativa subsp. japonica OX=39947 GN=BGLU18 PE=3 SV=2	hypothetical protein Csa_3G852480 [Cucumis sativus]
Csa3G857050	2.42714	2.09631	2.02387	1.63775	2.06807	2.58619	1.06764	0.887751	1.0296	-0.0368896	normal	-1.18159	down	-1.13732	down	[G]	Carbohydrate transport and metabolism	Molecular Function: sugar:proton symporter activity (GO:0005351);; Cellular Component: Golgi apparatus (GO:0005794);; Cellular Component: plasma membrane (GO:0005886);; Biological Process: jasmonic acid metabolic process (GO:0009694);; Cellular Component: plant-type vacuole membrane (GO:0009705);; Biological Process: response to jasmonic acid (GO:0009753);; Biological Process: positive regulation…	K08145|0|csv:101203175|K08145 MFS transporter, SP family, solute carrier family 2 (facilitated glucose transporter), member 8 | (RefSeq) sugar transporter ERD6-like 6	--	[R]	General function prediction only	Sugar (and other) transporter;; Major Facilitator Superfamily	Sugar transporter ERD6-like 6 OS=Arabidopsis thaliana OX=3702 GN=At1g75220 PE=1 SV=1	PREDICTED: sugar transporter ERD6-like 6 [Cucumis sativus]
Csa3G859730	34.9188	32.6068	31.1918	45.1652	37.3219	28.012	21.8853	21.7282	14.9451	0.177798	normal	-0.809802	down	-0.979948	down	[I]	Lipid transport and metabolism	Cellular Component: nucleus (GO:0005634);; Cellular Component: cytoplasm (GO:0005737);; Biological Process: protein targeting to membrane (GO:0006612);; Biological Process: response to stress (GO:0006950);; Molecular Function: S-adenosylmethionine-dependent methyltransferase activity (GO:0008757);; Biological Process: response to water deprivation (GO:0009414);; Biological Process: response to wo…	K08241|0|csv:101220850|K08241 jasmonate O-methyltransferase [EC:2.1.1.141] | (RefSeq) jasmonate O-methyltransferase	alpha-Linolenic acid metabolism (ko00592)	--	--	SAM dependent carboxyl methyltransferase	Jasmonate O-methyltransferase OS=Arabidopsis thaliana OX=3702 GN=JMT PE=1 SV=3	PREDICTED: jasmonate O-methyltransferase [Cucumis sativus]
Csa3G881610	20.4646	18.8648	17.4737	16.4318	16.9009	18.8682	12.548	11.2176	12.3309	-0.10303	normal	-0.706479	down	-0.595797	down	--	--	Cellular Component: extracellular region (GO:0005576);; Cellular Component: plasma membrane (GO:0005886);;	--	--	--	--	Protein of unknown function (DUF1218)	--	PREDICTED: uncharacterized protein LOC101222453 [Cucumis sativus]
Csa3G881700	7.91399	7.22922	5.78157	4.7167	4.01891	7.21547	3.08208	2.39081	3.808	-0.379935	normal	-1.23571	down	-0.848739	down	--	--	Biological Process: very long-chain fatty acid metabolic process (GO:0000038);; Molecular Function: catalytic activity (GO:0003824);; Cellular Component: nucleus (GO:0005634);; Cellular Component: mitochondrion (GO:0005739);; Cellular Component: plasma membrane (GO:0005886);; Biological Process: cuticle hydrocarbon biosynthetic process (GO:0006723);; Biological Process: post-embryonic development…	--	--	--	--	--	Flowering-promoting factor 1-like protein 1 OS=Arabidopsis thaliana OX=3702 GN=FLP1 PE=2 SV=2	PREDICTED: flowering-promoting factor 1-like protein 2 [Cucumis sativus]
Csa3G889780	101.273	83.1648	92.1476	89.5738	100.649	116.181	46.4146	60.8127	49.0234	0.15744	normal	-0.883223	down	-1.03314	down	--	--	Cellular Component: plant-type cell wall (GO:0009505);; Biological Process: response to brassinosteroid (GO:0009741);;	--	--	--	--	Phosphate-induced protein 1 conserved region	Protein EXORDIUM-like 1 OS=Arabidopsis thaliana OX=3702 GN=EXL1 PE=2 SV=1	PREDICTED: protein EXORDIUM-like 1 [Cucumis sativus]
Csa3G889850	3.59638	3.34918	3.02922	2.27916	2.43748	2.62774	0.956011	1.12349	0.704667	-0.424187	normal	-1.89096	down	-1.45959	down	--	--	Cellular Component: nucleosome (GO:0000786);; Molecular Function: DNA binding (GO:0003677);; Cellular Component: nucleus (GO:0005634);; Biological Process: nucleosome assembly (GO:0006334);; Molecular Function: protein heterodimerization activity (GO:0046982);;	--	--	--	--	GDP-fucose protein O-fucosyltransferase	O-fucosyltransferase 7 OS=Arabidopsis thaliana OX=3702 GN=OFUT7 PE=2 SV=1	PREDICTED: uncharacterized protein At1g04910-like isoform X2 [Cucumis sativus]
Csa3G902310	12.6829	14.2678	13.6621	8.49829	8.91914	12.7351	4.33689	5.28243	5.74929	-0.416145	normal	-1.45709	down	-1.03315	down	--	--	Molecular Function: receptor activity (GO:0004872);; Cellular Component: nucleus (GO:0005634);; Biological Process: tryptophan catabolic process (GO:0006569);; Biological Process: indoleacetic acid biosynthetic process (GO:0009684);; Biological Process: abscisic acid-activated signaling pathway (GO:0009738);; Molecular Function: abscisic acid binding (GO:0010427);; Biological Process: glucosinola…	K14496|3.08658e-143|csv:101218875|K14496 abscisic acid receptor PYR/PYL family | (RefSeq) abscisic acid receptor PYR1-like	Plant hormone signal transduction (ko04075)	--	--	Polyketide cyclase / dehydrase and lipid transport;; Polyketide cyclase / dehydrase and lipid transport	Abscisic acid receptor PYR1 OS=Arabidopsis thaliana OX=3702 GN=PYR1 PE=1 SV=1	PREDICTED: abscisic acid receptor PYR1-like [Cucumis sativus]
Csa3G902360	13.0465	12.5552	12.7571	8.58518	8.9213	10.0794	5.5869	6.06154	5.23587	-0.514621	normal	-1.32258	down	-0.800542	down	--	--	Molecular Function: transporter activity (GO:0005215);; Cellular Component: mitochondrion (GO:0005739);; Cellular Component: mitochondrial inner membrane (GO:0005743);; Biological Process: mitochondrial transport (GO:0006839);; Cellular Component: chloroplast (GO:0009507);; Biological Process: ornithine transport (GO:0015822);; Cellular Component: integral component of membrane (GO:0016021);; Bio…	K15109|0|csv:101219593|K15109 solute carrier family 25 (mitochondrial carnitine/acylcarnitine transporter), member 20/29 | (RefSeq) mitochondrial carnitine/acylcarnitine carrier-like protein	--	[C]	Energy production and conversion	Mitochondrial carrier protein	Mitochondrial carnitine/acylcarnitine carrier-like protein OS=Arabidopsis thaliana OX=3702 GN=BOU PE=1 SV=1	hypothetical protein Csa_3G902360 [Cucumis sativus]
Csa3G902380	16.7992	16.3064	23.2973	17.7172	17.2494	17.1548	9.25048	9.98534	13.0729	-0.0981521	normal	-0.861824	down	-0.754118	down	--	--	Biological Process: response to brassinosteroid (GO:0009741);;	--	--	--	--	--	--	PREDICTED: uncharacterized protein LOC105435042 [Cucumis sativus]
Csa4G000830	27.9738	26.0865	34.1271	23.0382	23.8485	27.3238	14.5099	11.865	14.3588	-0.234475	normal	-1.17017	down	-0.927047	down	--	--	--	--	--	--	--	--	--	hypothetical protein Csa_4G000830 [Cucumis sativus]
Csa4G001890	117.764	110.166	81.2547	80.3161	75.3198	65.9572	29.9023	28.4175	17.5923	-0.469011	normal	-2.08265	down	-1.60704	down	[HR]	Coenzyme transport and metabolism;; General function prediction only	Molecular Function: epoxide hydrolase activity (GO:0004301);; Cellular Component: peroxisome (GO:0005777);; Cellular Component: cytosol (GO:0005829);; Biological Process: metabolic process (GO:0008152);; Molecular Function: transferase activity (GO:0016740);;	--	--	[I]	Lipid transport and metabolism	alpha/beta hydrolase fold;; Alpha/beta hydrolase family;; Serine aminopeptidase, S33	--	PREDICTED: bifunctional epoxide hydrolase 2-like [Cucumis sativus]
Csa4G001910	78.3948	72.8552	83.2093	64.0988	72.5523	69.9502	26.0729	36.3385	40.5979	-0.169041	normal	-1.24576	down	-1.06793	down	[HR]	Coenzyme transport and metabolism;; General function prediction only	Molecular Function: epoxide hydrolase activity (GO:0004301);; Cellular Component: peroxisome (GO:0005777);; Cellular Component: cytosol (GO:0005829);; Molecular Function: transferase activity (GO:0016740);;	--	--	[I]	Lipid transport and metabolism	alpha/beta hydrolase fold;; Alpha/beta hydrolase family;; Serine aminopeptidase, S33	Proline iminopeptidase OS=Arabidopsis thaliana OX=3702 GN=PIP PE=2 SV=3	PREDICTED: bifunctional epoxide hydrolase 2-like [Cucumis sativus]
Csa4G001920	29.9351	27.7331	26.7407	29.429	28.924	24.822	16.9761	18.3937	19.4366	-0.00767031	normal	-0.682447	down	-0.666587	down	[HR]	Coenzyme transport and metabolism;; General function prediction only	Molecular Function: epoxide hydrolase activity (GO:0004301);; Molecular Function: non-membrane spanning protein tyrosine kinase activity (GO:0004715);; Cellular Component: peroxisome (GO:0005777);; Cellular Component: cytosol (GO:0005829);; Biological Process: metabolic process (GO:0008152);;	--	--	[I]	Lipid transport and metabolism	Alpha/beta hydrolase family;; alpha/beta hydrolase fold;; Serine aminopeptidase, S33	--	PREDICTED: bifunctional epoxide hydrolase 2-like isoform X1 [Cucumis sativus]
Csa4G001970	1.48854	2.13422	1.72082	1.02132	2.27806	1.79865	0.583203	0.697887	0.725139	-0.0506695	normal	-1.44628	down	-1.38692	down	--	--	Molecular Function: DNA binding (GO:0003677);; Molecular Function: transcription factor activity, sequence-specific DNA binding (GO:0003700);; Cellular Component: nucleus (GO:0005634);; Biological Process: regulation of transcription, DNA-templated (GO:0006355);;	K09286|0|csv:101203357|K09286 EREBP-like factor | (RefSeq) ethylene-responsive transcription factor ERF073-like	--	--	--	AP2 domain	Ethylene-responsive transcription factor RAP2-3 OS=Arabidopsis thaliana OX=3702 GN=RAP2-3 PE=1 SV=2	PREDICTED: ethylene-responsive transcription factor ERF073-like [Cucumis sativus]
Csa4G002530	26.0486	23.6275	28.0888	25.7505	25.7765	27.6337	25.0922	9.80665	8.95356	0.0309265	normal	-0.938746	down	-0.962693	down	[M]	Cell wall/membrane/envelope biogenesis	Cellular Component: Golgi apparatus (GO:0005794);; Cellular Component: cytoplasmic vesicle (GO:0016023);; Biological Process: carbohydrate biosynthetic process (GO:0016051);; Molecular Function: polygalacturonate 4-alpha-galacturonosyltransferase activity (GO:0047262);;	--	--	--	--	Glycosyl transferase family 8	Probable galacturonosyltransferase-like 7 OS=Arabidopsis thaliana OX=3702 GN=GATL7 PE=2 SV=1	PREDICTED: probable galacturonosyltransferase-like 7 [Cucumis sativus]
Csa4G006100	13.7948	7.1202	12.8921	7.12908	7.13229	7.76736	0.602845	3.04549	0.396214	-0.578448	normal	-3.477	down	-2.89154	down	[I]	Lipid transport and metabolism	Biological Process: long-chain fatty acid metabolic process (GO:0001676);; Biological Process: defense response to insect (GO:0002213);; Molecular Function: stearoyl-CoA 9-desaturase activity (GO:0004768);; Biological Process: unsaturated fatty acid biosynthetic process (GO:0006636);; Biological Process: phosphatidylglycerol biosynthetic process (GO:0006655);; Cellular Component: chloroplast (GO:…	K20416|2.13768e-66|csv:101209735|K20416 palmitoyl-[glycerolipid] 7-desaturase [EC:1.14.19.42] | (RefSeq) palmitoyl-monogalactosyldiacylglycerol delta-7 desaturase, chloroplastic-like	--	[I]	Lipid transport and metabolism	Fatty acid desaturase	Palmitoyl-monogalactosyldiacylglycerol delta-7 desaturase, chloroplastic OS=Arabidopsis thaliana OX=3702 GN=ADS3 PE=1 SV=2	hypothetical protein Csa_4G006100 [Cucumis sativus]
Csa4G006120	17.0907	14.7985	14.0139	10.7243	9.82746	12.1848	1.41021	0	1.93933	-0.476637	normal	-3.84242	down	-3.35624	down	[I]	Lipid transport and metabolism	Biological Process: lipid metabolic process (GO:0006629);; Biological Process: fatty acid biosynthetic process (GO:0006633);; Biological Process: isoprenoid biosynthetic process (GO:0008299);; Biological Process: phospholipid biosynthetic process (GO:0008654);; Molecular Function: oxidoreductase activity, acting on paired donors, with oxidation of a pair of donors resulting in the reduction of mo…	K20416|0|csv:101209490|K20416 palmitoyl-[glycerolipid] 7-desaturase [EC:1.14.19.42] | (RefSeq) palmitoyl-monogalactosyldiacylglycerol delta-7 desaturase, chloroplastic-like	--	[I]	Lipid transport and metabolism	Fatty acid desaturase	Palmitoyl-monogalactosyldiacylglycerol delta-7 desaturase, chloroplastic OS=Arabidopsis thaliana OX=3702 GN=ADS3 PE=1 SV=2	PREDICTED: palmitoyl-monogalactosyldiacylglycerol delta-7 desaturase, chloroplastic-like [Cucumis sativus]
Csa4G006140	2279.62	2045.22	1536.96	2103.86	1822.36	1648.77	1210.98	1258.17	791.107	-0.0616747	normal	-0.904933	down	-0.836811	down	[I]	Lipid transport and metabolism	Biological Process: long-chain fatty acid metabolic process (GO:0001676);; Biological Process: defense response to insect (GO:0002213);; Biological Process: fatty acid biosynthetic process (GO:0006633);; Biological Process: unsaturated fatty acid biosynthetic process (GO:0006636);; Biological Process: phosphatidylglycerol biosynthetic process (GO:0006655);; Biological Process: isoprenoid biosynth…	K20416|0|csv:101208999|K20416 palmitoyl-[glycerolipid] 7-desaturase [EC:1.14.19.42] | (RefSeq) palmitoyl-monogalactosyldiacylglycerol delta-7 desaturase, chloroplastic-like	--	[I]	Lipid transport and metabolism	Fatty acid desaturase	Palmitoyl-monogalactosyldiacylglycerol delta-7 desaturase, chloroplastic OS=Arabidopsis thaliana OX=3702 GN=ADS3 PE=1 SV=2	PREDICTED: palmitoyl-monogalactosyldiacylglycerol delta-7 desaturase, chloroplastic-like [Cucumis sativus]
Csa4G012500	20.5744	23.7673	27.2708	18.6836	18.7945	22.0173	10.2619	8.17386	9.38224	-0.250276	normal	-1.41871	down	-1.16004	down	[V]	Defense mechanisms	--	K16904|1.28099e-99|csv:101213795|K16904 dCTP diphosphatase [EC:3.6.1.12] | (RefSeq) dCTP pyrophosphatase 1-like	Pyrimidine metabolism (ko00240)	--	--	MazG-like family;; MazG nucleotide pyrophosphohydrolase domain	--	PREDICTED: dCTP pyrophosphatase 1-like [Cucumis sativus]
Csa4G016510	13.6244	9.54736	7.77924	8.18995	6.23846	7.98991	1.63578	2.8897	1.58519	-0.459471	normal	-2.39514	down	-1.92923	down	--	--	Molecular Function: transferase activity, transferring acyl groups other than amino-acyl groups (GO:0016747);;	--	--	--	--	Transferase family	Salutaridinol 7-O-acetyltransferase OS=Papaver somniferum OX=3469 GN=SALAT PE=1 SV=1	PREDICTED: salutaridinol 7-O-acetyltransferase-like [Cucumis sativus]
Csa4G031010	1.55436	0.699215	0.982714	0.892138	0.979959	0.829504	0.276669	0.243499	0.13158	-0.252193	normal	-2.32316	down	-2.06188	down	[P]	Inorganic ion transport and metabolism	Molecular Function: secondary active sulfate transmembrane transporter activity (GO:0008271);; Biological Process: sulfate transport (GO:0008272);; Biological Process: indoleacetic acid biosynthetic process (GO:0009684);; Cellular Component: integral component of membrane (GO:0016021);; Biological Process: cysteine biosynthetic process (GO:0019344);; Biological Process: glucosinolate biosynthetic…	K17469|0|csv:101213063|K17469 sulfate transporter 2, low-affinity | (RefSeq) low affinity sulfate transporter 3-like	--	[P]	Inorganic ion transport and metabolism	Sulfate permease family;; STAS domain	Low affinity sulfate transporter 3 OS=Stylosanthes hamata OX=37660 GN=ST3 PE=2 SV=1	PREDICTED: low affinity sulfate transporter 3-like [Cucumis sativus]
Csa4G038620	13.2549	9.36863	9.40544	7.51225	7.41612	11.7358	5.92755	4.48911	4.90953	-0.259151	normal	-1.12575	down	-0.860134	down	[G]	Carbohydrate transport and metabolism	Molecular Function: transferase activity (GO:0016740);; Molecular Function: transferase activity, transferring glycosyl groups (GO:0016757);;	K12356|0|csv:101214511|K12356 coniferyl-alcohol glucosyltransferase [EC:2.4.1.111] | (RefSeq) anthocyanidin 3-O-glucosyltransferase 5-like	Phenylpropanoid biosynthesis (ko00940)	[GC]	Carbohydrate transport and metabolism;; Energy production and conversion	UDP-glucoronosyl and UDP-glucosyl transferase	Anthocyanidin 3-O-glucosyltransferase 5 OS=Manihot esculenta OX=3983 GN=GT5 PE=2 SV=1	PREDICTED: anthocyanidin 3-O-glucosyltransferase 5-like [Cucumis sativus]
Csa4G047890	12.8396	10.7509	15.5921	7.90155	12.0486	14.9645	6.87175	5.76456	6.9951	-0.154766	normal	-1.05551	down	-0.892308	down	--	--	--	--	--	--	--	Domain of unknown function (DUF4228)	--	PREDICTED: uncharacterized protein LOC101218947 [Cucumis sativus]
Csa4G050260	2.99007	2.58574	3.72377	2.41596	3.63782	2.17001	1.02201	1.69009	1.80596	-0.162584	normal	-1.09817	down	-0.925406	down	[T]	Signal transduction mechanisms	Cellular Component: late endosome (GO:0005770);; Biological Process: regulation of pH (GO:0006885);; Cellular Component: chloroplast (GO:0009507);; Molecular Function: sodium:proton antiporter activity (GO:0015385);; Cellular Component: integral component of membrane (GO:0016021);; Biological Process: sodium ion transmembrane transport (GO:0035725);;	--	--	[P]	Inorganic ion transport and metabolism	Sodium/hydrogen exchanger family	Cation/H(+) antiporter 18 OS=Arabidopsis thaliana OX=3702 GN=CHX18 PE=2 SV=1	PREDICTED: cation/H(+) antiporter 18-like [Cucumis sativus]
Csa4G051550	279.11	207.023	272.97	229.497	240.83	250.38	113.936	157.266	135.082	-0.063451	normal	-0.964669	down	-0.893151	down	[I]	Lipid transport and metabolism	Cellular Component: plasma membrane (GO:0005886);; Biological Process: metabolic process (GO:0008152);; Molecular Function: ligase activity (GO:0016874);;	K01897|0|csv:101202800|K01897 long-chain acyl-CoA synthetase [EC:6.2.1.3] | (RefSeq) long chain acyl-CoA synthetase 4-like	Fatty acid biosynthesis (ko00061);; Fatty acid degradation (ko00071);; Fatty acid metabolism (ko01212);; Peroxisome (ko04146)	[I]	Lipid transport and metabolism	AMP-binding enzyme	Long chain acyl-CoA synthetase 4 OS=Arabidopsis thaliana OX=3702 GN=LACS4 PE=2 SV=1	PREDICTED: long chain acyl-CoA synthetase 4-like [Cucumis sativus]
Csa4G052740	60.1228	55.0228	58.1401	40.2839	41.9429	40.9897	27.6288	29.8895	25.8275	-0.479194	normal	-1.11396	down	-0.626874	down	--	--	Molecular Function: binding (GO:0005488);; Biological Process: transcription, DNA-templated (GO:0006351);; Biological Process: response to hormone (GO:0009725);; Biological Process: regulation of cellular process (GO:0050794);;	K14486|0|csv:101213942|K14486 auxin response factor | (RefSeq) auxin response factor 9	Plant hormone signal transduction (ko04075)	--	--	Auxin response factor;; B3 DNA binding domain;; AUX/IAA family	Auxin response factor 9 OS=Arabidopsis thaliana OX=3702 GN=ARF9 PE=1 SV=1	PREDICTED: auxin response factor 9 [Cucumis sativus]
Csa4G063460	8.5898	8.24399	8.97634	6.02122	5.86939	8.15994	2.663	3.54512	3.37589	-0.386037	normal	-1.48282	down	-1.08888	down	--	--	Biological Process: response to carbohydrate (GO:0009743);; Biological Process: hemicellulose metabolic process (GO:0010410);; Molecular Function: transferase activity, transferring glycosyl groups (GO:0016757);; Biological Process: cell wall biogenesis (GO:0042546);; Biological Process: single-organism carbohydrate metabolic process (GO:0044723);;	K13681|0|csv:101222105|K13681 xyloglucan fucosyltransferase [EC:2.4.1.-] | (RefSeq) probable fucosyltransferase 8	--	--	--	Xyloglucan fucosyltransferase	Galactoside 2-alpha-L-fucosyltransferase OS=Arabidopsis thaliana OX=3702 GN=FUT1 PE=1 SV=2	PREDICTED: probable fucosyltransferase 8 [Cucumis sativus]
Csa4G064690	7.49202	4.44288	6.30828	3.93174	3.93466	4.12156	0.520274	1.09723	0.962859	-0.595321	normal	-2.8663	down	-2.26251	down	[Q]	Secondary metabolites biosynthesis, transport and catabolism	Molecular Function: beta-carotene 15,15'-monooxygenase activity (GO:0003834);; Biological Process: response to water deprivation (GO:0009414);; Cellular Component: chloroplast thylakoid membrane (GO:0009535);; Cellular Component: chloroplast stroma (GO:0009570);; Biological Process: hyperosmotic salinity response (GO:0042538);; Molecular Function: 9-cis-epoxycarotenoid dioxygenase activity (GO:00…	K09840|0|csv:101219505|K09840 9-cis-epoxycarotenoid dioxygenase [EC:1.13.11.51] | (RefSeq) NCED2; 9-cis-epoxycarotenoid dioxygenase NCED3, chloroplastic-like	Carotenoid biosynthesis (ko00906)	[Q]	Secondary metabolites biosynthesis, transport and catabolism	Retinal pigment epithelial membrane protein	9-cis-epoxycarotenoid dioxygenase NCED1, chloroplastic OS=Phaseolus vulgaris OX=3885 GN=NCED1 PE=2 SV=1	PREDICTED: 9-cis-epoxycarotenoid dioxygenase NCED3, chloroplastic-like [Cucumis sativus]
Csa4G082440	73.946	51.9379	59.4199	57.3974	43.3634	57.4634	17.3677	18.7982	14.8708	-0.219349	normal	-1.9202	down	-1.69393	down	[R]	General function prediction only	Cellular Component: cytoplasm (GO:0005737);;	--	--	--	--	--	Pathogen-related protein OS=Hordeum vulgare OX=4513 PE=2 SV=2	PREDICTED: pathogen-related protein-like [Cucumis sativus]
Csa4G083610	86.4682	55.4857	79.4791	62.2855	62.5085	86.1041	30.325	29.736	36.1851	-0.0635832	normal	-1.26667	down	-1.19532	down	--	--	Cellular Component: extracellular region (GO:0005576);; Cellular Component: chloroplast (GO:0009507);;	--	--	--	--	GDSL/SGNH-like Acyl-Esterase family found in Pmr5 and Cas1p;; PMR5 N terminal Domain	Protein trichome birefringence-like 41 OS=Arabidopsis thaliana OX=3702 GN=TBL41 PE=2 SV=1	PREDICTED: protein trichome birefringence-like 41 [Cucumis sativus]
Csa4G099770	47.3743	39.6166	52.0078	36.863	39.7997	46.1256	23.79	23.0896	31.4581	-0.167264	normal	-0.888608	down	-0.712626	down	[E]	Amino acid transport and metabolism	Molecular Function: serine-type carboxypeptidase activity (GO:0004185);; Cellular Component: extracellular region (GO:0005576);; Biological Process: proteolysis (GO:0006508);;	K16297|0|csv:101204596|K16297 serine carboxypeptidase-like clade II [EC:3.4.16.-] | (RefSeq) serine carboxypeptidase-like 25	--	[OE]	Posttranslational modification, protein turnover, chaperones;; Amino acid transport and metabolism	Serine carboxypeptidase	Serine carboxypeptidase-like 25 OS=Arabidopsis thaliana OX=3702 GN=SCPL25 PE=2 SV=2	PREDICTED: serine carboxypeptidase-like 25 isoform X1 [Cucumis sativus]
Csa4G111590	0.683584	0.958226	0.833725	0.791776	0.736199	0.904979	0.095725	0.262155	0.271513	-0.00709649	normal	-1.98864	down	-1.97368	down	[H]	Coenzyme transport and metabolism	Molecular Function: GTP cyclohydrolase II activity (GO:0003935);; Biological Process: circadian rhythm (GO:0007623);; Molecular Function: 3,4-dihydroxy-2-butanone-4-phosphate synthase activity (GO:0008686);; Biological Process: riboflavin biosynthetic process (GO:0009231);; Cellular Component: chloroplast stroma (GO:0009570);; Cellular Component: membrane (GO:0016020);; Biological Process: root h…	K14652|0|csv:101222220|K14652 3,4-dihydroxy 2-butanone 4-phosphate synthase / GTP cyclohydrolase II [EC:4.1.99.12 3.5.4.25] | (RefSeq) bifunctional riboflavin biosynthesis protein RIBA 1, chloroplastic-like	Riboflavin metabolism (ko00740)	[H]	Coenzyme transport and metabolism	3,4-dihydroxy-2-butanone 4-phosphate synthase;; GTP cyclohydrolase II	Bifunctional riboflavin biosynthesis protein RIBA 1, chloroplastic OS=Arabidopsis thaliana OX=3702 GN=RIBA1 PE=1 SV=2	PREDICTED: bifunctional riboflavin biosynthesis protein RIBA 1, chloroplastic-like [Cucumis sativus]
Csa4G126480	17.347	20.0131	17.7033	16.8431	14.2046	13.1646	9.21812	9.09295	7.5142	-0.298776	normal	-1.14575	down	-0.839048	down	--	--	--	K09264|4.85659e-137|csv:101218674|K09264 MADS-box transcription factor, plant | (RefSeq) truncated transcription factor CAULIFLOWER A	--	[K]	Transcription	K-box region	Agamous-like MADS-box protein AGL8 homolog OS=Solanum tuberosum OX=4113 PE=2 SV=1	PREDICTED: truncated transcription factor CAULIFLOWER A isoform X1 [Cucumis sativus]
Csa4G153810	0.525288	0.923922	0.618153	0.544586	0.394731	0.466859	0.246742	0.253422	0.251351	-0.532556	normal	-1.48119	down	-0.94081	down	--	--	Molecular Function: protein binding (GO:0005515);; Cellular Component: nucleus (GO:0005634);; Cellular Component: endoplasmic reticulum (GO:0005783);; Cellular Component: plasmodesma (GO:0009506);; Cellular Component: integral component of membrane (GO:0016021);; Biological Process: cellular protein localization (GO:0034613);; Biological Process: long-day photoperiodism, flowering (GO:0048574);;	--	--	--	--	Plant phosphoribosyltransferase C-terminal;; C2 domain	FT-interacting protein 1 OS=Arabidopsis thaliana OX=3702 GN=FTIP1 PE=1 SV=1	PREDICTED: multiple C2 and transmembrane domain-containing protein 1 [Cucumis sativus]
Csa4G165900	3.81457	3.97393	2.43357	3.14982	3.53928	2.8422	1.79611	2.26761	1.72928	-0.0841207	normal	-0.874142	down	-0.782915	down	--	--	Cellular Component: extracellular region (GO:0005576);; Biological Process: steroid biosynthetic process (GO:0006694);; Molecular Function: S-adenosylmethionine-dependent methyltransferase activity (GO:0008757);; Cellular Component: plant-type cell wall (GO:0009505);; Biological Process: cellular process (GO:0009987);; Biological Process: methylation (GO:0032259);; Biological Process: single-orga…	--	--	--	--	Protein of unknown function (DUF642)	--	PREDICTED: uncharacterized protein LOC101213859 [Cucumis sativus]
Csa4G286930	28.8147	31.9692	26.3463	20.8942	28.6808	22.9747	13.7006	16.1989	13.8199	-0.255137	normal	-1.04721	down	-0.783984	down	[L]	Replication, recombination and repair	Biological Process: mitotic cell cycle (GO:0000278);; Biological Process: regionalization (GO:0003002);; Molecular Function: DNA binding (GO:0003677);; Molecular Function: DNA topoisomerase type II (ATP-hydrolyzing) activity (GO:0003918);; Molecular Function: ATP binding (GO:0005524);; Cellular Component: nucleus (GO:0005634);; Cellular Component: chromosome (GO:0005694);; Biological Process: DNA…	--	--	--	--	Topoisomerase VI B subunit, transducer;; Histidine kinase-, DNA gyrase B-, and HSP90-like ATPase;; Histidine kinase-, DNA gyrase B-, and HSP90-like ATPase	DNA topoisomerase 6 subunit B OS=Arabidopsis thaliana OX=3702 GN=TOP6B PE=1 SV=1	PREDICTED: DNA topoisomerase 6 subunit B [Cucumis sativus]
Csa4G286940	2960.03	2432.6	2545.87	2118.77	2508.49	3944.87	917.475	1282.22	913.166	-0.176679	normal	-1.41422	down	-1.22997	down	--	--	Biological Process: fatty acid metabolic process (GO:0006631);; Biological Process: lipid biosynthetic process (GO:0008610);; Cellular Component: plastid (GO:0009536);; Biological Process: response to abiotic stimulus (GO:0009628);; Biological Process: cofactor metabolic process (GO:0051186);; Biological Process: monocarboxylic acid biosynthetic process (GO:0072330);; Biological Process: organic …	K00454|8.65367e-72|csv:101216566|K00454 lipoxygenase [EC:1.13.11.12] | (RefSeq) linoleate 13S-lipoxygenase 2-1, chloroplastic	Linoleic acid metabolism (ko00591);; alpha-Linolenic acid metabolism (ko00592)	--	--	Lipoxygenase;; PLAT/LH2 domain	Lipoxygenase 2.3, chloroplastic OS=Hordeum vulgare OX=4513 GN=LOX2.3 PE=1 SV=1	hypothetical protein Csa_4G286940 [Cucumis sativus]
Csa4G286950	1899.35	1599.43	1653.78	1213.93	1476.41	1128.86	587.211	700.048	539.66	-0.420805	normal	-1.55498	down	-1.12624	down	--	--	Molecular Function: iron ion binding (GO:0005506);; Biological Process: cellular amino acid metabolic process (GO:0006520);; Biological Process: coenzyme metabolic process (GO:0006732);; Biological Process: sulfur compound metabolic process (GO:0006790);; Biological Process: phosphate-containing compound metabolic process (GO:0006796);; Biological Process: isoprenoid biosynthetic process (GO:0008…	K00454|2.28069e-34|csv:101216566|K00454 lipoxygenase [EC:1.13.11.12] | (RefSeq) linoleate 13S-lipoxygenase 2-1, chloroplastic	Linoleic acid metabolism (ko00591);; alpha-Linolenic acid metabolism (ko00592)	--	--	Lipoxygenase	Lipoxygenase 2, chloroplastic OS=Arabidopsis thaliana OX=3702 GN=LOX2 PE=1 SV=1	hypothetical protein Csa_4G286950 [Cucumis sativus]
Csa4G286960	386.713	323.807	310.097	214.215	329.999	296.746	93.0178	138.393	126.863	-0.270518	normal	-1.57112	down	-1.29272	down	--	--	Molecular Function: oxidoreductase activity (GO:0016491);; Biological Process: single-organism metabolic process (GO:0044710);;	K00454|2.47775e-178|csv:101216318|K00454 lipoxygenase [EC:1.13.11.12] | (RefSeq) linoleate 13S-lipoxygenase 2-1, chloroplastic-like	Linoleic acid metabolism (ko00591);; alpha-Linolenic acid metabolism (ko00592)	--	--	Lipoxygenase;; PLAT/LH2 domain	Lipoxygenase 2.3, chloroplastic OS=Hordeum vulgare OX=4513 GN=LOX2.3 PE=1 SV=1	hypothetical protein Csa_4G286960 [Cucumis sativus]
Csa4G287530	6.7615	8.05953	5.96493	4.72153	11.3073	8.65764	1.12672	1.37116	3.40049	0.257547	normal	-1.87835	down	-2.12627	down	--	--	Cellular Component: cytoplasm (GO:0005737);; Biological Process: response to stress (GO:0006950);; Biological Process: lipid biosynthetic process (GO:0008610);; Biological Process: response to abiotic stimulus (GO:0009628);; Biological Process: monocarboxylic acid metabolic process (GO:0032787);; Biological Process: cellular lipid metabolic process (GO:0044255);; Biological Process: carboxylic ac…	K00454|3.17424e-101|csv:101215361|K00454 lipoxygenase [EC:1.13.11.12] | (RefSeq) lipoxygenase 2, chloroplastic-like	Linoleic acid metabolism (ko00591);; alpha-Linolenic acid metabolism (ko00592)	--	--	Lipoxygenase	Lipoxygenase 2.3, chloroplastic OS=Hordeum vulgare OX=4513 GN=LOX2.3 PE=1 SV=1	hypothetical protein Csa_4G287530 [Cucumis sativus]
Csa4G288080	13.0637	5.17825	11.1531	7.09479	6.53568	11.9301	3.47038	2.8303	3.8165	-0.202762	normal	-1.60876	down	-1.3987	down	--	--	Molecular Function: oxidoreductase activity (GO:0016491);; Cellular Component: chloroplast part (GO:0044434);; Biological Process: response to stimulus (GO:0050896);; Biological Process: monocarboxylic acid biosynthetic process (GO:0072330);;	K00454|0|csv:101209531|K00454 lipoxygenase [EC:1.13.11.12] | (RefSeq) linoleate 13S-lipoxygenase 2-1, chloroplastic-like	Linoleic acid metabolism (ko00591);; alpha-Linolenic acid metabolism (ko00592)	--	--	Lipoxygenase;; PLAT/LH2 domain	Linoleate 13S-lipoxygenase 2-1, chloroplastic OS=Solanum tuberosum OX=4113 GN=LOX2.1 PE=1 SV=1	hypothetical protein Csa_4G288080 [Cucumis sativus]
Csa4G291370	472.096	404.009	417.043	306.227	351.863	321.391	105.31	136.794	102.137	-0.389866	normal	-1.96809	down	-1.57056	down	[C]	Energy production and conversion	Molecular Function: aldehyde dehydrogenase [NAD(P)+] activity (GO:0004030);; Cellular Component: endoplasmic reticulum (GO:0005783);; Biological Process: cellular aldehyde metabolic process (GO:0006081);; Biological Process: cell communication (GO:0007154);; Biological Process: response to external stimulus (GO:0009605);; Biological Process: response to abiotic stimulus (GO:0009628);; Cellular Co…	K00128|0|csv:101205263|K00128 aldehyde dehydrogenase (NAD+) [EC:1.2.1.3] | (RefSeq) aldehyde dehydrogenase family 3 member F1-like	Glycolysis / Gluconeogenesis (ko00010);; Pentose and glucuronate interconversions (ko00040);; Ascorbate and aldarate metabolism (ko00053);; Fatty acid degradation (ko00071);; Valine, leucine and isoleucine degradation (ko00280);; Lysine degradation (ko00310);; Arginine and proline metabolism (ko00330);; Histidine metabolism (ko00340);; Tryptophan metabolism (ko00380);; beta-Alanine metabolism (ko…	[C]	Energy production and conversion	Aldehyde dehydrogenase family	Aldehyde dehydrogenase family 3 member F1 OS=Arabidopsis thaliana OX=3702 GN=ALDH3F1 PE=2 SV=2	PREDICTED: aldehyde dehydrogenase family 3 member F1-like [Cucumis sativus]
Csa4G293860	162.04	118.252	188.388	147.993	155.117	201.558	93.2736	80.5969	113.537	0.117016	normal	-0.768321	down	-0.8766	down	[CP]	Energy production and conversion;; Inorganic ion transport and metabolism	Molecular Function: magnesium ion binding (GO:0000287);; Molecular Function: inorganic diphosphatase activity (GO:0004427);; Cellular Component: cytosol (GO:0005829);; Biological Process: phosphate-containing compound metabolic process (GO:0006796);; Cellular Component: membrane (GO:0016020);; Biological Process: response to cadmium ion (GO:0046686);;	K01507|8.52796e-157|csv:101217432|K01507 inorganic pyrophosphatase [EC:3.6.1.1] | (RefSeq) soluble inorganic pyrophosphatase 4	Oxidative phosphorylation (ko00190)	[C]	Energy production and conversion	Inorganic pyrophosphatase	Soluble inorganic pyrophosphatase 4 OS=Arabidopsis thaliana OX=3702 GN=PPA4 PE=1 SV=1	PREDICTED: soluble inorganic pyrophosphatase 4 [Cucumis sativus]
Csa4G295530	20.4664	14.1211	15.0317	17.9801	13.917	8.86361	5.41356	7.35965	4.60447	-0.271961	normal	-1.57027	down	-1.29044	down	--	--	--	--	--	--	--	--	--	hypothetical protein Csa_4G295530 [Cucumis sativus]
Csa4G296030	7.34062	6.45124	5.99977	4.97863	4.28335	3.87828	1.86547	2.08752	1.47916	-0.570487	normal	-1.92944	down	-1.35123	down	[Z]	Cytoskeleton	Molecular Function: structural constituent of cytoskeleton (GO:0005200);; Molecular Function: ATP binding (GO:0005524);; Cellular Component: cell wall (GO:0005618);; Cellular Component: nucleus (GO:0005634);; Cellular Component: mitochondrion (GO:0005739);; Cellular Component: cytoskeleton (GO:0005856);; Cellular Component: plasma membrane (GO:0005886);; Biological Process: gluconeogenesis (GO:00…	K10355|0|csv:101214246|K10355 actin, other eukaryote | (RefSeq) actin-like	--	[Z]	Cytoskeleton	Actin	Actin OS=Gossypium hirsutum OX=3635 PE=3 SV=1	hypothetical protein Csa_4G296030 [Cucumis sativus]
Csa4G297420	16.6779	19.2694	22.4056	9.80718	13.1167	17.0832	5.08905	4.38683	8.03241	-0.529442	normal	-1.79398	down	-1.25561	down	--	--	--	--	--	--	--	C1 domain	--	PREDICTED: uncharacterized protein LOC101223041 [Cucumis sativus]
Csa4G312830	106.258	92.1714	85.7149	85.4633	72.6133	76.5562	45.0907	43.0342	43.251	-0.264896	normal	-1.17328	down	-0.901012	down	--	--	Molecular Function: catalytic activity (GO:0003824);; Cellular Component: extracellular region (GO:0005576);;	K08059|5.60257e-161|csv:101211199|K08059 interferon, gamma-inducible protein 30 | (RefSeq) gamma-interferon-inducible lysosomal thiol reductase	--	[O]	Posttranslational modification, protein turnover, chaperones	Gamma interferon inducible lysosomal thiol reductase (GILT)	--	PREDICTED: gamma-interferon-inducible lysosomal thiol reductase [Cucumis sativus]
Csa4G314420	82.2997	52.8652	66.3497	52.9457	53.4246	73.0737	26.8094	27.9587	35.7331	-0.161821	normal	-1.22048	down	-1.05112	down	--	--	Cellular Component: intracellular membrane-bounded organelle (GO:0043231);; Cellular Component: cytoplasmic part (GO:0044444);;	--	--	[U]	Intracellular trafficking, secretion, and vesicular transport	PRA1 family protein	PRA1 family protein B4 OS=Arabidopsis thaliana OX=3702 GN=PRA1B4 PE=1 SV=1	PREDICTED: PRA1 family protein B2 [Cucumis sativus]
Csa4G314520	12.8699	11.625	12.0269	8.54949	10.4379	9.95892	4.14361	5.47694	4.53374	-0.402645	normal	-1.47067	down	-1.05977	down	--	--	Molecular Function: iron ion transmembrane transporter activity (GO:0005381);; Cellular Component: plasma membrane (GO:0005886);; Biological Process: cobalt ion transport (GO:0006824);; Cellular Component: plant-type vacuole membrane (GO:0009705);; Biological Process: cellular response to iron ion starvation (GO:0010106);; Biological Process: response to nitrate (GO:0010167);; Molecular Function:…	K14685|0|csv:101209963|K14685 solute carrier family 40 (iron-regulated transporter), member 1 | (RefSeq) solute carrier family 40 member 2	--	[P]	Inorganic ion transport and metabolism	Ferroportin1 (FPN1)	Solute carrier family 40 member 2 OS=Arabidopsis thaliana OX=3702 GN=IREG2 PE=2 SV=1	PREDICTED: solute carrier family 40 member 2 isoform X2 [Cucumis sativus]
Csa4G325520	48.186	24.172	35.4786	25.2812	14.4392	36.3463	10.9194	8.71273	14.7733	-0.502327	normal	-1.71804	down	-1.20907	down	--	--	--	--	--	--	--	Wound-induced protein WI12	Senescence associated gene 20 OS=Arabidopsis thaliana OX=3702 GN=SAG20 PE=2 SV=1	PREDICTED: wound-induced protein 1 [Cucumis sativus]
Csa4G334730	55.7954	52.4427	55.3661	39.2537	43.3764	44.7587	29.7698	35.5518	28.3666	-0.273137	normal	-0.960945	down	-0.680321	down	[K]	Transcription	Molecular Function: protein serine/threonine kinase activity (GO:0004674);; Molecular Function: protein tyrosine kinase activity (GO:0004713);; Molecular Function: ATP binding (GO:0005524);; Cellular Component: plasma membrane (GO:0005886);; Biological Process: acetyl-CoA metabolic process (GO:0006084);; Biological Process: protein phosphorylation (GO:0006468);; Biological Process: microtubule nu…	--	--	--	--	Protein kinase domain;; Protein tyrosine kinase;; Leucine rich repeat;; Leucine Rich repeats (2 copies);; Leucine rich repeat N-terminal domain;; Leucine Rich Repeat	Probable inactive receptor kinase At5g58300 OS=Arabidopsis thaliana OX=3702 GN=At5g58300 PE=2 SV=1	PREDICTED: probable inactive receptor kinase At5g58300 [Cucumis sativus]
Csa4G337320	3.34816	2.07135	3.18691	2.19072	2.23471	2.58969	1.23154	1.19799	1.46849	-0.285842	normal	-1.20582	down	-0.911365	down	--	--	--	--	--	--	--	--	--	PREDICTED: uncharacterized protein LOC101205031 isoform X1 [Cucumis sativus]
Csa4G411390	11.7894	13.9216	14.0291	8.79787	9.42705	10.6375	5.33092	6.9459	6.88015	-0.445693	normal	-1.1073	down	-0.653351	down	--	--	Cellular Component: extracellular region (GO:0005576);; Biological Process: response to chitin (GO:0010200);; Molecular Function: transferase activity (GO:0016740);;	--	--	[S]	Function unknown	Protein of unknown function (DUF563)	--	PREDICTED: EGF domain-specific O-linked N-acetylglucosamine transferase-like [Cucumis sativus]
Csa4G429290	3.82042	2.58557	4.16563	4.40233	3.39238	4.11233	1.17148	1.77279	1.00915	0.170833	normal	-1.4567	down	-1.61908	down	[IQR]	Lipid transport and metabolism;; Secondary metabolites biosynthesis, transport and catabolism;; General function prediction only	Molecular Function: 3-oxoacyl-[acyl-carrier-protein] reductase (NADPH) activity (GO:0004316);; Cellular Component: peroxisome (GO:0005777);; Cellular Component: membrane (GO:0016020);; Biological Process: response to cadmium ion (GO:0046686);; Biological Process: oxidation-reduction process (GO:0055114);;	--	--	[R]	General function prediction only	Enoyl-(Acyl carrier protein) reductase;; short chain dehydrogenase	Tropinone reductase homolog At2g29370 OS=Arabidopsis thaliana OX=3702 GN=At2g29370 PE=3 SV=1	hypothetical protein Csa_4G429290 [Cucumis sativus]
Csa4G439080	9.43218	7.70367	12.4587	10.1242	8.49336	11.7878	5.39667	7.79521	6.53662	0.0324896	normal	-0.63746	down	-0.66139	down	--	--	Molecular Function: DNA binding (GO:0003677);; Cellular Component: nucleus (GO:0005634);; Biological Process: metabolic process (GO:0008152);; Molecular Function: 5'-3' exonuclease activity (GO:0008409);;	--	--	--	--	--	--	hypothetical protein Csa_4G439080 [Cucumis sativus]
Csa4G495210	141.1	113.004	122.865	106.413	120.251	118.513	59.5571	68.0363	51.7024	-0.11533	normal	-1.13308	down	-1.01028	down	[J]	Translation, ribosomal structure and biogenesis	Molecular Function: transferase activity (GO:0016740);; Molecular Function: carbon-nitrogen ligase activity, with glutamine as amido-N-donor (GO:0016884);;	--	--	[J]	Translation, ribosomal structure and biogenesis	Amidase	Fatty acid amide hydrolase OS=Arabidopsis thaliana OX=3702 GN=FAAH PE=1 SV=1	hypothetical protein Csa_4G495210 [Cucumis sativus]
Csa4G615760	35.0263	29.8414	33.1984	31.9805	32.3302	35.2151	21.8831	24.3244	20.9828	0.0327238	normal	-0.604571	down	-0.629577	down	--	--	Molecular Function: calmodulin binding (GO:0005516);; Cellular Component: nucleus (GO:0005634);; Biological Process: brassinosteroid biosynthetic process (GO:0016132);; Molecular Function: transferase activity (GO:0016740);;	--	--	[T]	Signal transduction mechanisms	Tetratricopeptide repeat;; Tetratricopeptide repeat;; Tetratricopeptide repeat;; Tetratricopeptide repeat;; Tetratricopeptide repeat;; Tetratricopeptide repeat	Protein NPG1 OS=Arabidopsis thaliana OX=3702 GN=NPG1 PE=1 SV=1	PREDICTED: tetratricopeptide repeat protein 7B [Cucumis sativus]
Csa4G620640	113.203	90.7092	105.696	104.645	105.065	106.68	61.7625	77.5342	61.8358	0.0420759	normal	-0.681874	down	-0.716159	down	[K]	Transcription	Biological Process: signal transduction (GO:0007165);;	--	--	[R]	General function prediction only	Leucine rich repeat;; Leucine Rich repeats (2 copies);; Leucine Rich Repeat;; Leucine rich repeat N-terminal domain;; Leucine Rich repeat	LRR receptor-like serine/threonine-protein kinase GSO1 OS=Arabidopsis thaliana OX=3702 GN=GSO1 PE=1 SV=1	PREDICTED: LRR receptor-like serine/threonine-protein kinase ERL1 [Cucumis sativus]
Csa4G631570	254.915	185.81	247.992	173.408	206.982	225.73	65.9594	82.6457	83.1692	-0.175444	normal	-1.63327	down	-1.44963	down	[G]	Carbohydrate transport and metabolism	Molecular Function: hydrolase activity, hydrolyzing O-glycosyl compounds (GO:0004553);; Biological Process: metabolic process (GO:0008152);; Molecular Function: galactinol-raffinose galactosyltransferase activity (GO:0047268);;	K06617|0|csv:101214893|K06617 raffinose synthase [EC:2.4.1.82] | (RefSeq) AGA1; probable galactinol--sucrose galactosyltransferase 1	Galactose metabolism (ko00052)	--	--	Raffinose synthase or seed imbibition protein Sip1	Probable galactinol--sucrose galactosyltransferase 1 OS=Arabidopsis thaliana OX=3702 GN=RFS1 PE=2 SV=1	PREDICTED: probable galactinol--sucrose galactosyltransferase 1 [Cucumis sativus]
Csa4G631600	16.3044	16.4281	16.9631	18.4977	15.1348	13.7741	10.9905	9.41304	9.30681	-0.046708	normal	-0.797905	down	-0.742811	down	--	--	--	--	--	--	--	--	--	PREDICTED: uncharacterized protein LOC101215612 [Cucumis sativus]
Csa4G637820	30.9514	28.7354	22.6339	23.1131	23.3775	23.0539	15.2399	12.7671	14.1152	-0.232043	normal	-1.0267	down	-0.787281	down	--	--	Molecular Function: adenyl nucleotide binding (GO:0030554);;	--	--	[C]	Energy production and conversion	CBS domain	CBS domain-containing protein CBSX5 OS=Arabidopsis thaliana OX=3702 GN=CBSX5 PE=2 SV=2	PREDICTED: CBS domain-containing protein CBSX5 [Cucumis sativus]
Csa4G638520	13.7608	10.5194	10.3597	7.25699	8.32756	8.74454	3.50741	3.28794	3.09826	-0.501294	normal	-1.86242	down	-1.35365	down	--	--	Cellular Component: chloroplast (GO:0009507);;	--	--	--	--	Protein of unknown function, DUF617	Protein MIZU-KUSSEI 1 OS=Arabidopsis thaliana OX=3702 GN=MIZ1 PE=1 SV=1	PREDICTED: protein MIZU-KUSSEI 1 [Cucumis sativus]
Csa4G639860	15.1791	7.48096	8.31822	10.7918	8.72404	7.76724	3.46803	3.34563	3.48719	-0.18701	normal	-1.63779	down	-1.44375	down	[I]	Lipid transport and metabolism	--	--	--	[I]	Lipid transport and metabolism	Lipase (class 3);; Protein of unknown function (DUF2974)	--	PREDICTED: uncharacterized protein LOC101203391 [Cucumis sativus]
Csa4G639890	425.74	301.517	285.876	453.3	405.147	417.607	187.662	244.195	193.465	0.339415	normal	-0.759404	down	-1.09201	down	[I]	Lipid transport and metabolism	Cellular Component: vacuole (GO:0005773);; Cellular Component: membrane (GO:0016020);;	--	--	[I]	Lipid transport and metabolism	Lipase (class 3);; Protein of unknown function (DUF2974)	Phospholipase A(1) DAD1, chloroplastic OS=Arabidopsis thaliana OX=3702 GN=DAD1 PE=1 SV=1	PREDICTED: uncharacterized protein LOC101203879 [Cucumis sativus]
Csa4G641570	12.4283	8.47813	10.0397	7.92943	8.18645	7.995	2.52978	3.93193	3.37498	-0.35143	normal	-1.7137	down	-1.35408	down	--	--	--	--	--	--	--	SPRY domain	--	PREDICTED: uncharacterized protein LOC101217358 [Cucumis sativus]
Csa4G641730	87.0687	93.5727	83.5691	80.29	79.6086	85.6452	76.4929	2.59901	5.64751	-0.0912506	normal	-1.69717	down	-1.60018	down	--	--	Molecular Function: protein binding (GO:0005515);; Cellular Component: nuclear outer membrane (GO:0005640);; Cellular Component: cytosol (GO:0005829);; Cellular Component: plasma membrane (GO:0005886);; Biological Process: nucleocytoplasmic transport (GO:0006913);; Biological Process: mitotic cell cycle (GO:0007067);; Cellular Component: membrane (GO:0016020);; Cellular Component: intracellular m…	--	--	--	--	WPP domain	MFP1 attachment factor 1 OS=Solanum lycopersicum OX=4081 GN=MAF1 PE=1 SV=1	PREDICTED: MFP1 attachment factor 1-like [Cucumis sativus]
Csa4G643610	12.0201	10.8478	10.356	8.01249	8.19442	7.20061	4.43728	4.49501	4.27557	-0.458229	normal	-1.35307	down	-0.886772	down	[E]	Amino acid transport and metabolism	Molecular Function: catalytic activity (GO:0003824);;	K16296|0|cmo:103493616|K16296 serine carboxypeptidase-like clade I [EC:3.4.16.-] | (RefSeq) serine carboxypeptidase-like 7	--	[OE]	Posttranslational modification, protein turnover, chaperones;; Amino acid transport and metabolism	Serine carboxypeptidase	Serine carboxypeptidase-like 7 OS=Arabidopsis thaliana OX=3702 GN=SCPL7 PE=2 SV=1	hypothetical protein Csa_4G643610 [Cucumis sativus]
Csa4G643620	44.7452	41.3265	28.5884	38.9327	41.3148	28.3665	23.2143	28.0006	23.3517	-0.12404	normal	-0.819972	down	-0.688244	down	[E]	Amino acid transport and metabolism	Molecular Function: carboxypeptidase activity (GO:0004180);; Biological Process: cellular amino acid metabolic process (GO:0006520);; Biological Process: cellular aromatic compound metabolic process (GO:0006725);; Biological Process: coenzyme metabolic process (GO:0006732);; Biological Process: sulfur compound metabolic process (GO:0006790);; Molecular Function: transferase activity, transferring…	K16296|0|csv:101207623|K16296 serine carboxypeptidase-like clade I [EC:3.4.16.-] | (RefSeq) serine carboxypeptidase-like 1	--	[OE]	Posttranslational modification, protein turnover, chaperones;; Amino acid transport and metabolism	Serine carboxypeptidase	Serine carboxypeptidase-like 7 OS=Arabidopsis thaliana OX=3702 GN=SCPL7 PE=2 SV=1	PREDICTED: serine carboxypeptidase-like 1 isoform X1 [Cucumis sativus]
Csa4G645820	22.919	17.1368	16.6489	17.3885	15.9805	18.3486	6.47615	6.63821	6.81395	-0.124051	normal	-1.58746	down	-1.45588	down	--	--	Biological Process: transcription, DNA-templated (GO:0006351);; Biological Process: protein acetylation (GO:0006473);; Biological Process: response to cytokinin (GO:0009735);; Biological Process: primary metabolic process (GO:0044238);; Biological Process: cellular macromolecule metabolic process (GO:0044260);;	K09338|7.23944e-123|csv:101212868|K09338 homeobox-leucine zipper protein | (RefSeq) homeobox-leucine zipper protein HAT9-like	--	[K]	Transcription	Homeobox domain;; Homeobox associated leucine zipper;; Homeobox KN domain	Homeobox-leucine zipper protein HAT22 OS=Arabidopsis thaliana OX=3702 GN=HAT22 PE=1 SV=1	PREDICTED: homeobox-leucine zipper protein HAT9-like [Cucumis sativus]
Csa4G646170	0.974643	1.22852	1.00185	0.969555	0.964216	0.708071	0.182333	0.309272	0.343676	-0.246794	normal	-1.95039	down	-1.69438	down	[QV]	Secondary metabolites biosynthesis, transport and catabolism;; Defense mechanisms	Molecular Function: iron ion binding (GO:0005506);; Biological Process: protein targeting to membrane (GO:0006612);; Molecular Function: electron carrier activity (GO:0009055);; Biological Process: response to wounding (GO:0009611);; Biological Process: coumarin biosynthetic process (GO:0009805);; Biological Process: auxin polar transport (GO:0009926);; Biological Process: regulation of meristem …	K20771|0|csv:101209772|K20771 carlactone C-19 oxidase [EC:1.14.-.-] | (RefSeq) cytochrome P450 711A1	--	[Q]	Secondary metabolites biosynthesis, transport and catabolism	Cytochrome P450	Cytochrome P450 711A1 OS=Arabidopsis thaliana OX=3702 GN=CYP711A1 PE=2 SV=1	PREDICTED: cytochrome P450 711A1 [Cucumis sativus]
Csa4G646330	24.5536	67.2064	38.803	6.27589	55.6702	34.6829	4.71795	6.79059	6.18964	-0.420775	normal	-2.88767	down	-2.45697	down	[K]	Transcription	Cellular Component: cytoplasm (GO:0005737);;	K15264|0|csv:101212715|K15264 putative methyltransferase [EC:2.1.1.-] | (RefSeq) probable 28S rRNA (cytosine-C(5))-methyltransferase	--	[D]	Cell cycle control, cell division, chromosome partitioning	16S rRNA methyltransferase RsmB/F;; Methyltransferase domain;; ubiE/COQ5 methyltransferase family	--	hypothetical protein Csa_4G646330 [Cucumis sativus]
Csa4G649640	609.517	484.143	551.812	438.73	478.788	586.297	259.578	310.506	272.228	-0.120911	normal	-1.02668	down	-0.898321	down	[Q]	Secondary metabolites biosynthesis, transport and catabolism	Biological Process: very long-chain fatty acid metabolic process (GO:0000038);; Cellular Component: nucleus (GO:0005634);; Cellular Component: endoplasmic reticulum (GO:0005783);; Biological Process: fatty acid biosynthetic process (GO:0006633);; Biological Process: response to cold (GO:0009409);; Biological Process: response to light stimulus (GO:0009416);; Biological Process: epidermal cell dif…	K15397|0|csv:101217359|K15397 3-ketoacyl-CoA synthase [EC:2.3.1.199] | (RefSeq) 3-ketoacyl-CoA synthase 10	Fatty acid elongation (ko00062)	--	--	FAE1/Type III polyketide synthase-like protein;; 3-Oxoacyl-[acyl-carrier-protein (ACP)] synthase III C terminal;; Chalcone and stilbene synthases, C-terminal domain	3-ketoacyl-CoA synthase 10 OS=Arabidopsis thaliana OX=3702 GN=FDH PE=1 SV=2	PREDICTED: 3-ketoacyl-CoA synthase 10 [Cucumis sativus]
Csa4G658620	53.4465	35.4594	42.8871	35.9334	38.7043	42.1326	19.0042	21.0009	18.4784	-0.168185	normal	-1.23564	down	-1.06011	down	--	--	Cellular Component: vacuolar membrane (GO:0005774);; Cellular Component: plasma membrane (GO:0005886);; Molecular Function: hedgehog receptor activity (GO:0008158);; Cellular Component: plasmodesma (GO:0009506);; Cellular Component: integral component of membrane (GO:0016021);; Biological Process: cholesterol transport (GO:0030301);;	K12385|0|csv:101203163|K12385 Niemann-Pick C1 protein | (RefSeq) Niemann-Pick C1 protein	--	[I]	Lipid transport and metabolism	Patched family;; Niemann-Pick C1 N terminus;; Sterol-sensing domain of SREBP cleavage-activation	--	PREDICTED: Niemann-Pick C1 protein isoform X1 [Cucumis sativus]
Csa5G029450	280.205	242.336	215.744	182.461	218.233	217.452	152.17	152.48	112.932	-0.24674	normal	-0.881308	down	-0.627623	down	--	--	Biological Process: trichome morphogenesis (GO:0010090);; Cellular Component: apoplast (GO:0048046);;	--	--	--	--	Protein of unknown function, DUF538	--	PREDICTED: uncharacterized protein LOC101204611 [Cucumis sativus]
[truncated: 172 more rows]

## Sheet: DEG-IVs  
DEG-IVs of wild type
	FPKM									log2FC	Regulated Direction	log2FC	Regulated Direction	log2FC	Regulated Direction	Database annotation
[truncated: 723 more rows]

## Sheet: up-regulated
Up-regulated genes in Mutant
	FPKM												log2FC	Regulated Direction	log2FC	Regulated Direction	Database annotation
[truncated: 250 more rows]

## Sheet: down-regulated
Down-regulated genes in Mutant
	FPKM												log2FC	Regulated Direction	log2FC	Regulated Direction	Database annotation
[truncated: 380 more rows]

## Sheet: DEG-IIIs
DEG-IIIs of wild type
[truncated: 28 more rows]
