# Supplementary material for: Comparative Transcriptome Analysis of Hard and Tender Fruit Spines of Cucumber to Identify Genes Involved in the Morphological Development of Fruit Spines
Source: Frontiers journal article supplement (doi:10.3389/fpls.2022.797433), 2022-03-15

# Statistics of Pathway Enrichment

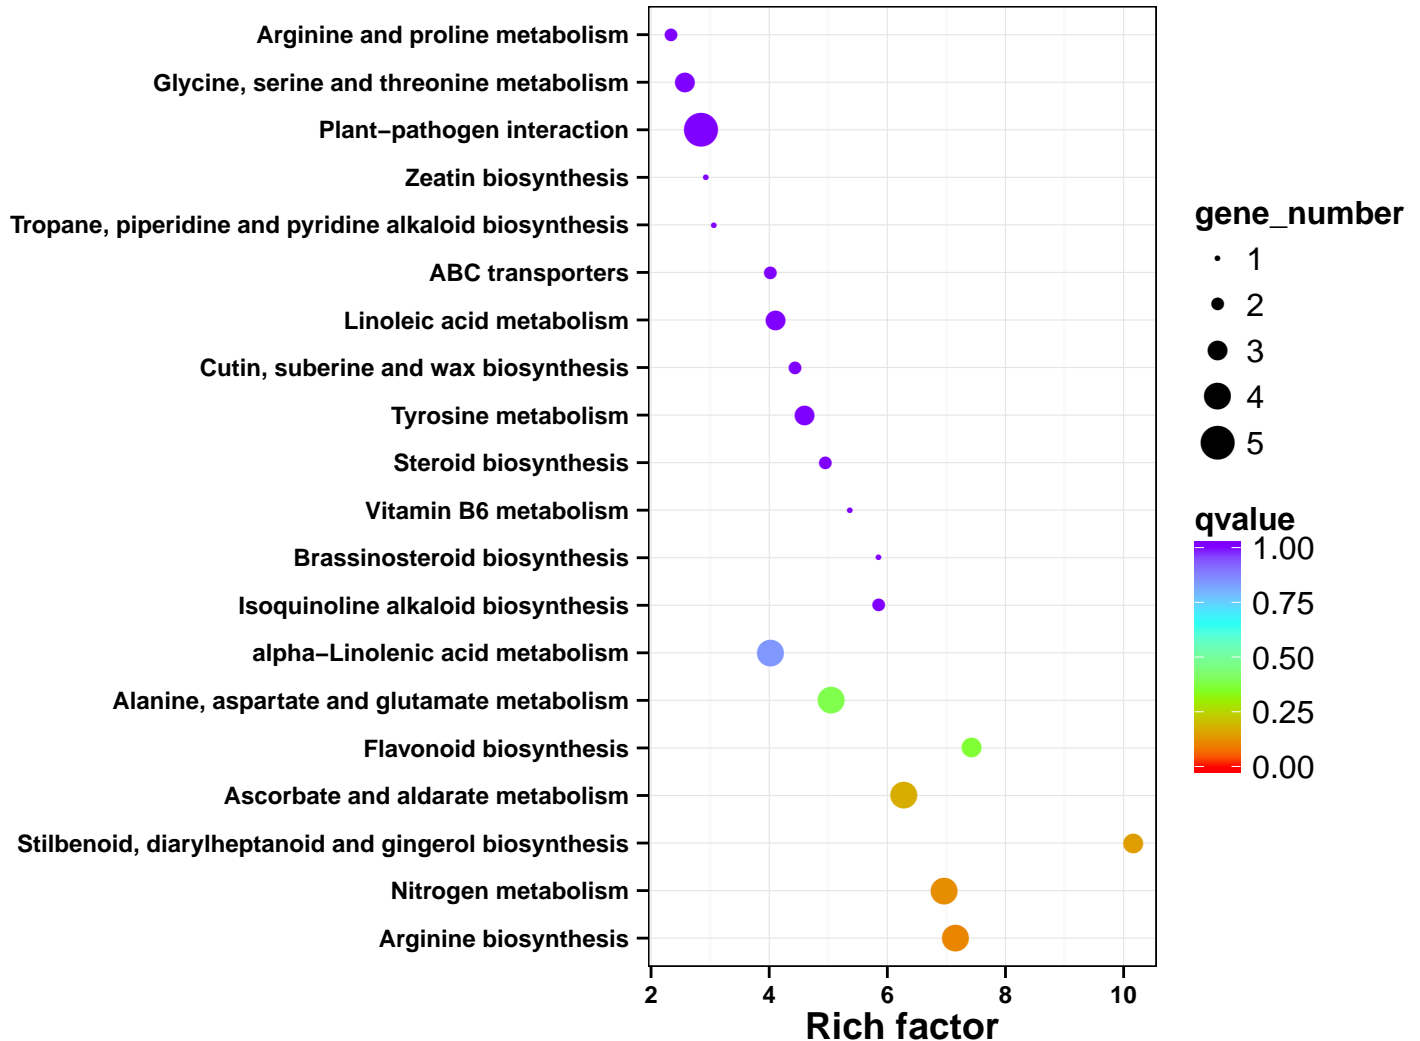

# Statistics of Pathway Enrichment

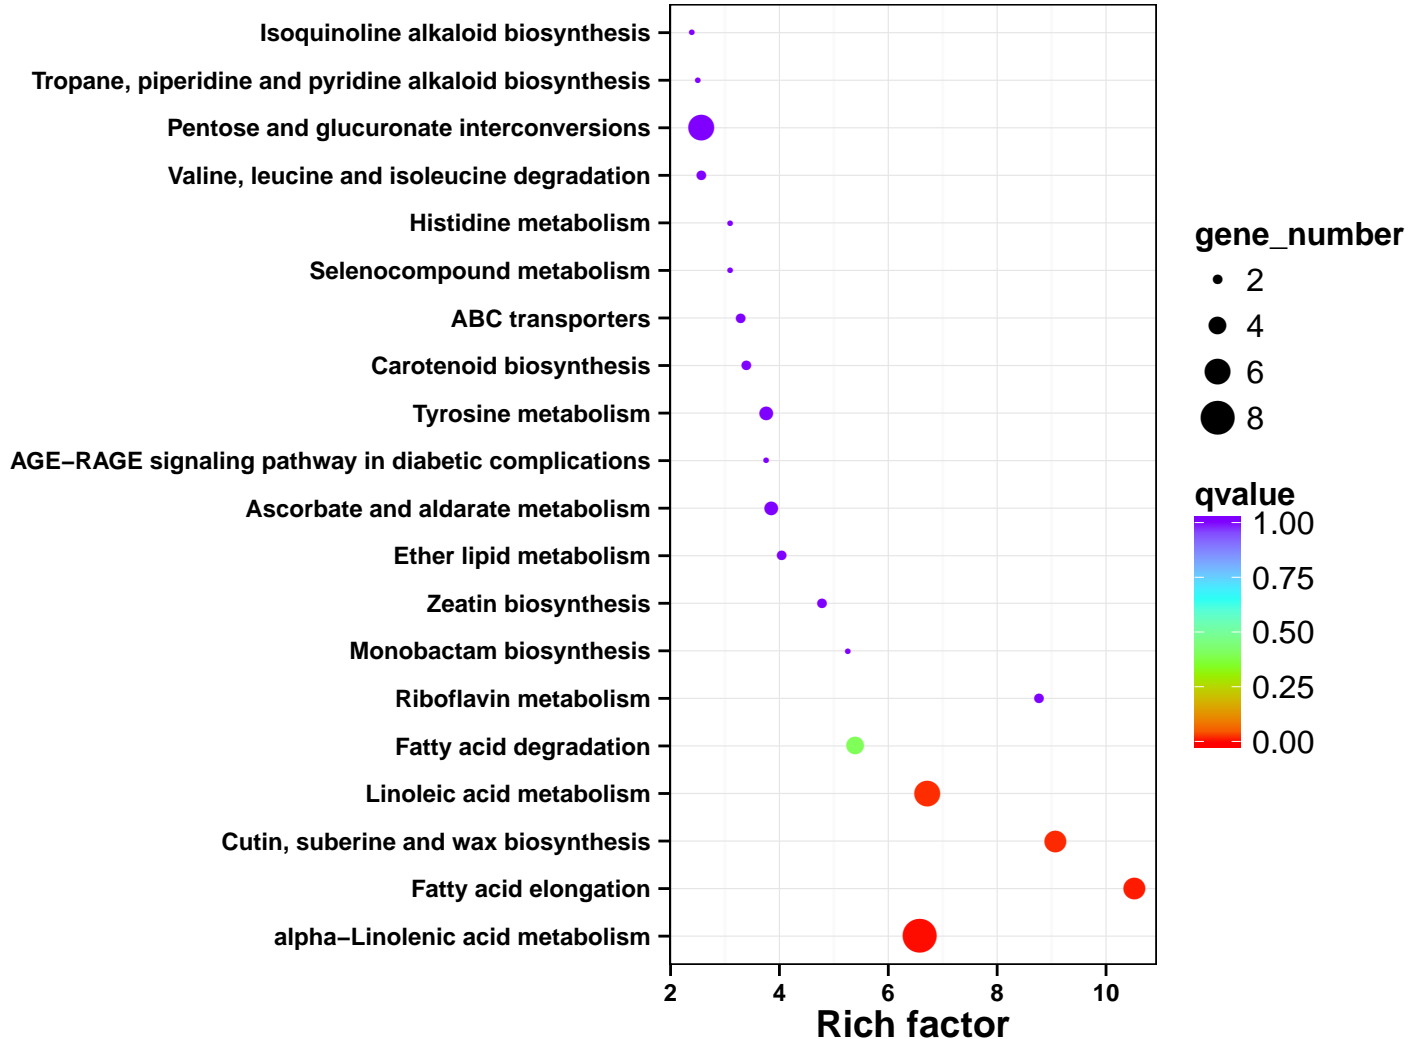

# Statistics of Pathway Enrichment

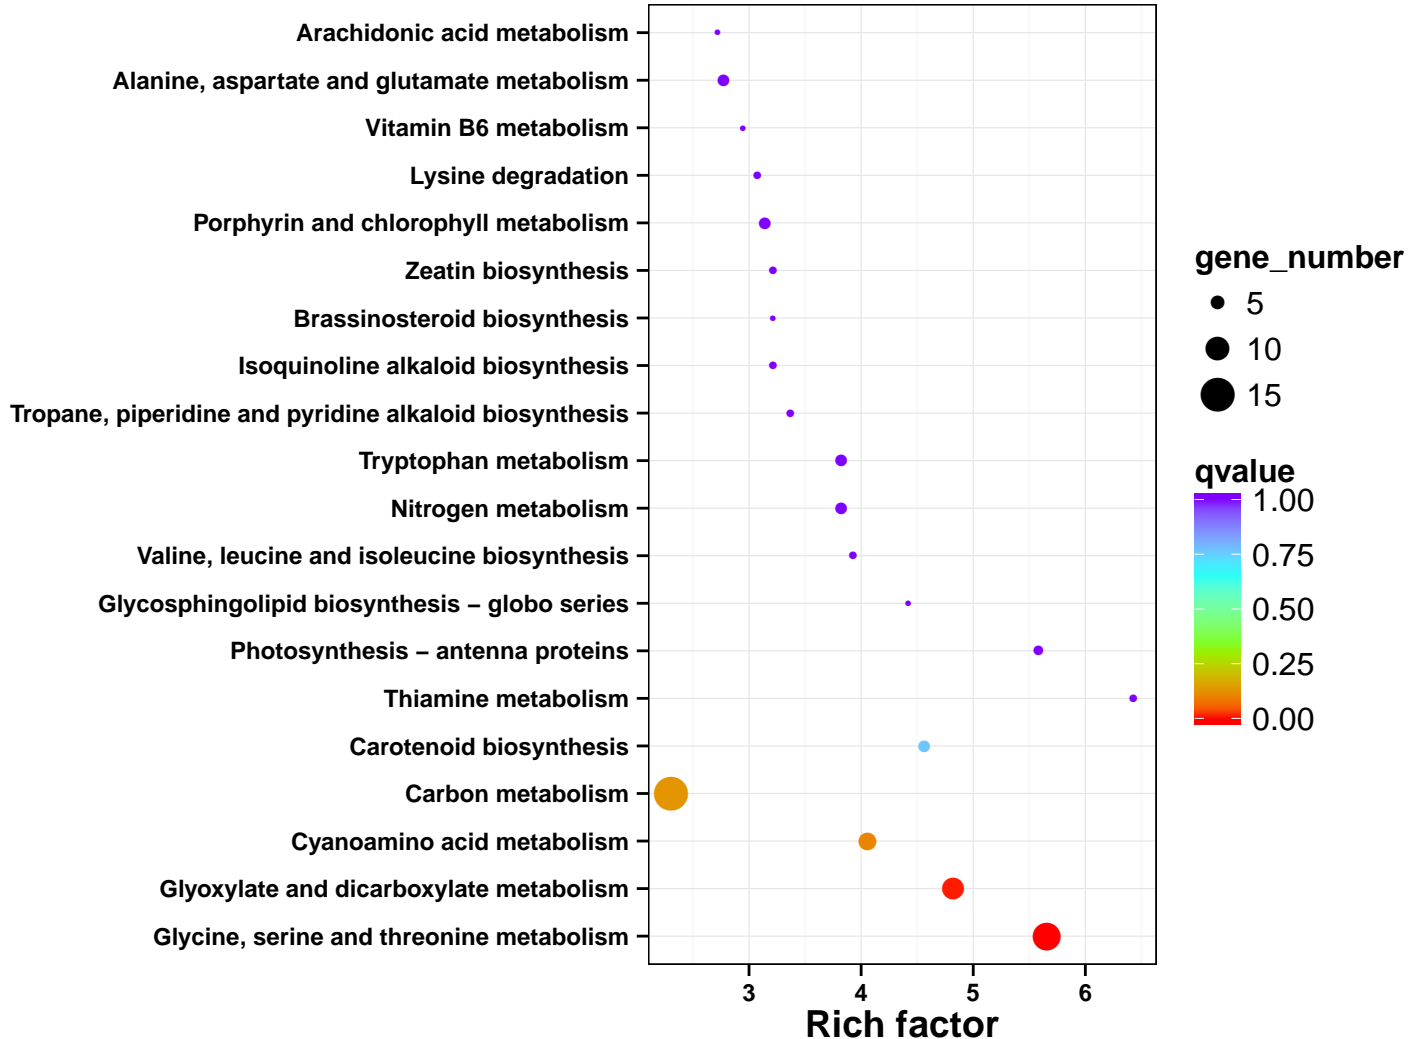

Supplement: Data_Sheet_1.ZIP [file Data_Sheet_1.ZIP]
