# Supplementary figures and images for: Comparative Transcriptome Analysis of Hard and Tender Fruit Spines of Cucumber to Identify Genes Involved in the Morphological Development of Fruit Spines
Source: Frontiers journal article supplement (doi:10.3389/fpls.2022.797433), 2022-03-15

# Statistics of Pathway Enrichment

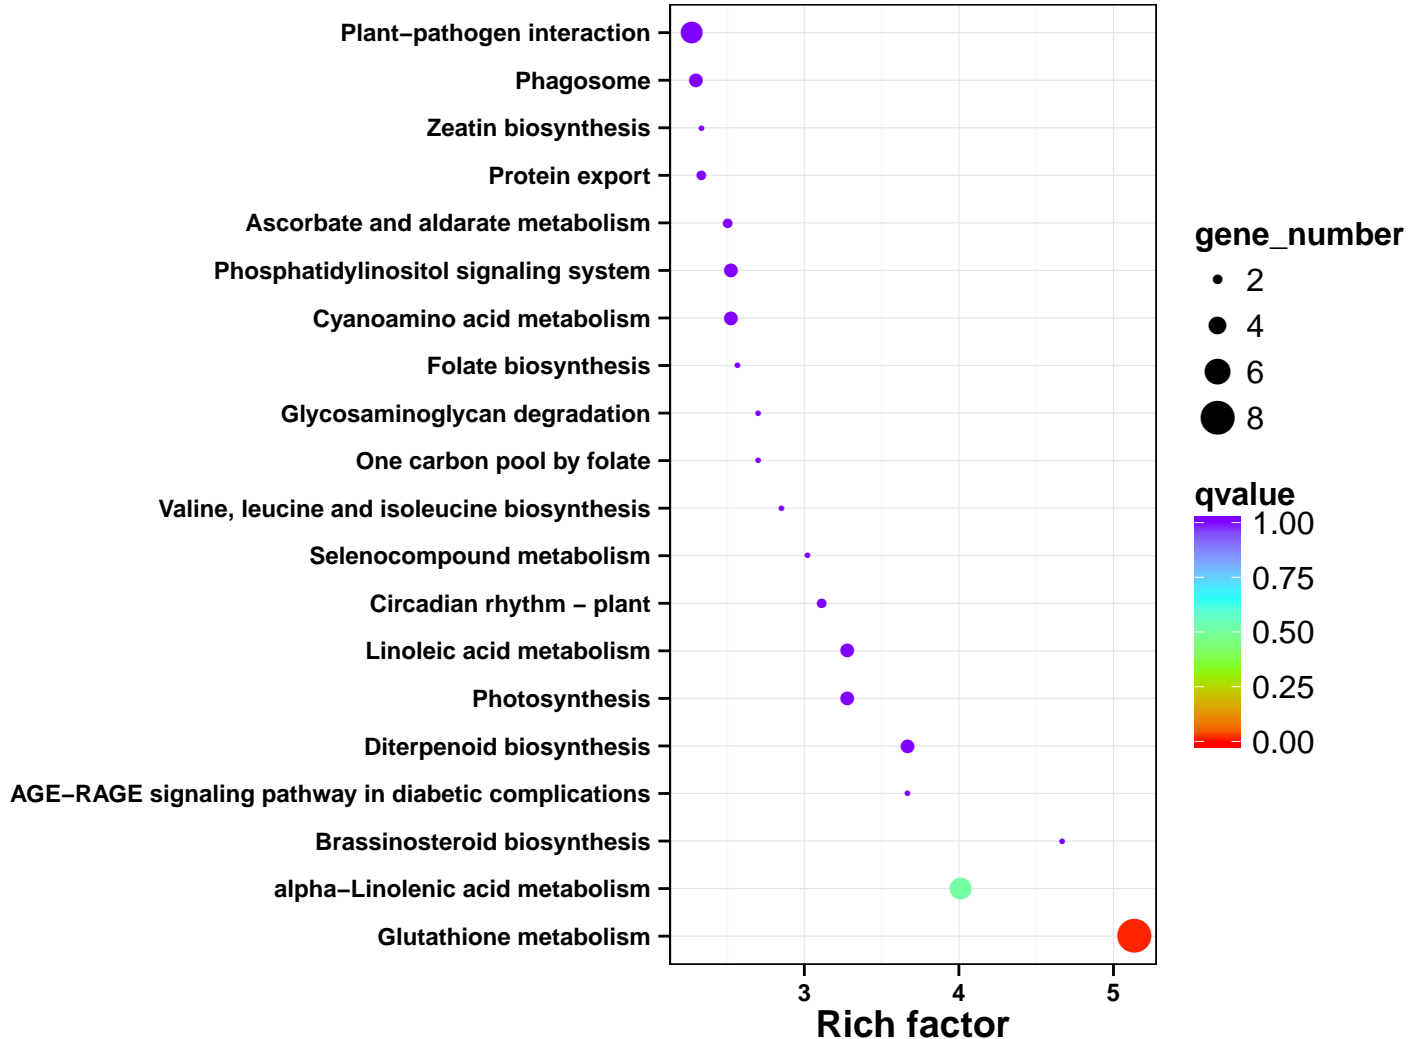

Supplement: Data_Sheet_1.ZIP [file Data_Sheet_1.ZIP]

# Statistics of Pathway Enrichment

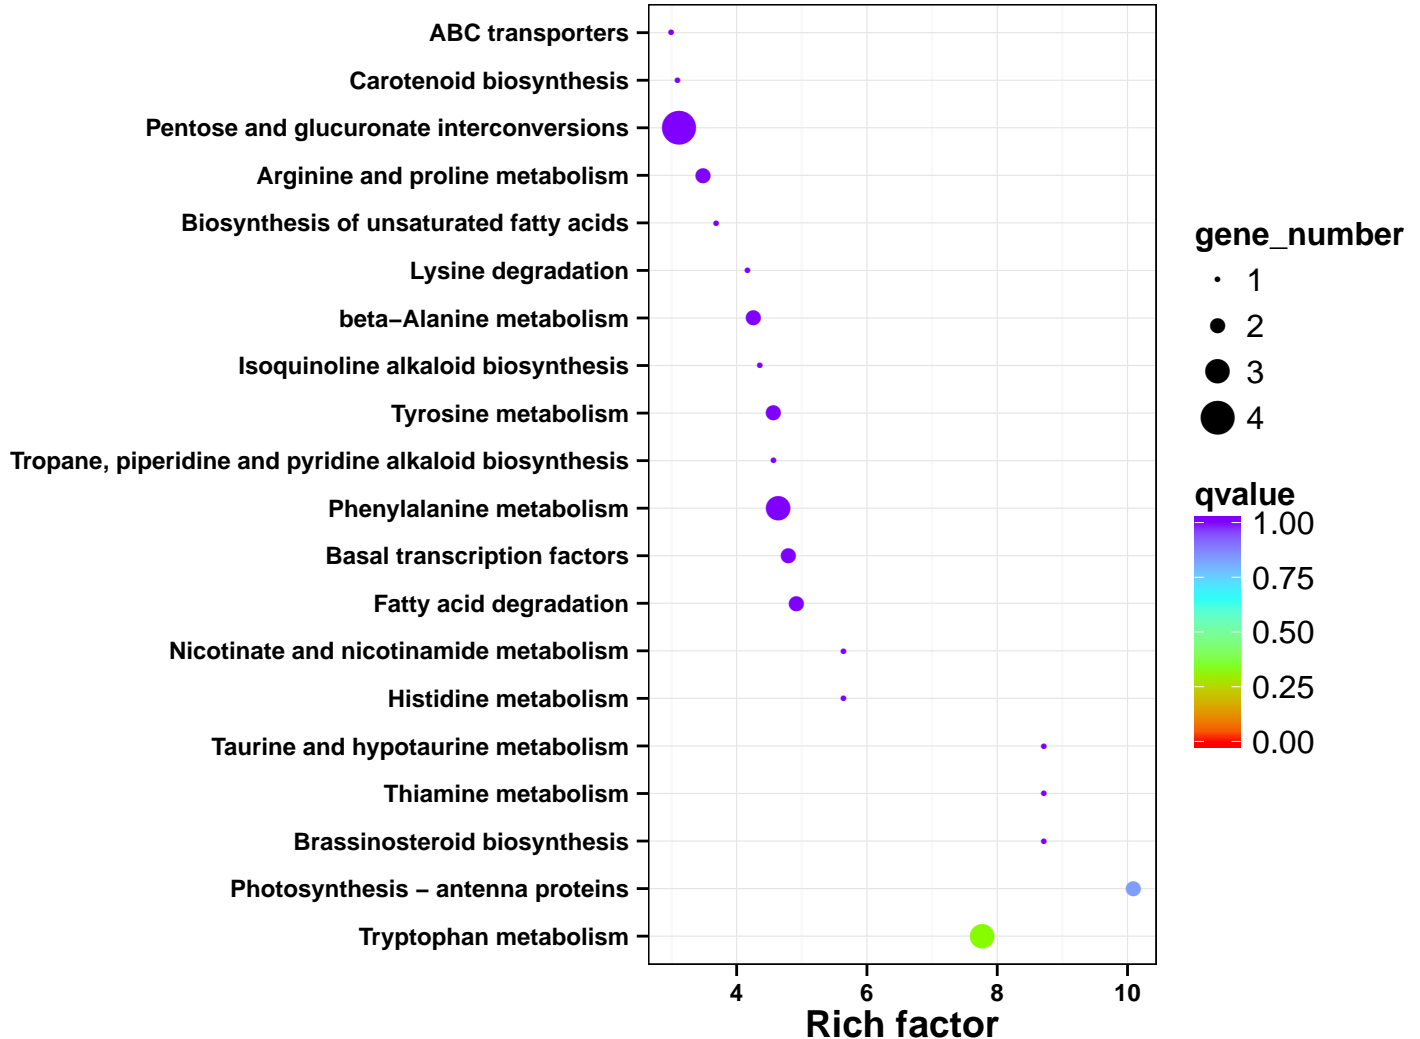

Supplement: Data_Sheet_1.ZIP [file Data_Sheet_1.ZIP]

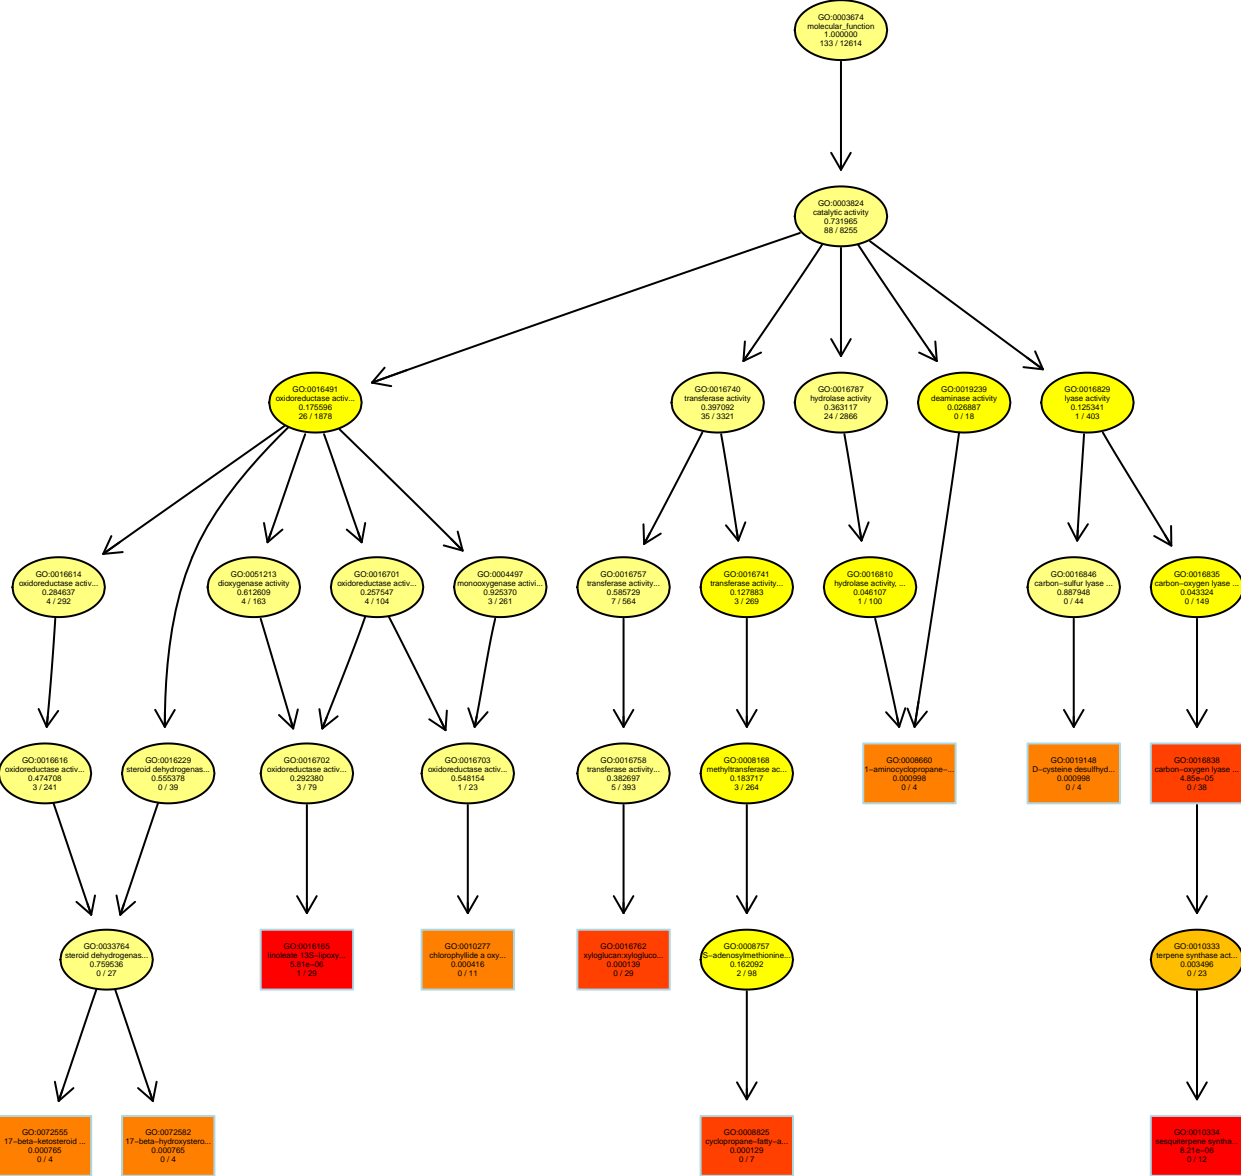

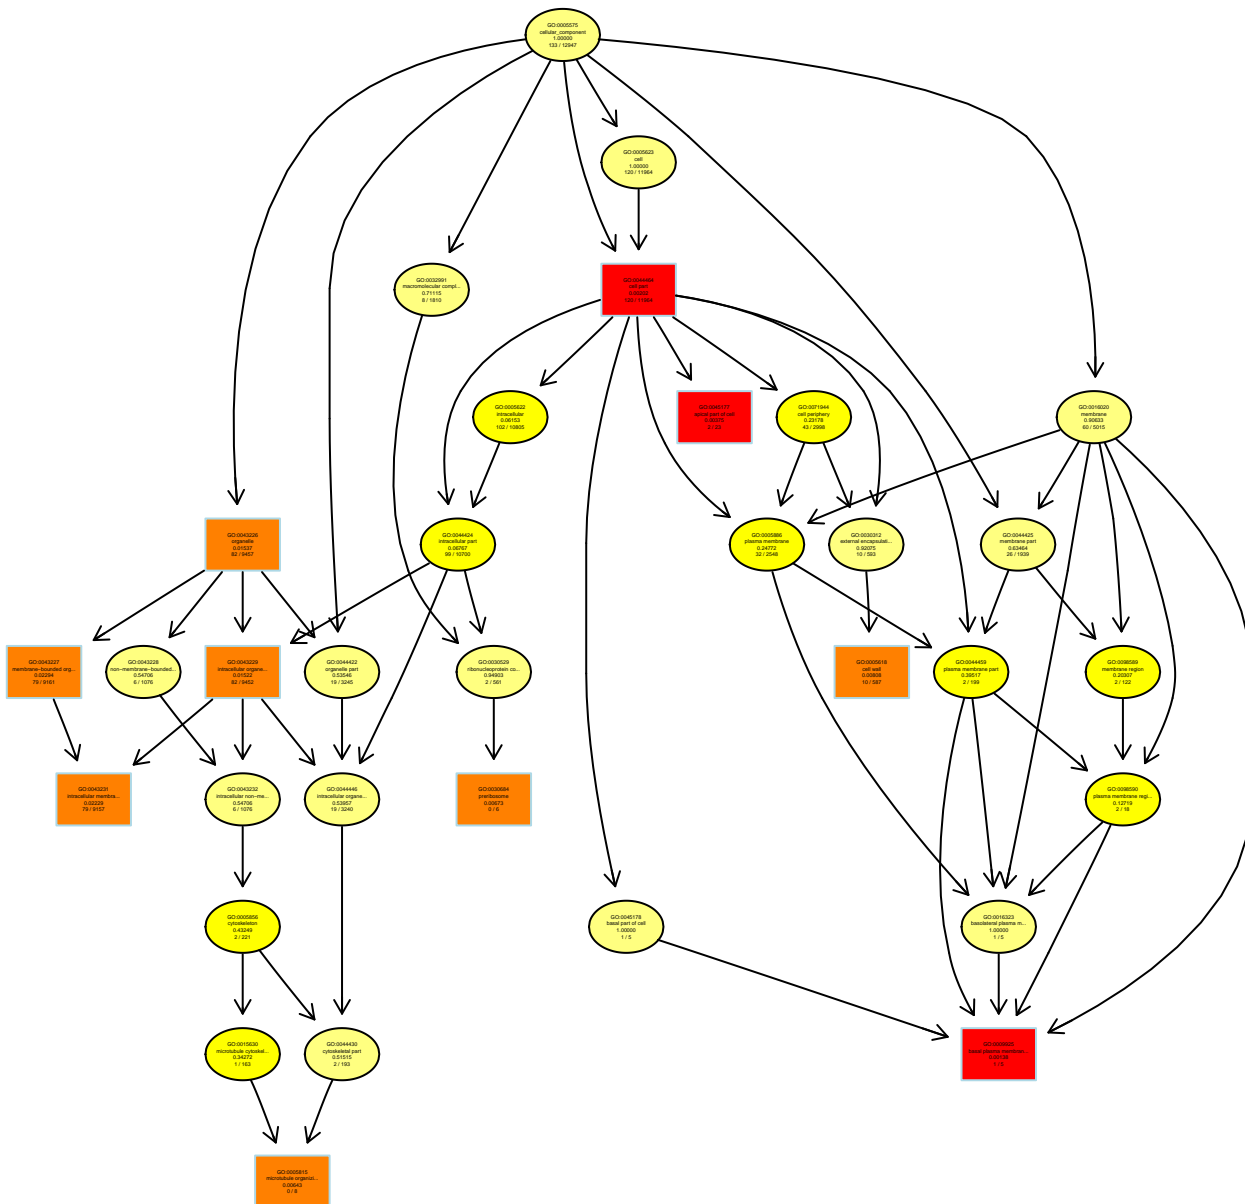

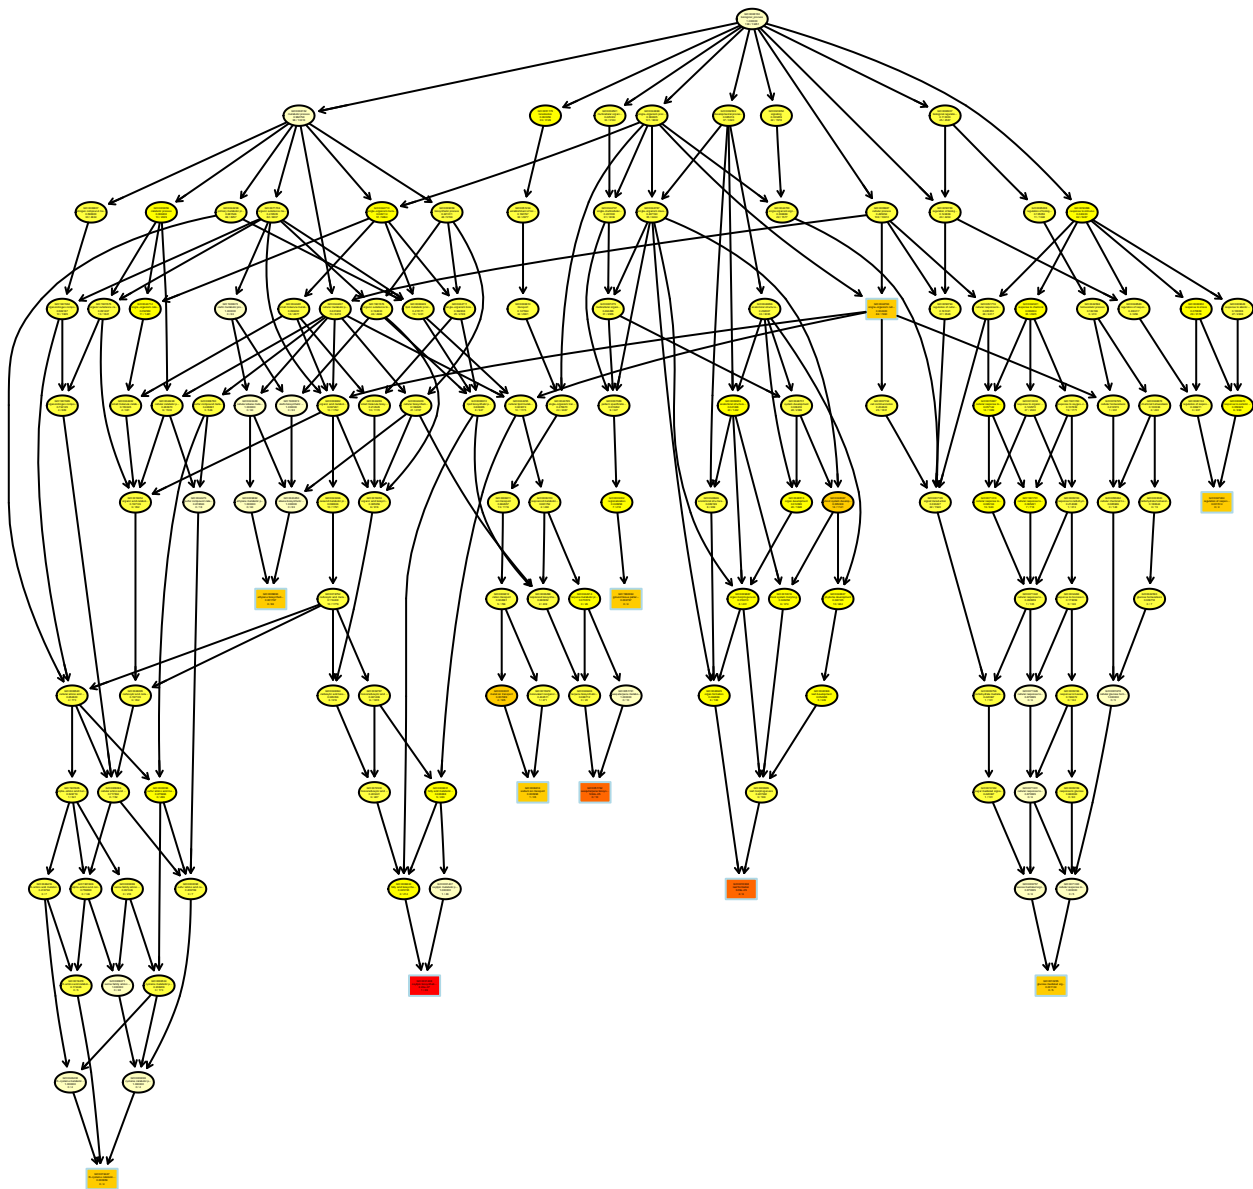

Supplement: Data_Sheet_1.ZIP [file Data_Sheet_1.ZIP]

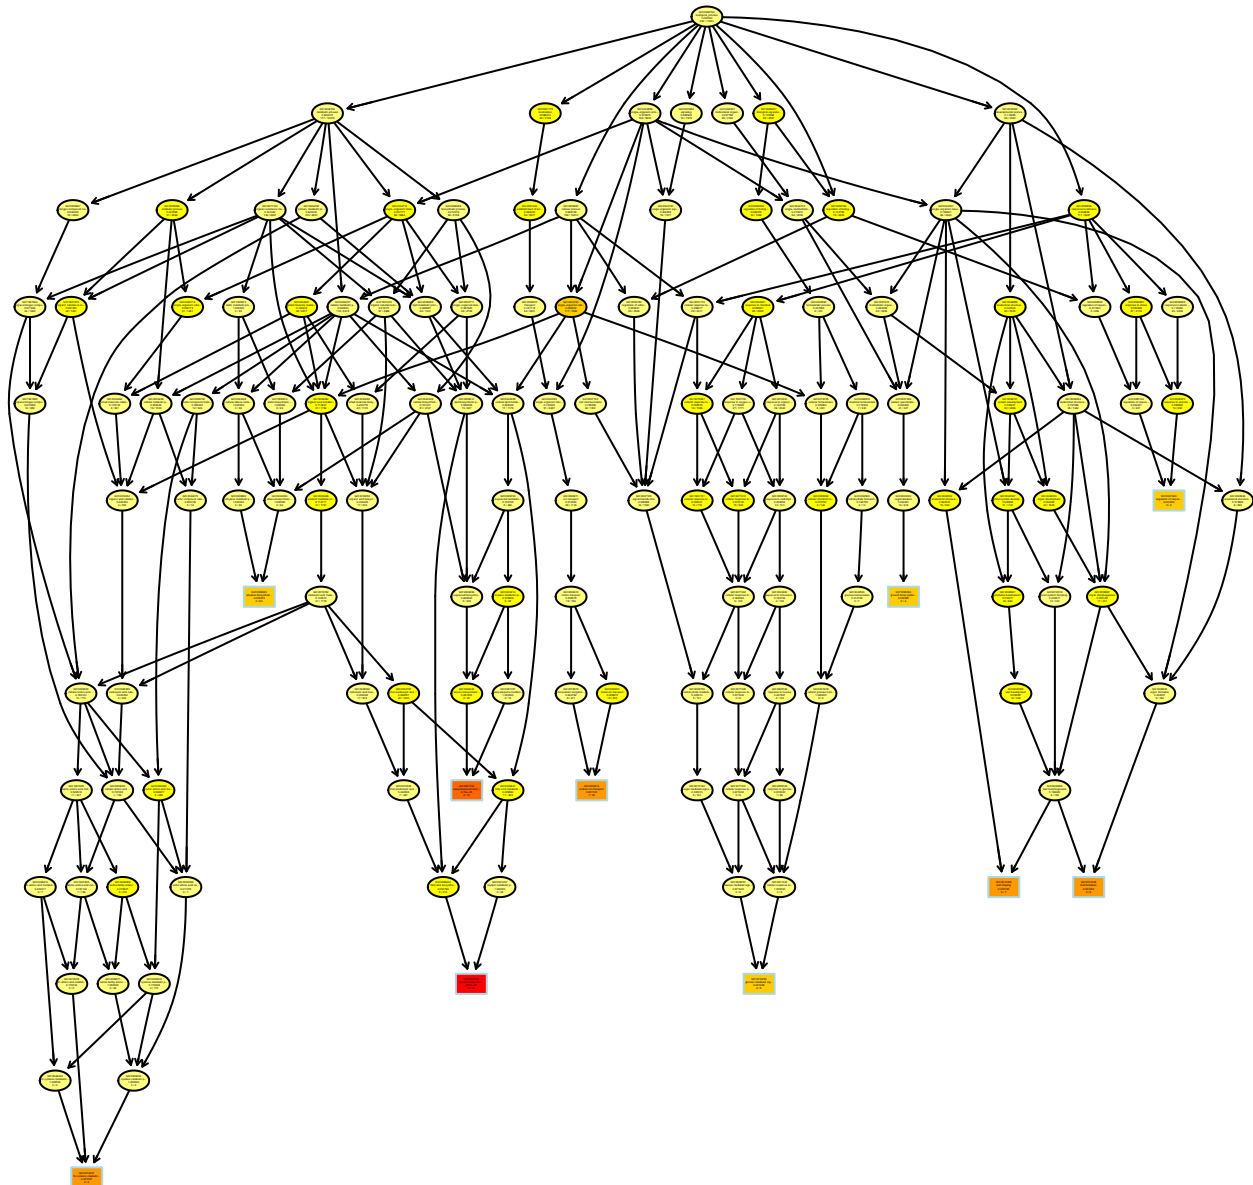

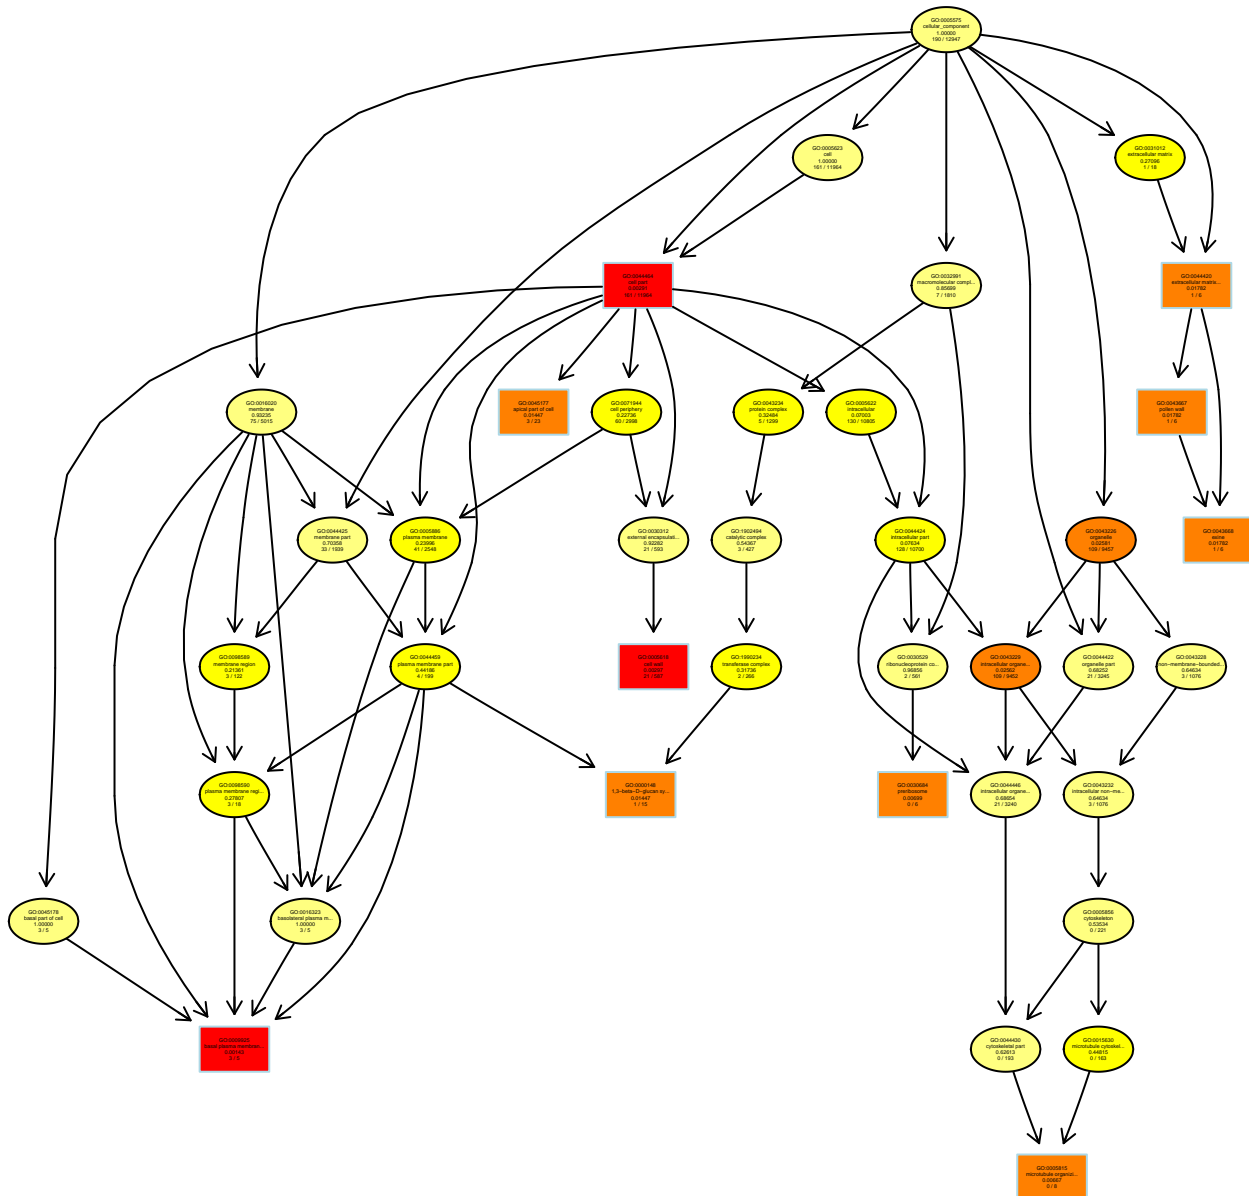

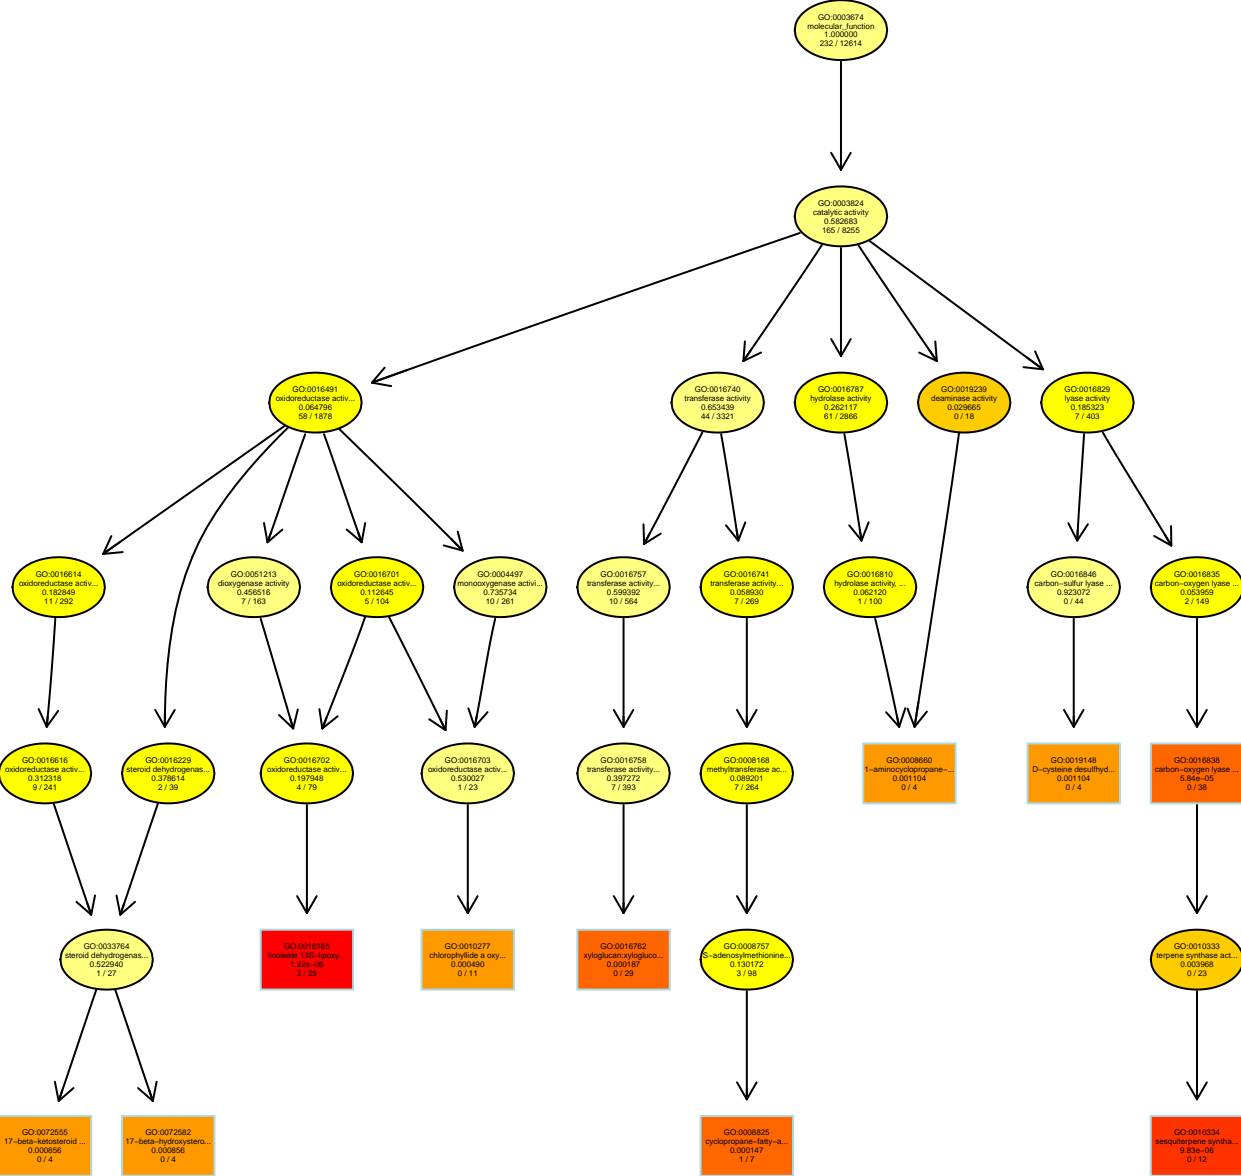

Supplement: Data_Sheet_1.ZIP [file Data_Sheet_1.ZIP]

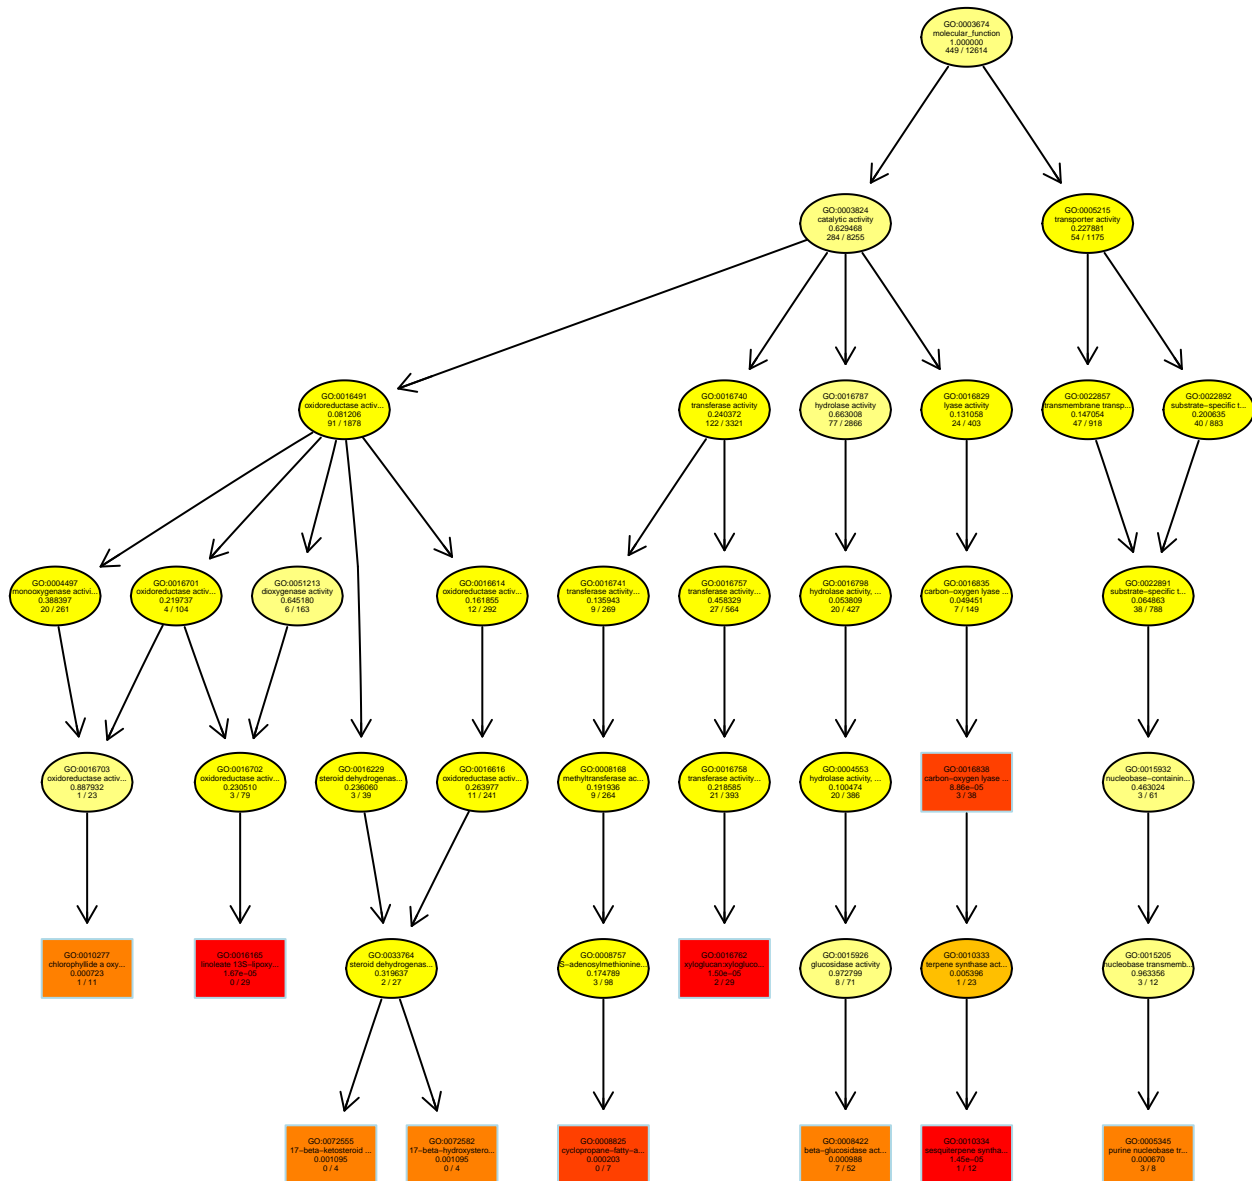

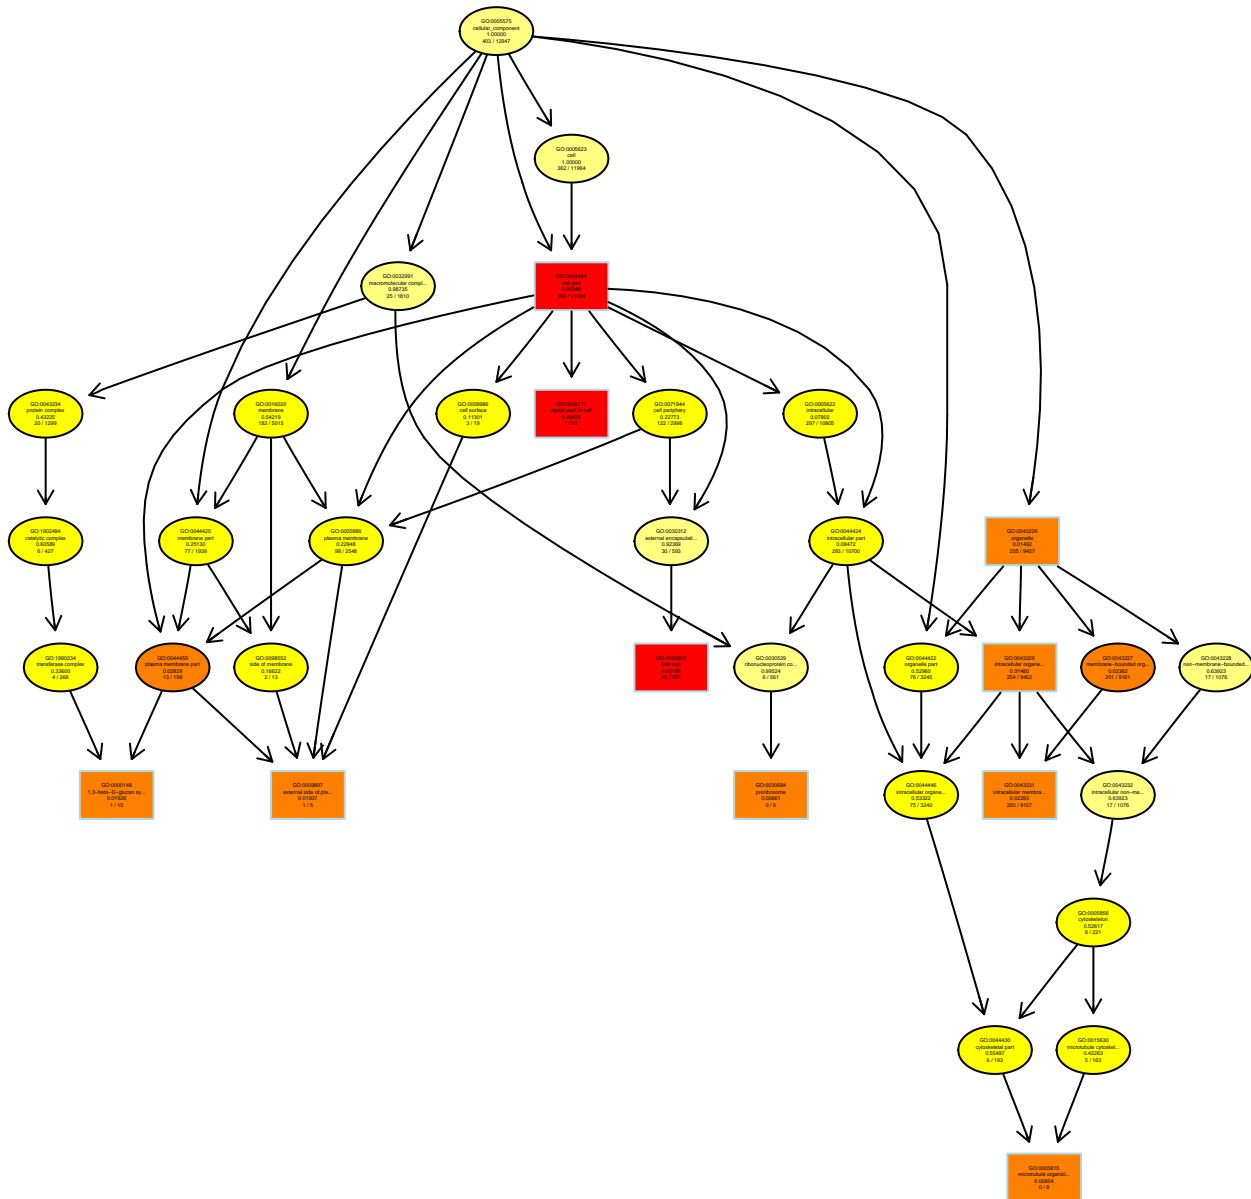

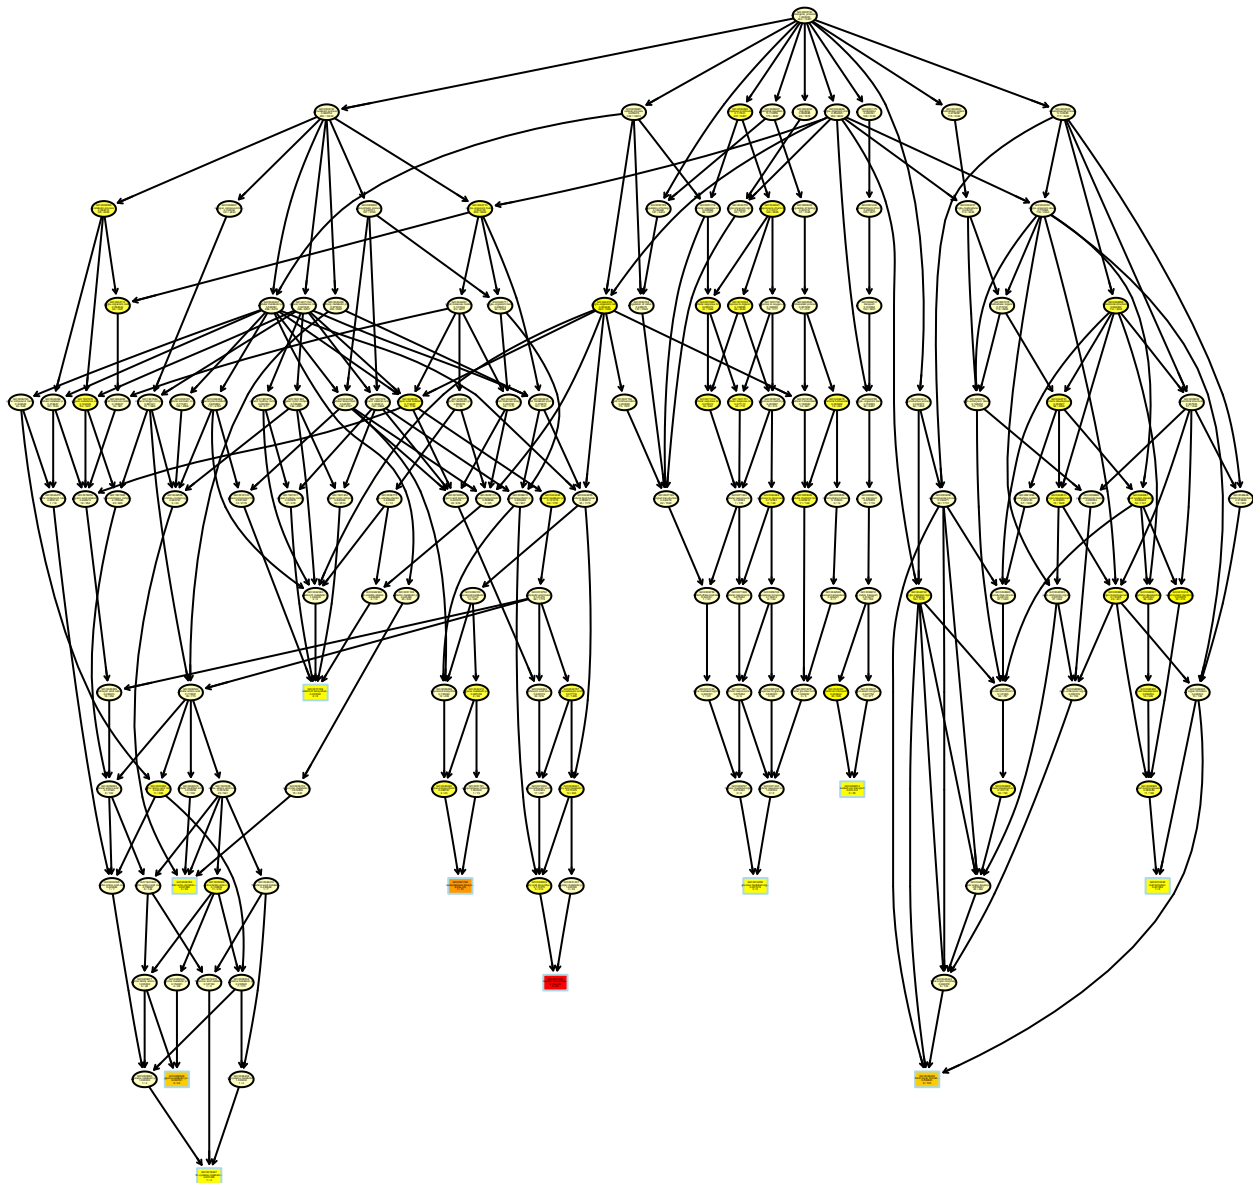

Supplement: Data_Sheet_1.ZIP [file Data_Sheet_1.ZIP]

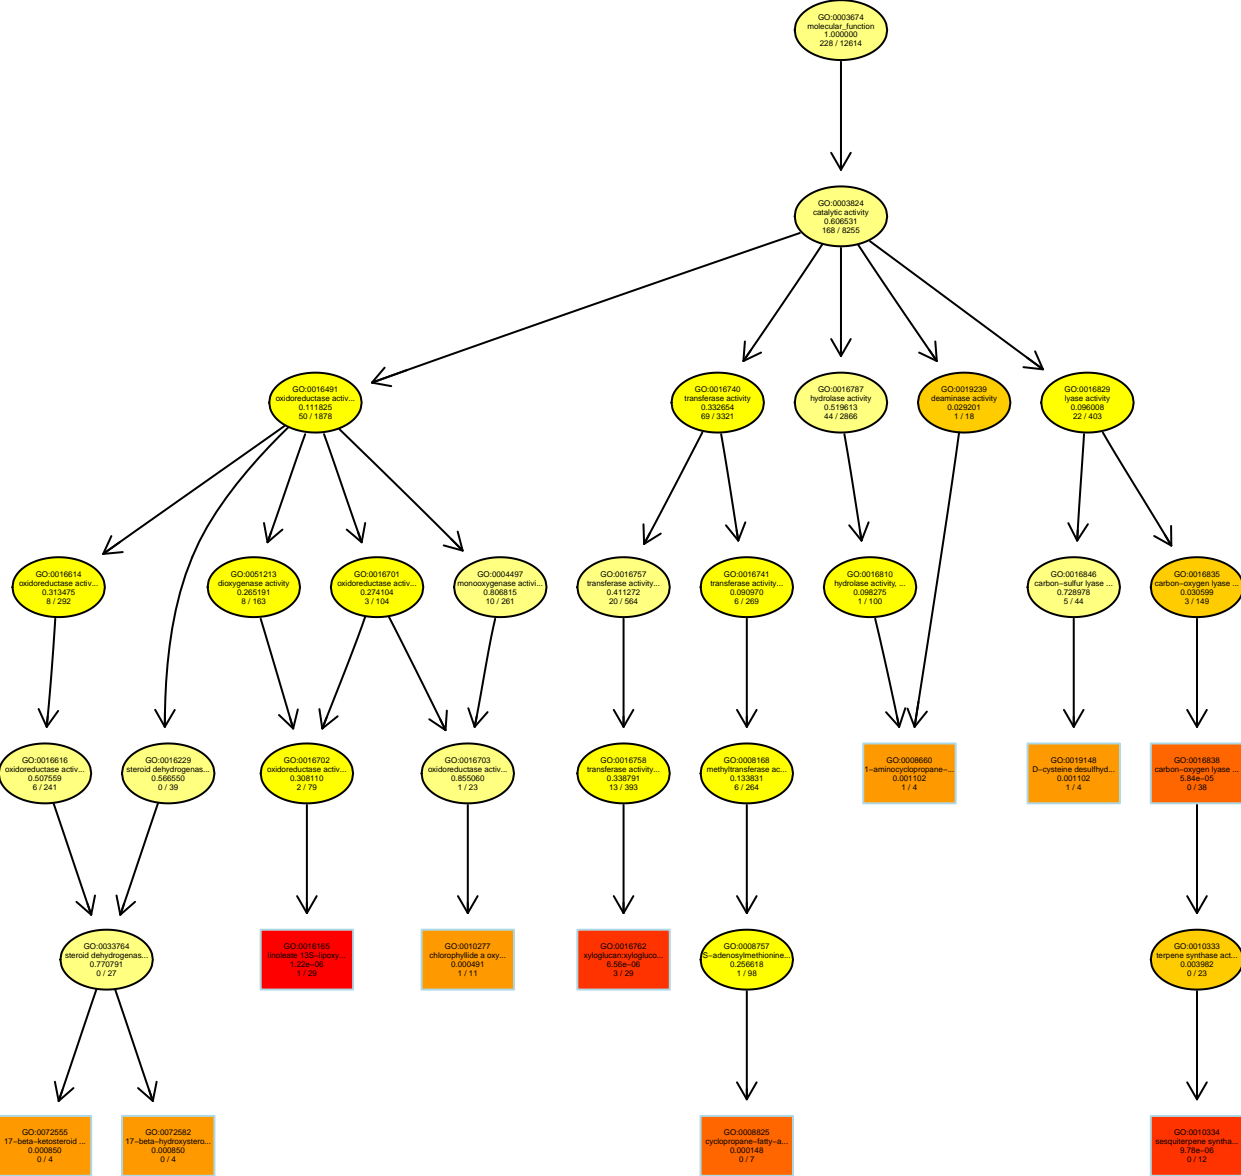

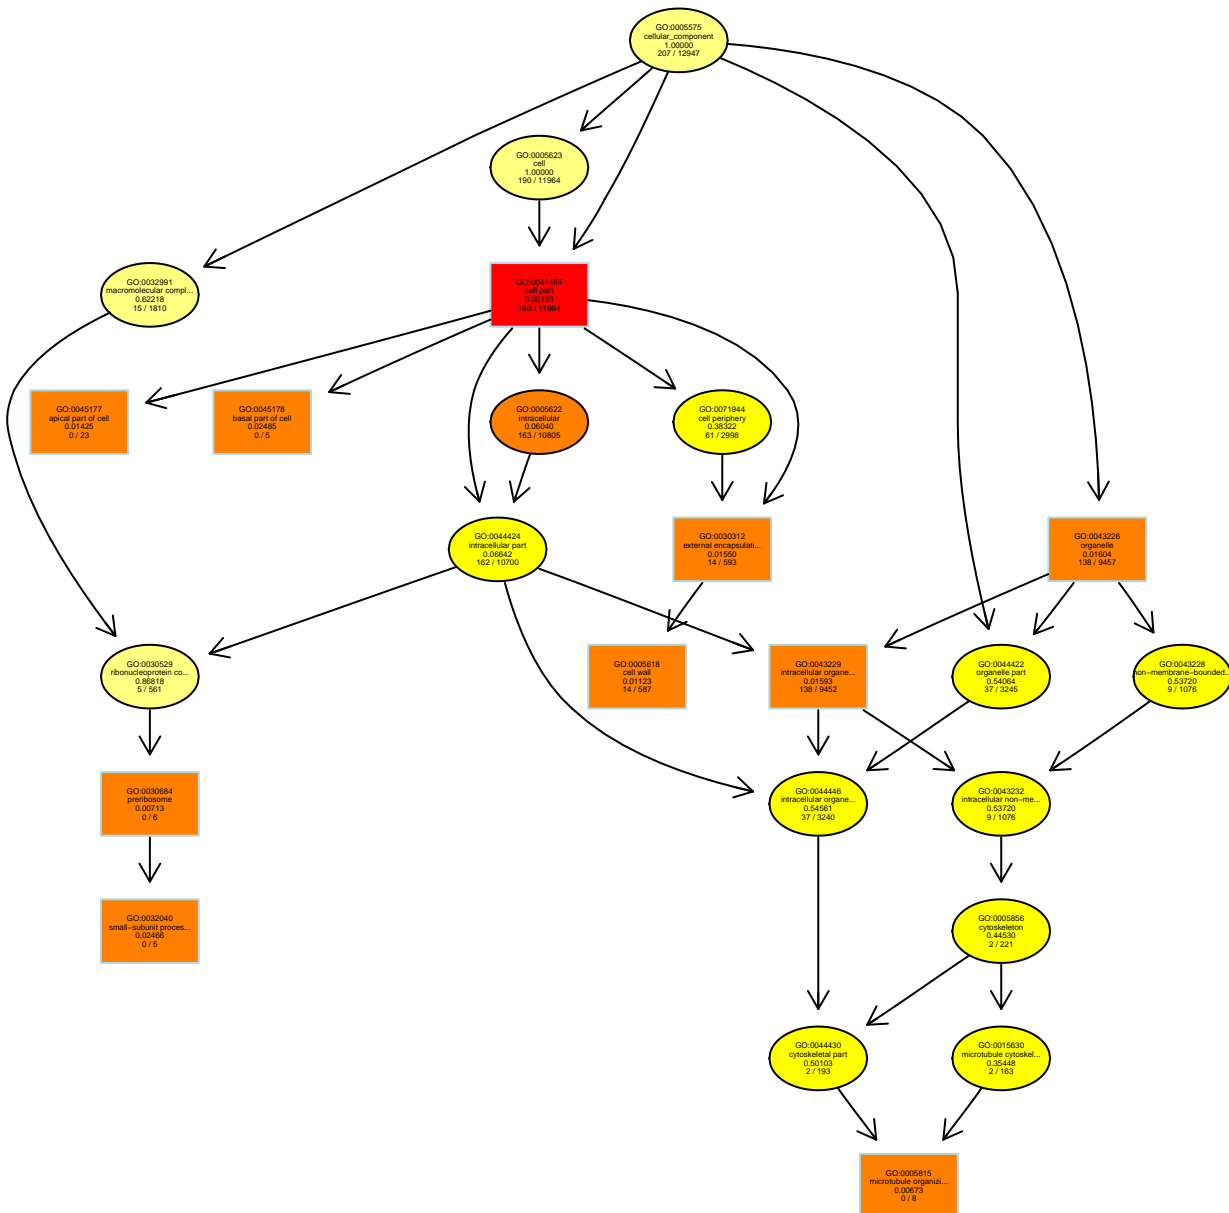

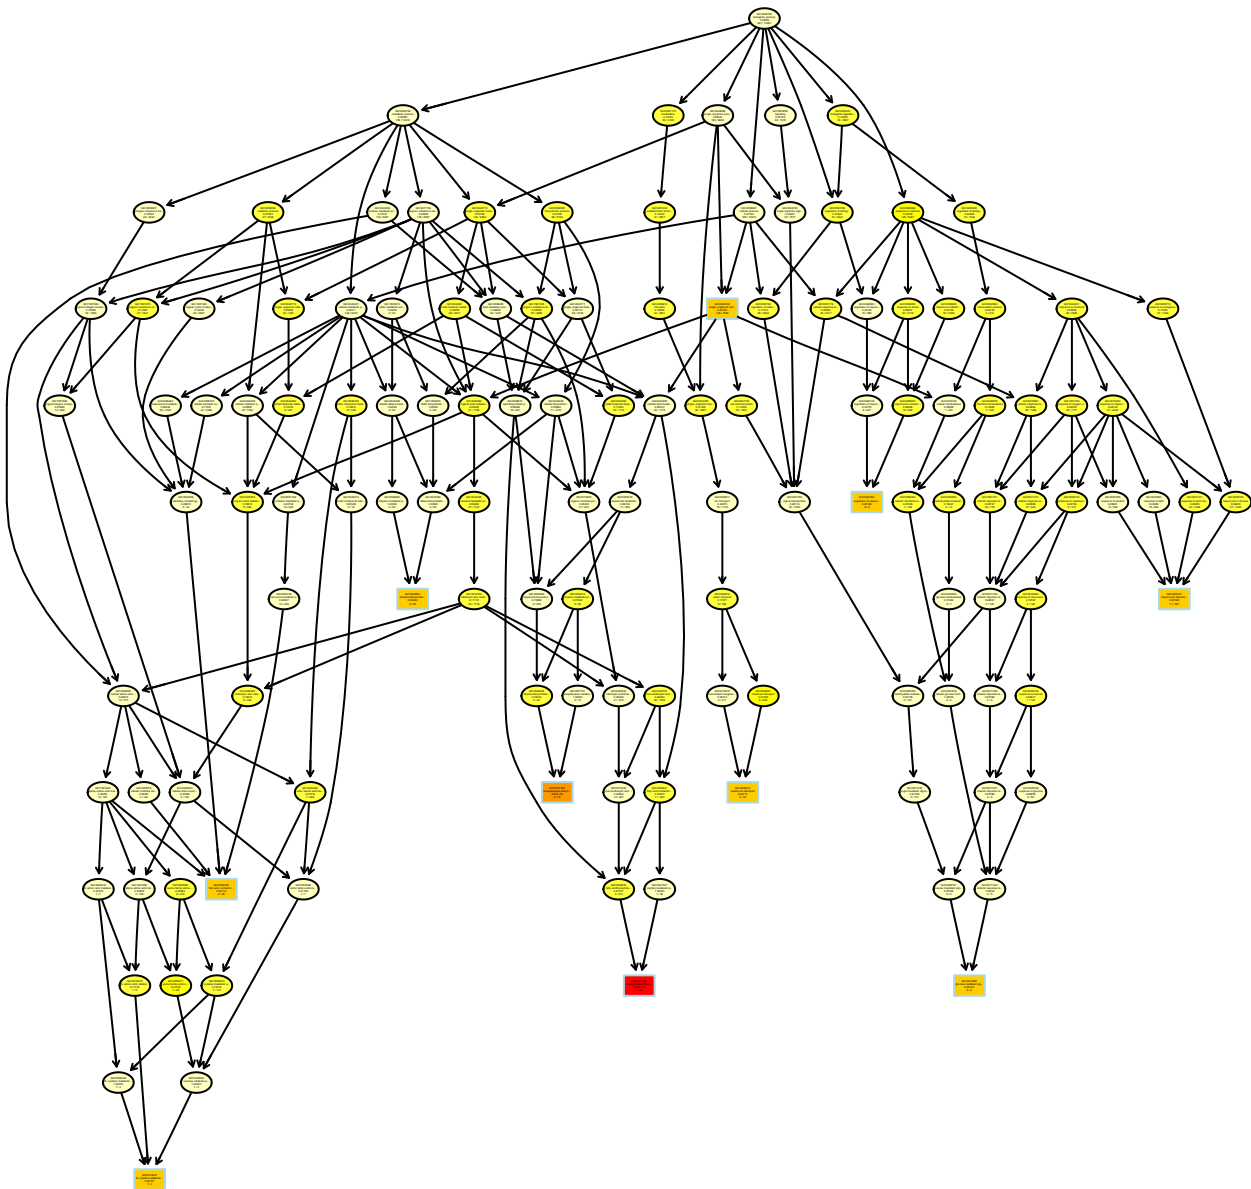

Supplement: Data_Sheet_1.ZIP [file Data_Sheet_1.ZIP]

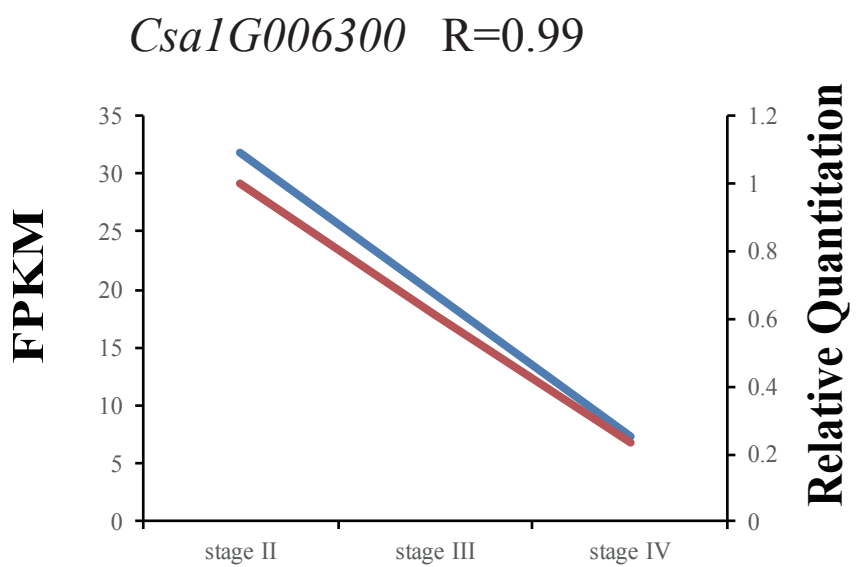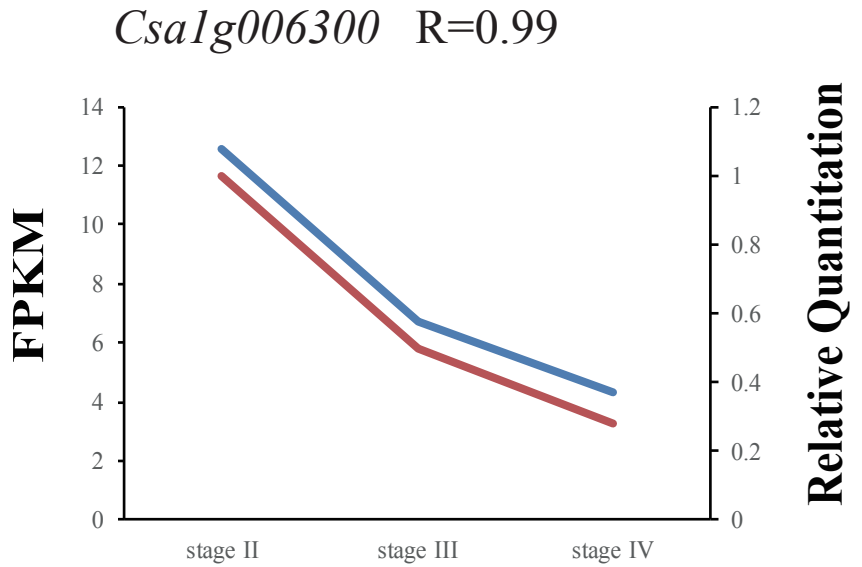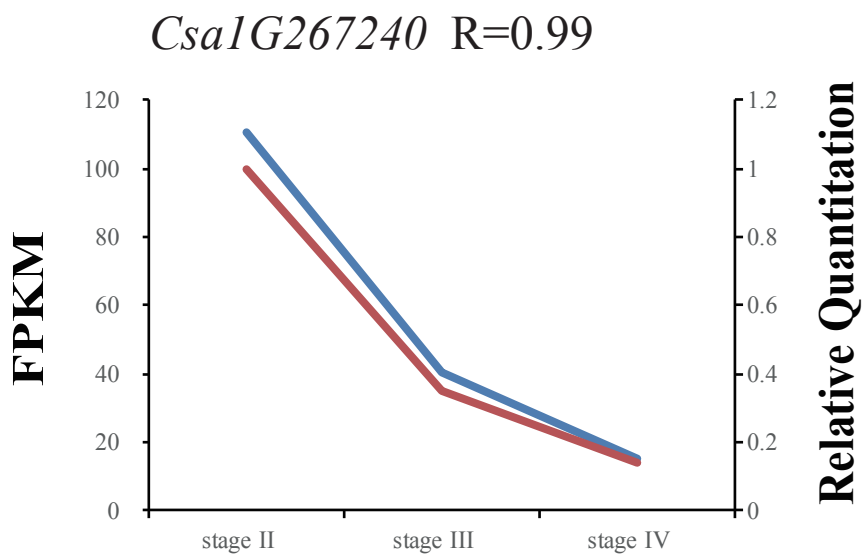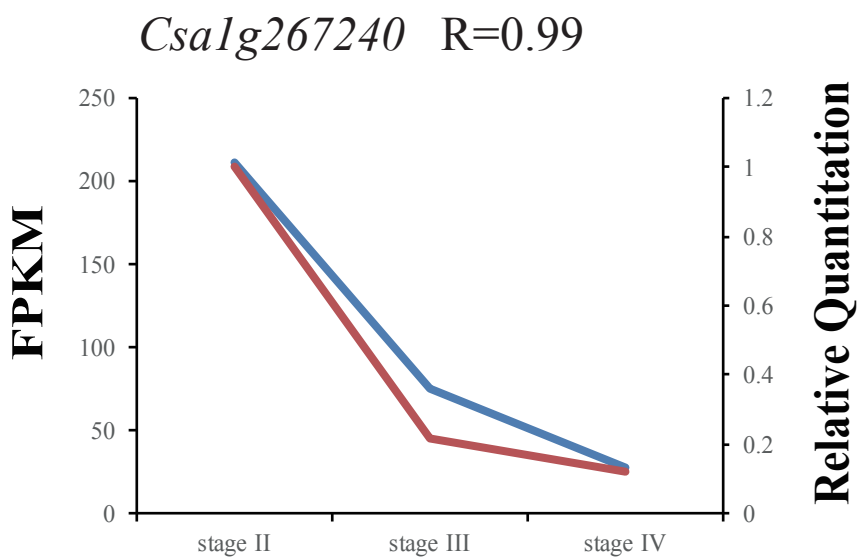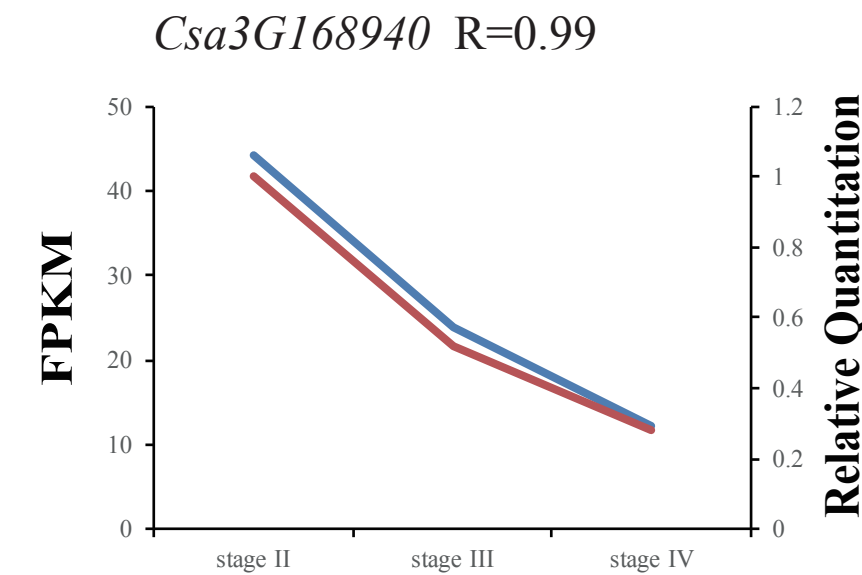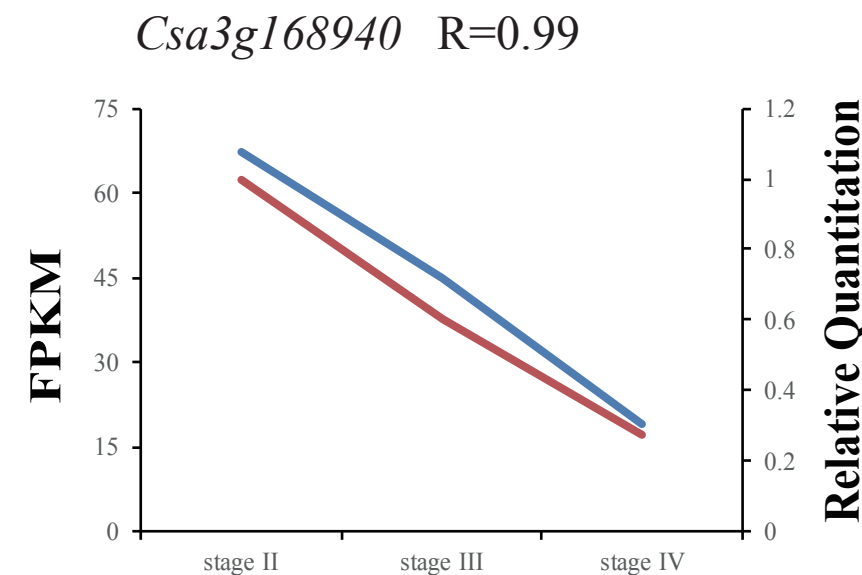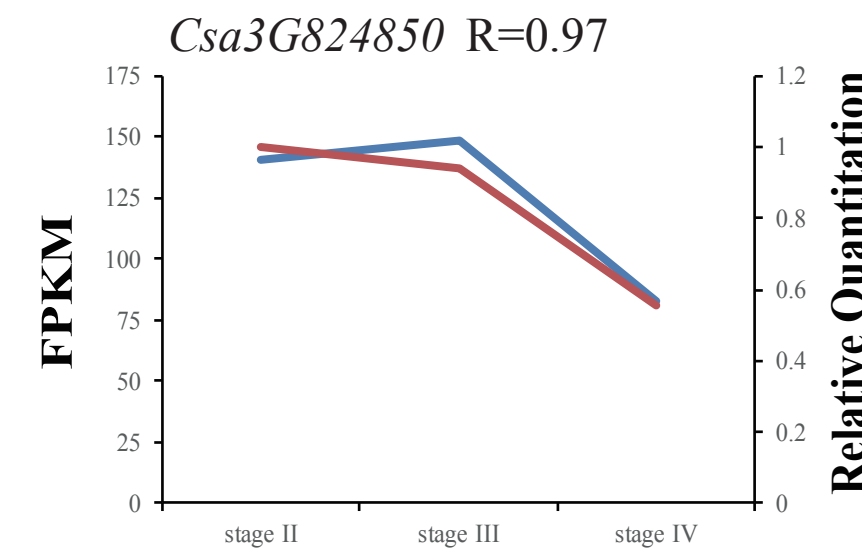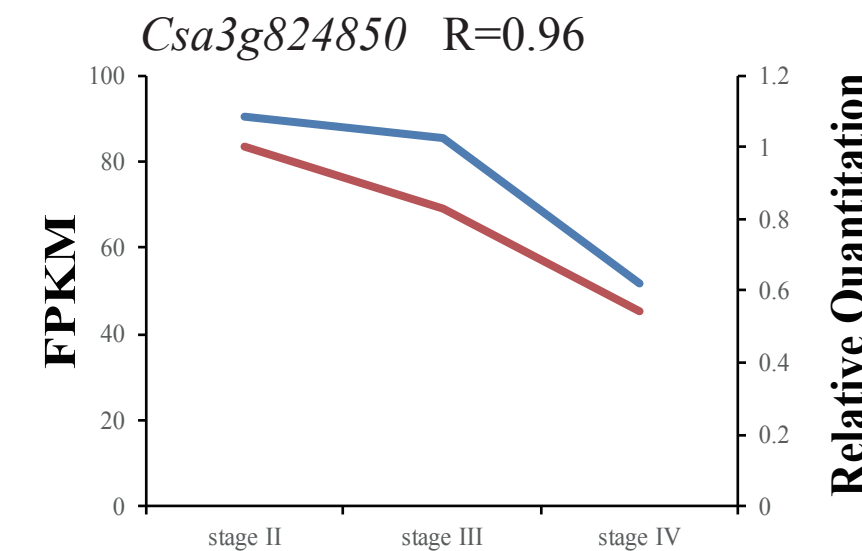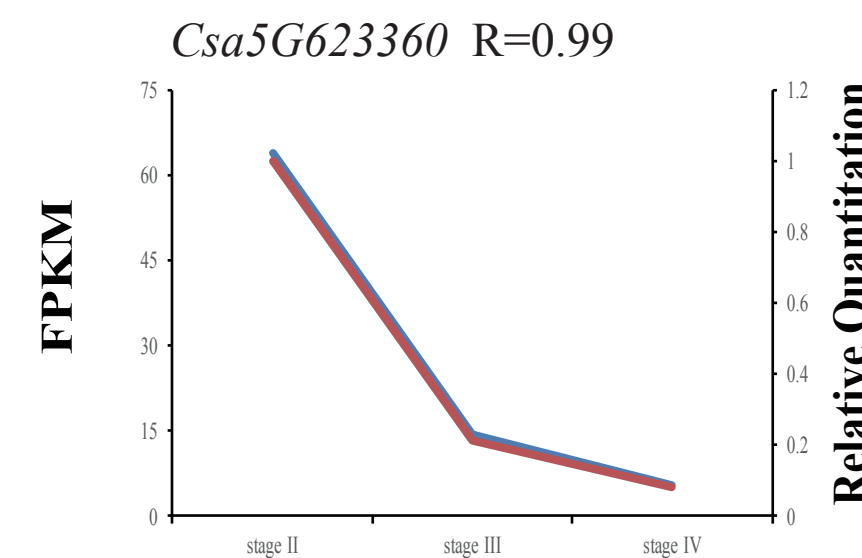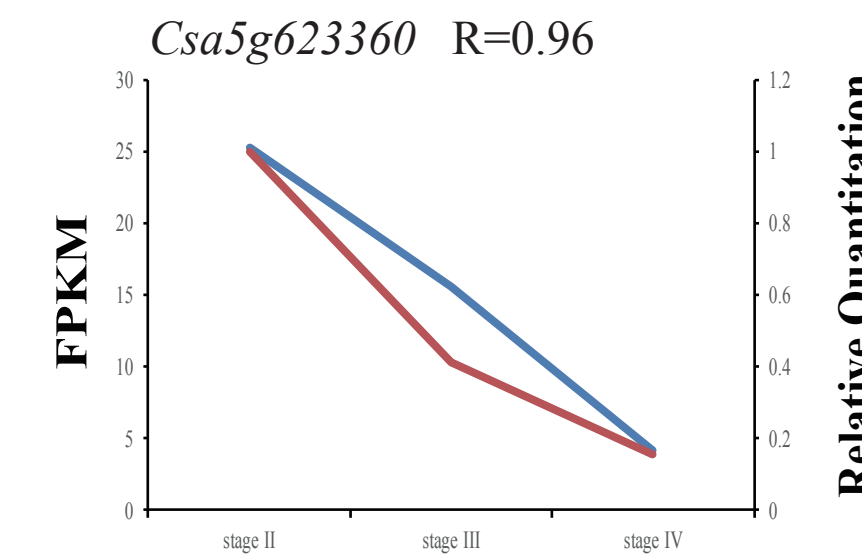

*CsTu* R=0.99

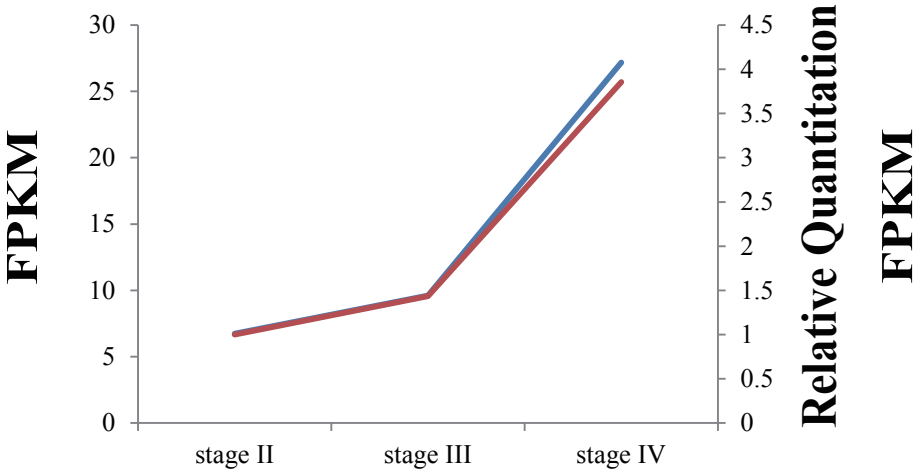

*Cstu* R=0.99

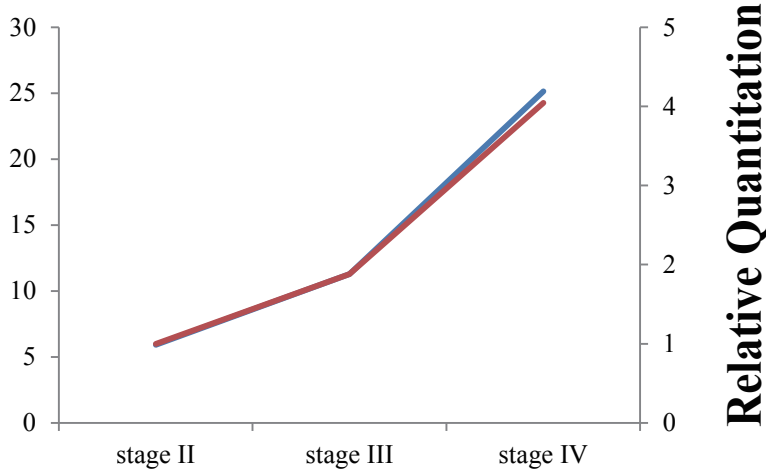

*CsMYB6* R=0.99

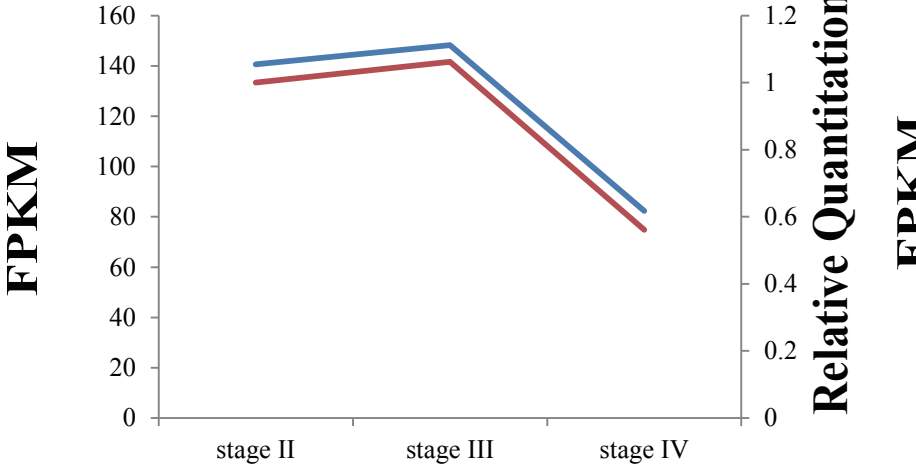

*Csmyb6* R=0.99

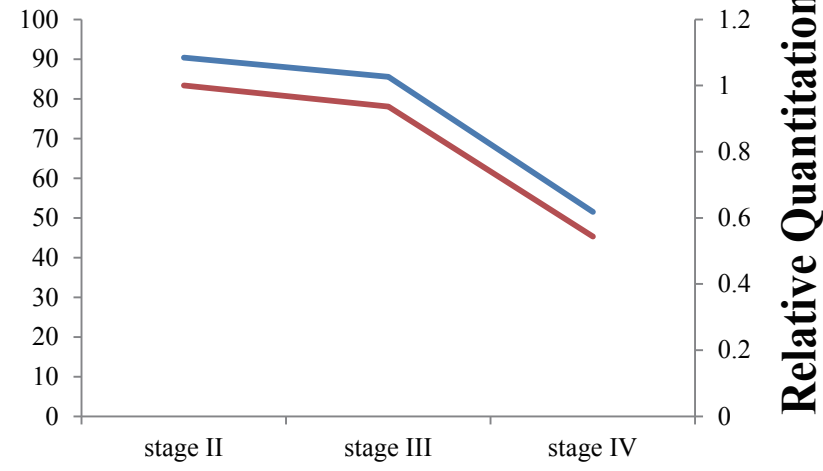

*CsMict* R=0.99

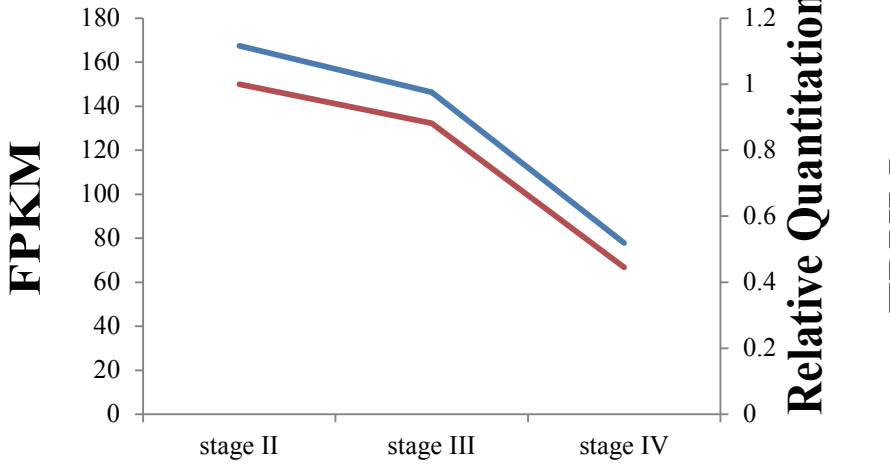

*Csmict* R=0.99

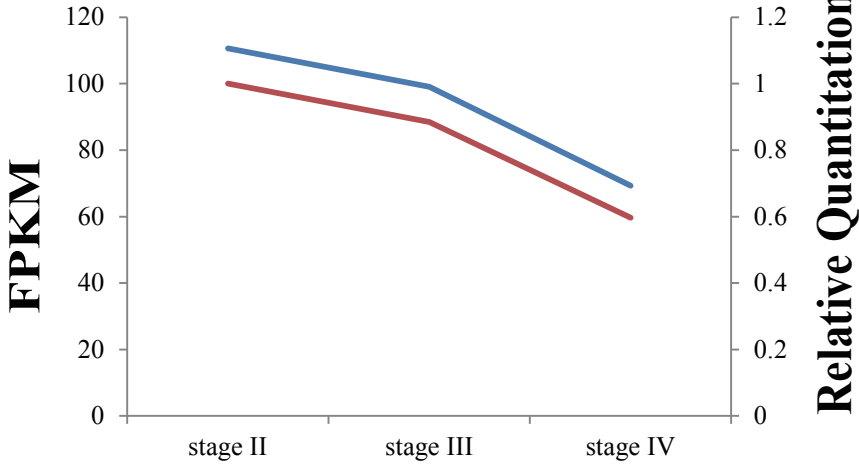

*Csa3G020060* R=0.99

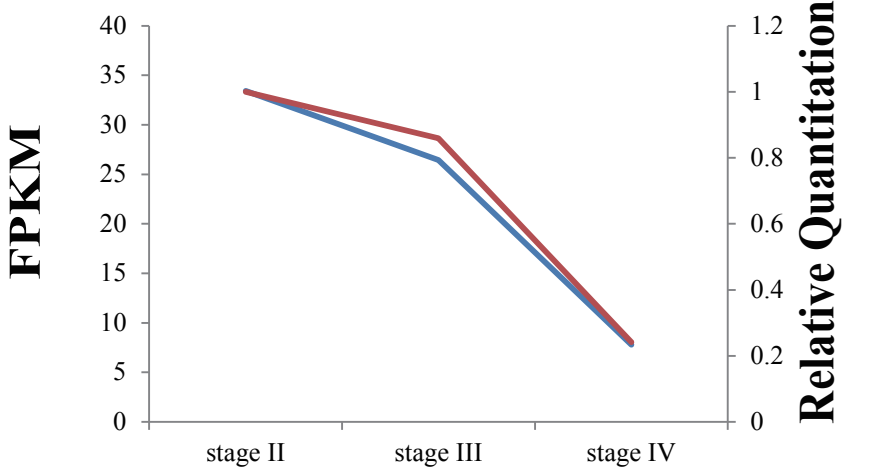

*Csa3g020060* R=0.99

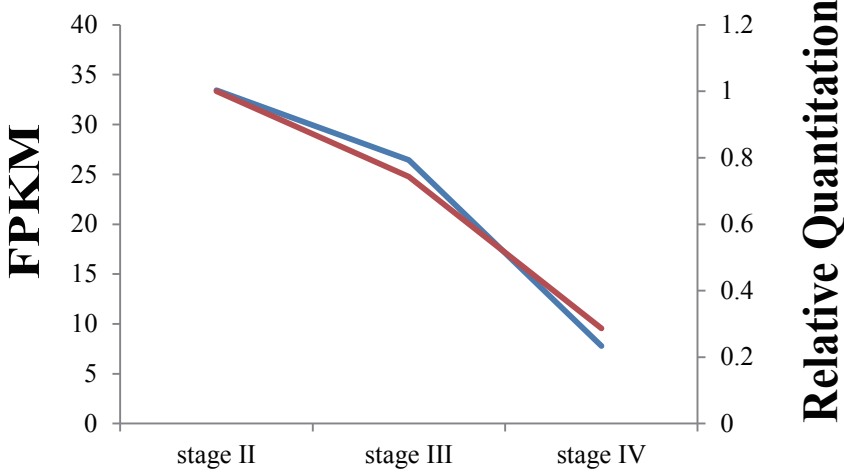

*Csa2G006270* R=0.98

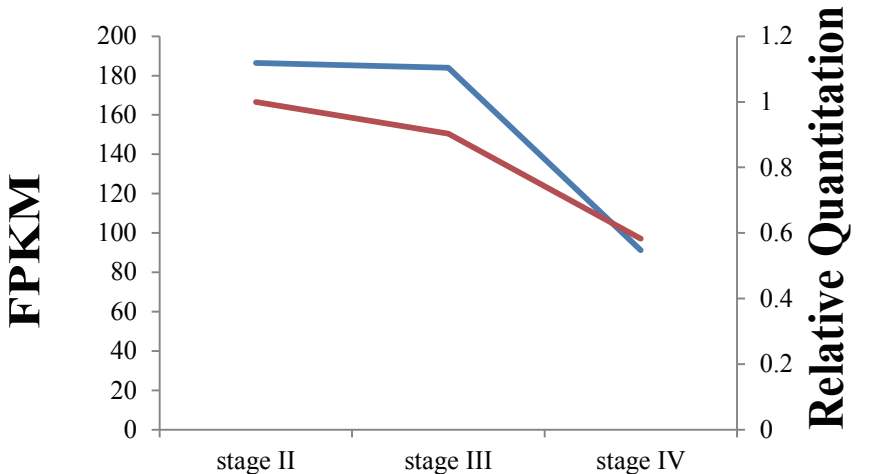

*Csa2g006270* R=0.82

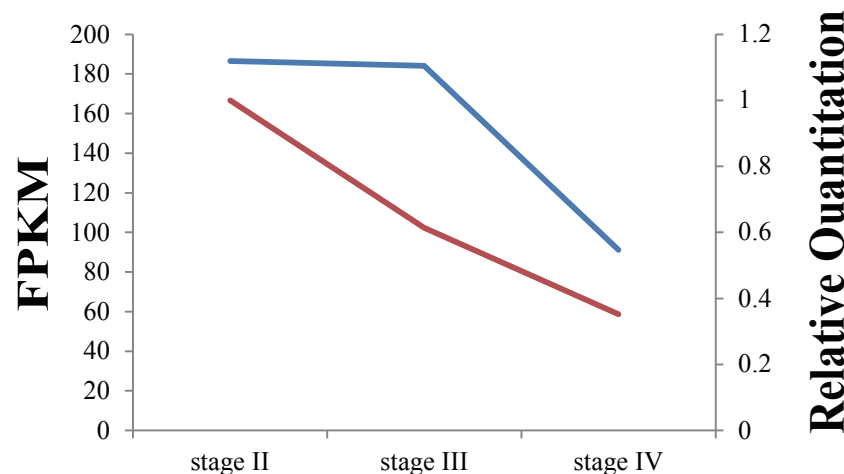

Supplement: Data_Sheet_1.ZIP [file Data_Sheet_1.ZIP]

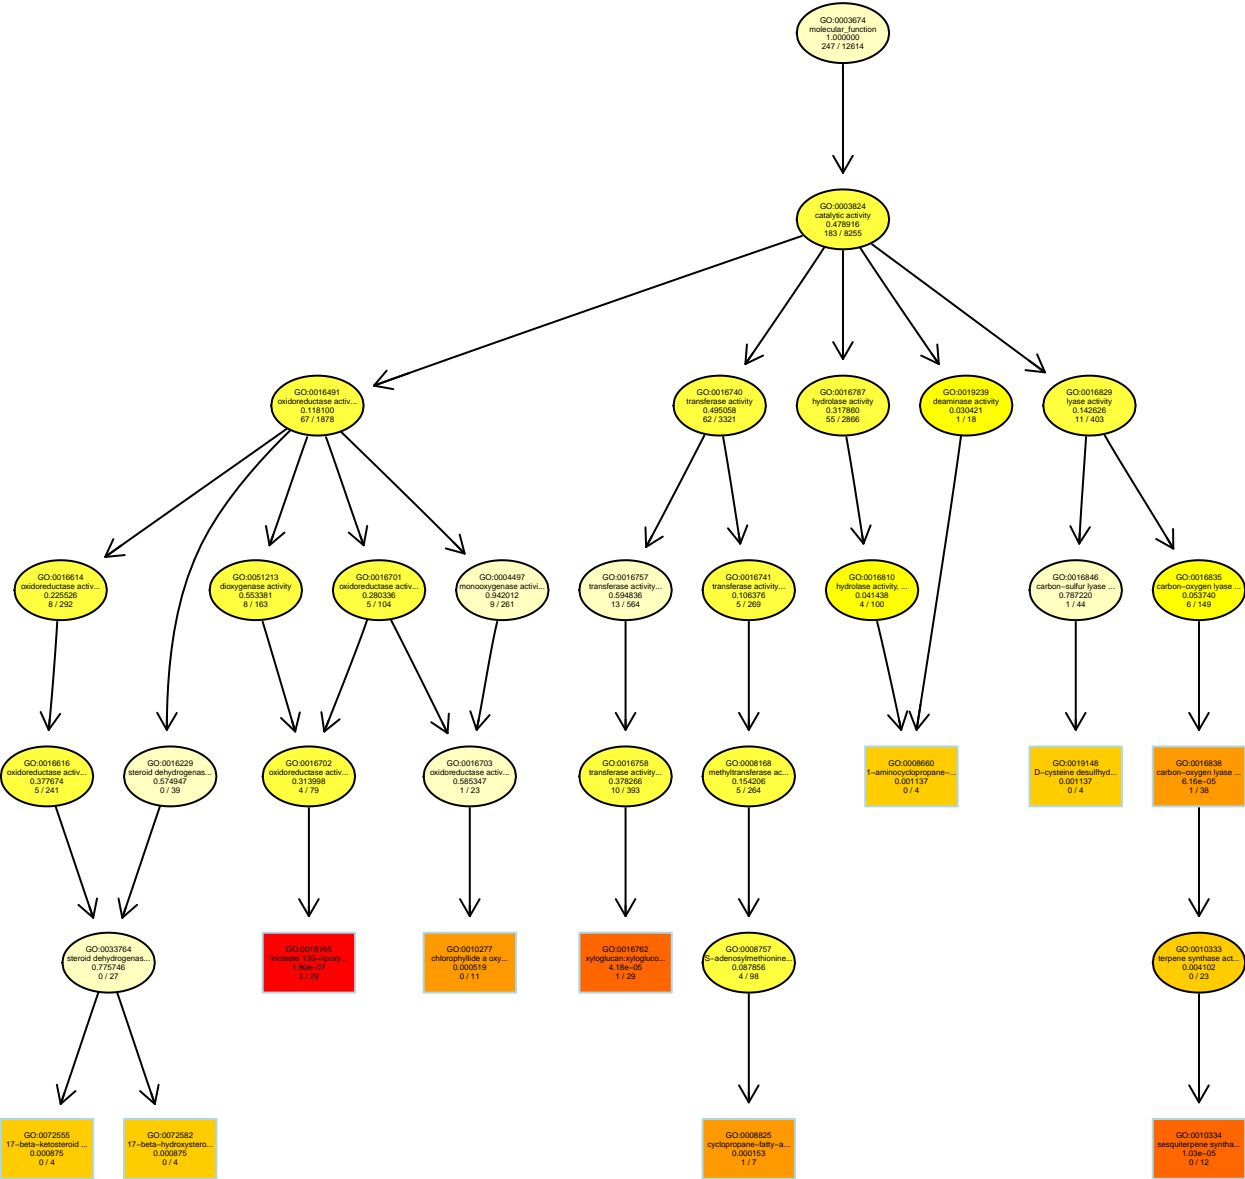

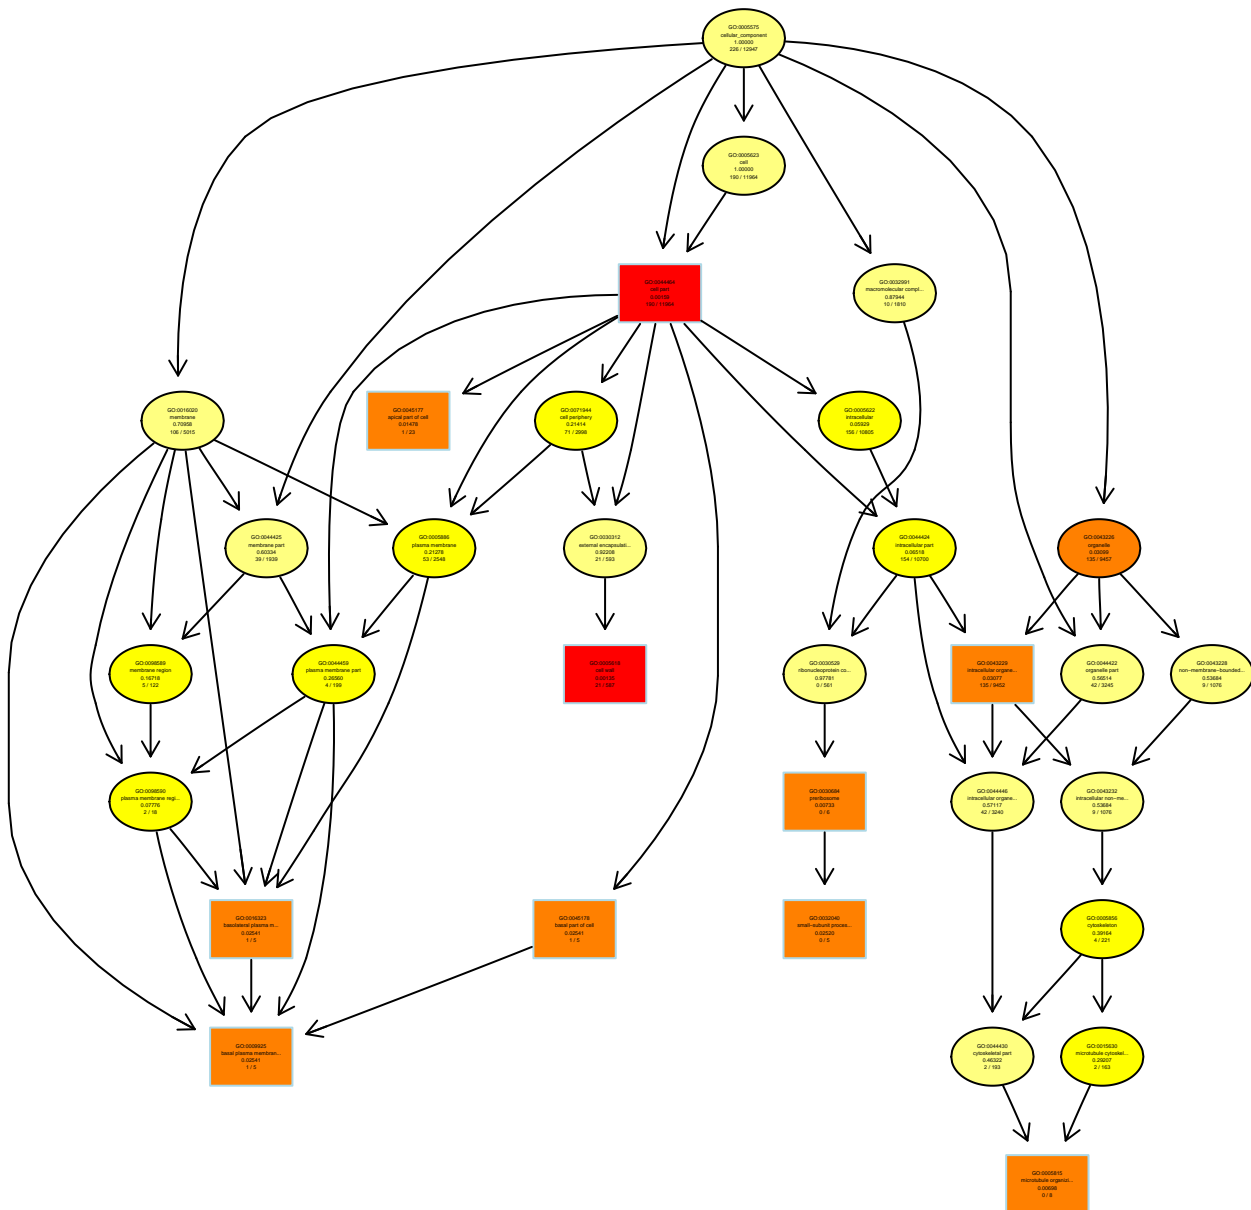

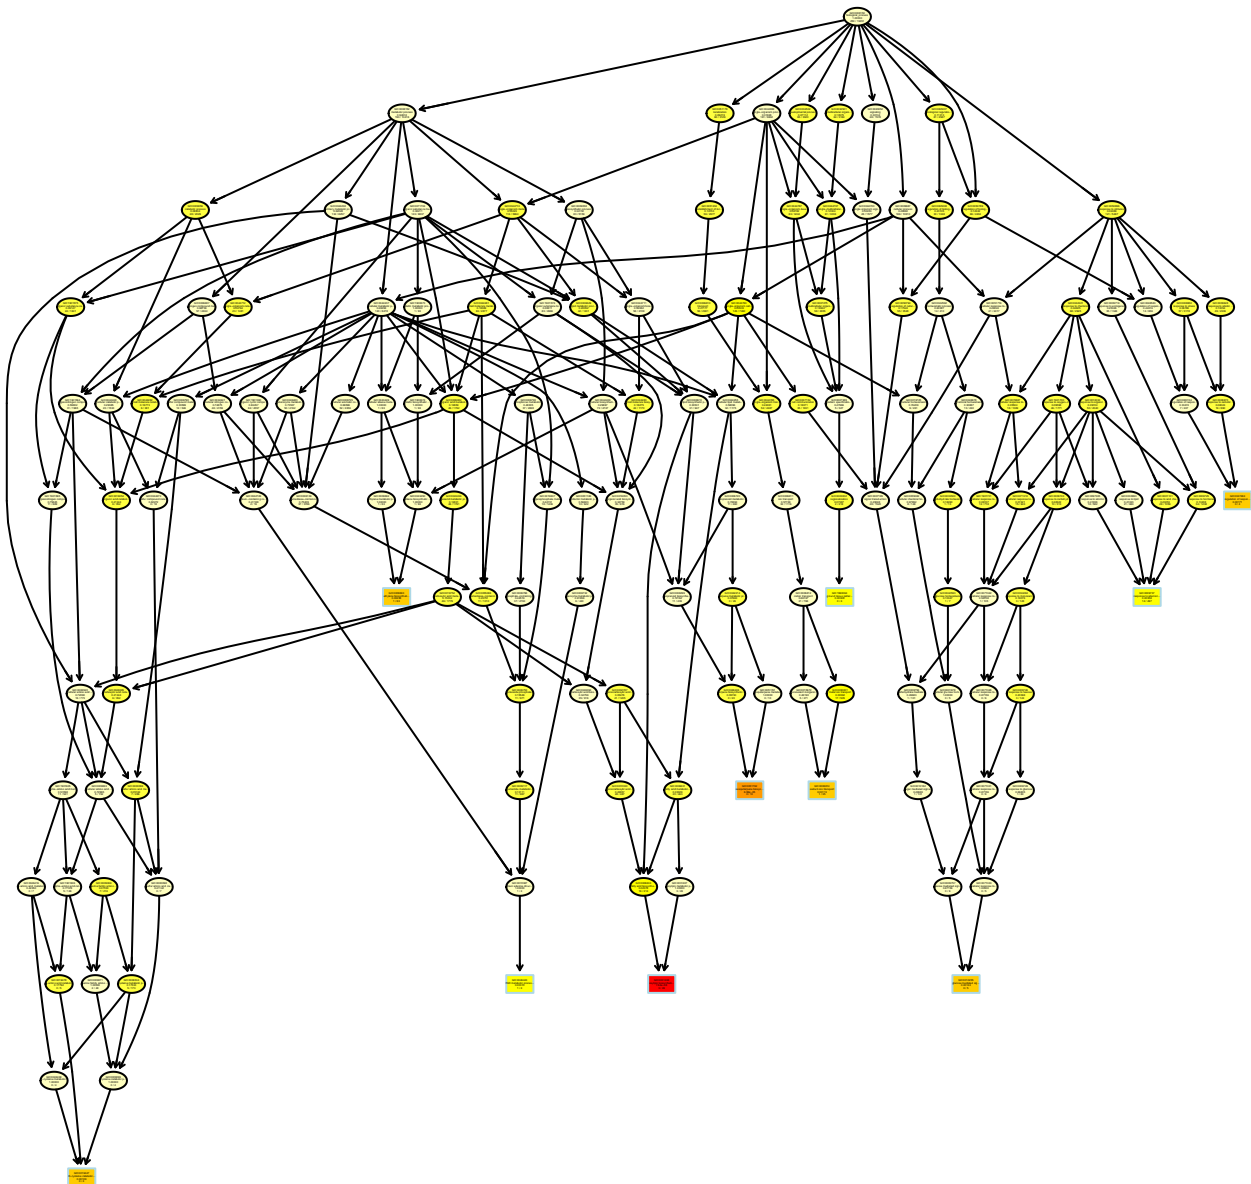

Supplement: Data_Sheet_1.ZIP [file Data_Sheet_1.ZIP]
